# Supplementary material for: Thallophilic interactions and Tl–aryl π-interactions are competitive with cation–cation repulsion: [LTl2L]2+ dications as salts of weakly co-ordinating anions
Source: Royal Society of Chemistry journal article supplement (doi:10.1039/c3dt51233a), 2013-01-01
Supplement: c3dt51233a.pdf [file c3dt51233a.pdf]

## Supporting Information for “Thalophilic interactions and Tl-aryl $\pi$ -interactions are competitive with cation-cation repulsion: $[\text{LTl}_2\text{L}]^{2+}$ dications as salts of weakly co-ordinating anions”

By J Cullinane, A Jolles and F S Mair

School of Chemistry, The University of Manchester

### Experimental Details for Synthesis and Characterization of **1** and **2**.

#### Experimental Section

The following compounds were prepared by literature methods:

2-isopropyl-*N*-[(3*E*)-3-(2-isopropylphenyl)imino-2-[*N*-(2-isopropylphenyl)-*C*-methyl-carbonimidoyl]-1-methyl-but-1-enyl]aniline, 2-isopropyl-*N*-[(*E*,3*E*)-3-(2-isopropylphenyl)imino-2-[*N*-(2-isopropylphenyl)-*C*-methyl-carbonimidoyl]-1,4,4-trimethyl-pent-1-enyl]aniline, 2-isopropyl-*N*-[(*E*,3*E*)-2-[*N*-(2-isopropylphenyl)-*C*-methyl-carbonimidoyl]-3-(2-methoxyphenyl)imino-1,4,4-trimethyl-pent-1-enyl]aniline, 2,4,6-trimethyl-*N*-[(3*E*)-1-methyl-2-[*C*-methyl-*N*-(2,4,6-trimethylphenyl)carbonimidoyl]-3-(2,4,6-trimethylphenyl)imino-but-1-enyl]aniline<sup>1</sup> and sodium *tetrakis*(*bis*-trifluoromethylphenyl)borate.<sup>2</sup> Other reagents were purchased from commercial vendors and used as received.

Dichloromethane and hexane were used freshly distilled from calcium hydride and sodium-potassium alloy, respectively. Preparation of thallium *tetrakis*(*bis*-trifluoromethylphenyl)borate was done in air. Complex synthesis was conducted via Schlenk techniques under a nitrogen blanket. Once crystallized, complexes were briefly handleable in air. Elemental analyses were obtained from The University of Manchester Microanalytical Laboratory. CAUTION: all thallium reagents, products and wastes must be treated as highly poisonous, and collected for professional disposal.

Preparation of thallium *tetrakis*(*bis*-trifluoromethylphenyl)borate

This preparation was done in air. Na[BArF] (4.20 g, 4.46 mmol) was dissolved in acetone (20 mL). To this stirred solution was added a solution of TlNO<sub>3</sub> (1.12 g, 4.46 mmol) in acetone (5 mL) and water (15 mL). Some white solid precipitated. The mixture was slowly concentrated to 40% of its original volume by passage of nitrogen over its surface. The white solid product was Buchner filtered, washed with water and dried in air to yield 2.98 g (61.3%) of white powder Tl[BArF], mp. 123-125 °C. Powder X-ray diffraction matched the pattern computed from published single crystal data, as did <sup>1</sup>H NMR {d 7.75 (s), 7.60 (s)}.<sup>2</sup>

Complexes **1** and **2** were prepared by identical procedures: Details for **1**: 2-isopropyl-*N*-[(3*E*)-3-(2-isopropylphenyl)imino-2-[*N*-(2-isopropylphenyl)-*C*-methyl-carbonimidoyl]-1-methyl-but-1-enyl]aniline (0.227 g, 0.46 mmol) was placed in a Schlenk tube and dissolved in dichloromethane (20 mL). Solid Tl[BArF] (0.491 g, 0.46 mmol) was added to yield a yellow solution, which was stirred for 3 h prior to being filtered under nitrogen. The volume was then reduced by half *in vacuo*. Layering of the residue with hexane (20 mL) and standing at rt for 3 d gave crystals, isolated by filtration, of [HC{MeC=N(2-*i*PrC<sub>6</sub>H<sub>4</sub>)<sub>3</sub>Tl]<sub>2</sub>[BArF]<sub>2</sub>·C<sub>6</sub>H<sub>14</sub>, **1** (0.531 g, 72%). m.p. 162-163 °C. Elemental anal., calcd. for C<sub>69</sub>H<sub>62</sub>N<sub>3</sub>TlF<sub>24</sub>B (%) : C, 51.65; H, 3.90; N, 2.62. Found: C, 51.17; H, 3.75; N, 2.56. MS (MALDI) *m/z*: 696-699 [(L)Tl]<sup>+</sup>, isotope abundances were consistent with gas-phase monomer ions. <sup>1</sup>H NMR (400 MHz, 295 K, CDCl<sub>3</sub>):  $\delta$  1.39 (18H, br, apparent s, CH(CH<sub>3</sub>)<sub>2</sub>), 2.21 (9H, s, CH<sub>3</sub>C=N), 2.82 (3H, br, apparent s, CH(CH<sub>3</sub>)<sub>2</sub>), 5.32 (1H, br s,  $\alpha$ -CH), 6.6-7.4 (12H, br, complex m, aryl CH), 7.45 (4H, s, BArF *o*-CH), 7.62 (8H, s, BArF *p*-CH).

Compound **2** was prepared and characterized analogously. **2**: from 2-isopropyl-*N*-[(*E*,3*E*)-3-(2-isopropylphenyl)imino-2-[*N*-(2-isopropylphenyl)-*C*-methyl-carbonimidoyl]-1,4,4-trimethyl-pent-1-enyl]aniline (0.220 g, 0.41 mmol), yielded 0.38 g (57.7%) of [HC{MeC=N(2-*i*PrC<sub>6</sub>H<sub>4</sub>)<sub>2</sub>tBuC=N(2-*i*PrC<sub>6</sub>H<sub>4</sub>)Tl]<sub>2</sub>[BArF]<sub>2</sub>, **2**. m.p. = 168-170 °C. Elemental analysis, calcd. for C<sub>69</sub>H<sub>61</sub>N<sub>3</sub>TlF<sub>24</sub>B (%) : C, 51.59; H, 3.83; N, 2.61. Found: C, 50.48; H, 3.65; N, 2.48; Tl, 11.93. <sup>1</sup>H NMR (400 MHz, 295 K, CDCl<sub>3</sub>):  $\delta$ :  $\delta$  1.12-1.18 (9H, 3 overlapping d, CH(CH<sub>3</sub>)<sub>2</sub>), 1.20 (3H, d, CH(CH<sub>3</sub>)<sub>2</sub>), 1.23 (9H, s, C(CH<sub>3</sub>)<sub>3</sub>), 1.25-1.31 (6H, 2 overlapping d, CH(CH<sub>3</sub>)<sub>2</sub>), 2.33 (3H, s, CH<sub>3</sub>C=N), 2.41 (3H, s, CH<sub>3</sub>C=N), 2.48 (1H, septet, CH(CH<sub>3</sub>)<sub>2</sub>), 2.54 (1H, septet, CH(CH<sub>3</sub>)<sub>2</sub>), 2.63 (1H, septet, CH(CH<sub>3</sub>)<sub>2</sub>), 5.74 (1H, s,  $\alpha$ -CH), 6.53 (1H, d, *o*-CH), 6.56 (1H, *o*-CH), 6.60 (1H, d, *o*-CH), 7.23-7.54 (9H, non-first-order m, other aromatic CH), 7.54 (4H, s, BArF<sub>4</sub> *p*-CH), 7.71 (8H, s, BArF<sub>4</sub> *o*-CH). <sup>19</sup>F NMR (376 MHz, CDCl<sub>3</sub>):  $\delta$  -62.20 (s, BArF<sub>4</sub> CF<sub>3</sub>).

Crystals were mounted in perfluoropolyether oil onto the goniometer of an Oxford Diffraction X-Calibur 2 diffractometer fitted with an Oxford Diffraction Cryostream 700. Reflections were collected using graphite-monochromated Mo-*K* <sub>$\alpha$</sub>  radiation. Data were collected and processed by the programs CrysAlis PRO and CrysAlis RED,<sup>3</sup> and solved and refined using SHELXS and SHELXL.<sup>4</sup>

X-Ray Data Collection Summary Tabulated overleaf.

**Table 1.** X-ray data collection and refinement details

| Compound                                        | <b>1</b>                                                                                                                                                  | <b>2</b>                                                                                               |
|-------------------------------------------------|-----------------------------------------------------------------------------------------------------------------------------------------------------------|--------------------------------------------------------------------------------------------------------|
| Formula                                         | C <sub>34</sub> H <sub>43</sub> N <sub>3</sub> Tl<br>C <sub>32</sub> H <sub>12</sub> BF <sub>24</sub><br>(C <sub>6</sub> H <sub>14</sub> ) <sub>0.5</sub> | C <sub>37</sub> H <sub>49</sub> N <sub>3</sub> TlC<br>C <sub>32</sub> H <sub>12</sub> BF <sub>24</sub> |
| M <sub>w</sub>                                  | 1604.41                                                                                                                                                   | 1603.40                                                                                                |
| Crystal system                                  | Triclinic                                                                                                                                                 | Triclinic                                                                                              |
| a/Å                                             | 12.8319(4)                                                                                                                                                | 14.8168(4)                                                                                             |
| b/Å                                             | 16.0697(5)                                                                                                                                                | 16.3174(7)                                                                                             |
| c/Å                                             | 17.3854(6)                                                                                                                                                | 16.4832(6)                                                                                             |
| α°                                              | 98.692(3)                                                                                                                                                 | 73.129(4)                                                                                              |
| β°                                              | 105.005(3)                                                                                                                                                | 79.390(3)                                                                                              |
| γ°                                              | 90.030(2)                                                                                                                                                 | 63.442(3)                                                                                              |
| Space group                                     | P-1                                                                                                                                                       | P-1                                                                                                    |
| Z                                               | 2                                                                                                                                                         | 2                                                                                                      |
| Temp. (K)                                       | 120(2)                                                                                                                                                    | 120(2)                                                                                                 |
| μ/mm <sup>-1</sup>                              | 2.470                                                                                                                                                     | 2.481                                                                                                  |
| Reflns. measd.                                  | 24638                                                                                                                                                     | 38437                                                                                                  |
| Reflns. Obsd <sup>[a]</sup> (R <sub>int</sub> ) | 10498 (0.037)                                                                                                                                             | 15407 (0.036)                                                                                          |
| R <sub>1</sub> (observed)                       | 0.0346                                                                                                                                                    | 0.0345                                                                                                 |
| wR <sub>2</sub> (all data) <sup>[b]</sup>       | 0.0611                                                                                                                                                    | 0.0642                                                                                                 |

$$^{[a]} I = I > 2\sigma(I). \quad ^{[b]} wR_2 = \{\sigma[w(F_0^2 - F_c^2)^2]/\sigma[w(F_0^2)^2]\}^{1/2}.$$

### Discussion of Energetics of dimerization

A full CI treatment of all the electrons in such large systems will be required to accurately model the dispersive interactions responsible. We hope to have these results ready for a full-paper on this subject, via collaboration with our colleague Dr Joe MacDouall, but in lieu of this at present, and at the request of referees, it is possible to comment using simple electrostatics, literature values from analogous systems, and relatively inexpensive single-point calculations (9 hours on a PC) using the crystallographic geometry.

Using the graphical user interface Gaussview,<sup>5</sup> co-ordinates obtained from crystallographic cif files were input, minus anions and solvents of crystallization, to single-point energy calculations using Gaussian 09.<sup>6</sup> Both monomer cation and dimer dication crystallographic geometries were subjected to this total energy computation, at both Hartree-Fock-Self-Consistent Field (HF-SCF) and Density Functional (DF) levels, in both cases using a LANL2-DZ basis. It should be noted that Hartree-Fock contains no treatment of configuration interaction (CI), and DF contains only an indirect treatment of it. Accurate energies will have to wait for full all-electron treatments with CI. However, as a means to estimate the approximate charge on Tl<sup>+</sup>, in order to scale our estimates of coulombic repulsion, these methods should be adequate. To this end, we employed a Natural Population Analysis of charges,<sup>7</sup> which is known to give more realistic results than the crude Mulliken charge analysis, though both sets of data are presented for the reader. The results of these calculations are presented here as Table 2, and in the main text as table 1.

**Table 2.** Summary of computational results.

|                 | Tl <sub>q(M)</sub> | Tl <sub>q(NPA)</sub> | Energy<br>/Hartrees | ΔE <sub>D</sub><br>/kcal mol <sup>-1</sup> |
|-----------------|--------------------|----------------------|---------------------|--------------------------------------------|
| <b>HF-SCF</b>   |                    |                      |                     | + 47.4                                     |
| Monomer         | 0.82               | 0.94                 | -1524.6289          |                                            |
| Dimer           | 0.84               | 0.87                 | -3049.18217         |                                            |
| <b>DF-B3LYP</b> |                    |                      |                     | +39.9                                      |
| Monomer         | 0.70               | 0.90                 | -1536.06077         |                                            |
| Dimer           | 0.65               | 0.82                 | -3072.05798         |                                            |

Basis set: LANL2-DZ. Tl<sub>q(M)</sub> = Mulliken charge on Tl; Tl<sub>q(NPA)</sub> = Natural Population Analysis charge on Tl; ΔE<sub>D</sub> = energy of dimerization, i.e. 2 x monomer energy – dimer energy.

The NPA charges are higher than the Mulliken charges, clustering around +0.9 across the methods and monomer/dimer range. They are systematically lower for dimer than for monomer, indicating the effect of π-aryl co-ordination, in all cases except the Mulliken DF-B3LYP case. This underlines the superiority of NPA charge analysis.<sup>7</sup> Taking the most conservative NPA estimate of true “Tl<sup>+</sup>” charge, +0.82, the electrostatic repulsion between two such charges at the experimental Tl-Tl distance of 3.64 Å is calculated to be + 61.76 kcal mol<sup>-1</sup>. The

computed dimerization energies of the cation from **1** are +40 (B3-LYP) and +47 (SCF) kcal mol<sup>-1</sup>. These smaller values (22 {B3-LYP} and 25{SCF} kcal mol<sup>-1</sup> decreases) reflect the favourable effect of TI-aryl interaction, which is modelled by these two methods. If one fully ascribes the decrease in repulsion to the effect of TI-aryl attraction, this places a value of -11 to -12.5 kcal mol<sup>-1</sup> per aryl, since there are two such interactions per dimer. This value lies within the lower part of the range found by others for such interactions.<sup>8</sup> However, these widely-used methods still fail to predict the formation of these dimers by some considerable margin. This failure is partially because of the single-point nature of the calculations, and partly because of the inability of SCF to model configuration interaction effects, only partially recovered by DF-B3LYP. Current understanding ascribes less than 10 kcal mol<sup>-1</sup> to TI-TI attraction,<sup>9</sup> which leaves over 30 kcal mol<sup>-1</sup> unaccounted for. The issue is ripe for investigation at the highest levels of theory not available to our computational resources. Either the assessment of the strength of TI-TI interactions is too low, the summation of multiple other small dispersive interactions in the crystal is unusually high in aggregate, or our dismissal of cation-diffuse anion interactions at distances approaching 6 Å is in error.

- 1 D. Barnes, G. L. Brown, M. Brownhill, I. German, C. J. Herbert, A. Jolleys, A. R. Kennedy, B. Liu, K. McBride, F. S. Mair, R. G. Pritchard, A. Sanders, J. E. Warren, *Eur. J. Inorg. Chem.* 2009, 1219.
- 2 H. Nishida, N. Takada, M. Yoshimura, *Bull. Chem. Soc. Jpn.* 1984, **57**, 2600.
- 3 *CrysAlis PRO and CrysAlis RED*, Oxford Diffraction Ltd, Abingdon, UK, 2007.
- 4 G. M. Sheldrick, *Acta Crystallogr., Sect. A: Found. Crystallogr.* 2008, **A64**, 112.
- 5 *GaussView, Version 5*, R. Dennington, T. Keith and J. Millam, *Semichem Inc.*, Shawnee Mission KS, 2009.
- 6 *Gaussian 09, Revision B.01*, M. J. Frisch, G. W. Trucks, H. B. Schlegel, G. E. Scuseria, M. A. Robb, J. R. Cheeseman, G. Scalmani, V. Barone, B. Mennucci, G. A. Petersson, H. Nakatsuji, M. Caricato, X. Li, H. P. Hratchian, A. F. Izmaylov, J. Bloino, G. Zheng, J. L. Sonnenberg, M. Hada, M. Ehara, K. Toyota, R. Fukuda, J. Hasegawa, M. Ishida, T. Nakajima, Y. Honda, O. Kitao, H. Nakai, T. Vreven, J. A. Montgomery, Jr., J. E. Peralta, F. Ogliaro, M. Bearpark, J. J. Heyd, E. Brothers, K. N. Kudin, V. N. Staroverov, T. Keith, R. Kobayashi, J. Normand, K. Raghavachari, A. Rendell, J. C. Burant, S. S. Iyengar, J. Tomasi, M. Cossi, N. Rega, J. M. Millam, M. Klene, J. E. Knox, J. B. Cross, V. Bakken, C. Adamo, J. Jaramillo, R. Gomperts, R. E. Stratmann, O. Yazyev, A. J. Austin, R. Cammi, C. Pomelli, J. W. Ochterski, R. L. Martin, K. Morokuma, V. G. Zakrzewski, G. A. Voth, P. Salvador, J. J. Dannenberg, S. Dapprich, A. D. Daniels, O. Farkas, J. B. Foresman, J. V. Ortiz, J. Cioslowski, and D. J. Fox, *Gaussian, Inc.*, Wallingford CT, 2010.
- 7 A. E. Reed, R. B. Weinstock, F. Weinhold, *J. Chem. Phys.* 1985, **83**, 735–746.
- 8 T. Auel, E. L. Amma, *J. Am. Chem. Soc.*, 1968, **90**, 5941; H. Schmidbaur, W. Bublak, J. Riede, G. Müller, *Angew. Chem., Int. Ed. Engl.* 1985, **24**, 414; *Angew. Chem.* 1985, **97**, 402. Y. Sarazin, D. L. Hughes, N. Kaltsoyannis, J. A. Wright, M. Bochmann, *J. Am. Chem. Soc.* 2007, **129**, 881; Y. Sarazin, N. Kaltsoyannis, J. A. Wright, M. Bochmann, *Organometallics* 2007, **26**, 1881;
- 9 P. Pyykkö, M. Straka, T. Tamm, *Phys. Chem. Chem. Phys.* 1999, **1**, 3441; H. Schumann, C. Janiak, M. A. Khan and J. J. Zuckermann, *J. Organomet. Chem.* 1988, **354**, 7.

**Appendix 1. Gaussian output for cation monomer, LANL2-DZ, HF-SCF.**

Entering Link 1 = C:\G09W\l1.exe PID= 5392.

Copyright (c) 1988,1990,1992,1993,1995,1998,2003,2009,2010,  
Gaussian, Inc. All Rights Reserved.

This is part of the Gaussian(R) 09 program. It is based on the Gaussian(R) 03 system (copyright 2003, Gaussian, Inc.), the Gaussian(R) 98 system (copyright 1998, Gaussian, Inc.), the Gaussian(R) 94 system (copyright 1995, Gaussian, Inc.), the Gaussian 92(TM) system (copyright 1992, Gaussian, Inc.), the Gaussian 90(TM) system (copyright 1990, Gaussian, Inc.), the Gaussian 88(TM) system (copyright 1988, Gaussian, Inc.), the Gaussian 86(TM) system (copyright 1986, Carnegie Mellon University), and the Gaussian 82(TM) system (copyright 1983, Carnegie Mellon University). Gaussian is a federally registered trademark of Gaussian, Inc.

This software contains proprietary and confidential information, including trade secrets, belonging to Gaussian, Inc.

This software is provided under written license and may be used, copied, transmitted, or stored only in accord with that written license.

The following legend is applicable only to US Government contracts under FAR:

**RESTRICTED RIGHTS LEGEND**

Use, reproduction and disclosure by the US Government is subject to restrictions as set forth in subparagraphs (a) and (c) of the Commercial Computer Software - Restricted Rights clause in FAR 52.227-19.

Gaussian, Inc.  
340 Quinipiac St., Bldg. 40, Wallingford CT 06492

-----  
Warning -- This program may not be used in any manner that competes with the business of Gaussian, Inc. or will provide assistance to any competitor of Gaussian, Inc. The licensee of this program is prohibited from giving any competitor of Gaussian, Inc. access to this program. By using this program, the user acknowledges that Gaussian, Inc. is engaged in the business of creating and licensing software in the field of computational chemistry and represents and warrants to the licensee that it is not a competitor of Gaussian, Inc. and that it will not use this program in any manner prohibited above.  
-----

Cite this work as:

Gaussian 09, Revision B.01,  
M. J. Frisch, G. W. Trucks, H. B. Schlegel, G. E. Scuseria,  
M. A. Robb, J. R. Cheeseman, G. Scalmani, V. Barone, B. Mennucci,  
G. A. Petersson, H. Nakatsuji, M. Caricato, X. Li, H. P. Hratchian,  
A. F. Izmaylov, J. Bloino, G. Zheng, J. L. Sonnenberg, M. Hada,  
M. Ehara, K. Toyota, R. Fukuda, J. Hasegawa, M. Ishida, T. Nakajima,  
Y. Honda, O. Kitao, H. Nakai, T. Vreven, J. A. Montgomery, Jr.,  
J. E. Peralta, F. Ogliaro, M. Bearpark, J. J. Heyd, E. Brothers,

K. N. Kudin, V. N. Staroverov, T. Keith, R. Kobayashi, J. Normand,  
K. Raghavachari, A. Rendell, J. C. Burant, S. S. Iyengar, J. Tomasi,  
M. Cossi, N. Rega, J. M. Millam, M. Klene, J. E. Knox, J. B. Cross,  
V. Bakken, C. Adamo, J. Jaramillo, R. Gomperts, R. E. Stratmann,  
O. Yazyev, A. J. Austin, R. Cammi, C. Pomelli, J. W. Ochterski,  
R. L. Martin, K. Morokuma, V. G. Zakrzewski, G. A. Voth,  
P. Salvador, J. J. Dannenberg, S. Dapprich, A. D. Daniels,  
O. Farkas, J. B. Foresman, J. V. Ortiz, J. Cioslowski,  
and D. J. Fox, Gaussian, Inc., Wallingford CT, 2010.

\*\*\*\*\*

Gaussian 09: IA32W-G09RevB.01 12-Aug-2010  
15-Jan-2013

\*\*\*\*\*

%chk=\\vdm09-g1.ds.man.ac.uk\HOME\Desktop\cationOnly\_1\_1.chk

-----  
# rhf/lanl2dz pop=npa geom=connectivity

-----  
1/38=1,57=2/1;  
2/12=2,17=6,18=5,40=1/2;  
3/5=6,6=3,11=1,16=1,25=1,30=1,116=1/1,2,3;  
4//1;  
5/5=2,38=5/2;  
6/7=2,8=2,9=2,10=2,28=1,40=-1/1,7;  
99/5=1,9=1/99;

-----  
single-Point XRD Monomer

-----  
Symbolic Z-matrix:

Charge = 1 Multiplicity = 1

|   |         |         |         |
|---|---------|---------|---------|
| C | -0.6205 | 11.0173 | 13.3488 |
| H | -1.1772 | 10.346  | 12.9002 |
| C | -0.7386 | 10.7853 | 14.8523 |
| C | -2.0146 | 10.1478 | 15.2951 |
| H | -2.0164 | 10.0668 | 16.2521 |
| H | -2.0905 | 9.2752  | 14.9004 |
| H | -2.7571 | 10.6899 | 15.0181 |
| C | 0.1477  | 11.0887 | 17.0133 |
| C | 0.985   | 10.2079 | 17.6933 |
| C | 0.9712  | 10.2682 | 19.0865 |
| C | 0.1757  | 11.1851 | 19.7698 |
| C | -0.6272 | 12.0471 | 19.0766 |
| C | -0.643  | 11.9981 | 17.6933 |
| C | 1.8192  | 9.1837  | 16.9669 |
| C | 1.2049  | 7.8117  | 17.0863 |
| H | 1.2187  | 7.5343  | 18.0051 |
| H | 1.706   | 7.1888  | 16.5556 |
| H | 0.2964  | 7.8403  | 16.7745 |
| C | 3.2525  | 9.155   | 17.4114 |
| H | 3.6438  | 10.0232 | 17.287  |
| H | 3.7359  | 8.5075  | 16.8939 |
| H | 3.2939  | 8.9159  | 18.3418 |
| C | -1.123  | 12.3888 | 12.9283 |
| C | -1.6827 | 12.4638 | 11.5534 |
| H | -1.9518 | 13.3661 | 11.366  |
| H | -2.4428 | 11.8816 | 11.4854 |
| H | -1.0127 | 12.193  | 10.9198 |
| C | -1.289  | 14.7012 | 13.3745 |
| C | -2.2986 | 15.3891 | 14.0528 |
| C | -2.4429 | 16.7341 | 13.6979 |
| C | -1.6719 | 17.3532 | 12.804  |
| C | -0.6563 | 16.6662 | 12.1604 |

|    |         |         |         |
|----|---------|---------|---------|
| C  | -0.4748 | 15.3276 | 12.454  |
| C  | -3.1018 | 14.7409 | 15.1408 |
| C  | -4.5972 | 15.0605 | 15.0712 |
| H  | -4.7206 | 16.0118 | 15.0513 |
| H  | -5.0382 | 14.6958 | 15.8407 |
| H  | -4.9686 | 14.6725 | 14.2751 |
| C  | -2.5564 | 15.1673 | 16.5058 |
| H  | -1.6294 | 14.924  | 16.5705 |
| H  | -3.0515 | 14.7244 | 17.2008 |
| H  | -2.6467 | 16.1173 | 16.6053 |
| C  | 0.8149  | 10.8036 | 12.8925 |
| C  | 1.185   | 9.3929  | 12.5668 |
| H  | 2.0832  | 9.368   | 12.2268 |
| H  | 0.5821  | 9.0478  | 11.905  |
| H  | 1.1288  | 8.8555  | 13.3612 |
| C  | 2.9692  | 11.7205 | 12.532  |
| C  | 3.4312  | 12.2928 | 11.3444 |
| C  | 4.8043  | 12.3003 | 11.1454 |
| C  | 5.6765  | 11.7802 | 12.0742 |
| C  | 5.2031  | 11.2058 | 13.2236 |
| C  | 3.8453  | 11.1763 | 13.4607 |
| C  | 2.4476  | 12.825  | 10.3294 |
| C  | 1.935   | 11.6972 | 9.4454  |
| H  | 2.6628  | 11.3347 | 8.9346  |
| H  | 1.2641  | 12.0378 | 8.8483  |
| H  | 1.5553  | 11.0076 | 9.9944  |
| C  | 3.0076  | 13.9575 | 9.4603  |
| H  | 3.4149  | 14.6201 | 10.0242 |
| H  | 2.2939  | 14.3599 | 8.9595  |
| H  | 3.6632  | 13.6032 | 8.8566  |
| H  | 1.5376  | 9.6958  | 19.6056 |
| H  | 0.2777  | 11.1745 | 20.6986 |
| H  | -1.0785 | 12.5752 | 19.405  |
| H  | -1.1085 | 12.6356 | 17.1991 |
| H  | 1.9153  | 9.4051  | 16.0879 |
| H  | -3.0335 | 17.0782 | 14.2137 |
| H  | -1.6683 | 18.2598 | 12.5386 |
| H  | -0.1278 | 17.0116 | 11.5932 |
| H  | 0.1761  | 14.8424 | 12.0377 |
| H  | -3.0473 | 13.7776 | 15.0745 |
| H  | 5.2053  | 12.7076 | 10.3908 |
| H  | 6.5357  | 11.8968 | 11.8254 |
| H  | 5.8118  | 10.8056 | 13.8323 |
| H  | 3.5609  | 10.7602 | 14.2303 |
| H  | 1.6499  | 13.1539 | 10.8187 |
| N  | 0.2136  | 11.175  | 15.584  |
| N  | -0.9939 | 13.3524 | 13.7507 |
| N  | 1.5756  | 11.8102 | 12.8487 |
| Tl | 1.3934  | 13.5394 | 14.8375 |

Stoichiometry C<sub>34</sub>H<sub>43</sub>N<sub>3</sub>Tl(1+)

Framework group C1[X(C<sub>34</sub>H<sub>43</sub>N<sub>3</sub>Tl)]

Deg. of freedom 237

Full point group C1 NOp 1

Largest Abelian subgroup C1 NOp 1

Largest concise Abelian subgroup C1 NOp 1

Standard orientation:

| Center<br>Number | Atomic<br>Number | Atomic<br>Type | Coordinates (Angstroms) |           |          |
|------------------|------------------|----------------|-------------------------|-----------|----------|
|                  |                  |                | X                       | Y         | Z        |
| 1                | 6                | 0              | 0.018610                | -0.083509 | 2.255965 |

|    |   |   |           |           |           |
|----|---|---|-----------|-----------|-----------|
| 2  | 1 | 0 | 0.004563  | -0.122705 | 3.235795  |
| 3  | 6 | 0 | 1.475694  | 0.037251  | 1.819378  |
| 4  | 6 | 0 | 2.383293  | 0.678773  | 2.817058  |
| 5  | 1 | 0 | 3.268910  | 0.740388  | 2.450589  |
| 6  | 1 | 0 | 2.404998  | 0.148404  | 3.617819  |
| 7  | 1 | 0 | 2.060674  | 1.558898  | 3.024916  |
| 8  | 6 | 0 | 3.100261  | -0.209698 | 0.131984  |
| 9  | 6 | 0 | 3.901979  | -1.327516 | -0.084833 |
| 10 | 6 | 0 | 5.120320  | -1.118172 | -0.730319 |
| 11 | 6 | 0 | 5.509287  | 0.147439  | -1.163167 |
| 12 | 6 | 0 | 4.696747  | 1.225405  | -0.948720 |
| 13 | 6 | 0 | 3.488421  | 1.047147  | -0.297304 |
| 14 | 6 | 0 | 3.511043  | -2.694884 | 0.415175  |
| 15 | 6 | 0 | 4.301631  | -3.060222 | 1.646233  |
| 16 | 1 | 0 | 5.230767  | -3.137415 | 1.418018  |
| 17 | 1 | 0 | 3.985941  | -3.897280 | 1.993251  |
| 18 | 1 | 0 | 4.191528  | -2.375482 | 2.311377  |
| 19 | 6 | 0 | 3.635796  | -3.770424 | -0.624249 |
| 20 | 1 | 0 | 3.091520  | -3.546877 | -1.383296 |
| 21 | 1 | 0 | 3.345446  | -4.607581 | -0.256005 |
| 22 | 1 | 0 | 4.554096  | -3.843778 | -0.899697 |
| 23 | 6 | 0 | -0.819518 | 1.110863  | 1.830107  |
| 24 | 6 | 0 | -1.963955 | 1.431667  | 2.722624  |
| 25 | 1 | 0 | -2.448030 | 2.180175  | 2.366134  |
| 26 | 1 | 0 | -1.635595 | 1.649364  | 3.597907  |
| 27 | 1 | 0 | -2.549087 | 0.671305  | 2.778766  |
| 28 | 6 | 0 | -1.338571 | 2.731076  | 0.193238  |
| 29 | 6 | 0 | -0.817831 | 4.019156  | 0.044002  |
| 30 | 6 | 0 | -1.657345 | 4.927439  | -0.608713 |
| 31 | 6 | 0 | -2.859380 | 4.613055  | -1.091473 |
| 32 | 6 | 0 | -3.350780 | 3.324906  | -0.961731 |
| 33 | 6 | 0 | -2.575807 | 2.384734  | -0.308671 |
| 34 | 6 | 0 | 0.575307  | 4.362779  | 0.480037  |
| 35 | 6 | 0 | 0.677188  | 5.710898  | 1.197953  |
| 36 | 1 | 0 | 0.293384  | 6.396553  | 0.647347  |
| 37 | 1 | 0 | 1.598956  | 5.913988  | 1.367410  |
| 38 | 1 | 0 | 0.200933  | 5.664574  | 2.030595  |
| 39 | 6 | 0 | 1.507967  | 4.364168  | -0.733490 |
| 40 | 1 | 0 | 1.482544  | 3.502822  | -1.157927 |
| 41 | 1 | 0 | 2.406176  | 4.551802  | -0.446567 |
| 42 | 1 | 0 | 1.224468  | 5.037208  | -1.355743 |
| 43 | 6 | 0 | -0.583107 | -1.380062 | 1.735256  |
| 44 | 6 | 0 | -0.367113 | -2.582691 | 2.595582  |
| 45 | 1 | 0 | -0.836795 | -3.332532 | 2.221255  |
| 46 | 1 | 0 | -0.695737 | -2.407635 | 3.479846  |
| 47 | 1 | 0 | 0.571789  | -2.782032 | 2.637478  |
| 48 | 6 | 0 | -1.705379 | -2.517673 | -0.013464 |
| 49 | 6 | 0 | -3.088728 | -2.656069 | -0.149691 |
| 50 | 6 | 0 | -3.539864 | -3.736897 | -0.893565 |
| 51 | 6 | 0 | -2.671563 | -4.628305 | -1.481231 |
| 52 | 6 | 0 | -1.319113 | -4.486814 | -1.319917 |
| 53 | 6 | 0 | -0.828045 | -3.427120 | -0.587380 |
| 54 | 6 | 0 | -4.016761 | -1.680893 | 0.534937  |
| 55 | 6 | 0 | -4.239789 | -2.088872 | 1.984061  |
| 56 | 1 | 0 | -4.689360 | -2.936869 | 2.012404  |
| 57 | 1 | 0 | -4.778820 | -1.426662 | 2.424024  |
| 58 | 1 | 0 | -3.393081 | -2.161062 | 2.430149  |
| 59 | 6 | 0 | -5.365800 | -1.509395 | -0.173705 |
| 60 | 1 | 0 | -5.216056 | -1.346681 | -1.108593 |
| 61 | 1 | 0 | -5.836015 | -0.764442 | 0.208441  |
| 62 | 1 | 0 | -5.887201 | -2.307161 | -0.066446 |
| 63 | 1 | 0 | 5.705659  | -1.852907 | -0.918624 |

|    |    |   |           |           |           |
|----|----|---|-----------|-----------|-----------|
| 64 | 1  | 0 | 6.320426  | 0.169319  | -1.626590 |
| 65 | 1  | 0 | 4.861412  | 1.941492  | -1.173468 |
| 66 | 1  | 0 | 2.878627  | 1.747231  | -0.224064 |
| 67 | 1  | 0 | 2.618643  | -2.733005 | 0.597007  |
| 68 | 1  | 0 | -1.222838 | 5.658391  | -0.709589 |
| 69 | 1  | 0 | -3.468463 | 5.144209  | -1.580622 |
| 70 | 1  | 0 | -4.101781 | 3.065483  | -1.260104 |
| 71 | 1  | 0 | -2.875714 | 1.530752  | -0.193932 |
| 72 | 1  | 0 | 0.900886  | 3.712996  | 1.118076  |
| 73 | 1  | 0 | -4.457959 | -3.880782 | -1.073882 |
| 74 | 1  | 0 | -3.110430 | -5.249296 | -1.966502 |
| 75 | 1  | 0 | -0.733023 | -5.136672 | -1.687849 |
| 76 | 1  | 0 | 0.084013  | -3.377206 | -0.477995 |
| 77 | 1  | 0 | -3.558752 | -0.802221 | 0.580520  |
| 78 | 7  | 0 | 1.779334  | -0.372228 | 0.664361  |
| 79 | 7  | 0 | -0.508284 | 1.706202  | 0.748331  |
| 80 | 7  | 0 | -1.185303 | -1.346835 | 0.626165  |
| 81 | 81 | 0 | -0.088425 | 0.101083  | -1.291919 |

Rotational constants (GHZ): 0.0954184 0.0934007 0.0606679

Standard basis: LANL2DZ (5D, 7F)

There are 437 symmetry adapted basis functions of A symmetry.

Integral buffers will be 262144 words long.

Raffenetti 1 integral format.

Two-electron integral symmetry is turned on.

437 basis functions, 1127 primitive gaussians, 439 cartesian basis functions

140 alpha electrons 140 beta electrons

nuclear repulsion energy 4616.8692399665 Hartrees.

NAtoms= 81 NActive= 81 NUniq= 81 SFac= 1.00D+00 NatFMM= 50 NAOKFM=T Big=T

One-electron integrals computed using PRISM.

1 Symmetry operations used in ECPInt.

ECPInt: NShTT= 38503 NPrTT= 272384 LenC2= 34176 LenP2D= 128614.

LDataN: DoStor=T MaxTD1= 6 Len= 172

NBasis= 437 RedAO= T NBF= 437

NBsUse= 437 1.00D-06 NBFU= 437

Harris functional with IExCor= 205 diagonalized for initial guess.

ExpMin= 4.44D-02 ExpMax= 5.91D+03 ExpMxC= 2.05D+02 IAcc=2 IRadAn= 0 AccDes= 0.00D+00

HarFok: IExCor= 205 AccDes= 0.00D+00 IRadAn= 0 IDoV= 1

ScaDFX= 1.000000 1.000000 1.000000 1.000000

Defaulting to unpruned grid for atomic number 81.

FoFCou: FMM=F IPFlag= 0 FMFlag= 100000 FMFlg1= 2001

NFxFlg= 0 DoJE=T BraDBF=F KetDBF=T FulRan=T

Omega= 0.000000 0.000000 1.000000 0.000000 0.000000 ICntrl= 500 IOpCl= 0

NMat0= 1 NMatS0= 1 NMatT0= 0 NMatD0= 1 NMtDS0= 0 NMtDT0= 0

IICent= 4 NGrid= 0.

Petite list used in FoFCou.

Initial guess orbital symmetries:

Occupied (A) (A)

(A) (A) (A) (A) (A) (A) (A) (A) (A) (A) (A) (A) (A)

(A) (A) (A) (A) (A) (A) (A) (A) (A) (A) (A) (A) (A)

(A) (A) (A) (A) (A) (A) (A) (A) (A) (A) (A) (A) (A)

(A) (A) (A) (A) (A) (A) (A) (A) (A) (A) (A) (A) (A)

(A) (A) (A) (A) (A) (A) (A) (A) (A) (A) (A) (A) (A)

(A) (A) (A) (A) (A) (A) (A) (A) (A) (A) (A) (A) (A)

(A) (A) (A) (A) (A) (A) (A) (A) (A) (A) (A) (A) (A)

(A) (A) (A) (A) (A) (A) (A) (A) (A) (A) (A) (A) (A)

(A) (A) (A) (A) (A) (A) (A) (A) (A) (A) (A) (A) (A)

(A) (A) (A) (A) (A) (A) (A) (A) (A) (A) (A) (A) (A)

(A) (A) (A) (A) (A) (A) (A) (A) (A) (A) (A) (A) (A)

Virtual (A) (A)

(A) (A) (A) (A) (A) (A) (A) (A) (A) (A) (A) (A) (A)

(A) (A) (A) (A) (A) (A) (A) (A) (A) (A) (A) (A) (A)





(A) (A) (A) (A) (A) (A) (A) (A) (A) (A) (A) (A) (A)  
(A) (A) (A) (A) (A) (A) (A) (A) (A) (A) (A) (A) (A)  
(A) (A) (A) (A) (A) (A) (A) (A) (A) (A) (A) (A) (A)  
(A) (A) (A) (A) (A) (A) (A) (A) (A) (A) (A) (A) (A)  
(A) (A) (A) (A) (A) (A) (A) (A) (A) (A) (A) (A) (A)  
(A) (A) (A) (A) (A) (A) (A) (A) (A) (A) (A) (A) (A)  
(A) (A) (A) (A) (A) (A) (A) (A) (A) (A) (A) (A) (A)  
(A) (A) (A) (A) (A) (A) (A) (A) (A) (A) (A) (A) (A)  
(A) (A) (A) (A) (A) (A) (A) (A) (A) (A) (A) (A) (A)  
(A) (A) (A) (A) (A) (A) (A) (A) (A) (A) (A) (A) (A)  
(A) (A) (A) (A) (A) (A) (A) (A) (A) (A) (A) (A) (A)  
(A) (A) (A) (A) (A) (A) (A) (A) (A) (A) (A) (A) (A)  
(A) (A) (A) (A) (A) (A) (A) (A) (A) (A) (A) (A) (A)  
(A) (A) (A) (A) (A) (A) (A) (A) (A) (A) (A) (A) (A)

The electronic state is 1-A.

Alpha occ. eigenvalues -- -15.69545 -15.69285 -15.69101 -11.44334 -11.44223  
Alpha occ. eigenvalues -- -11.43735 -11.37944 -11.37357 -11.37327 -11.37219  
Alpha occ. eigenvalues -- -11.33977 -11.33753 -11.33514 -11.32479 -11.32064  
Alpha occ. eigenvalues -- -11.31928 -11.31902 -11.31387 -11.31285 -11.31262  
Alpha occ. eigenvalues -- -11.31260 -11.31103 -11.31100 -11.31068 -11.31060  
Alpha occ. eigenvalues -- -11.30857 -11.30792 -11.30619 -11.30582 -11.30572  
Alpha occ. eigenvalues -- -11.29419 -11.26193 -11.25949 -11.25591 -11.25401  
Alpha occ. eigenvalues -- -11.25323 -11.25024 -1.41927 -1.39225 -1.38938  
Alpha occ. eigenvalues -- -1.28124 -1.27090 -1.26666 -1.21741 -1.21054  
Alpha occ. eigenvalues -- -1.20509 -1.20309 -1.17484 -1.17114 -1.14115  
Alpha occ. eigenvalues -- -1.13713 -1.13025 -1.12749 -1.11977 -1.11663  
Alpha occ. eigenvalues -- -1.10627 -1.07323 -1.06999 -1.06985 -0.99357  
Alpha occ. eigenvalues -- -0.99083 -0.98373 -0.98132 -0.97720 -0.96418  
Alpha occ. eigenvalues -- -0.93971 -0.93813 -0.93556 -0.93541 -0.93330  
Alpha occ. eigenvalues -- -0.91881 -0.91737 -0.91528 -0.90574 -0.89648  
Alpha occ. eigenvalues -- -0.87661 -0.83521 -0.82815 -0.81142 -0.80511  
Alpha occ. eigenvalues -- -0.79922 -0.79492 -0.77967 -0.77832 -0.76928  
Alpha occ. eigenvalues -- -0.76663 -0.76349 -0.75988 -0.75099 -0.74892  
Alpha occ. eigenvalues -- -0.74232 -0.73834 -0.73399 -0.72880 -0.72734  
Alpha occ. eigenvalues -- -0.72427 -0.72202 -0.72082 -0.71584 -0.71145  
Alpha occ. eigenvalues -- -0.70201 -0.68661 -0.68591 -0.68470 -0.68152  
Alpha occ. eigenvalues -- -0.67660 -0.67445 -0.66973 -0.66730 -0.66665  
Alpha occ. eigenvalues -- -0.65740 -0.65367 -0.64690 -0.63686 -0.63224  
Alpha occ. eigenvalues -- -0.62087 -0.61281 -0.60909 -0.59962 -0.59119  
Alpha occ. eigenvalues -- -0.58794 -0.58367 -0.57466 -0.57360 -0.57085  
Alpha occ. eigenvalues -- -0.56855 -0.56291 -0.56121 -0.55100 -0.55014  
Alpha occ. eigenvalues -- -0.53526 -0.53186 -0.53081 -0.45946 -0.43689  
Alpha occ. eigenvalues -- -0.43298 -0.42519 -0.41720 -0.41446 -0.41255  
Alpha virt. eigenvalues -- -0.02736 -0.02372 -0.00452 0.01295 0.01504  
Alpha virt. eigenvalues -- 0.03098 0.03794 0.03870 0.03966 0.05549  
Alpha virt. eigenvalues -- 0.05978 0.06600 0.11562 0.11930 0.12774  
Alpha virt. eigenvalues -- 0.13722 0.14395 0.14422 0.16184 0.16612  
Alpha virt. eigenvalues -- 0.16863 0.17218 0.17642 0.18091 0.18348  
Alpha virt. eigenvalues -- 0.18696 0.18880 0.19058 0.19499 0.19565  
Alpha virt. eigenvalues -- 0.19928 0.20146 0.20311 0.20908 0.21213  
Alpha virt. eigenvalues -- 0.21740 0.22049 0.22250 0.22456 0.22849  
Alpha virt. eigenvalues -- 0.23141 0.23363 0.23832 0.23875 0.24281  
Alpha virt. eigenvalues -- 0.24565 0.24890 0.25247 0.25392 0.25560  
Alpha virt. eigenvalues -- 0.26377 0.27100 0.27309 0.27702 0.28159  
Alpha virt. eigenvalues -- 0.28739 0.28842 0.29696 0.29806 0.30299  
Alpha virt. eigenvalues -- 0.30742 0.31244 0.31522 0.31778 0.31966  
Alpha virt. eigenvalues -- 0.32312 0.33151 0.33385 0.34016 0.34154  
Alpha virt. eigenvalues -- 0.34673 0.34779 0.35086 0.35281 0.35514  
Alpha virt. eigenvalues -- 0.36047 0.36135 0.36621 0.37009 0.37104  
Alpha virt. eigenvalues -- 0.38370 0.38382 0.38949 0.39181 0.39305  
Alpha virt. eigenvalues -- 0.39500 0.39885 0.40070 0.40177 0.40630  
Alpha virt. eigenvalues -- 0.40916 0.41405 0.41631 0.41905 0.42286  
Alpha virt. eigenvalues -- 0.42513 0.42735 0.43150 0.43948 0.44300

|                            |         |          |         |         |         |
|----------------------------|---------|----------|---------|---------|---------|
| Alpha virt. eigenvalues -- | 0.44547 | 0.45218  | 0.45458 | 0.45982 | 0.46454 |
| Alpha virt. eigenvalues -- | 0.46649 | 0.46757  | 0.47255 | 0.47571 | 0.48182 |
| Alpha virt. eigenvalues -- | 0.48561 | 0.48734  | 0.48913 | 0.49184 | 0.50141 |
| Alpha virt. eigenvalues -- | 0.50355 | 0.50661  | 0.51151 | 0.51420 | 0.51739 |
| Alpha virt. eigenvalues -- | 0.52270 | 0.52466  | 0.52729 | 0.53259 | 0.53498 |
| Alpha virt. eigenvalues -- | 0.53976 | 0.54228  | 0.54569 | 0.55183 | 0.55344 |
| Alpha virt. eigenvalues -- | 0.55793 | 0.55947  | 0.56197 | 0.56838 | 0.57395 |
| Alpha virt. eigenvalues -- | 0.58106 | 0.58454  | 0.58770 | 0.59335 | 0.59673 |
| Alpha virt. eigenvalues -- | 0.60028 | 0.60252  | 0.60920 | 0.61373 | 0.61910 |
| Alpha virt. eigenvalues -- | 0.62093 | 0.62406  | 0.63021 | 0.63317 | 0.63686 |
| Alpha virt. eigenvalues -- | 0.63894 | 0.64574  | 0.65034 | 0.65305 | 0.65509 |
| Alpha virt. eigenvalues -- | 0.66736 | 0.67001  | 0.67135 | 0.67858 | 0.68215 |
| Alpha virt. eigenvalues -- | 0.69072 | 0.69173  | 0.69894 | 0.70818 | 0.71558 |
| Alpha virt. eigenvalues -- | 0.71933 | 0.72435  | 0.72933 | 0.73266 | 0.74107 |
| Alpha virt. eigenvalues -- | 0.74307 | 0.74901  | 0.75413 | 0.75824 | 0.76353 |
| Alpha virt. eigenvalues -- | 0.77226 | 0.77709  | 0.77920 | 0.78343 | 0.78798 |
| Alpha virt. eigenvalues -- | 0.79022 | 0.80260  | 0.81273 | 0.81736 | 0.82644 |
| Alpha virt. eigenvalues -- | 0.83736 | 0.84433  | 0.85352 | 0.86764 | 0.86915 |
| Alpha virt. eigenvalues -- | 0.88273 | 0.89170  | 0.90176 | 0.90595 | 0.91465 |
| Alpha virt. eigenvalues -- | 0.93717 | 0.94819  | 0.95354 | 0.95968 | 0.96578 |
| Alpha virt. eigenvalues -- | 0.97356 | 0.98828  | 1.00323 | 1.00829 | 1.01930 |
| Alpha virt. eigenvalues -- | 1.04415 | 1.04479  | 1.05394 | 1.05939 | 1.13032 |
| Alpha virt. eigenvalues -- | 1.13831 | 1.14686  | 1.17587 | 1.18373 | 1.23972 |
| Alpha virt. eigenvalues -- | 1.24588 | 1.25440  | 1.26996 | 1.27585 | 1.27857 |
| Alpha virt. eigenvalues -- | 1.28825 | 1.31907  | 1.33103 | 1.34478 | 1.36889 |
| Alpha virt. eigenvalues -- | 1.37397 | 1.38345  | 1.39133 | 1.40599 | 1.42132 |
| Alpha virt. eigenvalues -- | 1.42695 | 1.43771  | 1.44109 | 1.44984 | 1.45663 |
| Alpha virt. eigenvalues -- | 1.45963 | 1.46506  | 1.47093 | 1.47675 | 1.48510 |
| Alpha virt. eigenvalues -- | 1.48962 | 1.49275  | 1.49960 | 1.50386 | 1.51142 |
| Alpha virt. eigenvalues -- | 1.51934 | 1.52118  | 1.52891 | 1.53755 | 1.54182 |
| Alpha virt. eigenvalues -- | 1.54510 | 1.54622  | 1.55066 | 1.56019 | 1.56282 |
| Alpha virt. eigenvalues -- | 1.56775 | 1.57257  | 1.58125 | 1.59143 | 1.59282 |
| Alpha virt. eigenvalues -- | 1.61028 | 1.61423  | 1.62270 | 1.62566 | 1.63915 |
| Alpha virt. eigenvalues -- | 1.64459 | 1.65200  | 1.65467 | 1.66487 | 1.67284 |
| Alpha virt. eigenvalues -- | 1.68403 | 1.68864  | 1.69926 | 1.71444 | 1.73576 |
| Alpha virt. eigenvalues -- | 1.74680 | 1.76389  | 1.76662 | 1.77593 | 1.78656 |
| Alpha virt. eigenvalues -- | 1.80414 | 1.81018  | 1.82436 | 1.84041 | 1.85190 |
| Alpha virt. eigenvalues -- | 1.87574 | 1.88229  | 1.90183 | 1.92322 | 1.93228 |
| Alpha virt. eigenvalues -- | 1.94952 | 1.97738  | 2.05464 | 2.08247 | 2.09727 |
| Alpha virt. eigenvalues -- | 2.19730 | 10.97937 |         |         |         |

Condensed to atoms (all electrons):

Mulliken atomic charges:

1

|      |           |
|------|-----------|
| 1 C  | -0.266456 |
| 2 H  | 0.247055  |
| 3 C  | 0.225093  |
| 4 C  | -0.671943 |
| 5 H  | 0.269294  |
| 6 H  | 0.239787  |
| 7 H  | 0.236633  |
| 8 C  | 0.126187  |
| 9 C  | 0.243147  |
| 10 C | -0.364006 |
| 11 C | -0.280345 |
| 12 C | -0.389328 |
| 13 C | -0.362305 |
| 14 C | -0.207258 |
| 15 C | -0.599509 |
| 16 H | 0.209296  |
| 17 H | 0.201303  |
| 18 H | 0.190710  |
| 19 C | -0.615455 |

|    |    |           |
|----|----|-----------|
| 20 | H  | 0.200198  |
| 21 | H  | 0.203899  |
| 22 | H  | 0.199163  |
| 23 | C  | 0.248978  |
| 24 | C  | -0.681640 |
| 25 | H  | 0.269910  |
| 26 | H  | 0.245898  |
| 27 | H  | 0.239839  |
| 28 | C  | 0.129140  |
| 29 | C  | 0.180959  |
| 30 | C  | -0.327214 |
| 31 | C  | -0.258605 |
| 32 | C  | -0.316622 |
| 33 | C  | -0.413412 |
| 34 | C  | -0.214630 |
| 35 | C  | -0.610529 |
| 36 | H  | 0.197190  |
| 37 | H  | 0.208723  |
| 38 | H  | 0.207377  |
| 39 | C  | -0.601501 |
| 40 | H  | 0.190155  |
| 41 | H  | 0.202924  |
| 42 | H  | 0.212686  |
| 43 | C  | 0.239420  |
| 44 | C  | -0.674115 |
| 45 | H  | 0.267285  |
| 46 | H  | 0.240904  |
| 47 | H  | 0.241408  |
| 48 | C  | 0.162305  |
| 49 | C  | 0.207318  |
| 50 | C  | -0.350868 |
| 51 | C  | -0.284701 |
| 52 | C  | -0.241217 |
| 53 | C  | -0.390864 |
| 54 | C  | -0.181342 |
| 55 | C  | -0.605355 |
| 56 | H  | 0.217240  |
| 57 | H  | 0.207211  |
| 58 | H  | 0.185245  |
| 59 | C  | -0.628158 |
| 60 | H  | 0.209962  |
| 61 | H  | 0.210354  |
| 62 | H  | 0.200921  |
| 63 | H  | 0.261147  |
| 64 | H  | 0.268813  |
| 65 | H  | 0.431286  |
| 66 | H  | 0.280742  |
| 67 | H  | 0.217869  |
| 68 | H  | 0.313502  |
| 69 | H  | 0.263980  |
| 70 | H  | 0.340896  |
| 71 | H  | 0.303098  |
| 72 | H  | 0.198037  |
| 73 | H  | 0.267410  |
| 74 | H  | 0.291434  |
| 75 | H  | 0.265628  |
| 76 | H  | 0.305115  |
| 77 | H  | 0.180429  |
| 78 | N  | -0.442773 |
| 79 | N  | -0.465629 |
| 80 | N  | -0.478739 |
| 81 | Tl | 0.820015  |

Sum of Mulliken atomic charges = 1.00000

Mulliken charges with hydrogens summed into heavy atoms:

1

|       |           |
|-------|-----------|
| 1 C   | -0.019401 |
| 3 C   | 0.225093  |
| 4 C   | 0.073771  |
| 8 C   | 0.126187  |
| 9 C   | 0.243147  |
| 10 C  | -0.102859 |
| 11 C  | -0.011533 |
| 12 C  | 0.041958  |
| 13 C  | -0.081563 |
| 14 C  | 0.010610  |
| 15 C  | 0.001801  |
| 19 C  | -0.012195 |
| 23 C  | 0.248978  |
| 24 C  | 0.074007  |
| 28 C  | 0.129140  |
| 29 C  | 0.180959  |
| 30 C  | -0.013712 |
| 31 C  | 0.005376  |
| 32 C  | 0.024274  |
| 33 C  | -0.110314 |
| 34 C  | -0.016593 |
| 35 C  | 0.002761  |
| 39 C  | 0.004264  |
| 43 C  | 0.239420  |
| 44 C  | 0.075482  |
| 48 C  | 0.162305  |
| 49 C  | 0.207318  |
| 50 C  | -0.083458 |
| 51 C  | 0.006733  |
| 52 C  | 0.024411  |
| 53 C  | -0.085749 |
| 54 C  | -0.000913 |
| 55 C  | 0.004340  |
| 59 C  | -0.006921 |
| 78 N  | -0.442773 |
| 79 N  | -0.465629 |
| 80 N  | -0.478739 |
| 81 Tl | 0.820015  |

Sum of Mulliken charges with hydrogens summed into heavy atoms = 1.00000

Electronic spatial extent (au):  $\langle R^{*2} \rangle =$  18936.9244

Charge= 1.0000 electrons

Dipole moment (field-independent basis, Debye):

|    |         |    |         |    |        |      |        |
|----|---------|----|---------|----|--------|------|--------|
| X= | -0.5128 | Y= | -0.4836 | Z= | 4.8570 | Tot= | 4.9079 |
|----|---------|----|---------|----|--------|------|--------|

Quadrupole moment (field-independent basis, Debye-Ang):

|     |           |     |           |     |           |
|-----|-----------|-----|-----------|-----|-----------|
| XX= | -195.1178 | YY= | -196.9825 | ZZ= | -216.2439 |
| XY= | 1.2165    | XZ= | 0.7221    | YZ= | -0.6321   |

Traceless Quadrupole moment (field-independent basis, Debye-Ang):

|     |        |     |        |     |          |
|-----|--------|-----|--------|-----|----------|
| XX= | 7.6636 | YY= | 5.7989 | ZZ= | -13.4625 |
| XY= | 1.2165 | XZ= | 0.7221 | YZ= | -0.6321  |

Octapole moment (field-independent basis, Debye-Ang\*\*2):

|      |          |      |          |      |          |      |          |
|------|----------|------|----------|------|----------|------|----------|
| XXX= | -7.0397  | YYY= | 39.2490  | ZZZ= | -83.2349 | XYX= | -13.2635 |
| XXY= | -33.6174 | XXZ= | -93.8708 | XZZ= | -7.0497  | YYZ= | -0.2137  |
| YYZ= | -92.1043 | XYZ= | -0.7789  |      |          |      |          |

Hexadecapole moment (field-independent basis, Debye-Ang\*\*3):

|       |             |       |             |       |            |       |            |
|-------|-------------|-------|-------------|-------|------------|-------|------------|
| XXXX= | -10506.0357 | YYYY= | -10422.7625 | ZZZZ= | -2657.5802 | XXXY= | 3.2769     |
| XXXZ= | -146.3972   | YYXX= | 53.9765     | YYYZ= | 15.4714    | ZZZX= | 25.3350    |
| ZZZY= | -14.9586    | XXYY= | -3455.9526  | XXZZ= | -2328.5186 | YYZZ= | -2262.0642 |
| XXYZ= | -30.5064    | YYXZ= | 168.1106    | ZZXY= | 11.5951    |       |            |

N-N= 4.616869239966D+03 E-N=-1.277307290042D+04 KE= 1.521968359954D+03

\*\*\*\*\*Gaussian NBO Version 3.1\*\*\*\*\*

NATURAL ATOMIC ORBITAL AND  
NATURAL BOND ORBITAL ANALYSIS

\*\*\*\*\*Gaussian NBO Version 3.1\*\*\*\*\*

/RESON /: Allow strongly delocalized NBO set

Analyzing the SCF density

Job title: single-Point XRD Monomer

Storage needed: 593108 in NPA ( 33535799 available)

NATURAL POPULATIONS: Natural atomic orbital occupancies

| NAO | Atom | No | lang | Type(AO) | Occupancy | Energy    |
|-----|------|----|------|----------|-----------|-----------|
| 1   | C    | 1  | S    | Cor( 1S) | 1.99896   | -11.21738 |
| 2   | C    | 1  | S    | Val( 2S) | 0.96255   | -0.31219  |
| 3   | C    | 1  | S    | Ryd( 3S) | 0.00100   | 1.63271   |
| 4   | C    | 1  | px   | Val( 2p) | 1.07737   | -0.20803  |
| 5   | C    | 1  | px   | Ryd( 3p) | 0.00807   | 0.57089   |
| 6   | C    | 1  | py   | Val( 2p) | 1.07383   | -0.20718  |
| 7   | C    | 1  | py   | Ryd( 3p) | 0.00748   | 0.55266   |
| 8   | C    | 1  | pz   | Val( 2p) | 1.18308   | -0.16343  |
| 9   | C    | 1  | pz   | Ryd( 3p) | 0.02144   | 0.65750   |
| 10  | H    | 2  | S    | Val( 1S) | 0.79434   | 0.13612   |
| 11  | H    | 2  | S    | Ryd( 2S) | 0.00191   | 1.15690   |
| 12  | C    | 3  | S    | Cor( 1S) | 1.99916   | -11.29624 |
| 13  | C    | 3  | S    | Val( 2S) | 0.85968   | -0.24218  |
| 14  | C    | 3  | S    | Ryd( 3S) | 0.00596   | 1.15904   |
| 15  | C    | 3  | px   | Val( 2p) | 0.96022   | -0.14022  |
| 16  | C    | 3  | px   | Ryd( 3p) | 0.00816   | 0.70730   |
| 17  | C    | 3  | py   | Val( 2p) | 0.79030   | -0.13731  |
| 18  | C    | 3  | py   | Ryd( 3p) | 0.00914   | 0.58202   |
| 19  | C    | 3  | pz   | Val( 2p) | 0.87105   | -0.07736  |
| 20  | C    | 3  | pz   | Ryd( 3p) | 0.00732   | 0.62595   |
| 21  | C    | 4  | S    | Cor( 1S) | 1.99921   | -11.13375 |
| 22  | C    | 4  | S    | Val( 2S) | 1.02185   | -0.24205  |
| 23  | C    | 4  | S    | Ryd( 3S) | 0.00051   | 1.32559   |
| 24  | C    | 4  | px   | Val( 2p) | 1.18848   | -0.14567  |
| 25  | C    | 4  | px   | Ryd( 3p) | 0.00396   | 0.35355   |
| 26  | C    | 4  | py   | Val( 2p) | 1.19978   | -0.13893  |
| 27  | C    | 4  | py   | Ryd( 3p) | 0.00212   | 0.35801   |
| 28  | C    | 4  | pz   | Val( 2p) | 1.16897   | -0.14591  |
| 29  | C    | 4  | pz   | Ryd( 3p) | 0.00314   | 0.31548   |
| 30  | H    | 5  | S    | Val( 1S) | 0.78586   | 0.17085   |
| 31  | H    | 5  | S    | Ryd( 2S) | 0.00153   | 1.06392   |
| 32  | H    | 6  | S    | Val( 1S) | 0.79377   | 0.14916   |
| 33  | H    | 6  | S    | Ryd( 2S) | 0.00120   | 1.00152   |
| 34  | H    | 7  | S    | Val( 1S) | 0.79380   | 0.14750   |
| 35  | H    | 7  | S    | Ryd( 2S) | 0.00122   | 1.00289   |
| 36  | C    | 8  | S    | Cor( 1S) | 1.99890   | -11.22543 |
| 37  | C    | 8  | S    | Val( 2S) | 0.84327   | -0.16910  |
| 38  | C    | 8  | S    | Ryd( 3S) | 0.00199   | 1.31378   |

|    |   |    |    |          |         |           |
|----|---|----|----|----------|---------|-----------|
| 39 | C | 8  | px | Val( 2p) | 0.88265 | -0.06270  |
| 40 | C | 8  | px | Ryd( 3p) | 0.00908 | 0.72071   |
| 41 | C | 8  | py | Val( 2p) | 1.08277 | -0.12648  |
| 42 | C | 8  | py | Ryd( 3p) | 0.00547 | 0.63369   |
| 43 | C | 8  | pz | Val( 2p) | 1.02612 | -0.15413  |
| 44 | C | 8  | pz | Ryd( 3p) | 0.01292 | 0.69144   |
| 45 | C | 9  | S  | Cor( 1S) | 1.99908 | -11.18601 |
| 46 | C | 9  | S  | Val( 2S) | 0.89508 | -0.18953  |
| 47 | C | 9  | S  | Ryd( 3S) | 0.00180 | 1.35160   |
| 48 | C | 9  | px | Val( 2p) | 1.04707 | -0.10842  |
| 49 | C | 9  | px | Ryd( 3p) | 0.00697 | 0.67599   |
| 50 | C | 9  | py | Val( 2p) | 1.05966 | -0.10895  |
| 51 | C | 9  | py | Ryd( 3p) | 0.01012 | 0.82766   |
| 52 | C | 9  | pz | Val( 2p) | 0.99358 | -0.12068  |
| 53 | C | 9  | pz | Ryd( 3p) | 0.00780 | 0.63466   |
| 54 | C | 10 | S  | Cor( 1S) | 1.99920 | -11.15647 |
| 55 | C | 10 | S  | Val( 2S) | 0.93906 | -0.18289  |
| 56 | C | 10 | S  | Ryd( 3S) | 0.00094 | 1.22377   |
| 57 | C | 10 | px | Val( 2p) | 1.08212 | -0.07507  |
| 58 | C | 10 | px | Ryd( 3p) | 0.00684 | 0.48508   |
| 59 | C | 10 | py | Val( 2p) | 1.11698 | -0.06049  |
| 60 | C | 10 | py | Ryd( 3p) | 0.00537 | 0.61584   |
| 61 | C | 10 | pz | Val( 2p) | 1.00490 | -0.12198  |
| 62 | C | 10 | pz | Ryd( 3p) | 0.00405 | 0.49701   |
| 63 | C | 11 | S  | Cor( 1S) | 1.99931 | -11.15560 |
| 64 | C | 11 | S  | Val( 2S) | 0.94223 | -0.16763  |
| 65 | C | 11 | S  | Ryd( 3S) | 0.00072 | 1.12297   |
| 66 | C | 11 | px | Val( 2p) | 1.11283 | -0.02777  |
| 67 | C | 11 | px | Ryd( 3p) | 0.00673 | 0.47259   |
| 68 | C | 11 | py | Val( 2p) | 1.04021 | -0.07277  |
| 69 | C | 11 | py | Ryd( 3p) | 0.00437 | 0.52064   |
| 70 | C | 11 | pz | Val( 2p) | 1.02244 | -0.09622  |
| 71 | C | 11 | pz | Ryd( 3p) | 0.00486 | 0.47475   |
| 72 | C | 12 | S  | Cor( 1S) | 1.99872 | -11.11016 |
| 73 | C | 12 | S  | Val( 2S) | 0.87779 | -0.00910  |
| 74 | C | 12 | S  | Ryd( 3S) | 0.00040 | 1.12823   |
| 75 | C | 12 | px | Val( 2p) | 1.04444 | -0.08636  |
| 76 | C | 12 | px | Ryd( 3p) | 0.00447 | 0.51413   |
| 77 | C | 12 | py | Val( 2p) | 1.11242 | 0.09671   |
| 78 | C | 12 | py | Ryd( 3p) | 0.00652 | 0.41551   |
| 79 | C | 12 | pz | Val( 2p) | 1.00473 | -0.10405  |
| 80 | C | 12 | pz | Ryd( 3p) | 0.00491 | 0.46092   |
| 81 | C | 13 | S  | Cor( 1S) | 1.99919 | -11.15959 |
| 82 | C | 13 | S  | Val( 2S) | 0.93244 | -0.17220  |
| 83 | C | 13 | S  | Ryd( 3S) | 0.00092 | 1.28742   |
| 84 | C | 13 | px | Val( 2p) | 1.09047 | -0.07805  |
| 85 | C | 13 | px | Ryd( 3p) | 0.00466 | 0.58451   |
| 86 | C | 13 | py | Val( 2p) | 1.10737 | -0.06218  |
| 87 | C | 13 | py | Ryd( 3p) | 0.00884 | 0.54655   |
| 88 | C | 13 | pz | Val( 2p) | 1.03829 | -0.14522  |
| 89 | C | 13 | pz | Ryd( 3p) | 0.00495 | 0.54949   |
| 90 | C | 14 | S  | Cor( 1S) | 1.99909 | -11.13930 |
| 91 | C | 14 | S  | Val( 2S) | 0.92314 | -0.16236  |
| 92 | C | 14 | S  | Ryd( 3S) | 0.00053 | 1.64593   |
| 93 | C | 14 | px | Val( 2p) | 1.13334 | -0.02294  |
| 94 | C | 14 | px | Ryd( 3p) | 0.00984 | 0.55464   |

|     |   |    |    |          |         |           |
|-----|---|----|----|----------|---------|-----------|
| 95  | C | 14 | py | Val( 2p) | 1.01270 | -0.09143  |
| 96  | C | 14 | py | Ryd( 3p) | 0.00543 | 0.56238   |
| 97  | C | 14 | pz | Val( 2p) | 1.02795 | -0.09423  |
| 98  | C | 14 | pz | Ryd( 3p) | 0.00431 | 0.56337   |
| 99  | C | 15 | S  | Cor( 1S) | 1.99932 | -11.08290 |
| 100 | C | 15 | S  | Val( 2S) | 1.00987 | -0.16901  |
| 101 | C | 15 | S  | Ryd( 3S) | 0.00064 | 1.28743   |
| 102 | C | 15 | px | Val( 2p) | 1.18042 | -0.07724  |
| 103 | C | 15 | px | Ryd( 3p) | 0.00201 | 0.33307   |
| 104 | C | 15 | py | Val( 2p) | 1.20271 | -0.07056  |
| 105 | C | 15 | py | Ryd( 3p) | 0.00330 | 0.38084   |
| 106 | C | 15 | pz | Val( 2p) | 1.11491 | -0.08250  |
| 107 | C | 15 | pz | Ryd( 3p) | 0.00395 | 0.37799   |
| 108 | H | 16 | S  | Val( 1S) | 0.81826 | 0.19352   |
| 109 | H | 16 | S  | Ryd( 2S) | 0.00159 | 1.00540   |
| 110 | H | 17 | S  | Val( 1S) | 0.81945 | 0.19349   |
| 111 | H | 17 | S  | Ryd( 2S) | 0.00140 | 0.99496   |
| 112 | H | 18 | S  | Val( 1S) | 0.82757 | 0.18175   |
| 113 | H | 18 | S  | Ryd( 2S) | 0.00152 | 1.03787   |
| 114 | C | 19 | S  | Cor( 1S) | 1.99933 | -11.07868 |
| 115 | C | 19 | S  | Val( 2S) | 1.00709 | -0.16404  |
| 116 | C | 19 | S  | Ryd( 3S) | 0.00060 | 1.28919   |
| 117 | C | 19 | px | Val( 2p) | 1.21549 | -0.07256  |
| 118 | C | 19 | px | Ryd( 3p) | 0.00265 | 0.37443   |
| 119 | C | 19 | py | Val( 2p) | 1.14049 | -0.07671  |
| 120 | C | 19 | py | Ryd( 3p) | 0.00356 | 0.39561   |
| 121 | C | 19 | pz | Val( 2p) | 1.14467 | -0.07588  |
| 122 | C | 19 | pz | Ryd( 3p) | 0.00329 | 0.37342   |
| 123 | H | 20 | S  | Val( 1S) | 0.82240 | 0.19136   |
| 124 | H | 20 | S  | Ryd( 2S) | 0.00141 | 1.00870   |
| 125 | H | 21 | S  | Val( 1S) | 0.81900 | 0.19499   |
| 126 | H | 21 | S  | Ryd( 2S) | 0.00139 | 1.01332   |
| 127 | H | 22 | S  | Val( 1S) | 0.82504 | 0.18688   |
| 128 | H | 22 | S  | Ryd( 2S) | 0.00170 | 1.04184   |
| 129 | C | 23 | S  | Cor( 1S) | 1.99917 | -11.30124 |
| 130 | C | 23 | S  | Val( 2S) | 0.86141 | -0.24823  |
| 131 | C | 23 | S  | Ryd( 3S) | 0.00579 | 1.17773   |
| 132 | C | 23 | px | Val( 2p) | 0.90076 | -0.14139  |
| 133 | C | 23 | px | Ryd( 3p) | 0.00763 | 0.64982   |
| 134 | C | 23 | py | Val( 2p) | 0.85856 | -0.13087  |
| 135 | C | 23 | py | Ryd( 3p) | 0.00959 | 0.62436   |
| 136 | C | 23 | pz | Val( 2p) | 0.84806 | -0.09106  |
| 137 | C | 23 | pz | Ryd( 3p) | 0.00769 | 0.60891   |
| 138 | C | 24 | S  | Cor( 1S) | 1.99921 | -11.13489 |
| 139 | C | 24 | S  | Val( 2S) | 1.01996 | -0.24265  |
| 140 | C | 24 | S  | Ryd( 3S) | 0.00056 | 1.34798   |
| 141 | C | 24 | px | Val( 2p) | 1.14450 | -0.14931  |
| 142 | C | 24 | px | Ryd( 3p) | 0.00351 | 0.35552   |
| 143 | C | 24 | py | Val( 2p) | 1.23359 | -0.14473  |
| 144 | C | 24 | py | Ryd( 3p) | 0.00292 | 0.32992   |
| 145 | C | 24 | pz | Val( 2p) | 1.18362 | -0.14852  |
| 146 | C | 24 | pz | Ryd( 3p) | 0.00309 | 0.33525   |



|     |   |    |    |          |         |           |
|-----|---|----|----|----------|---------|-----------|
| 147 | H | 25 | S  | Val( 1S) | 0.78532 | 0.16801   |
| 148 | H | 25 | S  | Ryd( 2S) | 0.00162 | 1.06702   |
| 149 | H | 26 | S  | Val( 1S) | 0.79101 | 0.15093   |
| 150 | H | 26 | S  | Ryd( 2S) | 0.00124 | 1.00490   |
| 151 | H | 27 | S  | Val( 1S) | 0.79352 | 0.14151   |
| 152 | H | 27 | S  | Ryd( 2S) | 0.00146 | 1.06042   |
| 153 | C | 28 | S  | Cor( 1S) | 1.99891 | -11.22584 |
| 154 | C | 28 | S  | Val( 2S) | 0.84416 | -0.17373  |
| 155 | C | 28 | S  | Ryd( 3S) | 0.00200 | 1.27984   |
| 156 | C | 28 | px | Val( 2p) | 0.99244 | -0.10541  |
| 157 | C | 28 | px | Ryd( 3p) | 0.00697 | 0.64057   |
| 158 | C | 28 | py | Val( 2p) | 0.97864 | -0.09709  |
| 159 | C | 28 | py | Ryd( 3p) | 0.00780 | 0.72497   |
| 160 | C | 28 | pz | Val( 2p) | 1.02469 | -0.15625  |
| 161 | C | 28 | pz | Ryd( 3p) | 0.01224 | 0.67129   |
| 162 | C | 29 | S  | Cor( 1S) | 1.99909 | -11.18961 |
| 163 | C | 29 | S  | Val( 2S) | 0.89566 | -0.19361  |
| 164 | C | 29 | S  | Ryd( 3S) | 0.00170 | 1.36059   |
| 165 | C | 29 | px | Val( 2p) | 1.04943 | -0.11475  |
| 166 | C | 29 | px | Ryd( 3p) | 0.00986 | 0.77012   |
| 167 | C | 29 | py | Val( 2p) | 1.03862 | -0.09899  |
| 168 | C | 29 | py | Ryd( 3p) | 0.00690 | 0.68174   |
| 169 | C | 29 | pz | Val( 2p) | 0.98259 | -0.12184  |
| 170 | C | 29 | pz | Ryd( 3p) | 0.00890 | 0.63416   |
| 171 | C | 30 | S  | Cor( 1S) | 1.99902 | -11.12759 |
| 172 | C | 30 | S  | Val( 2S) | 0.89570 | -0.08675  |
| 173 | C | 30 | S  | Ryd( 3S) | 0.00083 | 1.21858   |
| 174 | C | 30 | px | Val( 2p) | 1.08337 | -0.06113  |
| 175 | C | 30 | px | Ryd( 3p) | 0.00361 | 0.62701   |
| 176 | C | 30 | py | Val( 2p) | 1.13066 | -0.01125  |
| 177 | C | 30 | py | Ryd( 3p) | 0.00848 | 0.43369   |
| 178 | C | 30 | pz | Val( 2p) | 1.00757 | -0.12270  |
| 179 | C | 30 | pz | Ryd( 3p) | 0.00354 | 0.51639   |
| 180 | C | 31 | S  | Cor( 1S) | 1.99930 | -11.15402 |
| 181 | C | 31 | S  | Val( 2S) | 0.93345 | -0.15889  |
| 182 | C | 31 | S  | Ryd( 3S) | 0.00087 | 1.13726   |
| 183 | C | 31 | px | Val( 2p) | 1.08411 | -0.04446  |
| 184 | C | 31 | px | Ryd( 3p) | 0.00498 | 0.49828   |
| 185 | C | 31 | py | Val( 2p) | 1.08568 | -0.06868  |
| 186 | C | 31 | py | Ryd( 3p) | 0.00581 | 0.49120   |
| 187 | C | 31 | pz | Val( 2p) | 1.02827 | -0.09464  |
| 188 | C | 31 | pz | Ryd( 3p) | 0.00474 | 0.47272   |
| 189 | C | 32 | S  | Cor( 1S) | 1.99915 | -11.14048 |
| 190 | C | 32 | S  | Val( 2S) | 0.91349 | -0.10672  |
| 191 | C | 32 | S  | Ryd( 3S) | 0.00059 | 1.11086   |
| 192 | C | 32 | px | Val( 2p) | 1.10140 | 0.01266   |
| 193 | C | 32 | px | Ryd( 3p) | 0.00716 | 0.41961   |
| 194 | C | 32 | py | Val( 2p) | 1.04637 | -0.07214  |
| 195 | C | 32 | py | Ryd( 3p) | 0.00432 | 0.51368   |
| 196 | C | 32 | pz | Val( 2p) | 1.00461 | -0.10673  |
| 197 | C | 32 | pz | Ryd( 3p) | 0.00528 | 0.45706   |
| 198 | C | 33 | S  | Cor( 1S) | 1.99917 | -11.15596 |
| 199 | C | 33 | S  | Val( 2S) | 0.92510 | -0.16432  |

|     |   |    |    |          |         |           |
|-----|---|----|----|----------|---------|-----------|
| 200 | C | 33 | S  | Ryd( 3S) | 0.00090 | 1.24559   |
| 201 | C | 33 | px | Val( 2p) | 1.06491 | -0.11287  |
| 202 | C | 33 | px | Ryd( 3p) | 0.00676 | 0.53553   |
| 203 | C | 33 | py | Val( 2p) | 1.14621 | -0.03820  |
| 204 | C | 33 | py | Ryd( 3p) | 0.00694 | 0.52887   |
| 205 | C | 33 | pz | Val( 2p) | 1.04926 | -0.15138  |
| 206 | C | 33 | pz | Ryd( 3p) | 0.00493 | 0.56800   |
| 207 | C | 34 | S  | Cor( 1S) | 1.99922 | -11.16063 |
| 208 | C | 34 | S  | Val( 2S) | 0.94853 | -0.21792  |
| 209 | C | 34 | S  | Ryd( 3S) | 0.00059 | 1.63561   |
| 210 | C | 34 | px | Val( 2p) | 1.02029 | -0.09048  |
| 211 | C | 34 | px | Ryd( 3p) | 0.00451 | 0.48023   |
| 212 | C | 34 | py | Val( 2p) | 1.08588 | -0.08707  |
| 213 | C | 34 | py | Ryd( 3p) | 0.00899 | 0.65200   |
| 214 | C | 34 | pz | Val( 2p) | 1.06734 | -0.07810  |
| 215 | C | 34 | pz | Ryd( 3p) | 0.00563 | 0.53747   |
| 216 | C | 35 | S  | Cor( 1S) | 1.99931 | -11.08317 |
| 217 | C | 35 | S  | Val( 2S) | 1.01070 | -0.16993  |
| 218 | C | 35 | S  | Ryd( 3S) | 0.00059 | 1.28869   |
| 219 | C | 35 | px | Val( 2p) | 1.21830 | -0.07177  |
| 220 | C | 35 | px | Ryd( 3p) | 0.00300 | 0.38020   |
| 221 | C | 35 | py | Val( 2p) | 1.09477 | -0.07930  |
| 222 | C | 35 | py | Ryd( 3p) | 0.00297 | 0.35525   |
| 223 | C | 35 | pz | Val( 2p) | 1.18154 | -0.07516  |
| 224 | C | 35 | pz | Ryd( 3p) | 0.00377 | 0.35743   |
| 225 | H | 36 | S  | Val( 1S) | 0.82656 | 0.18342   |
| 226 | H | 36 | S  | Ryd( 2S) | 0.00159 | 1.02838   |
| 227 | H | 37 | S  | Val( 1S) | 0.81619 | 0.19892   |
| 228 | H | 37 | S  | Ryd( 2S) | 0.00135 | 1.00210   |
| 229 | H | 38 | S  | Val( 1S) | 0.81866 | 0.19685   |
| 230 | H | 38 | S  | Ryd( 2S) | 0.00145 | 0.99191   |
| 231 | C | 39 | S  | Cor( 1S) | 1.99932 | -11.08959 |
| 232 | C | 39 | S  | Val( 2S) | 1.01065 | -0.17356  |
| 233 | C | 39 | S  | Ryd( 3S) | 0.00074 | 1.28898   |
| 234 | C | 39 | px | Val( 2p) | 1.15953 | -0.08406  |
| 235 | C | 39 | px | Ryd( 3p) | 0.00391 | 0.44208   |
| 236 | C | 39 | py | Val( 2p) | 1.20979 | -0.07383  |
| 237 | C | 39 | py | Ryd( 3p) | 0.00348 | 0.41832   |
| 238 | C | 39 | pz | Val( 2p) | 1.12338 | -0.08518  |
| 239 | C | 39 | pz | Ryd( 3p) | 0.00276 | 0.38792   |
| 240 | H | 40 | S  | Val( 1S) | 0.83226 | 0.17453   |
| 241 | H | 40 | S  | Ryd( 2S) | 0.00146 | 1.06386   |
| 242 | H | 41 | S  | Val( 1S) | 0.81858 | 0.19029   |
| 243 | H | 41 | S  | Ryd( 2S) | 0.00142 | 0.99340   |
| 244 | H | 42 | S  | Val( 1S) | 0.81867 | 0.19501   |
| 245 | H | 42 | S  | Ryd( 2S) | 0.00152 | 1.05152   |
| 246 | C | 43 | S  | Cor( 1S) | 1.99915 | -11.30115 |
| 247 | C | 43 | S  | Val( 2S) | 0.85970 | -0.24551  |
| 248 | C | 43 | S  | Ryd( 3S) | 0.00607 | 1.15859   |
| 249 | C | 43 | px | Val( 2p) | 0.77719 | -0.12828  |
| 250 | C | 43 | px | Ryd( 3p) | 0.00979 | 0.62257   |
| 251 | C | 43 | py | Val( 2p) | 0.97872 | -0.15045  |

|     |   |    |    |          |         |           |
|-----|---|----|----|----------|---------|-----------|
| 252 | C | 43 | py | Ryd( 3p) | 0.00739 | 0.71485   |
| 253 | C | 43 | pz | Val( 2p) | 0.85124 | -0.08553  |
| 254 | C | 43 | pz | Ryd( 3p) | 0.00769 | 0.61376   |
| 255 | C | 44 | S  | Cor( 1S) | 1.99921 | -11.13755 |
| 256 | C | 44 | S  | Val( 2S) | 1.02141 | -0.24564  |
| 257 | C | 44 | S  | Ryd( 3S) | 0.00055 | 1.33011   |
| 258 | C | 44 | px | Val( 2p) | 1.23264 | -0.14309  |
| 259 | C | 44 | px | Ryd( 3p) | 0.00194 | 0.36741   |
| 260 | C | 44 | py | Val( 2p) | 1.14047 | -0.15210  |
| 261 | C | 44 | py | Ryd( 3p) | 0.00420 | 0.34940   |
| 262 | C | 44 | pz | Val( 2p) | 1.18623 | -0.14790  |
| 263 | C | 44 | pz | Ryd( 3p) | 0.00300 | 0.33126   |
| 264 | H | 45 | S  | Val( 1S) | 0.78607 | 0.16603   |
| 265 | H | 45 | S  | Ryd( 2S) | 0.00159 | 1.05579   |
| 266 | H | 46 | S  | Val( 1S) | 0.79384 | 0.14865   |
| 267 | H | 46 | S  | Ryd( 2S) | 0.00116 | 1.00506   |
| 268 | H | 47 | S  | Val( 1S) | 0.79052 | 0.14676   |
| 269 | H | 47 | S  | Ryd( 2S) | 0.00126 | 1.03472   |
| 270 | C | 48 | S  | Cor( 1S) | 1.99891 | -11.23310 |
| 271 | C | 48 | S  | Val( 2S) | 0.84185 | -0.17606  |
| 272 | C | 48 | S  | Ryd( 3S) | 0.00205 | 1.30139   |
| 273 | C | 48 | px | Val( 2p) | 1.06480 | -0.12584  |
| 274 | C | 48 | px | Ryd( 3p) | 0.00643 | 0.69110   |
| 275 | C | 48 | py | Val( 2p) | 0.91246 | -0.08417  |
| 276 | C | 48 | py | Ryd( 3p) | 0.00759 | 0.67408   |
| 277 | C | 48 | pz | Val( 2p) | 1.01439 | -0.15206  |
| 278 | C | 48 | pz | Ryd( 3p) | 0.01290 | 0.69470   |
| 279 | C | 49 | S  | Cor( 1S) | 1.99907 | -11.18938 |
| 280 | C | 49 | S  | Val( 2S) | 0.89283 | -0.19182  |
| 281 | C | 49 | S  | Ryd( 3S) | 0.00166 | 1.35157   |
| 282 | C | 49 | px | Val( 2p) | 1.05934 | -0.11053  |
| 283 | C | 49 | px | Ryd( 3p) | 0.00815 | 0.77007   |
| 284 | C | 49 | py | Val( 2p) | 1.04001 | -0.11929  |
| 285 | C | 49 | py | Ryd( 3p) | 0.00805 | 0.66664   |
| 286 | C | 49 | pz | Val( 2p) | 1.00617 | -0.12551  |
| 287 | C | 49 | pz | Ryd( 3p) | 0.00821 | 0.65024   |
| 288 | C | 50 | S  | Cor( 1S) | 1.99918 | -11.15241 |
| 289 | C | 50 | S  | Val( 2S) | 0.93112 | -0.17034  |
| 290 | C | 50 | S  | Ryd( 3S) | 0.00090 | 1.22132   |
| 291 | C | 50 | px | Val( 2p) | 1.15897 | -0.03815  |
| 292 | C | 50 | px | Ryd( 3p) | 0.00777 | 0.51081   |
| 293 | C | 50 | py | Val( 2p) | 1.03615 | -0.10177  |
| 294 | C | 50 | py | Ryd( 3p) | 0.00428 | 0.55701   |
| 295 | C | 50 | pz | Val( 2p) | 1.01152 | -0.11806  |
| 296 | C | 50 | pz | Ryd( 3p) | 0.00411 | 0.49569   |
| 297 | C | 51 | S  | Cor( 1S) | 1.99924 | -11.14420 |
| 298 | C | 51 | S  | Val( 2S) | 0.92705 | -0.14237  |
| 299 | C | 51 | S  | Ryd( 3S) | 0.00068 | 1.11403   |
| 300 | C | 51 | px | Val( 2p) | 1.07049 | -0.05103  |
| 301 | C | 51 | px | Ryd( 3p) | 0.00446 | 0.51849   |
| 302 | C | 51 | py | Val( 2p) | 1.08036 | -0.05972  |
| 303 | C | 51 | py | Ryd( 3p) | 0.00662 | 0.45000   |
| 304 | C | 51 | pz | Val( 2p) | 1.03187 | -0.08686  |
| 305 | C | 51 | pz | Ryd( 3p) | 0.00506 | 0.45903   |

|     |   |    |    |          |         |           |
|-----|---|----|----|----------|---------|-----------|
| 306 | C | 52 | S  | Cor( 1S) | 1.99931 | -11.16278 |
| 307 | C | 52 | S  | Val( 2S) | 0.93967 | -0.17717  |
| 308 | C | 52 | S  | Ryd( 3S) | 0.00071 | 1.11741   |
| 309 | C | 52 | px | Val( 2p) | 1.09494 | -0.05993  |
| 310 | C | 52 | px | Ryd( 3p) | 0.00567 | 0.49621   |
| 311 | C | 52 | py | Val( 2p) | 1.07377 | -0.06464  |
| 312 | C | 52 | py | Ryd( 3p) | 0.00570 | 0.48062   |
| 313 | C | 52 | pz | Val( 2p) | 1.01882 | -0.11068  |
| 314 | C | 52 | pz | Ryd( 3p) | 0.00495 | 0.46300   |
| 315 | C | 53 | S  | Cor( 1S) | 1.99916 | -11.16117 |
| 316 | C | 53 | S  | Val( 2S) | 0.92470 | -0.16940  |
| 317 | C | 53 | S  | Ryd( 3S) | 0.00098 | 1.24410   |
| 318 | C | 53 | px | Val( 2p) | 1.15625 | -0.02874  |
| 319 | C | 53 | px | Ryd( 3p) | 0.00870 | 0.51233   |
| 320 | C | 53 | py | Val( 2p) | 1.05298 | -0.13147  |
| 321 | C | 53 | py | Ryd( 3p) | 0.00510 | 0.53736   |
| 322 | C | 53 | pz | Val( 2p) | 1.04722 | -0.14736  |
| 323 | C | 53 | pz | Ryd( 3p) | 0.00469 | 0.54926   |
| 324 | C | 54 | S  | Cor( 1S) | 1.99926 | -11.16784 |
| 325 | C | 54 | S  | Val( 2S) | 0.95266 | -0.23196  |
| 326 | C | 54 | S  | Ryd( 3S) | 0.00054 | 1.66840   |
| 327 | C | 54 | px | Val( 2p) | 1.04360 | -0.09846  |
| 328 | C | 54 | px | Ryd( 3p) | 0.00774 | 0.67171   |
| 329 | C | 54 | py | Val( 2p) | 1.11131 | -0.07389  |
| 330 | C | 54 | py | Ryd( 3p) | 0.00757 | 0.48830   |
| 331 | C | 54 | pz | Val( 2p) | 1.01030 | -0.10208  |
| 332 | C | 54 | pz | Ryd( 3p) | 0.00386 | 0.55663   |
| 333 | C | 55 | S  | Cor( 1S) | 1.99931 | -11.09072 |
| 334 | C | 55 | S  | Val( 2S) | 1.00934 | -0.17665  |
| 335 | C | 55 | S  | Ryd( 3S) | 0.00071 | 1.29404   |
| 336 | C | 55 | px | Val( 2p) | 1.20209 | -0.07479  |
| 337 | C | 55 | px | Ryd( 3p) | 0.00341 | 0.37059   |
| 338 | C | 55 | py | Val( 2p) | 1.21269 | -0.08232  |
| 339 | C | 55 | py | Ryd( 3p) | 0.00245 | 0.39029   |
| 340 | C | 55 | pz | Val( 2p) | 1.08037 | -0.09575  |
| 341 | C | 55 | pz | Ryd( 3p) | 0.00395 | 0.38288   |
| 342 | H | 56 | S  | Val( 1S) | 0.81526 | 0.19529   |
| 343 | H | 56 | S  | Ryd( 2S) | 0.00167 | 1.01212   |
| 344 | H | 57 | S  | Val( 1S) | 0.81805 | 0.18757   |
| 345 | H | 57 | S  | Ryd( 2S) | 0.00142 | 0.98933   |
| 346 | H | 58 | S  | Val( 1S) | 0.83804 | 0.16315   |
| 347 | H | 58 | S  | Ryd( 2S) | 0.00201 | 1.14228   |
| 348 | C | 59 | S  | Cor( 1S) | 1.99931 | -11.08574 |
| 349 | C | 59 | S  | Val( 2S) | 1.01089 | -0.17410  |
| 350 | C | 59 | S  | Ryd( 3S) | 0.00061 | 1.29168   |
| 351 | C | 59 | px | Val( 2p) | 1.10107 | -0.08331  |
| 352 | C | 59 | px | Ryd( 3p) | 0.00353 | 0.36976   |
| 353 | C | 59 | py | Val( 2p) | 1.21815 | -0.07460  |
| 354 | C | 59 | py | Ryd( 3p) | 0.00286 | 0.38650   |
| 355 | C | 59 | pz | Val( 2p) | 1.18633 | -0.07688  |
| 356 | C | 59 | pz | Ryd( 3p) | 0.00364 | 0.37847   |
| 357 | H | 60 | S  | Val( 1S) | 0.81664 | 0.19483   |
| 358 | H | 60 | S  | Ryd( 2S) | 0.00141 | 1.00246   |

|     |   |    |    |          |         |           |
|-----|---|----|----|----------|---------|-----------|
| 359 | H | 61 | S  | Val( 1S) | 0.81385 | 0.19941   |
| 360 | H | 61 | S  | Ryd( 2S) | 0.00126 | 1.03169   |
| 361 | H | 62 | S  | Val( 1S) | 0.82113 | 0.18738   |
| 362 | H | 62 | S  | Ryd( 2S) | 0.00177 | 0.99167   |
| 363 | H | 63 | S  | Val( 1S) | 0.82230 | 0.23234   |
| 364 | H | 63 | S  | Ryd( 2S) | 0.00158 | 1.09232   |
| 365 | H | 64 | S  | Val( 1S) | 0.82834 | 0.26571   |
| 366 | H | 64 | S  | Ryd( 2S) | 0.00165 | 1.02888   |
| 367 | H | 65 | S  | Val( 1S) | 0.92010 | 0.37833   |
| 368 | H | 65 | S  | Ryd( 2S) | 0.00198 | 0.90874   |
| 369 | H | 66 | S  | Val( 1S) | 0.83533 | 0.23002   |
| 370 | H | 66 | S  | Ryd( 2S) | 0.00196 | 1.15377   |
| 371 | H | 67 | S  | Val( 1S) | 0.85201 | 0.25514   |
| 372 | H | 67 | S  | Ryd( 2S) | 0.00351 | 1.08711   |
| 373 | H | 68 | S  | Val( 1S) | 0.86157 | 0.31858   |
| 374 | H | 68 | S  | Ryd( 2S) | 0.00243 | 1.05958   |
| 375 | H | 69 | S  | Val( 1S) | 0.81815 | 0.25512   |
| 376 | H | 69 | S  | Ryd( 2S) | 0.00190 | 1.04313   |
| 377 | H | 70 | S  | Val( 1S) | 0.87321 | 0.32408   |
| 378 | H | 70 | S  | Ryd( 2S) | 0.00171 | 0.96935   |
| 379 | H | 71 | S  | Val( 1S) | 0.84284 | 0.24278   |
| 380 | H | 71 | S  | Ryd( 2S) | 0.00168 | 1.14368   |
| 381 | H | 72 | S  | Val( 1S) | 0.83095 | 0.20881   |
| 382 | H | 72 | S  | Ryd( 2S) | 0.00302 | 1.08942   |
| 383 | H | 73 | S  | Val( 1S) | 0.82389 | 0.24030   |
| 384 | H | 73 | S  | Ryd( 2S) | 0.00176 | 1.08862   |
| 385 | H | 74 | S  | Val( 1S) | 0.83921 | 0.29151   |
| 386 | H | 74 | S  | Ryd( 2S) | 0.00196 | 1.02026   |
| 387 | H | 75 | S  | Val( 1S) | 0.82091 | 0.24397   |
| 388 | H | 75 | S  | Ryd( 2S) | 0.00143 | 1.04097   |
| 389 | H | 76 | S  | Val( 1S) | 0.83338 | 0.24184   |
| 390 | H | 76 | S  | Ryd( 2S) | 0.00165 | 1.11496   |
| 391 | H | 77 | S  | Val( 1S) | 0.83161 | 0.17140   |
| 392 | H | 77 | S  | Ryd( 2S) | 0.00298 | 1.14521   |
| 393 | N | 78 | S  | Cor( 1S) | 1.99944 | -15.49063 |
| 394 | N | 78 | S  | Val( 2S) | 1.36476 | -0.77226  |
| 395 | N | 78 | S  | Ryd( 3S) | 0.00228 | 1.90474   |
| 396 | N | 78 | px | Val( 2p) | 1.47578 | -0.39863  |
| 397 | N | 78 | px | Ryd( 3p) | 0.01145 | 1.09332   |
| 398 | N | 78 | py | Val( 2p) | 1.35835 | -0.36365  |
| 399 | N | 78 | py | Ryd( 3p) | 0.00602 | 0.90509   |
| 400 | N | 78 | pz | Val( 2p) | 1.44877 | -0.42415  |
| 401 | N | 78 | pz | Ryd( 3p) | 0.00745 | 0.85918   |

|     |    |    |       |          |         |           |
|-----|----|----|-------|----------|---------|-----------|
| 402 | N  | 79 | S     | Cor( 1S) | 1.99945 | -15.49327 |
| 403 | N  | 79 | S     | Val( 2S) | 1.36950 | -0.78097  |
| 404 | N  | 79 | S     | Ryd( 3S) | 0.00230 | 1.90149   |
| 405 | N  | 79 | px    | Val( 2p) | 1.56589 | -0.43384  |
| 406 | N  | 79 | px    | Ryd( 3p) | 0.00820 | 0.93586   |
| 407 | N  | 79 | py    | Val( 2p) | 1.31816 | -0.35689  |
| 408 | N  | 79 | py    | Ryd( 3p) | 0.00901 | 1.06327   |
| 409 | N  | 79 | pz    | Val( 2p) | 1.42152 | -0.41515  |
| 410 | N  | 79 | pz    | Ryd( 3p) | 0.00704 | 0.86335   |
|     |    |    |       |          |         |           |
| 411 | N  | 80 | S     | Cor( 1S) | 1.99943 | -15.49466 |
| 412 | N  | 80 | S     | Val( 2S) | 1.36026 | -0.77745  |
| 413 | N  | 80 | S     | Ryd( 3S) | 0.00245 | 1.90334   |
| 414 | N  | 80 | px    | Val( 2p) | 1.30119 | -0.35544  |
| 415 | N  | 80 | px    | Ryd( 3p) | 0.00673 | 0.96497   |
| 416 | N  | 80 | py    | Val( 2p) | 1.60392 | -0.44739  |
| 417 | N  | 80 | py    | Ryd( 3p) | 0.01172 | 1.04050   |
| 418 | N  | 80 | pz    | Val( 2p) | 1.41069 | -0.41883  |
| 419 | N  | 80 | pz    | Ryd( 3p) | 0.00708 | 0.87824   |
|     |    |    |       |          |         |           |
| 420 | Tl | 81 | S     | Val( 6S) | 1.94833 | -0.48876  |
| 421 | Tl | 81 | S     | Ryd( 7S) | 0.00024 | 10.74317  |
| 422 | Tl | 81 | px    | Val( 6p) | 0.01963 | 0.01704   |
| 423 | Tl | 81 | px    | Ryd( 7p) | 0.00104 | 0.41618   |
| 424 | Tl | 81 | py    | Val( 6p) | 0.01942 | 0.02837   |
| 425 | Tl | 81 | py    | Ryd( 7p) | 0.00125 | 0.44119   |
| 426 | Tl | 81 | pz    | Val( 6p) | 0.08160 | 0.05170   |
| 427 | Tl | 81 | pz    | Ryd( 7p) | 0.00224 | 0.52466   |
| 428 | Tl | 81 | dxy   | Cor( 5d) | 1.99782 | -0.93384  |
| 429 | Tl | 81 | dxy   | Ryd( 6d) | 0.00003 | 1.72920   |
| 430 | Tl | 81 | dxz   | Cor( 5d) | 1.99718 | -0.92973  |
| 431 | Tl | 81 | dxz   | Ryd( 6d) | 0.00006 | 1.80849   |
| 432 | Tl | 81 | dyz   | Cor( 5d) | 1.99661 | -0.92912  |
| 433 | Tl | 81 | dyz   | Ryd( 6d) | 0.00007 | 1.84361   |
| 434 | Tl | 81 | dx2y2 | Cor( 5d) | 1.99762 | -0.93380  |
| 435 | Tl | 81 | dx2y2 | Ryd( 6d) | 0.00002 | 1.73393   |
| 436 | Tl | 81 | dz2   | Cor( 5d) | 1.99688 | -0.92941  |
| 437 | Tl | 81 | dz2   | Ryd( 6d) | 0.00004 | 1.77140   |

[ 68 electrons found in the effective core potential]

WARNING: 1 low occupancy (<1.9990e) core orbital found on C 1  
 1 low occupancy (<1.9990e) core orbital found on C 8  
 1 low occupancy (<1.9990e) core orbital found on C 12  
 1 low occupancy (<1.9990e) core orbital found on C 28  
 1 low occupancy (<1.9990e) core orbital found on C 48  
 5 low occupancy (<1.9990e) core orbitals found on Tl 81

Summary of Natural Population Analysis:

| Natural Population |    |          |         |         |         |         |
|--------------------|----|----------|---------|---------|---------|---------|
| Atom               | No | Charge   | Core    | Valence | Rydberg | Total   |
| C                  | 1  | -0.33377 | 1.99896 | 4.29682 | 0.03799 | 6.33377 |
| H                  | 2  | 0.20374  | 0.00000 | 0.79434 | 0.00191 | 0.79626 |
| C                  | 3  | 0.48900  | 1.99916 | 3.48126 | 0.03058 | 5.51100 |
| C                  | 4  | -0.58802 | 1.99921 | 4.57909 | 0.00973 | 6.58802 |
| H                  | 5  | 0.21261  | 0.00000 | 0.78586 | 0.00153 | 0.78739 |
| H                  | 6  | 0.20502  | 0.00000 | 0.79377 | 0.00120 | 0.79498 |
| H                  | 7  | 0.20498  | 0.00000 | 0.79380 | 0.00122 | 0.79502 |

|   |    |          |         |         |         |         |
|---|----|----------|---------|---------|---------|---------|
| C | 8  | 0.13684  | 1.99890 | 3.83481 | 0.02945 | 5.86316 |
| C | 9  | -0.02117 | 1.99908 | 3.99539 | 0.02670 | 6.02117 |
| C | 10 | -0.15946 | 1.99920 | 4.14306 | 0.01720 | 6.15946 |
| C | 11 | -0.13372 | 1.99931 | 4.11772 | 0.01669 | 6.13372 |
| C | 12 | -0.05440 | 1.99872 | 4.03939 | 0.01630 | 6.05440 |
| C | 13 | -0.18714 | 1.99919 | 4.16857 | 0.01938 | 6.18714 |
| C | 14 | -0.11632 | 1.99909 | 4.09712 | 0.02011 | 6.11632 |
| C | 15 | -0.51714 | 1.99932 | 4.50791 | 0.00990 | 6.51714 |
| H | 16 | 0.18014  | 0.00000 | 0.81826 | 0.00159 | 0.81986 |
| H | 17 | 0.17915  | 0.00000 | 0.81945 | 0.00140 | 0.82085 |
| H | 18 | 0.17090  | 0.00000 | 0.82757 | 0.00152 | 0.82910 |
| C | 19 | -0.51718 | 1.99933 | 4.50775 | 0.01010 | 6.51718 |
| H | 20 | 0.17619  | 0.00000 | 0.82240 | 0.00141 | 0.82381 |
| H | 21 | 0.17960  | 0.00000 | 0.81900 | 0.00139 | 0.82040 |
| H | 22 | 0.17326  | 0.00000 | 0.82504 | 0.00170 | 0.82674 |
| C | 23 | 0.50134  | 1.99917 | 3.46879 | 0.03071 | 5.49866 |
| C | 24 | -0.59095 | 1.99921 | 4.58166 | 0.01008 | 6.59095 |
| H | 25 | 0.21306  | 0.00000 | 0.78532 | 0.00162 | 0.78694 |
| H | 26 | 0.20775  | 0.00000 | 0.79101 | 0.00124 | 0.79225 |
| H | 27 | 0.20503  | 0.00000 | 0.79352 | 0.00146 | 0.79497 |
| C | 28 | 0.13215  | 1.99891 | 3.83993 | 0.02901 | 5.86785 |
| C | 29 | 0.00725  | 1.99909 | 3.96630 | 0.02736 | 5.99275 |
| C | 30 | -0.13278 | 1.99902 | 4.11730 | 0.01645 | 6.13278 |
| C | 31 | -0.14722 | 1.99930 | 4.13151 | 0.01640 | 6.14722 |
| C | 32 | -0.08237 | 1.99915 | 4.06586 | 0.01735 | 6.08237 |
| C | 33 | -0.20418 | 1.99917 | 4.18549 | 0.01952 | 6.20418 |
| C | 34 | -0.14098 | 1.99922 | 4.12204 | 0.01973 | 6.14098 |
| C | 35 | -0.51495 | 1.99931 | 4.50531 | 0.01033 | 6.51495 |
| H | 36 | 0.17185  | 0.00000 | 0.82656 | 0.00159 | 0.82815 |
| H | 37 | 0.18245  | 0.00000 | 0.81619 | 0.00135 | 0.81755 |
| H | 38 | 0.17989  | 0.00000 | 0.81866 | 0.00145 | 0.82011 |
| C | 39 | -0.51355 | 1.99932 | 4.50335 | 0.01088 | 6.51355 |
| H | 40 | 0.16629  | 0.00000 | 0.83226 | 0.00146 | 0.83371 |
| H | 41 | 0.18000  | 0.00000 | 0.81858 | 0.00142 | 0.82000 |
| H | 42 | 0.17981  | 0.00000 | 0.81867 | 0.00152 | 0.82019 |
| C | 43 | 0.50307  | 1.99915 | 3.46685 | 0.03093 | 5.49693 |
| C | 44 | -0.58965 | 1.99921 | 4.58076 | 0.00968 | 6.58965 |
| H | 45 | 0.21234  | 0.00000 | 0.78607 | 0.00159 | 0.78766 |
| H | 46 | 0.20500  | 0.00000 | 0.79384 | 0.00116 | 0.79500 |
| H | 47 | 0.20822  | 0.00000 | 0.79052 | 0.00126 | 0.79178 |
| C | 48 | 0.13862  | 1.99891 | 3.83350 | 0.02897 | 5.86138 |
| C | 49 | -0.02350 | 1.99907 | 3.99835 | 0.02608 | 6.02350 |
| C | 50 | -0.15399 | 1.99918 | 4.13776 | 0.01705 | 6.15399 |
| C | 51 | -0.12581 | 1.99924 | 4.10975 | 0.01681 | 6.12581 |
| C | 52 | -0.14352 | 1.99931 | 4.12719 | 0.01703 | 6.14352 |
| C | 53 | -0.19979 | 1.99916 | 4.18115 | 0.01947 | 6.19979 |
| C | 54 | -0.13683 | 1.99926 | 4.11786 | 0.01970 | 6.13683 |
| C | 55 | -0.51431 | 1.99931 | 4.50448 | 0.01052 | 6.51431 |
| H | 56 | 0.18307  | 0.00000 | 0.81526 | 0.00167 | 0.81693 |
| H | 57 | 0.18053  | 0.00000 | 0.81805 | 0.00142 | 0.81947 |
| H | 58 | 0.15994  | 0.00000 | 0.83804 | 0.00201 | 0.84006 |
| C | 59 | -0.52641 | 1.99931 | 4.51645 | 0.01065 | 6.52641 |
| H | 60 | 0.18195  | 0.00000 | 0.81664 | 0.00141 | 0.81805 |
| H | 61 | 0.18489  | 0.00000 | 0.81385 | 0.00126 | 0.81511 |
| H | 62 | 0.17710  | 0.00000 | 0.82113 | 0.00177 | 0.82290 |
| H | 63 | 0.17612  | 0.00000 | 0.82230 | 0.00158 | 0.82388 |
| H | 64 | 0.17001  | 0.00000 | 0.82834 | 0.00165 | 0.82999 |
| H | 65 | 0.07793  | 0.00000 | 0.92010 | 0.00198 | 0.92207 |
| H | 66 | 0.16271  | 0.00000 | 0.83533 | 0.00196 | 0.83729 |
| H | 67 | 0.14448  | 0.00000 | 0.85201 | 0.00351 | 0.85552 |
| H | 68 | 0.13599  | 0.00000 | 0.86157 | 0.00243 | 0.86401 |
| H | 69 | 0.17995  | 0.00000 | 0.81815 | 0.00190 | 0.82005 |

|    |    |          |          |         |         |          |
|----|----|----------|----------|---------|---------|----------|
| H  | 70 | 0.12508  | 0.00000  | 0.87321 | 0.00171 | 0.87492  |
| H  | 71 | 0.15548  | 0.00000  | 0.84284 | 0.00168 | 0.84452  |
| H  | 72 | 0.16603  | 0.00000  | 0.83095 | 0.00302 | 0.83397  |
| H  | 73 | 0.17435  | 0.00000  | 0.82389 | 0.00176 | 0.82565  |
| H  | 74 | 0.15883  | 0.00000  | 0.83921 | 0.00196 | 0.84117  |
| H  | 75 | 0.17766  | 0.00000  | 0.82091 | 0.00143 | 0.82234  |
| H  | 76 | 0.16497  | 0.00000  | 0.83338 | 0.00165 | 0.83503  |
| H  | 77 | 0.16540  | 0.00000  | 0.83161 | 0.00298 | 0.83460  |
| N  | 78 | -0.67429 | 1.99944  | 5.64765 | 0.02720 | 7.67429  |
| N  | 79 | -0.70109 | 1.99945  | 5.67508 | 0.02655 | 7.70109  |
| N  | 80 | -0.70347 | 1.99943  | 5.67606 | 0.02798 | 7.70347  |
| Tl | 81 | 0.93991  | 77.98612 | 2.06898 | 0.00499 | 80.06009 |

---

\* Total \* 1.00000 151.95588 195.22580 0.81832 348.00000

Natural Population

---

Effective Core 68.00000  
Core 83.95588 ( 99.9475% of 84)  
Valence 195.22580 ( 99.6050% of 196)  
Natural Minimal Basis 347.18168 ( 99.7649% of 348)  
Natural Rydberg Basis 0.81832 ( 0.2351% of 348)

---

Atom No Natural Electron Configuration

---

C 1 [core]2S( 0.96)2p( 3.33)3p( 0.04)  
H 2 1S( 0.79)  
C 3 [core]2S( 0.86)2p( 2.62)3S( 0.01)3p( 0.02)  
C 4 [core]2S( 1.02)2p( 3.56)3p( 0.01)  
H 5 1S( 0.79)  
H 6 1S( 0.79)  
H 7 1S( 0.79)  
C 8 [core]2S( 0.84)2p( 2.99)3p( 0.03)  
C 9 [core]2S( 0.90)2p( 3.10)3p( 0.02)  
C 10 [core]2S( 0.94)2p( 3.20)3p( 0.02)  
C 11 [core]2S( 0.94)2p( 3.18)3p( 0.02)  
C 12 [core]2S( 0.88)2p( 3.16)3p( 0.02)  
C 13 [core]2S( 0.93)2p( 3.24)3p( 0.02)  
C 14 [core]2S( 0.92)2p( 3.17)3p( 0.02)  
C 15 [core]2S( 1.01)2p( 3.50)3p( 0.01)  
H 16 1S( 0.82)  
H 17 1S( 0.82)  
H 18 1S( 0.83)  
C 19 [core]2S( 1.01)2p( 3.50)3p( 0.01)  
H 20 1S( 0.82)  
H 21 1S( 0.82)  
H 22 1S( 0.83)  
C 23 [core]2S( 0.86)2p( 2.61)3S( 0.01)3p( 0.02)  
C 24 [core]2S( 1.02)2p( 3.56)3p( 0.01)  
H 25 1S( 0.79)  
H 26 1S( 0.79)  
H 27 1S( 0.79)  
C 28 [core]2S( 0.84)2p( 3.00)3p( 0.03)  
C 29 [core]2S( 0.90)2p( 3.07)3p( 0.03)  
C 30 [core]2S( 0.90)2p( 3.22)3p( 0.02)  
C 31 [core]2S( 0.93)2p( 3.20)3p( 0.02)  
C 32 [core]2S( 0.91)2p( 3.15)3p( 0.02)  
C 33 [core]2S( 0.93)2p( 3.26)3p( 0.02)  
C 34 [core]2S( 0.95)2p( 3.17)3p( 0.02)  
C 35 [core]2S( 1.01)2p( 3.49)3p( 0.01)  
H 36 1S( 0.83)



H 37 1S( 0.82)  
H 38 1S( 0.82)  
C 39 [core]2S( 1.01)2p( 3.49)3p( 0.01)  
H 40 1S( 0.83)  
H 41 1S( 0.82)  
H 42 1S( 0.82)  
C 43 [core]2S( 0.86)2p( 2.61)3S( 0.01)3p( 0.02)  
C 44 [core]2S( 1.02)2p( 3.56)3p( 0.01)  
H 45 1S( 0.79)  
H 46 1S( 0.79)  
H 47 1S( 0.79)  
C 48 [core]2S( 0.84)2p( 2.99)3p( 0.03)  
C 49 [core]2S( 0.89)2p( 3.11)3p( 0.02)  
C 50 [core]2S( 0.93)2p( 3.21)3p( 0.02)  
C 51 [core]2S( 0.93)2p( 3.18)3p( 0.02)  
C 52 [core]2S( 0.94)2p( 3.19)3p( 0.02)  
C 53 [core]2S( 0.92)2p( 3.26)3p( 0.02)  
C 54 [core]2S( 0.95)2p( 3.17)3p( 0.02)  
C 55 [core]2S( 1.01)2p( 3.50)3p( 0.01)  
H 56 1S( 0.82)  
H 57 1S( 0.82)  
H 58 1S( 0.84)  
C 59 [core]2S( 1.01)2p( 3.51)3p( 0.01)  
H 60 1S( 0.82)  
H 61 1S( 0.81)  
H 62 1S( 0.82)  
H 63 1S( 0.82)  
H 64 1S( 0.83)  
H 65 1S( 0.92)  
H 66 1S( 0.84)  
H 67 1S( 0.85)  
H 68 1S( 0.86)  
H 69 1S( 0.82)  
H 70 1S( 0.87)  
H 71 1S( 0.84)  
H 72 1S( 0.83)  
H 73 1S( 0.82)  
H 74 1S( 0.84)  
H 75 1S( 0.82)  
H 76 1S( 0.83)  
H 77 1S( 0.83)  
N 78 [core]2S( 1.36)2p( 4.28)3p( 0.02)  
N 79 [core]2S( 1.37)2p( 4.31)3p( 0.02)  
N 80 [core]2S( 1.36)2p( 4.32)3p( 0.03)  
Tl 81 [core]6S( 1.95)6p( 0.12)

NBO analysis skipped by request.

1|1|UNPC-E-C07CYG43063|SP|RHF|LANL2DZ|C34H43N3Tl1(1+)|MCDSTFM|15-Jan-2013|0|# rhf/lanl2dz pop=npa geom=connectivity||single-Point XRD Monomer||1,1|C,0,-0.6205,11.0173,13.3488|H,0,-1.1772,10.346,12.9002|C,0,-0.7386,10.7853,14.8523|C,0,-2.0146,10.1478,15.2951|H,0,-2.0164,10.0668,16.2521|H,0,-2.0905,9.2752,14.9004|H,0,-2.7571,10.6899,15.0181|C,0,0.1477,11.0887,17.0133|C,0,0.985,10.2079,17.6933|C,0,0.9712,10.2682,19.0865|C,0,0.1757,11.1851,19.7698|C,0,-0.6272,12.0471,19.0766|C,0,-0.643,11.9981,17.6933|C,0,1.8192,9.1837,16.9669|C,0,1.2049,7.8117,17.0863|H,0,1.2187,7.5343,18.0051|H,0,1.706,7.1888,16.5556|H,0,0.2964,7.8403,16.7745|C,0,3.2525,9.155,17.4114|H,0,3.6438,10.0232,17.287|H,0,3.7359,8.5075,16.8939|H,0,3.2939,8.9159,18.3418|C,0,-1.123,12.3888,12.9283|C,0,-1.6827,12.4638,11.5534|H,0,-1.9518,13.3661,11.366|H,0,-2.4428,11.8816,11.4854|H,0,-1.0127,12.193,10.9198|C,0,-1.289,14.7012,13.3745|C,0,-2.2986,15.3891,14.0528|C,0,-2.4429,16.7341,13.6979|C,0,-1.6719,17.3532,12.8

04|C,0,-0.6563,16.6662,12.1604|C,0,-0.4748,15.3276,12.454|C,0,-3.1018,  
14.7409,15.1408|C,0,-4.5972,15.0605,15.0712|H,0,-4.7206,16.0118,15.051  
3|H,0,-5.0382,14.6958,15.8407|H,0,-4.9686,14.6725,14.2751|C,0,-2.5564,  
15.1673,16.5058|H,0,-1.6294,14.924,16.5705|H,0,-3.0515,14.7244,17.2008  
|H,0,-2.6467,16.1173,16.6053|C,0,0.8149,10.8036,12.8925|C,0,1.185,9.39  
29,12.5668|H,0,2.0832,9.368,12.2268|H,0,0.5821,9.0478,11.905|H,0,1.128  
8,8.8555,13.3612|C,0,2.9692,11.7205,12.532|C,0,3.4312,12.2928,11.3444|  
C,0,4.8043,12.3003,11.1454|C,0,5.6765,11.7802,12.0742|C,0,5.2031,11.20  
58,13.2236|C,0,3.8453,11.1763,13.4607|C,0,2.4476,12.825,10.3294|C,0,1.  
935,11.6972,9.4454|H,0,2.6628,11.3347,8.9346|H,0,1.2641,12.0378,8.8483  
|H,0,1.5553,11.0076,9.9944|C,0,3.0076,13.9575,9.4603|H,0,3.4149,14.620  
1,10.0242|H,0,2.2939,14.3599,8.9595|H,0,3.6632,13.6032,8.8566|H,0,1.53  
76,9.6958,19.6056|H,0,0.2777,11.1745,20.6986|H,0,-1.0785,12.5752,19.40  
5|H,0,-1.1085,12.6356,17.1991|H,0,1.9153,9.4051,16.0879|H,0,-3.0335,17  
.0782,14.2137|H,0,-1.6683,18.2598,12.5386|H,0,-0.1278,17.0116,11.5932|  
H,0,0.1761,14.8424,12.0377|H,0,-3.0473,13.7776,15.0745|H,0,5.2053,12.7  
076,10.3908|H,0,6.5357,11.8968,11.8254|H,0,5.8118,10.8056,13.8323|H,0,  
3.5609,10.7602,14.2303|H,0,1.6499,13.1539,10.8187|N,0,0.2136,11.175,15  
.584|N,0,-0.9939,13.3524,13.7507|N,0,1.5756,11.8102,12.8487|Ti,0,1.393  
4,13.5394,14.8375||Version=IA32W-G09RevB.01|State=1-A|HF=-1524.6288676  
|RMSD=3.810e-009|Dipole=-0.9632388,-1.3085232,-1.0432729|Quadrupole=-0  
.8575993,-1.5876609,2.4452602,-5.316211,-5.0523255,-4.305488|PG=C01 [X  
(C34H43N3Ti1)]||@

GARLIC THEN HAVE POWER TO SAVE FROM DEATH  
BEAR WITH IT THOUGH IT MAKETH UNSAVORY BREATH,  
AND SCORN NOT GARLIC LIKE SOME THAT THINK  
IT ONLY MAKETH MEN WINK AND DRINK AND STINK.

-- SIR JOHN HARRINGTON,  
"THE ENGLISHMAN'S DOCTOR", 1609

Job cpu time: 0 days 1 hours 2 minutes 47.0 seconds.

File lengths (MBytes): RWF= 105 Int= 0 D2E= 0 Chk= 8 Scr= 1

Normal termination of Gaussian 09 at Tue Jan 15 12:19:55 2013.

## Appendix 2. Gaussian output for cation monomer, LANL2-DZ, DF-B3-LYP.

```
*****  
Gaussian 09: IA32W-G09RevB.01 12-Aug-2010  
03-Apr-2013  
*****  
%chk=\\vdm09-g1.ds.man.ac.uk\HOME\Desktop\cationOnly_1_1.chk  
-----  
# rb3lyp/lanl2dz pop=npa geom=connectivity  
-----  
1/38=1,57=2/1;  
2/12=2,17=6,18=5,40=1/2;  
3/5=6,6=3,11=2,16=1,25=1,30=1,74=-5,116=1/1,2,3;  
4//1;  
5/5=2,38=5/2;  
6/7=2,8=2,9=2,10=2,28=1,40=-1/1,7;  
99/5=1,9=1/99;  
-----  
single-Point XRD Monomer
```

-----  
Symbolic Z-matrix:

Charge = 1 Multiplicity = 1

|   |          |          |          |
|---|----------|----------|----------|
| C | 0.01861  | -0.08351 | 2.25597  |
| H | 0.00456  | -0.12271 | 3.2358   |
| C | 1.47569  | 0.03725  | 1.81938  |
| C | 2.38329  | 0.67877  | 2.81706  |
| H | 3.26891  | 0.74039  | 2.45059  |
| H | 2.405    | 0.1484   | 3.61782  |
| H | 2.06067  | 1.5589   | 3.02492  |
| C | 3.10026  | -0.2097  | 0.13198  |
| C | 3.90198  | -1.32752 | -0.08483 |
| C | 5.12032  | -1.11817 | -0.73032 |
| C | 5.50929  | 0.14744  | -1.16317 |
| C | 4.69675  | 1.22541  | -0.94872 |
| C | 3.48842  | 1.04715  | -0.2973  |
| C | 3.51104  | -2.69488 | 0.41518  |
| C | 4.30163  | -3.06022 | 1.64623  |
| H | 5.23077  | -3.13741 | 1.41802  |
| H | 3.98594  | -3.89728 | 1.99325  |
| H | 4.19153  | -2.37548 | 2.31138  |
| C | 3.6358   | -3.77042 | -0.62425 |
| H | 3.09152  | -3.54688 | -1.3833  |
| H | 3.34545  | -4.60758 | -0.25601 |
| H | 4.5541   | -3.84378 | -0.8997  |
| C | -0.81952 | 1.11086  | 1.83011  |
| C | -1.96396 | 1.43167  | 2.72262  |
| H | -2.44803 | 2.18018  | 2.36613  |
| H | -1.6356  | 1.64936  | 3.59791  |
| H | -2.54909 | 0.67131  | 2.77877  |
| C | -1.33857 | 2.73108  | 0.19324  |
| C | -0.81783 | 4.01916  | 0.044    |
| C | -1.65735 | 4.92744  | -0.60871 |
| C | -2.85938 | 4.61306  | -1.09147 |
| C | -3.35078 | 3.32491  | -0.96173 |
| C | -2.57581 | 2.38473  | -0.30867 |
| C | 0.57531  | 4.36278  | 0.48004  |
| C | 0.67719  | 5.7109   | 1.19795  |
| H | 0.29338  | 6.39655  | 0.64735  |
| H | 1.59896  | 5.91399  | 1.36741  |
| H | 0.20093  | 5.66457  | 2.03059  |
| C | 1.50797  | 4.36417  | -0.73349 |
| H | 1.48254  | 3.50282  | -1.15793 |
| H | 2.40618  | 4.5518   | -0.44657 |
| H | 1.22447  | 5.03721  | -1.35574 |
| C | -0.58311 | -1.38006 | 1.73526  |
| C | -0.36711 | -2.58269 | 2.59558  |
| H | -0.8368  | -3.33253 | 2.22126  |
| H | -0.69574 | -2.40764 | 3.47985  |
| H | 0.57179  | -2.78203 | 2.63748  |
| C | -1.70538 | -2.51767 | -0.01346 |
| C | -3.08873 | -2.65607 | -0.14969 |
| C | -3.53986 | -3.7369  | -0.89357 |
| C | -2.67156 | -4.62831 | -1.48123 |
| C | -1.31911 | -4.48681 | -1.31992 |
| C | -0.82805 | -3.42712 | -0.58738 |
| C | -4.01676 | -1.68089 | 0.53494  |
| C | -4.23979 | -2.08887 | 1.98406  |
| H | -4.68936 | -2.93687 | 2.0124   |
| H | -4.77882 | -1.42666 | 2.42402  |
| H | -3.39308 | -2.16106 | 2.43015  |
| C | -5.3658  | -1.5094  | -0.17371 |

|    |          |          |          |
|----|----------|----------|----------|
| H  | -5.21606 | -1.34668 | -1.10859 |
| H  | -5.83602 | -0.76444 | 0.20844  |
| H  | -5.8872  | -2.30716 | -0.06645 |
| H  | 5.70566  | -1.85291 | -0.91862 |
| H  | 6.32043  | 0.16932  | -1.62659 |
| H  | 4.86141  | 1.94149  | -1.17347 |
| H  | 2.87863  | 1.74723  | -0.22406 |
| H  | 2.61864  | -2.73301 | 0.59701  |
| H  | -1.22284 | 5.65839  | -0.70959 |
| H  | -3.46846 | 5.14421  | -1.58062 |
| H  | -4.10178 | 3.06548  | -1.2601  |
| H  | -2.87571 | 1.53075  | -0.19393 |
| H  | 0.90089  | 3.713    | 1.11808  |
| H  | -4.45796 | -3.88078 | -1.07388 |
| H  | -3.11043 | -5.2493  | -1.9665  |
| H  | -0.73302 | -5.13667 | -1.68785 |
| H  | 0.08401  | -3.37721 | -0.478   |
| H  | -3.55875 | -0.80222 | 0.58052  |
| N  | 1.77933  | -0.37223 | 0.66436  |
| N  | -0.50828 | 1.7062   | 0.74833  |
| N  | -1.1853  | -1.34684 | 0.62617  |
| Tl | -0.08843 | 0.10108  | -1.29192 |

Stoichiometry C<sub>34</sub>H<sub>43</sub>N<sub>3</sub>Tl(1+)

Framework group C1[X(C<sub>34</sub>H<sub>43</sub>N<sub>3</sub>Tl)]

Deg. of freedom 237

Full point group C1 NOp 1

Largest Abelian subgroup C1 NOp 1

Largest concise Abelian subgroup C1 NOp 1

Standard orientation:

| Center<br>Number | Atomic<br>Number | Atomic<br>Type | Coordinates (Angstroms) |           |           |
|------------------|------------------|----------------|-------------------------|-----------|-----------|
|                  |                  |                | X                       | Y         | Z         |
| 1                | 6                | 0              | 0.018610                | -0.083509 | 2.255965  |
| 2                | 1                | 0              | 0.004563                | -0.122705 | 3.235795  |
| 3                | 6                | 0              | 1.475694                | 0.037252  | 1.819378  |
| 4                | 6                | 0              | 2.383292                | 0.678775  | 2.817058  |
| 5                | 1                | 0              | 3.268909                | 0.740391  | 2.450589  |
| 6                | 1                | 0              | 2.404998                | 0.148406  | 3.617819  |
| 7                | 1                | 0              | 2.060673                | 1.558900  | 3.024916  |
| 8                | 6                | 0              | 3.100261                | -0.209695 | 0.131984  |
| 9                | 6                | 0              | 3.901980                | -1.327513 | -0.084833 |
| 10               | 6                | 0              | 5.120321                | -1.118168 | -0.730319 |
| 11               | 6                | 0              | 5.509287                | 0.147444  | -1.163167 |
| 12               | 6                | 0              | 4.696746                | 1.225409  | -0.948720 |
| 13               | 6                | 0              | 3.488420                | 1.047150  | -0.297304 |
| 14               | 6                | 0              | 3.511045                | -2.694881 | 0.415175  |
| 15               | 6                | 0              | 4.301634                | -3.060218 | 1.646233  |
| 16               | 1                | 0              | 5.230770                | -3.137411 | 1.418018  |
| 17               | 1                | 0              | 3.985944                | -3.897277 | 1.993251  |
| 18               | 1                | 0              | 4.191530                | -2.375478 | 2.311377  |
| 19               | 6                | 0              | 3.635799                | -3.770421 | -0.624249 |
| 20               | 1                | 0              | 3.091523                | -3.546874 | -1.383296 |
| 21               | 1                | 0              | 3.345450                | -4.607578 | -0.256005 |
| 22               | 1                | 0              | 4.554099                | -3.843774 | -0.899697 |
| 23               | 6                | 0              | -0.819519               | 1.110862  | 1.830107  |
| 24               | 6                | 0              | -1.963956               | 1.431665  | 2.722624  |
| 25               | 1                | 0              | -2.448032               | 2.180173  | 2.366134  |
| 26               | 1                | 0              | -1.635596               | 1.649363  | 3.597907  |
| 27               | 1                | 0              | -2.549088               | 0.671303  | 2.778766  |
| 28               | 6                | 0              | -1.338573               | 2.731075  | 0.193238  |

|    |    |   |           |           |           |
|----|----|---|-----------|-----------|-----------|
| 29 | 6  | 0 | -0.817834 | 4.019155  | 0.044002  |
| 30 | 6  | 0 | -1.657349 | 4.927438  | -0.608713 |
| 31 | 6  | 0 | -2.859384 | 4.613053  | -1.091473 |
| 32 | 6  | 0 | -3.350783 | 3.324903  | -0.961731 |
| 33 | 6  | 0 | -2.575809 | 2.384732  | -0.308671 |
| 34 | 6  | 0 | 0.575303  | 4.362779  | 0.480037  |
| 35 | 6  | 0 | 0.677183  | 5.710899  | 1.197953  |
| 36 | 1  | 0 | 0.293379  | 6.396553  | 0.647347  |
| 37 | 1  | 0 | 1.598951  | 5.913989  | 1.367410  |
| 38 | 1  | 0 | 0.200928  | 5.664574  | 2.030595  |
| 39 | 6  | 0 | 1.507963  | 4.364169  | -0.733490 |
| 40 | 1  | 0 | 1.482541  | 3.502823  | -1.157927 |
| 41 | 1  | 0 | 2.406172  | 4.551804  | -0.446567 |
| 42 | 1  | 0 | 1.224464  | 5.037209  | -1.355743 |
| 43 | 6  | 0 | -0.583106 | -1.380063 | 1.735256  |
| 44 | 6  | 0 | -0.367111 | -2.582691 | 2.595582  |
| 45 | 1  | 0 | -0.836792 | -3.332533 | 2.221255  |
| 46 | 1  | 0 | -0.695735 | -2.407636 | 3.479846  |
| 47 | 1  | 0 | 0.571791  | -2.782032 | 2.637478  |
| 48 | 6  | 0 | -1.705377 | -2.517674 | -0.013464 |
| 49 | 6  | 0 | -3.088726 | -2.656072 | -0.149691 |
| 50 | 6  | 0 | -3.539861 | -3.736900 | -0.893565 |
| 51 | 6  | 0 | -2.671559 | -4.628307 | -1.481231 |
| 52 | 6  | 0 | -1.319109 | -4.486815 | -1.319917 |
| 53 | 6  | 0 | -0.828042 | -3.427121 | -0.587380 |
| 54 | 6  | 0 | -4.016760 | -1.680896 | 0.534937  |
| 55 | 6  | 0 | -4.239787 | -2.088876 | 1.984061  |
| 56 | 1  | 0 | -4.689357 | -2.936873 | 2.012404  |
| 57 | 1  | 0 | -4.778819 | -1.426666 | 2.424024  |
| 58 | 1  | 0 | -3.393079 | -2.161065 | 2.430149  |
| 59 | 6  | 0 | -5.365799 | -1.509400 | -0.173705 |
| 60 | 1  | 0 | -5.216055 | -1.346686 | -1.108593 |
| 61 | 1  | 0 | -5.836014 | -0.764447 | 0.208441  |
| 62 | 1  | 0 | -5.887199 | -2.307166 | -0.066446 |
| 63 | 1  | 0 | 5.705661  | -1.852902 | -0.918624 |
| 64 | 1  | 0 | 6.320426  | 0.169324  | -1.626590 |
| 65 | 1  | 0 | 4.861410  | 1.941496  | -1.173468 |
| 66 | 1  | 0 | 2.878626  | 1.747233  | -0.224064 |
| 67 | 1  | 0 | 2.618645  | -2.733003 | 0.597007  |
| 68 | 1  | 0 | -1.222843 | 5.658390  | -0.709589 |
| 69 | 1  | 0 | -3.468467 | 5.144206  | -1.580622 |
| 70 | 1  | 0 | -4.101784 | 3.065479  | -1.260104 |
| 71 | 1  | 0 | -2.875715 | 1.530750  | -0.193932 |
| 72 | 1  | 0 | 0.900883  | 3.712997  | 1.118076  |
| 73 | 1  | 0 | -4.457956 | -3.880786 | -1.073882 |
| 74 | 1  | 0 | -3.110425 | -5.249299 | -1.966502 |
| 75 | 1  | 0 | -0.733019 | -5.136673 | -1.687849 |
| 76 | 1  | 0 | 0.084016  | -3.377206 | -0.477995 |
| 77 | 1  | 0 | -3.558751 | -0.802224 | 0.580520  |
| 78 | 7  | 0 | 1.779334  | -0.372226 | 0.664361  |
| 79 | 7  | 0 | -0.508285 | 1.706202  | 0.748331  |
| 80 | 7  | 0 | -1.185302 | -1.346836 | 0.626165  |
| 81 | 81 | 0 | -0.088425 | 0.101083  | -1.291919 |

-----  
Rotational constants (GHZ): 0.0954184 0.0934007 0.0606679

Standard basis: LANL2DZ (5D, 7F)

There are 437 symmetry adapted basis functions of A symmetry.

Integral buffers will be 262144 words long.

Raffenetti 2 integral format.

Two-electron integral symmetry is turned on.

437 basis functions, 1127 primitive gaussians, 439 cartesian basis functions

140 alpha electrons 140 beta electrons

nuclear repulsion energy 4616.8692356483 Hartrees.  
NAtoms= 81 NActive= 81 NUniq= 81 SFac= 1.00D+00 NATFMM= 50 NAOKFM=T Big=T  
One-electron integrals computed using PRISM.  
1 Symmetry operations used in ECPInt.  
ECPInt: NSHTT= 38503 NPrTT= 272384 LenC2= 34176 LenP2D= 128614.  
LDataN: DoStor=T MaxTD1= 6 Len= 172  
NBasis= 437 RedAO= T NBF= 437  
NBsUse= 437 1.00D-06 NBFU= 437  
Defaulting to unpruned grid for atomic number 81.  
Harris functional with IExCor= 402 diagonalized for initial guess.  
ExpMin= 4.44D-02 ExpMax= 5.91D+03 ExpMxC= 2.05D+02 IAcc=2 IRadAn= 0 AccDes= 0.00D+00  
HarFok: IExCor= 402 AccDes= 0.00D+00 IRadAn= 0 IDoV= 1  
ScaDFX= 1.000000 1.000000 1.000000 1.000000  
Defaulting to unpruned grid for atomic number 81.  
FoFCou: FMM=F IPFlag= 0 FMFlag= 100000 FMFlg1= 2001  
NFXFlg= 0 DoJE=T BraDBF=F KetDBF=T FulRan=T  
Omega= 0.000000 0.000000 1.000000 0.000000 0.000000 ICntrl= 500 IOpCl= 0  
NMat0= 1 NMatS0= 1 NMatT0= 0 NMatD0= 1 NMtDS0= 0 NMtDT0= 0  
IICent= 4 NGrid= 0.  
Petite list used in FoFCou.  
Initial guess orbital symmetries:  
Occupied (A)  
(A) (A) (A) (A) (A) (A) (A) (A) (A) (A) (A) (A) (A)  
(A) (A) (A) (A) (A) (A) (A) (A) (A) (A) (A) (A) (A)  
(A) (A) (A) (A) (A) (A) (A) (A) (A) (A) (A) (A) (A)  
(A) (A) (A) (A) (A) (A) (A) (A) (A) (A) (A) (A) (A)  
(A) (A) (A) (A) (A) (A) (A) (A) (A) (A) (A) (A) (A)  
(A) (A) (A) (A) (A) (A) (A) (A) (A) (A) (A) (A) (A)  
(A) (A) (A) (A) (A) (A) (A) (A) (A) (A) (A) (A) (A)  
(A) (A) (A) (A) (A) (A) (A) (A) (A) (A) (A) (A) (A)  
(A) (A) (A) (A) (A) (A) (A) (A) (A) (A) (A) (A) (A)  
(A) (A) (A) (A) (A) (A) (A) (A) (A) (A) (A) (A) (A)  
Virtual (A)  
(A) (A) (A) (A) (A) (A) (A) (A) (A) (A) (A) (A) (A)  
(A) (A) (A) (A) (A) (A) (A) (A) (A) (A) (A) (A) (A)  
(A) (A) (A) (A) (A) (A) (A) (A) (A) (A) (A) (A) (A)  
(A) (A) (A) (A) (A) (A) (A) (A) (A) (A) (A) (A) (A)  
(A) (A) (A) (A) (A) (A) (A) (A) (A) (A) (A) (A) (A)  
(A) (A) (A) (A) (A) (A) (A) (A) (A) (A) (A) (A) (A)  
(A) (A) (A) (A) (A) (A) (A) (A) (A) (A) (A) (A) (A)  
(A) (A) (A) (A) (A) (A) (A) (A) (A) (A) (A) (A) (A)  
(A) (A) (A) (A) (A) (A) (A) (A) (A) (A) (A) (A) (A)  
(A) (A) (A) (A) (A) (A) (A) (A) (A) (A) (A) (A) (A)  
(A) (A) (A) (A) (A) (A) (A) (A) (A) (A) (A) (A) (A)  
(A) (A) (A) (A) (A) (A) (A) (A) (A) (A) (A) (A) (A)  
(A) (A) (A) (A) (A) (A) (A) (A) (A) (A) (A) (A) (A)  
(A) (A) (A) (A) (A) (A) (A) (A) (A) (A) (A) (A) (A)  
(A) (A) (A) (A) (A) (A) (A) (A) (A) (A) (A) (A) (A)  
(A) (A) (A) (A) (A) (A) (A) (A) (A) (A) (A) (A) (A)  
(A) (A) (A) (A) (A) (A) (A) (A) (A) (A) (A) (A) (A)

The electronic state of the initial guess is 1-A.  
Requested convergence on RMS density matrix=1.00D-08 within 128 cycles.  
Requested convergence on MAX density matrix=1.00D-06.  
Requested convergence on energy=1.00D-06.

No special actions if energy rises.

Defaulting to unpruned grid for atomic number 81.

SCF Done: E(RB3LYP) = -1536.06076743 A.U. after 14 cycles

Convg = 0.5589D-08 -V/T = 2.0091

\*\*\*\*\*

Population analysis using the SCF density.

\*\*\*\*\*

Orbital symmetries:

Occupied (A) (A)

(A) (A) (A) (A) (A) (A) (A) (A) (A) (A) (A) (A)

(A) (A) (A) (A) (A) (A) (A) (A) (A) (A) (A) (A)

(A) (A) (A) (A) (A) (A) (A) (A) (A) (A) (A) (A)

(A) (A) (A) (A) (A) (A) (A) (A) (A) (A) (A) (A)

(A) (A) (A) (A) (A) (A) (A) (A) (A) (A) (A) (A)

(A) (A) (A) (A) (A) (A) (A) (A) (A) (A) (A) (A)

(A) (A) (A) (A) (A) (A) (A) (A) (A) (A) (A) (A)

(A) (A) (A) (A) (A) (A) (A) (A) (A) (A) (A) (A)

(A) (A) (A) (A) (A) (A) (A) (A) (A) (A) (A) (A)

(A) (A) (A) (A) (A) (A) (A) (A) (A) (A) (A) (A)

(A) (A) (A) (A) (A) (A) (A) (A) (A) (A) (A) (A)

(A) (A) (A) (A) (A) (A) (A) (A) (A) (A) (A) (A)

(A) (A) (A) (A) (A) (A) (A) (A) (A) (A) (A) (A)

Virtual (A) (A)

(A) (A) (A) (A) (A) (A) (A) (A) (A) (A) (A) (A)

(A) (A) (A) (A) (A) (A) (A) (A) (A) (A) (A) (A)

(A) (A) (A) (A) (A) (A) (A) (A) (A) (A) (A) (A)

(A) (A) (A) (A) (A) (A) (A) (A) (A) (A) (A) (A)

(A) (A) (A) (A) (A) (A) (A) (A) (A) (A) (A) (A)

(A) (A) (A) (A) (A) (A) (A) (A) (A) (A) (A) (A)

(A) (A) (A) (A) (A) (A) (A) (A) (A) (A) (A) (A)

(A) (A) (A) (A) (A) (A) (A) (A) (A) (A) (A) (A)

(A) (A) (A) (A) (A) (A) (A) (A) (A) (A) (A) (A)

(A) (A) (A) (A) (A) (A) (A) (A) (A) (A) (A) (A)

(A) (A) (A) (A) (A) (A) (A) (A) (A) (A) (A) (A)

(A) (A) (A) (A) (A) (A) (A) (A) (A) (A) (A) (A)

(A) (A) (A) (A) (A) (A) (A) (A) (A) (A) (A) (A)

(A) (A) (A) (A) (A) (A) (A) (A) (A) (A) (A) (A)

(A) (A) (A) (A) (A) (A) (A) (A) (A) (A) (A) (A)

(A) (A) (A) (A) (A) (A) (A) (A) (A) (A) (A) (A)

(A) (A) (A) (A) (A) (A) (A) (A) (A) (A) (A) (A)

(A) (A) (A) (A) (A) (A) (A) (A) (A) (A) (A) (A)

(A) (A) (A) (A) (A) (A) (A) (A) (A) (A) (A) (A)

(A) (A) (A) (A) (A) (A) (A) (A) (A) (A) (A) (A)

(A) (A) (A) (A) (A) (A) (A) (A) (A) (A) (A) (A)

(A) (A) (A) (A) (A) (A) (A) (A) (A) (A) (A) (A)

(A) (A) (A) (A) (A) (A) (A) (A) (A) (A) (A) (A)

(A) (A) (A) (A) (A) (A) (A) (A) (A) (A) (A) (A)

(A) (A) (A) (A) (A) (A) (A) (A) (A) (A) (A) (A)

(A) (A) (A) (A) (A) (A) (A) (A) (A) (A) (A) (A)

The electronic state is 1-A.

Alpha occ. eigenvalues -- -14.46067 -14.45824 -14.45645 -10.38160 -10.38047

Alpha occ. eigenvalues -- -10.37703 -10.32761 -10.32320 -10.32200 -10.32120

Alpha occ. eigenvalues -- -10.29136 -10.28950 -10.28710 -10.27688 -10.27382

Alpha occ. eigenvalues -- -10.27249 -10.27164 -10.26991 -10.26863 -10.26757

Alpha occ. eigenvalues -- -10.26713 -10.26651 -10.26532 -10.26529 -10.26523

Alpha occ. eigenvalues -- -10.26456 -10.26411 -10.26143 -10.25969 -10.25902

Alpha occ. eigenvalues -- -10.25497 -10.22364 -10.22258 -10.21747 -10.21616

Alpha occ. eigenvalues -- -10.21543 -10.21273 -1.09888 -1.07768 -1.07515

Alpha occ. eigenvalues -- -0.97988 -0.97020 -0.96615 -0.93410 -0.92095

Alpha occ. eigenvalues -- -0.91799 -0.91596 -0.89930 -0.89613 -0.87129

Alpha occ. eigenvalues -- -0.86528 -0.86029 -0.85551 -0.85250 -0.84931

Alpha occ. eigenvalues -- -0.84228 -0.83386 -0.83370 -0.83134 -0.83108

|                            |          |          |          |          |          |
|----------------------------|----------|----------|----------|----------|----------|
| Alpha occ. eigenvalues --  | -0.82961 | -0.81238 | -0.81015 | -0.80919 | -0.75881 |
| Alpha occ. eigenvalues --  | -0.75331 | -0.75287 | -0.74923 | -0.74651 | -0.73862 |
| Alpha occ. eigenvalues --  | -0.70213 | -0.69936 | -0.69586 | -0.68926 | -0.68556 |
| Alpha occ. eigenvalues --  | -0.67186 | -0.64341 | -0.63771 | -0.62364 | -0.61353 |
| Alpha occ. eigenvalues --  | -0.60977 | -0.60604 | -0.59802 | -0.59567 | -0.58748 |
| Alpha occ. eigenvalues --  | -0.58585 | -0.58294 | -0.58039 | -0.57679 | -0.57470 |
| Alpha occ. eigenvalues --  | -0.56805 | -0.56258 | -0.55887 | -0.55484 | -0.55374 |
| Alpha occ. eigenvalues --  | -0.54972 | -0.54881 | -0.54741 | -0.54456 | -0.54040 |
| Alpha occ. eigenvalues --  | -0.53818 | -0.52262 | -0.52162 | -0.52051 | -0.51507 |
| Alpha occ. eigenvalues --  | -0.51455 | -0.51214 | -0.50445 | -0.50319 | -0.50135 |
| Alpha occ. eigenvalues --  | -0.49836 | -0.49228 | -0.48623 | -0.48160 | -0.47994 |
| Alpha occ. eigenvalues --  | -0.47144 | -0.46770 | -0.46114 | -0.45912 | -0.44877 |
| Alpha occ. eigenvalues --  | -0.44805 | -0.44278 | -0.43648 | -0.43575 | -0.43314 |
| Alpha occ. eigenvalues --  | -0.43155 | -0.42754 | -0.42409 | -0.42109 | -0.42014 |
| Alpha occ. eigenvalues --  | -0.40928 | -0.40198 | -0.39886 | -0.37125 | -0.35063 |
| Alpha occ. eigenvalues --  | -0.34857 | -0.34211 | -0.33300 | -0.33024 | -0.32804 |
| Alpha virt. eigenvalues -- | -0.14977 | -0.14661 | -0.13090 | -0.11933 | -0.11442 |
| Alpha virt. eigenvalues -- | -0.10316 | -0.09478 | -0.09295 | -0.09130 | -0.08763 |
| Alpha virt. eigenvalues -- | -0.08370 | -0.06297 | -0.01248 | -0.00560 | 0.00139  |
| Alpha virt. eigenvalues -- | 0.01182  | 0.01961  | 0.02306  | 0.03099  | 0.04151  |
| Alpha virt. eigenvalues -- | 0.04620  | 0.04931  | 0.05030  | 0.05235  | 0.05422  |
| Alpha virt. eigenvalues -- | 0.05442  | 0.05788  | 0.06135  | 0.06318  | 0.06491  |
| Alpha virt. eigenvalues -- | 0.06837  | 0.07171  | 0.07224  | 0.07552  | 0.07816  |
| Alpha virt. eigenvalues -- | 0.08369  | 0.08579  | 0.08703  | 0.08820  | 0.09152  |
| Alpha virt. eigenvalues -- | 0.09394  | 0.09728  | 0.10175  | 0.10257  | 0.10731  |
| Alpha virt. eigenvalues -- | 0.10823  | 0.11221  | 0.11674  | 0.12086  | 0.12297  |
| Alpha virt. eigenvalues -- | 0.12611  | 0.12701  | 0.13299  | 0.13486  | 0.13632  |
| Alpha virt. eigenvalues -- | 0.13998  | 0.14384  | 0.14627  | 0.15202  | 0.15380  |
| Alpha virt. eigenvalues -- | 0.15763  | 0.16150  | 0.16196  | 0.16286  | 0.16872  |
| Alpha virt. eigenvalues -- | 0.17077  | 0.17163  | 0.17556  | 0.17684  | 0.18048  |
| Alpha virt. eigenvalues -- | 0.18403  | 0.18621  | 0.18846  | 0.19176  | 0.19576  |
| Alpha virt. eigenvalues -- | 0.19864  | 0.20184  | 0.20359  | 0.20866  | 0.21274  |
| Alpha virt. eigenvalues -- | 0.21708  | 0.22049  | 0.22365  | 0.22672  | 0.22925  |
| Alpha virt. eigenvalues -- | 0.23048  | 0.23263  | 0.23440  | 0.23792  | 0.24144  |
| Alpha virt. eigenvalues -- | 0.24227  | 0.24576  | 0.24938  | 0.25115  | 0.25219  |
| Alpha virt. eigenvalues -- | 0.25732  | 0.25910  | 0.26061  | 0.26454  | 0.26499  |
| Alpha virt. eigenvalues -- | 0.26784  | 0.27133  | 0.27493  | 0.27631  | 0.27863  |
| Alpha virt. eigenvalues -- | 0.28059  | 0.28407  | 0.28685  | 0.29211  | 0.29491  |
| Alpha virt. eigenvalues -- | 0.29972  | 0.30500  | 0.30672  | 0.30934  | 0.31175  |
| Alpha virt. eigenvalues -- | 0.31847  | 0.32216  | 0.32269  | 0.32401  | 0.33070  |
| Alpha virt. eigenvalues -- | 0.33181  | 0.33434  | 0.33822  | 0.34169  | 0.34230  |
| Alpha virt. eigenvalues -- | 0.34329  | 0.34802  | 0.35044  | 0.35131  | 0.35506  |
| Alpha virt. eigenvalues -- | 0.35957  | 0.36399  | 0.36778  | 0.36982  | 0.37290  |
| Alpha virt. eigenvalues -- | 0.37799  | 0.38038  | 0.38378  | 0.38596  | 0.39124  |
| Alpha virt. eigenvalues -- | 0.39251  | 0.39596  | 0.40316  | 0.40809  | 0.40962  |
| Alpha virt. eigenvalues -- | 0.41847  | 0.42258  | 0.42351  | 0.42515  | 0.42983  |
| Alpha virt. eigenvalues -- | 0.43427  | 0.43731  | 0.43947  | 0.44310  | 0.44589  |
| Alpha virt. eigenvalues -- | 0.45032  | 0.45482  | 0.45864  | 0.46323  | 0.46587  |
| Alpha virt. eigenvalues -- | 0.47086  | 0.47543  | 0.47697  | 0.48599  | 0.48987  |
| Alpha virt. eigenvalues -- | 0.49653  | 0.49970  | 0.50163  | 0.50584  | 0.50862  |
| Alpha virt. eigenvalues -- | 0.51231  | 0.51568  | 0.52517  | 0.53020  | 0.53522  |
| Alpha virt. eigenvalues -- | 0.53962  | 0.54683  | 0.55257  | 0.55561  | 0.56374  |
| Alpha virt. eigenvalues -- | 0.56741  | 0.57299  | 0.58660  | 0.59333  | 0.59578  |
| Alpha virt. eigenvalues -- | 0.61403  | 0.61981  | 0.62558  | 0.63364  | 0.64047  |
| Alpha virt. eigenvalues -- | 0.65097  | 0.65368  | 0.65987  | 0.66496  | 0.66786  |
| Alpha virt. eigenvalues -- | 0.67583  | 0.68066  | 0.68895  | 0.70132  | 0.71150  |
| Alpha virt. eigenvalues -- | 0.72163  | 0.72993  | 0.73964  | 0.75243  | 0.77078  |
| Alpha virt. eigenvalues -- | 0.78203  | 0.78872  | 0.79450  | 0.80986  | 0.88598  |
| Alpha virt. eigenvalues -- | 0.89478  | 0.90222  | 0.93047  | 0.93470  | 1.02039  |
| Alpha virt. eigenvalues -- | 1.02501  | 1.03175  | 1.04839  | 1.05491  | 1.05564  |
| Alpha virt. eigenvalues -- | 1.06202  | 1.09208  | 1.09851  | 1.11271  | 1.11841  |
| Alpha virt. eigenvalues -- | 1.12786  | 1.14247  | 1.14556  | 1.15717  | 1.16070  |



|                            |         |          |         |         |         |
|----------------------------|---------|----------|---------|---------|---------|
| Alpha virt. eigenvalues -- | 1.16952 | 1.17061  | 1.17570 | 1.17834 | 1.18255 |
| Alpha virt. eigenvalues -- | 1.18643 | 1.19527  | 1.20019 | 1.20163 | 1.21065 |
| Alpha virt. eigenvalues -- | 1.21391 | 1.21914  | 1.22282 | 1.22659 | 1.23423 |
| Alpha virt. eigenvalues -- | 1.24163 | 1.24724  | 1.25368 | 1.25506 | 1.25771 |
| Alpha virt. eigenvalues -- | 1.26097 | 1.26424  | 1.26936 | 1.27358 | 1.27997 |
| Alpha virt. eigenvalues -- | 1.28841 | 1.29158  | 1.29931 | 1.30502 | 1.30852 |
| Alpha virt. eigenvalues -- | 1.32262 | 1.32373  | 1.33183 | 1.34285 | 1.35148 |
| Alpha virt. eigenvalues -- | 1.35451 | 1.36376  | 1.37381 | 1.37857 | 1.38553 |
| Alpha virt. eigenvalues -- | 1.39648 | 1.40729  | 1.41538 | 1.42766 | 1.44595 |
| Alpha virt. eigenvalues -- | 1.46057 | 1.47175  | 1.47921 | 1.49048 | 1.50881 |
| Alpha virt. eigenvalues -- | 1.51643 | 1.52937  | 1.54545 | 1.55253 | 1.56392 |
| Alpha virt. eigenvalues -- | 1.58906 | 1.60527  | 1.60807 | 1.63041 | 1.65167 |
| Alpha virt. eigenvalues -- | 1.66316 | 1.68111  | 1.73415 | 1.80676 | 1.81752 |
| Alpha virt. eigenvalues -- | 1.91630 | 10.57886 |         |         |         |

Condensed to atoms (all electrons):

Mulliken atomic charges:

1

|      |           |
|------|-----------|
| 1 C  | -0.345637 |
| 2 H  | 0.261845  |
| 3 C  | 0.136261  |
| 4 C  | -0.784317 |
| 5 H  | 0.300981  |
| 6 H  | 0.277472  |
| 7 H  | 0.275783  |
| 8 C  | 0.042686  |
| 9 C  | 0.359054  |
| 10 C | -0.458715 |
| 11 C | -0.324979 |
| 12 C | -0.475370 |
| 13 C | -0.436250 |
| 14 C | -0.276589 |
| 15 C | -0.736780 |
| 16 H | 0.252459  |
| 17 H | 0.242144  |
| 18 H | 0.235857  |
| 19 C | -0.751775 |
| 20 H | 0.240684  |
| 21 H | 0.245516  |
| 22 H | 0.242444  |
| 23 C | 0.150880  |
| 24 C | -0.791223 |
| 25 H | 0.300635  |
| 26 H | 0.281527  |
| 27 H | 0.282342  |
| 28 C | 0.057885  |
| 29 C | 0.291357  |
| 30 C | -0.455316 |
| 31 C | -0.302448 |
| 32 C | -0.381474 |
| 33 C | -0.496997 |
| 34 C | -0.267020 |
| 35 C | -0.747159 |
| 36 H | 0.241692  |
| 37 H | 0.248789  |
| 38 H | 0.248500  |
| 39 C | -0.740936 |
| 40 H | 0.232808  |
| 41 H | 0.243249  |
| 42 H | 0.258595  |
| 43 C | 0.141358  |
| 44 C | -0.786800 |
| 45 H | 0.298653  |

46 H 0.278258  
47 H 0.279146  
48 C 0.082634  
49 C 0.302155  
50 C -0.442070  
51 C -0.337277  
52 C -0.283531  
53 C -0.479015  
54 C -0.227188  
55 C -0.747564  
56 H 0.259140  
57 H 0.247543  
58 H 0.239839  
59 C -0.755739  
60 H 0.248076  
61 H 0.249937  
62 H 0.239505  
63 H 0.312922  
64 H 0.314465  
65 H 0.506990  
66 H 0.335561  
67 H 0.266570  
68 H 0.381039  
69 H 0.306198  
70 H 0.407852  
71 H 0.367801  
72 H 0.239102  
73 H 0.319739  
74 H 0.345635  
75 H 0.311077  
76 H 0.365662  
77 H 0.215004  
78 N -0.212215  
79 N -0.231154  
80 N -0.237550  
81 Ti 0.699781

Sum of Mulliken atomic charges = 1.00000

Mulliken charges with hydrogens summed into heavy atoms:

1

1 C -0.083792  
3 C 0.136261  
4 C 0.069918  
8 C 0.042686  
9 C 0.359054  
10 C -0.145793  
11 C -0.010514  
12 C 0.031620  
13 C -0.100689  
14 C -0.010019  
15 C -0.006320  
19 C -0.023130  
23 C 0.150880  
24 C 0.073281  
28 C 0.057885  
29 C 0.291357  
30 C -0.074276  
31 C 0.003751  
32 C 0.026377  
33 C -0.129195  
34 C -0.027918  
35 C -0.008178  
39 C -0.006284

43 C 0.141358  
44 C 0.069258  
48 C 0.082634  
49 C 0.302155  
50 C -0.122331  
51 C 0.008357  
52 C 0.027546  
53 C -0.113353  
54 C -0.012185  
55 C -0.001043  
59 C -0.018221  
78 N -0.212215  
79 N -0.231154  
80 N -0.237550  
81 Ti 0.699781

Sum of Mulliken charges with hydrogens summed into heavy atoms = 1.00000

Electronic spatial extent (au):  $\langle R^{*2} \rangle =$  18924.6193

Charge= 1.0000 electrons

Dipole moment (field-independent basis, Debye):

X= -0.4921 Y= -0.4135 Z= 4.0742 Tot= 4.1246

Quadrupole moment (field-independent basis, Debye-Ang):

XX= -189.5188 YY= -191.1702 ZZ= -211.1044  
XY= 1.1969 XZ= 0.6882 YZ= -0.4394

Traceless Quadrupole moment (field-independent basis, Debye-Ang):

XX= 7.7457 YY= 6.0943 ZZ= -13.8400  
XY= 1.1969 XZ= 0.6882 YZ= -0.4394

Octapole moment (field-independent basis, Debye-Ang\*\*2):

XXX= -4.6716 YYY= 38.0961 ZZZ= -89.2270 XYY= -14.7519  
XXY= -33.5144 XXZ= -90.0328 XZZ= -7.2190 YZZ= 0.2380  
YYZ= -88.2014 XYZ= -0.9132

Hexadecapole moment (field-independent basis, Debye-Ang\*\*3):

XXXX= -10242.4267 YYYY= -10157.7575 ZZZZ= -2606.0210 XXXY= 3.1792  
XXXZ= -142.0794 YYYYX= 56.6727 YYYZ= 19.1741 ZZZX= 25.6691  
ZZZY= -11.6704 XXYY= -3366.2900 XXZZ= -2274.1099 YYZZ= -2210.0402  
XXYZ= -29.9268 YYXZ= 161.6365 ZZZY= 10.2778

N-N= 4.616869235648D+03 E-N=-1.277907172422D+04 KE= 1.522227716595D+03

\*\*\*\*\*Gaussian NBO Version 3.1\*\*\*\*\*

NATURAL ATOMIC ORBITAL AND  
NATURAL BOND ORBITAL ANALYSIS

\*\*\*\*\*Gaussian NBO Version 3.1\*\*\*\*\*

/RESON / : Allow strongly delocalized NBO set

Analyzing the SCF density

Job title: single-Point XRD Monomer

Storage needed: 593108 in NPA ( 33535799 available)

NATURAL POPULATIONS: Natural atomic orbital occupancies

| NAO | Atom | No | lang | Type(AO) | Occupancy | Energy    |
|-----|------|----|------|----------|-----------|-----------|
| 1   | C    | 1  | S    | Cor( 1S) | 1.99885   | -10.17823 |
| 2   | C    | 1  | S    | Val( 2S) | 0.96147   | -0.30265  |
| 3   | C    | 1  | S    | Ryd( 3S) | 0.00107   | 1.40050   |
| 4   | C    | 1  | px   | Val( 2p) | 1.07544   | -0.22540  |
| 5   | C    | 1  | px   | Ryd( 3p) | 0.00635   | 0.40913   |
| 6   | C    | 1  | py   | Val( 2p) | 1.07282   | -0.22533  |
| 7   | C    | 1  | py   | Ryd( 3p) | 0.00593   | 0.39310   |
| 8   | C    | 1  | pz   | Val( 2p) | 1.19714   | -0.17447  |
| 9   | C    | 1  | pz   | Ryd( 3p) | 0.01811   | 0.49910   |

|    |   |    |    |          |         |           |
|----|---|----|----|----------|---------|-----------|
| 10 | H | 2  | S  | Val( 1S) | 0.77396 | 0.06461   |
| 11 | H | 2  | S  | Ryd( 2S) | 0.00191 | 0.95067   |
| 12 | C | 3  | S  | Cor( 1S) | 1.99906 | -10.24722 |
| 13 | C | 3  | S  | Val( 2S) | 0.85454 | -0.26383  |
| 14 | C | 3  | S  | Ryd( 3S) | 0.00473 | 0.96572   |
| 15 | C | 3  | px | Val( 2p) | 0.96585 | -0.18186  |
| 16 | C | 3  | px | Ryd( 3p) | 0.00693 | 0.52953   |
| 17 | C | 3  | py | Val( 2p) | 0.83907 | -0.21953  |
| 18 | C | 3  | py | Ryd( 3p) | 0.00837 | 0.40414   |
| 19 | C | 3  | pz | Val( 2p) | 0.88277 | -0.13674  |
| 20 | C | 3  | pz | Ryd( 3p) | 0.00676 | 0.45364   |
| 21 | C | 4  | S  | Cor( 1S) | 1.99907 | -10.10342 |
| 22 | C | 4  | S  | Val( 2S) | 1.02364 | -0.23373  |
| 23 | C | 4  | S  | Ryd( 3S) | 0.00054 | 1.10653   |
| 24 | C | 4  | px | Val( 2p) | 1.20795 | -0.16145  |
| 25 | C | 4  | px | Ryd( 3p) | 0.00339 | 0.23328   |
| 26 | C | 4  | py | Val( 2p) | 1.21658 | -0.15400  |
| 27 | C | 4  | py | Ryd( 3p) | 0.00185 | 0.23721   |
| 28 | C | 4  | pz | Val( 2p) | 1.18886 | -0.16520  |
| 29 | C | 4  | pz | Ryd( 3p) | 0.00296 | 0.20000   |
| 30 | H | 5  | S  | Val( 1S) | 0.76986 | 0.09223   |
| 31 | H | 5  | S  | Ryd( 2S) | 0.00123 | 0.86155   |
| 32 | H | 6  | S  | Val( 1S) | 0.77304 | 0.07660   |
| 33 | H | 6  | S  | Ryd( 2S) | 0.00104 | 0.79982   |
| 34 | H | 7  | S  | Val( 1S) | 0.77323 | 0.07481   |
| 35 | H | 7  | S  | Ryd( 2S) | 0.00103 | 0.80112   |
| 36 | C | 8  | S  | Cor( 1S) | 1.99881 | -10.18644 |
| 37 | C | 8  | S  | Val( 2S) | 0.84527 | -0.20242  |
| 38 | C | 8  | S  | Ryd( 3S) | 0.00186 | 1.10551   |
| 39 | C | 8  | px | Val( 2p) | 0.88888 | -0.12982  |
| 40 | C | 8  | px | Ryd( 3p) | 0.00886 | 0.54268   |
| 41 | C | 8  | py | Val( 2p) | 1.08534 | -0.14524  |
| 42 | C | 8  | py | Ryd( 3p) | 0.00444 | 0.46859   |
| 43 | C | 8  | pz | Val( 2p) | 1.03212 | -0.19712  |
| 44 | C | 8  | pz | Ryd( 3p) | 0.01015 | 0.50054   |
| 45 | C | 9  | S  | Cor( 1S) | 1.99899 | -10.15023 |
| 46 | C | 9  | S  | Val( 2S) | 0.89236 | -0.20644  |
| 47 | C | 9  | S  | Ryd( 3S) | 0.00146 | 1.13947   |
| 48 | C | 9  | px | Val( 2p) | 1.05073 | -0.13701  |
| 49 | C | 9  | px | Ryd( 3p) | 0.00612 | 0.49689   |
| 50 | C | 9  | py | Val( 2p) | 1.05462 | -0.13202  |
| 51 | C | 9  | py | Ryd( 3p) | 0.00935 | 0.63543   |
| 52 | C | 9  | pz | Val( 2p) | 0.99956 | -0.16951  |
| 53 | C | 9  | pz | Ryd( 3p) | 0.00671 | 0.44914   |
| 54 | C | 10 | S  | Cor( 1S) | 1.99909 | -10.12148 |
| 55 | C | 10 | S  | Val( 2S) | 0.94051 | -0.19459  |
| 56 | C | 10 | S  | Ryd( 3S) | 0.00098 | 1.02364   |
| 57 | C | 10 | px | Val( 2p) | 1.08594 | -0.10559  |
| 58 | C | 10 | px | Ryd( 3p) | 0.00564 | 0.34590   |
| 59 | C | 10 | py | Val( 2p) | 1.12159 | -0.08377  |
| 60 | C | 10 | py | Ryd( 3p) | 0.00452 | 0.47351   |
| 61 | C | 10 | pz | Val( 2p) | 1.00561 | -0.16770  |
| 62 | C | 10 | pz | Ryd( 3p) | 0.00287 | 0.33541   |

|     |   |    |    |          |         |           |
|-----|---|----|----|----------|---------|-----------|
| 63  | C | 11 | S  | Cor( 1S) | 1.99922 | -10.12108 |
| 64  | C | 11 | S  | Val( 2S) | 0.94300 | -0.17917  |
| 65  | C | 11 | S  | Ryd( 3S) | 0.00073 | 0.92872   |
| 66  | C | 11 | px | Val( 2p) | 1.11961 | -0.06035  |
| 67  | C | 11 | px | Ryd( 3p) | 0.00595 | 0.34696   |
| 68  | C | 11 | py | Val( 2p) | 1.04428 | -0.10144  |
| 69  | C | 11 | py | Ryd( 3p) | 0.00304 | 0.37339   |
| 70  | C | 11 | pz | Val( 2p) | 1.02710 | -0.14414  |
| 71  | C | 11 | pz | Ryd( 3p) | 0.00341 | 0.32163   |
| 72  | C | 12 | S  | Cor( 1S) | 1.99860 | -10.07897 |
| 73  | C | 12 | S  | Val( 2S) | 0.87686 | -0.04148  |
| 74  | C | 12 | S  | Ryd( 3S) | 0.00046 | 0.93356   |
| 75  | C | 12 | px | Val( 2p) | 1.04962 | -0.11940  |
| 76  | C | 12 | px | Ryd( 3p) | 0.00305 | 0.37150   |
| 77  | C | 12 | py | Val( 2p) | 1.12539 | 0.06061   |
| 78  | C | 12 | py | Ryd( 3p) | 0.00590 | 0.30891   |
| 79  | C | 12 | pz | Val( 2p) | 1.01127 | -0.15385  |
| 80  | C | 12 | pz | Ryd( 3p) | 0.00315 | 0.30871   |
| 81  | C | 13 | S  | Cor( 1S) | 1.99908 | -10.12502 |
| 82  | C | 13 | S  | Val( 2S) | 0.93220 | -0.18576  |
| 83  | C | 13 | S  | Ryd( 3S) | 0.00101 | 1.08246   |
| 84  | C | 13 | px | Val( 2p) | 1.09385 | -0.10538  |
| 85  | C | 13 | px | Ryd( 3p) | 0.00373 | 0.44158   |
| 86  | C | 13 | py | Val( 2p) | 1.11245 | -0.08955  |
| 87  | C | 13 | py | Ryd( 3p) | 0.00742 | 0.40928   |
| 88  | C | 13 | pz | Val( 2p) | 1.04538 | -0.18510  |
| 89  | C | 13 | pz | Ryd( 3p) | 0.00355 | 0.38011   |
| 90  | C | 14 | S  | Cor( 1S) | 1.99897 | -10.11174 |
| 91  | C | 14 | S  | Val( 2S) | 0.92086 | -0.17825  |
| 92  | C | 14 | S  | Ryd( 3S) | 0.00049 | 1.40005   |
| 93  | C | 14 | px | Val( 2p) | 1.14888 | -0.05590  |
| 94  | C | 14 | px | Ryd( 3p) | 0.00842 | 0.39511   |
| 95  | C | 14 | py | Val( 2p) | 1.02246 | -0.13614  |
| 96  | C | 14 | py | Ryd( 3p) | 0.00437 | 0.39590   |
| 97  | C | 14 | pz | Val( 2p) | 1.03006 | -0.13302  |
| 98  | C | 14 | pz | Ryd( 3p) | 0.00304 | 0.39497   |
| 99  | C | 15 | S  | Cor( 1S) | 1.99918 | -10.05755 |
| 100 | C | 15 | S  | Val( 2S) | 1.01189 | -0.17118  |
| 101 | C | 15 | S  | Ryd( 3S) | 0.00044 | 1.06938   |
| 102 | C | 15 | px | Val( 2p) | 1.20146 | -0.10145  |
| 103 | C | 15 | px | Ryd( 3p) | 0.00181 | 0.20982   |
| 104 | C | 15 | py | Val( 2p) | 1.22679 | -0.09212  |
| 105 | C | 15 | py | Ryd( 3p) | 0.00255 | 0.25477   |
| 106 | C | 15 | pz | Val( 2p) | 1.13137 | -0.11532  |
| 107 | C | 15 | pz | Ryd( 3p) | 0.00335 | 0.25078   |
| 108 | H | 16 | S  | Val( 1S) | 0.79807 | 0.12125   |
| 109 | H | 16 | S  | Ryd( 2S) | 0.00154 | 0.80588   |
| 110 | H | 17 | S  | Val( 1S) | 0.79812 | 0.12164   |
| 111 | H | 17 | S  | Ryd( 2S) | 0.00132 | 0.79396   |
| 112 | H | 18 | S  | Val( 1S) | 0.80593 | 0.11278   |
| 113 | H | 18 | S  | Ryd( 2S) | 0.00127 | 0.83343   |
| 114 | C | 19 | S  | Cor( 1S) | 1.99919 | -10.05368 |
| 115 | C | 19 | S  | Val( 2S) | 1.00883 | -0.16711  |

|     |   |    |    |          |         |           |
|-----|---|----|----|----------|---------|-----------|
| 116 | C | 19 | S  | Ryd( 3S) | 0.00042 | 1.07018   |
| 117 | C | 19 | px | Val( 2p) | 1.24151 | -0.09272  |
| 118 | C | 19 | px | Ryd( 3p) | 0.00220 | 0.24474   |
| 119 | C | 19 | py | Val( 2p) | 1.15832 | -0.10646  |
| 120 | C | 19 | py | Ryd( 3p) | 0.00279 | 0.26979   |
| 121 | C | 19 | pz | Val( 2p) | 1.16343 | -0.10498  |
| 122 | C | 19 | pz | Ryd( 3p) | 0.00285 | 0.24722   |
| 123 | H | 20 | S  | Val( 1S) | 0.80214 | 0.11945   |
| 124 | H | 20 | S  | Ryd( 2S) | 0.00122 | 0.80525   |
| 125 | H | 21 | S  | Val( 1S) | 0.79798 | 0.12269   |
| 126 | H | 21 | S  | Ryd( 2S) | 0.00133 | 0.80984   |
| 127 | H | 22 | S  | Val( 1S) | 0.80417 | 0.11611   |
| 128 | H | 22 | S  | Ryd( 2S) | 0.00160 | 0.83814   |
| 129 | C | 23 | S  | Cor( 1S) | 1.99907 | -10.25071 |
| 130 | C | 23 | S  | Val( 2S) | 0.85588 | -0.26859  |
| 131 | C | 23 | S  | Ryd( 3S) | 0.00466 | 0.98341   |
| 132 | C | 23 | px | Val( 2p) | 0.92426 | -0.19745  |
| 133 | C | 23 | px | Ryd( 3p) | 0.00692 | 0.47526   |
| 134 | C | 23 | py | Val( 2p) | 0.88814 | -0.19480  |
| 135 | C | 23 | py | Ryd( 3p) | 0.00866 | 0.44836   |
| 136 | C | 23 | pz | Val( 2p) | 0.86846 | -0.15560  |
| 137 | C | 23 | pz | Ryd( 3p) | 0.00699 | 0.43547   |
| 138 | C | 24 | S  | Cor( 1S) | 1.99907 | -10.10434 |
| 139 | C | 24 | S  | Val( 2S) | 1.02132 | -0.23408  |
| 140 | C | 24 | S  | Ryd( 3S) | 0.00058 | 1.12788   |
| 141 | C | 24 | px | Val( 2p) | 1.16285 | -0.17238  |
| 142 | C | 24 | px | Ryd( 3p) | 0.00324 | 0.23615   |
| 143 | C | 24 | py | Val( 2p) | 1.25110 | -0.15304  |
| 144 | C | 24 | py | Ryd( 3p) | 0.00232 | 0.21037   |
| 145 | C | 24 | pz | Val( 2p) | 1.20291 | -0.16481  |
| 146 | C | 24 | pz | Ryd( 3p) | 0.00284 | 0.21778   |
| 147 | H | 25 | S  | Val( 1S) | 0.76964 | 0.08941   |
| 148 | H | 25 | S  | Ryd( 2S) | 0.00129 | 0.86432   |
| 149 | H | 26 | S  | Val( 1S) | 0.77072 | 0.07769   |
| 150 | H | 26 | S  | Ryd( 2S) | 0.00109 | 0.80310   |
| 151 | H | 27 | S  | Val( 1S) | 0.77325 | 0.06896   |
| 152 | H | 27 | S  | Ryd( 2S) | 0.00119 | 0.85552   |
| 153 | C | 28 | S  | Cor( 1S) | 1.99882 | -10.18747 |
| 154 | C | 28 | S  | Val( 2S) | 0.84601 | -0.20681  |
| 155 | C | 28 | S  | Ryd( 3S) | 0.00189 | 1.07416   |
| 156 | C | 28 | px | Val( 2p) | 0.99718 | -0.14674  |
| 157 | C | 28 | px | Ryd( 3p) | 0.00604 | 0.47160   |
| 158 | C | 28 | py | Val( 2p) | 0.98233 | -0.14024  |
| 159 | C | 28 | py | Ryd( 3p) | 0.00764 | 0.54521   |
| 160 | C | 28 | pz | Val( 2p) | 1.02870 | -0.19937  |
| 161 | C | 28 | pz | Ryd( 3p) | 0.00975 | 0.48189   |
| 162 | C | 29 | S  | Cor( 1S) | 1.99900 | -10.15377 |
| 163 | C | 29 | S  | Val( 2S) | 0.89260 | -0.21042  |
| 164 | C | 29 | S  | Ryd( 3S) | 0.00137 | 1.14676   |
| 165 | C | 29 | px | Val( 2p) | 1.04372 | -0.14084  |
| 166 | C | 29 | px | Ryd( 3p) | 0.00896 | 0.58575   |
| 167 | C | 29 | py | Val( 2p) | 1.04222 | -0.12811  |

|     |   |    |    |          |         |           |
|-----|---|----|----|----------|---------|-----------|
| 168 | C | 29 | py | Ryd( 3p) | 0.00617 | 0.50000   |
| 169 | C | 29 | pz | Val( 2p) | 0.99109 | -0.17322  |
| 170 | C | 29 | pz | Ryd( 3p) | 0.00758 | 0.44859   |
| 171 | C | 30 | S  | Cor( 1S) | 1.99889 | -10.09573 |
| 172 | C | 30 | S  | Val( 2S) | 0.89521 | -0.11227  |
| 173 | C | 30 | S  | Ryd( 3S) | 0.00094 | 1.01922   |
| 174 | C | 30 | px | Val( 2p) | 1.08726 | -0.08983  |
| 175 | C | 30 | px | Ryd( 3p) | 0.00273 | 0.48146   |
| 176 | C | 30 | py | Val( 2p) | 1.14060 | -0.04083  |
| 177 | C | 30 | py | Ryd( 3p) | 0.00767 | 0.31273   |
| 178 | C | 30 | pz | Val( 2p) | 1.00960 | -0.16918  |
| 179 | C | 30 | pz | Ryd( 3p) | 0.00250 | 0.35710   |
| 180 | C | 31 | S  | Cor( 1S) | 1.99922 | -10.12066 |
| 181 | C | 31 | S  | Val( 2S) | 0.93378 | -0.17285  |
| 182 | C | 31 | S  | Ryd( 3S) | 0.00085 | 0.94226   |
| 183 | C | 31 | px | Val( 2p) | 1.08831 | -0.07598  |
| 184 | C | 31 | px | Ryd( 3p) | 0.00408 | 0.36262   |
| 185 | C | 31 | py | Val( 2p) | 1.09262 | -0.09623  |
| 186 | C | 31 | py | Ryd( 3p) | 0.00477 | 0.35313   |
| 187 | C | 31 | pz | Val( 2p) | 1.03172 | -0.14245  |
| 188 | C | 31 | pz | Ryd( 3p) | 0.00355 | 0.32151   |
| 189 | C | 32 | S  | Cor( 1S) | 1.99905 | -10.10748 |
| 190 | C | 32 | S  | Val( 2S) | 0.91324 | -0.12777  |
| 191 | C | 32 | S  | Ryd( 3S) | 0.00065 | 0.91603   |
| 192 | C | 32 | px | Val( 2p) | 1.11127 | -0.02434  |
| 193 | C | 32 | px | Ryd( 3p) | 0.00619 | 0.30306   |
| 194 | C | 32 | py | Val( 2p) | 1.05079 | -0.10265  |
| 195 | C | 32 | py | Ryd( 3p) | 0.00312 | 0.37342   |
| 196 | C | 32 | pz | Val( 2p) | 1.01109 | -0.15632  |
| 197 | C | 32 | pz | Ryd( 3p) | 0.00353 | 0.30318   |
| 198 | C | 33 | S  | Cor( 1S) | 1.99906 | -10.12239 |
| 199 | C | 33 | S  | Val( 2S) | 0.92454 | -0.17958  |
| 200 | C | 33 | S  | Ryd( 3S) | 0.00100 | 1.04310   |
| 201 | C | 33 | px | Val( 2p) | 1.06634 | -0.14035  |
| 202 | C | 33 | px | Ryd( 3p) | 0.00537 | 0.38826   |
| 203 | C | 33 | py | Val( 2p) | 1.15410 | -0.06357  |
| 204 | C | 33 | py | Ryd( 3p) | 0.00611 | 0.39889   |
| 205 | C | 33 | pz | Val( 2p) | 1.05604 | -0.18926  |
| 206 | C | 33 | pz | Ryd( 3p) | 0.00339 | 0.39788   |
| 207 | C | 34 | S  | Cor( 1S) | 1.99911 | -10.13177 |
| 208 | C | 34 | S  | Val( 2S) | 0.94745 | -0.22701  |
| 209 | C | 34 | S  | Ryd( 3S) | 0.00051 | 1.39024   |
| 210 | C | 34 | px | Val( 2p) | 1.03163 | -0.13494  |
| 211 | C | 34 | px | Ryd( 3p) | 0.00381 | 0.32257   |
| 212 | C | 34 | py | Val( 2p) | 1.09350 | -0.12043  |
| 213 | C | 34 | py | Ryd( 3p) | 0.00729 | 0.47413   |
| 214 | C | 34 | pz | Val( 2p) | 1.07296 | -0.11484  |
| 215 | C | 34 | pz | Ryd( 3p) | 0.00446 | 0.37496   |
| 216 | C | 35 | S  | Cor( 1S) | 1.99917 | -10.05775 |
| 217 | C | 35 | S  | Val( 2S) | 1.01282 | -0.17233  |
| 218 | C | 35 | S  | Ryd( 3S) | 0.00039 | 1.07031   |
| 219 | C | 35 | px | Val( 2p) | 1.24284 | -0.09062  |
| 220 | C | 35 | px | Ryd( 3p) | 0.00232 | 0.25314   |
| 221 | C | 35 | py | Val( 2p) | 1.10951 | -0.11659  |
| 222 | C | 35 | py | Ryd( 3p) | 0.00259 | 0.23107   |
| 223 | C | 35 | pz | Val( 2p) | 1.20399 | -0.09909  |

|     |   |    |    |          |         |           |
|-----|---|----|----|----------|---------|-----------|
| 224 | C | 35 | pz | Ryd( 3p) | 0.00313 | 0.23186   |
| 225 | H | 36 | S  | Val( 1S) | 0.80633 | 0.11297   |
| 226 | H | 36 | S  | Ryd( 2S) | 0.00142 | 0.82686   |
| 227 | H | 37 | S  | Val( 1S) | 0.79566 | 0.12557   |
| 228 | H | 37 | S  | Ryd( 2S) | 0.00128 | 0.80111   |
| 229 | H | 38 | S  | Val( 1S) | 0.79783 | 0.12467   |
| 230 | H | 38 | S  | Ryd( 2S) | 0.00122 | 0.79038   |
| 231 | C | 39 | S  | Cor( 1S) | 1.99918 | -10.06503 |
| 232 | C | 39 | S  | Val( 2S) | 1.01292 | -0.17710  |
| 233 | C | 39 | S  | Ryd( 3S) | 0.00049 | 1.07002   |
| 234 | C | 39 | px | Val( 2p) | 1.17954 | -0.11224  |
| 235 | C | 39 | px | Ryd( 3p) | 0.00296 | 0.30469   |
| 236 | C | 39 | py | Val( 2p) | 1.23437 | -0.09555  |
| 237 | C | 39 | py | Ryd( 3p) | 0.00274 | 0.28344   |
| 238 | C | 39 | pz | Val( 2p) | 1.14023 | -0.11852  |
| 239 | C | 39 | pz | Ryd( 3p) | 0.00245 | 0.25918   |
| 240 | H | 40 | S  | Val( 1S) | 0.81209 | 0.10457   |
| 241 | H | 40 | S  | Ryd( 2S) | 0.00119 | 0.85759   |
| 242 | H | 41 | S  | Val( 1S) | 0.79679 | 0.11740   |
| 243 | H | 41 | S  | Ryd( 2S) | 0.00131 | 0.79134   |
| 244 | H | 42 | S  | Val( 1S) | 0.79808 | 0.12158   |
| 245 | H | 42 | S  | Ryd( 2S) | 0.00143 | 0.84430   |
| 246 | C | 43 | S  | Cor( 1S) | 1.99905 | -10.25074 |
| 247 | C | 43 | S  | Val( 2S) | 0.85403 | -0.26639  |
| 248 | C | 43 | S  | Ryd( 3S) | 0.00485 | 0.96548   |
| 249 | C | 43 | px | Val( 2p) | 0.82861 | -0.21204  |
| 250 | C | 43 | px | Ryd( 3p) | 0.00906 | 0.43831   |
| 251 | C | 43 | py | Val( 2p) | 0.98184 | -0.18769  |
| 252 | C | 43 | py | Ryd( 3p) | 0.00627 | 0.53732   |
| 253 | C | 43 | pz | Val( 2p) | 0.86941 | -0.14923  |
| 254 | C | 43 | pz | Ryd( 3p) | 0.00696 | 0.44083   |
| 255 | C | 44 | S  | Cor( 1S) | 1.99907 | -10.10650 |
| 256 | C | 44 | S  | Val( 2S) | 1.02293 | -0.23659  |
| 257 | C | 44 | S  | Ryd( 3S) | 0.00057 | 1.11131   |
| 258 | C | 44 | px | Val( 2p) | 1.24905 | -0.15192  |
| 259 | C | 44 | px | Ryd( 3p) | 0.00152 | 0.24298   |
| 260 | C | 44 | py | Val( 2p) | 1.16004 | -0.17522  |
| 261 | C | 44 | py | Ryd( 3p) | 0.00381 | 0.23140   |
| 262 | C | 44 | pz | Val( 2p) | 1.20613 | -0.16383  |
| 263 | C | 44 | pz | Ryd( 3p) | 0.00271 | 0.21375   |
| 264 | H | 45 | S  | Val( 1S) | 0.76997 | 0.08805   |
| 265 | H | 45 | S  | Ryd( 2S) | 0.00125 | 0.85407   |
| 266 | H | 46 | S  | Val( 1S) | 0.77360 | 0.07630   |
| 267 | H | 46 | S  | Ryd( 2S) | 0.00101 | 0.80367   |
| 268 | H | 47 | S  | Val( 1S) | 0.77039 | 0.07366   |
| 269 | H | 47 | S  | Ryd( 2S) | 0.00108 | 0.83039   |
| 270 | C | 48 | S  | Cor( 1S) | 1.99882 | -10.19319 |
| 271 | C | 48 | S  | Val( 2S) | 0.84400 | -0.20950  |
| 272 | C | 48 | S  | Ryd( 3S) | 0.00193 | 1.09493   |



|     |   |    |    |          |         |           |
|-----|---|----|----|----------|---------|-----------|
| 273 | C | 48 | px | Val( 2p) | 1.06694 | -0.14786  |
| 274 | C | 48 | px | Ryd( 3p) | 0.00570 | 0.51649   |
| 275 | C | 48 | py | Val( 2p) | 0.91875 | -0.14584  |
| 276 | C | 48 | py | Ryd( 3p) | 0.00701 | 0.50163   |
| 277 | C | 48 | pz | Val( 2p) | 1.02050 | -0.19595  |
| 278 | C | 48 | pz | Ryd( 3p) | 0.01031 | 0.50461   |
| 279 | C | 49 | S  | Cor( 1S) | 1.99897 | -10.15331 |
| 280 | C | 49 | S  | Val( 2S) | 0.89025 | -0.20885  |
| 281 | C | 49 | S  | Ryd( 3S) | 0.00134 | 1.13968   |
| 282 | C | 49 | px | Val( 2p) | 1.05840 | -0.13353  |
| 283 | C | 49 | px | Ryd( 3p) | 0.00740 | 0.58215   |
| 284 | C | 49 | py | Val( 2p) | 1.04189 | -0.15077  |
| 285 | C | 49 | py | Ryd( 3p) | 0.00713 | 0.49129   |
| 286 | C | 49 | pz | Val( 2p) | 1.00988 | -0.16944  |
| 287 | C | 49 | pz | Ryd( 3p) | 0.00720 | 0.46459   |
| 288 | C | 50 | S  | Cor( 1S) | 1.99907 | -10.11805 |
| 289 | C | 50 | S  | Val( 2S) | 0.93192 | -0.18389  |
| 290 | C | 50 | S  | Ryd( 3S) | 0.00094 | 1.02161   |
| 291 | C | 50 | px | Val( 2p) | 1.16585 | -0.06050  |
| 292 | C | 50 | px | Ryd( 3p) | 0.00690 | 0.38882   |
| 293 | C | 50 | py | Val( 2p) | 1.03835 | -0.13542  |
| 294 | C | 50 | py | Ryd( 3p) | 0.00308 | 0.40103   |
| 295 | C | 50 | pz | Val( 2p) | 1.01331 | -0.16137  |
| 296 | C | 50 | pz | Ryd( 3p) | 0.00302 | 0.33869   |
| 297 | C | 51 | S  | Cor( 1S) | 1.99915 | -10.11084 |
| 298 | C | 51 | S  | Val( 2S) | 0.92699 | -0.15757  |
| 299 | C | 51 | S  | Ryd( 3S) | 0.00068 | 0.92099   |
| 300 | C | 51 | px | Val( 2p) | 1.07423 | -0.07802  |
| 301 | C | 51 | px | Ryd( 3p) | 0.00331 | 0.38517   |
| 302 | C | 51 | py | Val( 2p) | 1.08793 | -0.09476  |
| 303 | C | 51 | py | Ryd( 3p) | 0.00552 | 0.31619   |
| 304 | C | 51 | pz | Val( 2p) | 1.03803 | -0.13268  |
| 305 | C | 51 | pz | Ryd( 3p) | 0.00369 | 0.31218   |
| 306 | C | 52 | S  | Cor( 1S) | 1.99921 | -10.12840 |
| 307 | C | 52 | S  | Val( 2S) | 0.94036 | -0.18890  |
| 308 | C | 52 | S  | Ryd( 3S) | 0.00075 | 0.92157   |
| 309 | C | 52 | px | Val( 2p) | 1.10138 | -0.08499  |
| 310 | C | 52 | px | Ryd( 3p) | 0.00477 | 0.36204   |
| 311 | C | 52 | py | Val( 2p) | 1.07820 | -0.10031  |
| 312 | C | 52 | py | Ryd( 3p) | 0.00455 | 0.34307   |
| 313 | C | 52 | pz | Val( 2p) | 1.02182 | -0.15580  |
| 314 | C | 52 | pz | Ryd( 3p) | 0.00352 | 0.30907   |
| 315 | C | 53 | S  | Cor( 1S) | 1.99906 | -10.12647 |
| 316 | C | 53 | S  | Val( 2S) | 0.92450 | -0.18435  |
| 317 | C | 53 | S  | Ryd( 3S) | 0.00106 | 1.04226   |
| 318 | C | 53 | px | Val( 2p) | 1.16421 | -0.05392  |
| 319 | C | 53 | px | Ryd( 3p) | 0.00756 | 0.39307   |
| 320 | C | 53 | py | Val( 2p) | 1.05528 | -0.16014  |
| 321 | C | 53 | py | Ryd( 3p) | 0.00379 | 0.38611   |
| 322 | C | 53 | pz | Val( 2p) | 1.05467 | -0.18423  |
| 323 | C | 53 | pz | Ryd( 3p) | 0.00335 | 0.38415   |
| 324 | C | 54 | S  | Cor( 1S) | 1.99915 | -10.13769 |
| 325 | C | 54 | S  | Val( 2S) | 0.95187 | -0.23911  |
| 326 | C | 54 | S  | Ryd( 3S) | 0.00052 | 1.42055   |
| 327 | C | 54 | px | Val( 2p) | 1.04990 | -0.13657  |
| 328 | C | 54 | px | Ryd( 3p) | 0.00613 | 0.48979   |

|     |   |    |    |          |         |           |
|-----|---|----|----|----------|---------|-----------|
| 329 | C | 54 | py | Val( 2p) | 1.12775 | -0.10814  |
| 330 | C | 54 | py | Ryd( 3p) | 0.00664 | 0.33244   |
| 331 | C | 54 | pz | Val( 2p) | 1.01167 | -0.14255  |
| 332 | C | 54 | pz | Ryd( 3p) | 0.00274 | 0.38700   |
| 333 | C | 55 | S  | Cor( 1S) | 1.99916 | -10.06492 |
| 334 | C | 55 | S  | Val( 2S) | 1.01167 | -0.17896  |
| 335 | C | 55 | S  | Ryd( 3S) | 0.00047 | 1.07575   |
| 336 | C | 55 | px | Val( 2p) | 1.22696 | -0.09705  |
| 337 | C | 55 | px | Ryd( 3p) | 0.00267 | 0.24345   |
| 338 | C | 55 | py | Val( 2p) | 1.23709 | -0.10166  |
| 339 | C | 55 | py | Ryd( 3p) | 0.00202 | 0.26222   |
| 340 | C | 55 | pz | Val( 2p) | 1.09211 | -0.13308  |
| 341 | C | 55 | pz | Ryd( 3p) | 0.00330 | 0.25454   |
| 342 | H | 56 | S  | Val( 1S) | 0.79505 | 0.12187   |
| 343 | H | 56 | S  | Ryd( 2S) | 0.00160 | 0.81022   |
| 344 | H | 57 | S  | Val( 1S) | 0.79665 | 0.11565   |
| 345 | H | 57 | S  | Ryd( 2S) | 0.00133 | 0.78894   |
| 346 | H | 58 | S  | Val( 1S) | 0.81619 | 0.09712   |
| 347 | H | 58 | S  | Ryd( 2S) | 0.00157 | 0.92973   |
| 348 | C | 59 | S  | Cor( 1S) | 1.99917 | -10.05966 |
| 349 | C | 59 | S  | Val( 2S) | 1.01302 | -0.17565  |
| 350 | C | 59 | S  | Ryd( 3S) | 0.00044 | 1.07304   |
| 351 | C | 59 | px | Val( 2p) | 1.11690 | -0.11876  |
| 352 | C | 59 | px | Ryd( 3p) | 0.00292 | 0.24587   |
| 353 | C | 59 | py | Val( 2p) | 1.24309 | -0.09318  |
| 354 | C | 59 | py | Ryd( 3p) | 0.00225 | 0.25650   |
| 355 | C | 59 | pz | Val( 2p) | 1.20860 | -0.09957  |
| 356 | C | 59 | pz | Ryd( 3p) | 0.00302 | 0.25099   |
| 357 | H | 60 | S  | Val( 1S) | 0.79638 | 0.12210   |
| 358 | H | 60 | S  | Ryd( 2S) | 0.00119 | 0.80085   |
| 359 | H | 61 | S  | Val( 1S) | 0.79349 | 0.12590   |
| 360 | H | 61 | S  | Ryd( 2S) | 0.00116 | 0.82659   |
| 361 | H | 62 | S  | Val( 1S) | 0.80066 | 0.11624   |
| 362 | H | 62 | S  | Ryd( 2S) | 0.00161 | 0.79331   |
| 363 | H | 63 | S  | Val( 1S) | 0.81171 | 0.14245   |
| 364 | H | 63 | S  | Ryd( 2S) | 0.00156 | 0.91368   |
| 365 | H | 64 | S  | Val( 1S) | 0.81722 | 0.17625   |
| 366 | H | 64 | S  | Ryd( 2S) | 0.00163 | 0.85488   |
| 367 | H | 65 | S  | Val( 1S) | 0.90275 | 0.31958   |
| 368 | H | 65 | S  | Ryd( 2S) | 0.00193 | 0.74535   |
| 369 | H | 66 | S  | Val( 1S) | 0.82490 | 0.14493   |
| 370 | H | 66 | S  | Ryd( 2S) | 0.00173 | 0.96546   |
| 371 | H | 67 | S  | Val( 1S) | 0.83380 | 0.18341   |
| 372 | H | 67 | S  | Ryd( 2S) | 0.00308 | 0.88845   |
| 373 | H | 68 | S  | Val( 1S) | 0.84735 | 0.23812   |
| 374 | H | 68 | S  | Ryd( 2S) | 0.00227 | 0.88681   |
| 375 | H | 69 | S  | Val( 1S) | 0.80755 | 0.16359   |

|     |    |    |    |          |         |           |
|-----|----|----|----|----------|---------|-----------|
| 376 | H  | 69 | S  | Ryd( 2S) | 0.00187 | 0.86588   |
| 377 | H  | 70 | S  | Val( 1S) | 0.85901 | 0.24626   |
| 378 | H  | 70 | S  | Ryd( 2S) | 0.00166 | 0.80358   |
| 379 | H  | 71 | S  | Val( 1S) | 0.83087 | 0.16039   |
| 380 | H  | 71 | S  | Ryd( 2S) | 0.00160 | 0.95580   |
| 381 | H  | 72 | S  | Val( 1S) | 0.81340 | 0.13279   |
| 382 | H  | 72 | S  | Ryd( 2S) | 0.00271 | 0.88587   |
| 383 | H  | 73 | S  | Val( 1S) | 0.81282 | 0.15077   |
| 384 | H  | 73 | S  | Ryd( 2S) | 0.00165 | 0.91122   |
| 385 | H  | 74 | S  | Val( 1S) | 0.82711 | 0.20420   |
| 386 | H  | 74 | S  | Ryd( 2S) | 0.00188 | 0.84901   |
| 387 | H  | 75 | S  | Val( 1S) | 0.81024 | 0.15343   |
| 388 | H  | 75 | S  | Ryd( 2S) | 0.00142 | 0.86362   |
| 389 | H  | 76 | S  | Val( 1S) | 0.82192 | 0.15694   |
| 390 | H  | 76 | S  | Ryd( 2S) | 0.00157 | 0.93041   |
| 391 | H  | 77 | S  | Val( 1S) | 0.81379 | 0.09645   |
| 392 | H  | 77 | S  | Ryd( 2S) | 0.00261 | 0.93724   |
| 393 | N  | 78 | S  | Cor( 1S) | 1.99936 | -14.27015 |
| 394 | N  | 78 | S  | Val( 2S) | 1.35906 | -0.64535  |
| 395 | N  | 78 | S  | Ryd( 3S) | 0.00212 | 1.64127   |
| 396 | N  | 78 | px | Val( 2p) | 1.45024 | -0.33403  |
| 397 | N  | 78 | px | Ryd( 3p) | 0.01087 | 0.84700   |
| 398 | N  | 78 | py | Val( 2p) | 1.32774 | -0.33066  |
| 399 | N  | 78 | py | Ryd( 3p) | 0.00533 | 0.66485   |
| 400 | N  | 78 | pz | Val( 2p) | 1.43505 | -0.35864  |
| 401 | N  | 78 | pz | Ryd( 3p) | 0.00688 | 0.63682   |
| 402 | N  | 79 | S  | Cor( 1S) | 1.99938 | -14.27255 |
| 403 | N  | 79 | S  | Val( 2S) | 1.36445 | -0.65274  |
| 404 | N  | 79 | S  | Ryd( 3S) | 0.00219 | 1.63845   |
| 405 | N  | 79 | px | Val( 2p) | 1.52834 | -0.34979  |
| 406 | N  | 79 | px | Ryd( 3p) | 0.00763 | 0.69805   |
| 407 | N  | 79 | py | Val( 2p) | 1.29796 | -0.32967  |
| 408 | N  | 79 | py | Ryd( 3p) | 0.00796 | 0.81545   |
| 409 | N  | 79 | pz | Val( 2p) | 1.40540 | -0.35811  |
| 410 | N  | 79 | pz | Ryd( 3p) | 0.00643 | 0.63748   |
| 411 | N  | 80 | S  | Cor( 1S) | 1.99935 | -14.27397 |
| 412 | N  | 80 | S  | Val( 2S) | 1.35429 | -0.65040  |
| 413 | N  | 80 | S  | Ryd( 3S) | 0.00228 | 1.64037   |
| 414 | N  | 80 | px | Val( 2p) | 1.27512 | -0.33382  |
| 415 | N  | 80 | px | Ryd( 3p) | 0.00582 | 0.72062   |
| 416 | N  | 80 | py | Val( 2p) | 1.57002 | -0.35366  |
| 417 | N  | 80 | py | Ryd( 3p) | 0.01116 | 0.79622   |
| 418 | N  | 80 | pz | Val( 2p) | 1.39683 | -0.36244  |
| 419 | N  | 80 | pz | Ryd( 3p) | 0.00643 | 0.65260   |
| 420 | Tl | 81 | S  | Val( 6S) | 1.95204 | -0.41212  |
| 421 | Tl | 81 | S  | Ryd( 7S) | 0.00019 | 10.33245  |
| 422 | Tl | 81 | px | Val( 6p) | 0.03081 | -0.07738  |
| 423 | Tl | 81 | px | Ryd( 7p) | 0.00144 | 0.28427   |
| 424 | Tl | 81 | py | Val( 6p) | 0.02918 | -0.06861  |
| 425 | Tl | 81 | py | Ryd( 7p) | 0.00168 | 0.30558   |

|     |    |    |       |          |         |          |
|-----|----|----|-------|----------|---------|----------|
| 426 | Tl | 81 | pz    | Val( 6p) | 0.09308 | -0.03013 |
| 427 | Tl | 81 | pz    | Ryd( 7p) | 0.00234 | 0.38458  |
| 428 | Tl | 81 | dxy   | Cor( 5d) | 1.99814 | -0.83170 |
| 429 | Tl | 81 | dxy   | Ryd( 6d) | 0.00007 | 1.40745  |
| 430 | Tl | 81 | dxz   | Cor( 5d) | 1.99759 | -0.82763 |
| 431 | Tl | 81 | dxz   | Ryd( 6d) | 0.00016 | 1.48405  |
| 432 | Tl | 81 | dyz   | Cor( 5d) | 1.99709 | -0.82704 |
| 433 | Tl | 81 | dyz   | Ryd( 6d) | 0.00018 | 1.51843  |
| 434 | Tl | 81 | dx2y2 | Cor( 5d) | 1.99798 | -0.83182 |
| 435 | Tl | 81 | dx2y2 | Ryd( 6d) | 0.00005 | 1.41231  |
| 436 | Tl | 81 | dz2   | Cor( 5d) | 1.99743 | -0.82763 |
| 437 | Tl | 81 | dz2   | Ryd( 6d) | 0.00010 | 1.44805  |

[ 68 electrons found in the effective core potential]

WARNING: 1 low occupancy (<1.9990e) core orbital found on C 1

- 1 low occupancy (<1.9990e) core orbital found on C 8
- 1 low occupancy (<1.9990e) core orbital found on C 9
- 1 low occupancy (<1.9990e) core orbital found on C 12
- 1 low occupancy (<1.9990e) core orbital found on C 14
- 1 low occupancy (<1.9990e) core orbital found on C 28
- 1 low occupancy (<1.9990e) core orbital found on C 29
- 1 low occupancy (<1.9990e) core orbital found on C 30
- 1 low occupancy (<1.9990e) core orbital found on C 48
- 1 low occupancy (<1.9990e) core orbital found on C 49
- 5 low occupancy (<1.9990e) core orbitals found on Tl 81

Summary of Natural Population Analysis:

|      |    | Natural Population |         |         |         |         |
|------|----|--------------------|---------|---------|---------|---------|
| Atom | No | Charge             | Core    | Valence | Rydberg | Total   |
| C    | 1  | -0.33719           | 1.99885 | 4.30687 | 0.03147 | 6.33719 |
| H    | 2  | 0.22412            | 0.00000 | 0.77396 | 0.00191 | 0.77588 |
| C    | 3  | 0.43191            | 1.99906 | 3.54223 | 0.02679 | 5.56809 |
| C    | 4  | -0.64484           | 1.99907 | 4.63703 | 0.00874 | 6.64484 |
| H    | 5  | 0.22891            | 0.00000 | 0.76986 | 0.00123 | 0.77109 |
| H    | 6  | 0.22592            | 0.00000 | 0.77304 | 0.00104 | 0.77408 |
| H    | 7  | 0.22574            | 0.00000 | 0.77323 | 0.00103 | 0.77426 |
| C    | 8  | 0.12429            | 1.99881 | 3.85161 | 0.02530 | 5.87571 |
| C    | 9  | -0.01989           | 1.99899 | 3.99728 | 0.02363 | 6.01989 |
| C    | 10 | -0.16676           | 1.99909 | 4.15365 | 0.01401 | 6.16676 |
| C    | 11 | -0.14635           | 1.99922 | 4.13400 | 0.01313 | 6.14635 |
| C    | 12 | -0.07429           | 1.99860 | 4.06313 | 0.01256 | 6.07429 |
| C    | 13 | -0.19868           | 1.99908 | 4.18389 | 0.01571 | 6.19868 |
| C    | 14 | -0.13756           | 1.99897 | 4.12227 | 0.01632 | 6.13756 |
| C    | 15 | -0.57883           | 1.99918 | 4.57151 | 0.00814 | 6.57883 |
| H    | 16 | 0.20040            | 0.00000 | 0.79807 | 0.00154 | 0.79960 |
| H    | 17 | 0.20056            | 0.00000 | 0.79812 | 0.00132 | 0.79944 |
| H    | 18 | 0.19280            | 0.00000 | 0.80593 | 0.00127 | 0.80720 |
| C    | 19 | -0.57953           | 1.99919 | 4.57209 | 0.00826 | 6.57953 |
| H    | 20 | 0.19664            | 0.00000 | 0.80214 | 0.00122 | 0.80336 |
| H    | 21 | 0.20069            | 0.00000 | 0.79798 | 0.00133 | 0.79931 |
| H    | 22 | 0.19423            | 0.00000 | 0.80417 | 0.00160 | 0.80577 |
| C    | 23 | 0.43696            | 1.99907 | 3.53673 | 0.02723 | 5.56304 |
| C    | 24 | -0.64623           | 1.99907 | 4.63819 | 0.00898 | 6.64623 |
| H    | 25 | 0.22907            | 0.00000 | 0.76964 | 0.00129 | 0.77093 |
| H    | 26 | 0.22819            | 0.00000 | 0.77072 | 0.00109 | 0.77181 |
| H    | 27 | 0.22556            | 0.00000 | 0.77325 | 0.00119 | 0.77444 |
| C    | 28 | 0.12165            | 1.99882 | 3.85421 | 0.02532 | 5.87835 |

|    |    |          |          |         |         |          |
|----|----|----------|----------|---------|---------|----------|
| C  | 29 | 0.00730  | 1.99900  | 3.96963 | 0.02408 | 5.99270  |
| C  | 30 | -0.14541 | 1.99889  | 4.13267 | 0.01384 | 6.14541  |
| C  | 31 | -0.15889 | 1.99922  | 4.14642 | 0.01325 | 6.15889  |
| C  | 32 | -0.09894 | 1.99905  | 4.08639 | 0.01350 | 6.09894  |
| C  | 33 | -0.21596 | 1.99906  | 4.20102 | 0.01588 | 6.21596  |
| C  | 34 | -0.16073 | 1.99911  | 4.14555 | 0.01607 | 6.16073  |
| C  | 35 | -0.57676 | 1.99917  | 4.56917 | 0.00843 | 6.57676  |
| H  | 36 | 0.19225  | 0.00000  | 0.80633 | 0.00142 | 0.80775  |
| H  | 37 | 0.20307  | 0.00000  | 0.79566 | 0.00128 | 0.79693  |
| H  | 38 | 0.20095  | 0.00000  | 0.79783 | 0.00122 | 0.79905  |
| C  | 39 | -0.57488 | 1.99918  | 4.56705 | 0.00865 | 6.57488  |
| H  | 40 | 0.18672  | 0.00000  | 0.81209 | 0.00119 | 0.81328  |
| H  | 41 | 0.20190  | 0.00000  | 0.79679 | 0.00131 | 0.79810  |
| H  | 42 | 0.20049  | 0.00000  | 0.79808 | 0.00143 | 0.79951  |
| C  | 43 | 0.43993  | 1.99905  | 3.53389 | 0.02713 | 5.56007  |
| C  | 44 | -0.64582 | 1.99907  | 4.63814 | 0.00860 | 6.64582  |
| H  | 45 | 0.22878  | 0.00000  | 0.76997 | 0.00125 | 0.77122  |
| H  | 46 | 0.22539  | 0.00000  | 0.77360 | 0.00101 | 0.77461  |
| H  | 47 | 0.22854  | 0.00000  | 0.77039 | 0.00108 | 0.77146  |
| C  | 48 | 0.12604  | 1.99882  | 3.85019 | 0.02495 | 5.87396  |
| C  | 49 | -0.02245 | 1.99897  | 4.00041 | 0.02307 | 6.02245  |
| C  | 50 | -0.16245 | 1.99907  | 4.14942 | 0.01395 | 6.16245  |
| C  | 51 | -0.13953 | 1.99915  | 4.12719 | 0.01320 | 6.13953  |
| C  | 52 | -0.15456 | 1.99921  | 4.14176 | 0.01359 | 6.15456  |
| C  | 53 | -0.21348 | 1.99906  | 4.19867 | 0.01575 | 6.21348  |
| C  | 54 | -0.15637 | 1.99915  | 4.14119 | 0.01602 | 6.15637  |
| C  | 55 | -0.57545 | 1.99916  | 4.56782 | 0.00847 | 6.57545  |
| H  | 56 | 0.20335  | 0.00000  | 0.79505 | 0.00160 | 0.79665  |
| H  | 57 | 0.20202  | 0.00000  | 0.79665 | 0.00133 | 0.79798  |
| H  | 58 | 0.18224  | 0.00000  | 0.81619 | 0.00157 | 0.81776  |
| C  | 59 | -0.58943 | 1.99917  | 4.58161 | 0.00864 | 6.58943  |
| H  | 60 | 0.20243  | 0.00000  | 0.79638 | 0.00119 | 0.79757  |
| H  | 61 | 0.20535  | 0.00000  | 0.79349 | 0.00116 | 0.79465  |
| H  | 62 | 0.19773  | 0.00000  | 0.80066 | 0.00161 | 0.80227  |
| H  | 63 | 0.18673  | 0.00000  | 0.81171 | 0.00156 | 0.81327  |
| H  | 64 | 0.18115  | 0.00000  | 0.81722 | 0.00163 | 0.81885  |
| H  | 65 | 0.09531  | 0.00000  | 0.90275 | 0.00193 | 0.90469  |
| H  | 66 | 0.17337  | 0.00000  | 0.82490 | 0.00173 | 0.82663  |
| H  | 67 | 0.16312  | 0.00000  | 0.83380 | 0.00308 | 0.83688  |
| H  | 68 | 0.15038  | 0.00000  | 0.84735 | 0.00227 | 0.84962  |
| H  | 69 | 0.19058  | 0.00000  | 0.80755 | 0.00187 | 0.80942  |
| H  | 70 | 0.13933  | 0.00000  | 0.85901 | 0.00166 | 0.86067  |
| H  | 71 | 0.16753  | 0.00000  | 0.83087 | 0.00160 | 0.83247  |
| H  | 72 | 0.18389  | 0.00000  | 0.81340 | 0.00271 | 0.81611  |
| H  | 73 | 0.18553  | 0.00000  | 0.81282 | 0.00165 | 0.81447  |
| H  | 74 | 0.17101  | 0.00000  | 0.82711 | 0.00188 | 0.82899  |
| H  | 75 | 0.18834  | 0.00000  | 0.81024 | 0.00142 | 0.81166  |
| H  | 76 | 0.17651  | 0.00000  | 0.82192 | 0.00157 | 0.82349  |
| H  | 77 | 0.18360  | 0.00000  | 0.81379 | 0.00261 | 0.81640  |
| N  | 78 | -0.59663 | 1.99936  | 5.57207 | 0.02520 | 7.59663  |
| N  | 79 | -0.61974 | 1.99938  | 5.59615 | 0.02421 | 7.61974  |
| N  | 80 | -0.62132 | 1.99935  | 5.59627 | 0.02571 | 7.62132  |
| Tl | 81 | 0.90046  | 77.98823 | 2.10511 | 0.00620 | 80.09954 |

=====  
\* Total \* 1.00000 151.95394 195.34617 0.69989 348.00000

Natural Population

-----  
Effective Core 68.00000  
Core 83.95394 ( 99.9452% of 84)  
Valence 195.34617 ( 99.6664% of 196)  
Natural Minimal Basis 347.30011 ( 99.7989% of 348)

Natural Rydberg Basis 0.69989 ( 0.2011% of 348)

---

Atom No      Natural Electron Configuration

---

C 1    [core]2S( 0.96)2p( 3.35)3p( 0.03)  
H 2    1S( 0.77)  
C 3    [core]2S( 0.85)2p( 2.69)3p( 0.02)  
C 4    [core]2S( 1.02)2p( 3.61)3p( 0.01)  
H 5    1S( 0.77)  
H 6    1S( 0.77)  
H 7    1S( 0.77)  
C 8    [core]2S( 0.85)2p( 3.01)3p( 0.02)  
C 9    [core]2S( 0.89)2p( 3.10)3p( 0.02)  
C 10   [core]2S( 0.94)2p( 3.21)3p( 0.01)  
C 11   [core]2S( 0.94)2p( 3.19)3p( 0.01)  
C 12   [core]2S( 0.88)2p( 3.19)3p( 0.01)  
C 13   [core]2S( 0.93)2p( 3.25)3p( 0.01)  
C 14   [core]2S( 0.92)2p( 3.20)3p( 0.02)  
C 15   [core]2S( 1.01)2p( 3.56)3p( 0.01)  
H 16   1S( 0.80)  
H 17   1S( 0.80)  
H 18   1S( 0.81)  
C 19   [core]2S( 1.01)2p( 3.56)3p( 0.01)  
H 20   1S( 0.80)  
H 21   1S( 0.80)  
H 22   1S( 0.80)  
C 23   [core]2S( 0.86)2p( 2.68)3p( 0.02)  
C 24   [core]2S( 1.02)2p( 3.62)3p( 0.01)  
H 25   1S( 0.77)  
H 26   1S( 0.77)  
H 27   1S( 0.77)  
C 28   [core]2S( 0.85)2p( 3.01)3p( 0.02)  
C 29   [core]2S( 0.89)2p( 3.08)3p( 0.02)  
C 30   [core]2S( 0.90)2p( 3.24)3p( 0.01)  
C 31   [core]2S( 0.93)2p( 3.21)3p( 0.01)  
C 32   [core]2S( 0.91)2p( 3.17)3p( 0.01)  
C 33   [core]2S( 0.92)2p( 3.28)3p( 0.01)  
C 34   [core]2S( 0.95)2p( 3.20)3p( 0.02)  
C 35   [core]2S( 1.01)2p( 3.56)3p( 0.01)  
H 36   1S( 0.81)  
H 37   1S( 0.80)  
H 38   1S( 0.80)  
C 39   [core]2S( 1.01)2p( 3.55)3p( 0.01)  
H 40   1S( 0.81)  
H 41   1S( 0.80)  
H 42   1S( 0.80)  
C 43   [core]2S( 0.85)2p( 2.68)3p( 0.02)  
C 44   [core]2S( 1.02)2p( 3.62)3p( 0.01)  
H 45   1S( 0.77)  
H 46   1S( 0.77)  
H 47   1S( 0.77)  
C 48   [core]2S( 0.84)2p( 3.01)3p( 0.02)  
C 49   [core]2S( 0.89)2p( 3.11)3p( 0.02)  
C 50   [core]2S( 0.93)2p( 3.22)3p( 0.01)  
C 51   [core]2S( 0.93)2p( 3.20)3p( 0.01)  
C 52   [core]2S( 0.94)2p( 3.20)3p( 0.01)  
C 53   [core]2S( 0.92)2p( 3.27)3p( 0.01)  
C 54   [core]2S( 0.95)2p( 3.19)3p( 0.02)  
C 55   [core]2S( 1.01)2p( 3.56)3p( 0.01)  
H 56   1S( 0.80)  
H 57   1S( 0.80)

H 58 1S( 0.82)  
C 59 [core]2S( 1.01)2p( 3.57)3p( 0.01)  
H 60 1S( 0.80)  
H 61 1S( 0.79)  
H 62 1S( 0.80)  
H 63 1S( 0.81)  
H 64 1S( 0.82)  
H 65 1S( 0.90)  
H 66 1S( 0.82)  
H 67 1S( 0.83)  
H 68 1S( 0.85)  
H 69 1S( 0.81)  
H 70 1S( 0.86)  
H 71 1S( 0.83)  
H 72 1S( 0.81)  
H 73 1S( 0.81)  
H 74 1S( 0.83)  
H 75 1S( 0.81)  
H 76 1S( 0.82)  
H 77 1S( 0.81)  
N 78 [core]2S( 1.36)2p( 4.21)3p( 0.02)  
N 79 [core]2S( 1.36)2p( 4.23)3p( 0.02)  
N 80 [core]2S( 1.35)2p( 4.24)3p( 0.02)  
Tl 81 [core]6S( 1.95)6p( 0.15)7p( 0.01)

NBO analysis skipped by request.

1|1|UNPC-E-C07CYG43054|SP|RB3LYP|LANL2DZ|C34H43N3Tl1(1+)|MCDSTFM|03-Ap  
r-2013|0|# rb3lyp/lanl2dz pop=npa geom=connectivity||single-Point XRD  
Monomer|1,1|C,0,0.01861,-0.083509,2.255965|H,0,0.004563,-0.122705,3.  
235795|C,0,1.475694,0.037251,1.819378|C,0,2.383293,0.678773,2.817058|H  
,0,3.26891,0.740388,2.450589|H,0,2.404998,0.148404,3.617819|H,0,2.0606  
74,1.558898,3.024916|C,0,3.100261,-0.209698,0.131984|C,0,3.901979,-1.3  
27516,-0.084833|C,0,5.12032,-1.118172,-0.730319|C,0,5.509287,0.147439,  
-1.163167|C,0,4.696747,1.225405,-0.94872|C,0,3.488421,1.047147,-0.2973  
04|C,0,3.511043,-2.694884,0.415175|C,0,4.301631,-3.060222,1.646233|H,0  
,5.230767,-3.137415,1.418018|H,0,3.985941,-3.89728,1.993251|H,0,4.1915  
28,-2.375482,2.311377|C,0,3.635796,-3.770424,-0.624249|H,0,3.09152,-3.  
546877,-1.383296|H,0,3.345446,-4.607581,-0.256005|H,0,4.554096,-3.8437  
78,-0.899697|C,0,-0.819518,1.110863,1.830107|C,0,-1.963955,1.431667,2.  
722624|H,0,-2.44803,2.180175,2.366134|H,0,-1.635595,1.649364,3.597907|  
H,0,-2.549087,0.671305,2.778766|C,0,-1.338571,2.731076,0.193238|C,0,-0  
.817831,4.019156,0.044002|C,0,-1.657345,4.927439,-0.608713|C,0,-2.8593  
8,4.613055,-1.091473|C,0,-3.35078,3.324906,-0.961731|C,0,-2.575807,2.3  
84734,-0.308671|C,0,0.575307,4.362779,0.480037|C,0,0.677188,5.710898,1  
.197953|H,0,0.293384,6.396553,0.647347|H,0,1.598956,5.913988,1.36741|H  
,0,0.200933,5.664574,2.030595|C,0,1.507967,4.364168,-0.73349|H,0,1.482  
544,3.502822,-1.157927|H,0,2.406176,4.551802,-0.446567|H,0,1.224468,5.  
037208,-1.355743|C,0,-0.583107,-1.380062,1.735256|C,0,-0.367113,-2.582  
691,2.595582|H,0,-0.836795,-3.332532,2.221255|H,0,-0.695737,-2.407635,  
3.479846|H,0,0.571789,-2.782032,2.637478|C,0,-1.705379,-2.517673,-0.01  
3464|C,0,-3.088728,-2.656069,-0.149691|C,0,-3.539864,-3.736897,-0.8935  
65|C,0,-2.671563,-4.628305,-1.481231|C,0,-1.319113,-4.486814,-1.319917  
|C,0,-0.828045,-3.42712,-0.58738|C,0,-4.016761,-1.680893,0.534937|C,0,  
-4.239789,-2.088872,1.984061|H,0,-4.68936,-2.936869,2.012404|H,0,-4.77  
882,-1.426662,2.424024|H,0,-3.393081,-2.161062,2.430149|C,0,-5.3658,-1  
.509395,-0.173705|H,0,-5.216056,-1.346681,-1.108593|H,0,-5.836015,-0.7  
64442,0.208441|H,0,-5.887201,-2.307161,-0.066446|H,0,5.705659,-1.85290  
7,-0.918624|H,0,6.320426,0.169319,-1.62659|H,0,4.861412,1.941492,-1.17  
3468|H,0,2.878627,1.747231,-0.224064|H,0,2.618643,-2.733005,0.597007|H  
,0,-1.222838,5.658391,-0.709589|H,0,-3.468463,5.144209,-1.580622|H,0,-  
4.101781,3.065483,-1.260104|H,0,-2.875714,1.530752,-0.193932|H,0,0.900

886,3.712996,1.118076|H,0,-4.457959,-3.880782,-1.073882|H,0,-3.11043,-  
5.249296,-1.966502|H,0,-0.733023,-5.136672,-1.687849|H,0,0.084013,-3.3  
77206,-0.477995|H,0,-3.558752,-0.802221,0.58052|N,0,1.779334,-0.372228  
,0.664361|N,0,-0.508284,1.706202,0.748331|N,0,-1.185303,-1.346835,0.62  
6165|Ti,0,-0.088425,0.101083,-1.291919||Version=IA32W-G09RevB.01|State  
=1-A|HF=-1536.0607674|RMSD=5.589e-009|Dipole=-0.1935887,-0.162696,1.60  
29179|Quadrupole=5.7587195,4.5309503,-10.2896698,0.8898621,0.5116285,-  
0.3266483|PG=C01 [X(C34H43N3T11)]||@

TRUST EVERYONE, BUT CUT THE CARDS.

Job cpu time: 0 days 1 hours 15 minutes 27.0 seconds.

File lengths (MBytes): RWF= 106 Int= 0 D2E= 0 Chk= 8 Scr= 1

Normal termination of Gaussian 09 at Wed Apr 03 11:13:36 2013.

### Appendix 3. Gaussian output for dication dimer, LANL2-DZ, HF-SCF.

\*\*\*\*\*

Gaussian 09: IA32W-G09RevB.01 12-Aug-2010

28-Mar-2013

\*\*\*\*\*

%chk=\\vdm09-g1.ds.man.ac.uk\HOME\Desktop\cation\_only\_edited.chk

# hf/lanl2dz guess=local pop=npa geom=connectivity

1/38=1,57=2/1;

2/12=2,17=6,18=5,40=1/2;

3/5=6,6=3,11=9,16=1,25=1,30=1/1,2,3;

4/9=10/1;

5/5=2,38=5/2;

6/7=2,8=2,9=2,10=2,28=1,40=-1/1,7;

99/5=1,9=1/99;

-----  
CSD ENTRY ofm27p-1

-----  
Symbolic Z-matrix:

Charge = 2 Multiplicity = 1

|                                      |        |        |        |
|--------------------------------------|--------|--------|--------|
| C(PDBName=C1,ResName=UNK,ResNum=1)   | -0.621 | 11.017 | 13.349 |
| H(PDBName=H1,ResName=UNK,ResNum=1)   | -1.177 | 10.346 | 12.9   |
| C(PDBName=C2,ResName=UNK,ResNum=1)   | -0.739 | 10.785 | 14.852 |
| C(PDBName=C3,ResName=UNK,ResNum=1)   | -2.015 | 10.148 | 15.295 |
| H(PDBName=H3A,ResName=UNK,ResNum=1)  | -2.016 | 10.067 | 16.252 |
| H(PDBName=H3B,ResName=UNK,ResNum=1)  | -2.09  | 9.275  | 14.9   |
| H(PDBName=H3C,ResName=UNK,ResNum=1)  | -2.757 | 10.69  | 15.018 |
| C(PDBName=C4,ResName=UNK,ResNum=1)   | 0.148  | 11.089 | 17.013 |
| C(PDBName=C5,ResName=UNK,ResNum=1)   | 0.985  | 10.208 | 17.693 |
| C(PDBName=C6,ResName=UNK,ResNum=1)   | 0.971  | 10.268 | 19.087 |
| C(PDBName=C7,ResName=UNK,ResNum=1)   | 0.176  | 11.185 | 19.77  |
| C(PDBName=C8,ResName=UNK,ResNum=1)   | -0.627 | 12.047 | 19.077 |
| C(PDBName=C9,ResName=UNK,ResNum=1)   | -0.643 | 11.998 | 17.693 |
| C(PDBName=C10,ResName=UNK,ResNum=1)  | 1.819  | 9.184  | 16.967 |
| C(PDBName=C11,ResName=UNK,ResNum=1)  | 1.205  | 7.812  | 17.086 |
| H(PDBName=H11A,ResName=UNK,ResNum=1) | 1.219  | 7.534  | 18.005 |
| H(PDBName=H11B,ResName=UNK,ResNum=1) | 1.706  | 7.189  | 16.556 |



|                                      |        |        |        |
|--------------------------------------|--------|--------|--------|
| H(PDBName=H11C,ResName=UNK,ResNum=1) | 0.296  | 7.84   | 16.775 |
| C(PDBName=C12,ResName=UNK,ResNum=1)  | 3.252  | 9.155  | 17.411 |
| H(PDBName=H12A,ResName=UNK,ResNum=1) | 3.644  | 10.023 | 17.287 |
| H(PDBName=H12B,ResName=UNK,ResNum=1) | 3.736  | 8.508  | 16.894 |
| H(PDBName=H12C,ResName=UNK,ResNum=1) | 3.294  | 8.916  | 18.342 |
| C(PDBName=C13,ResName=UNK,ResNum=1)  | -1.123 | 12.389 | 12.928 |
| C(PDBName=C14,ResName=UNK,ResNum=1)  | -1.683 | 12.464 | 11.553 |
| H(PDBName=H14A,ResName=UNK,ResNum=1) | -1.952 | 13.366 | 11.366 |
| H(PDBName=H14B,ResName=UNK,ResNum=1) | -2.443 | 11.882 | 11.485 |
| H(PDBName=H14C,ResName=UNK,ResNum=1) | -1.013 | 12.193 | 10.92  |
| C(PDBName=C15,ResName=UNK,ResNum=1)  | -1.289 | 14.701 | 13.374 |
| C(PDBName=C16,ResName=UNK,ResNum=1)  | -2.299 | 15.389 | 14.053 |
| C(PDBName=C17,ResName=UNK,ResNum=1)  | -2.443 | 16.734 | 13.698 |
| C(PDBName=C18,ResName=UNK,ResNum=1)  | -1.672 | 17.353 | 12.804 |
| C(PDBName=C19,ResName=UNK,ResNum=1)  | -0.656 | 16.666 | 12.16  |
| C(PDBName=C20,ResName=UNK,ResNum=1)  | -0.475 | 15.328 | 12.454 |
| C(PDBName=C21,ResName=UNK,ResNum=1)  | -3.102 | 14.741 | 15.141 |
| C(PDBName=C22,ResName=UNK,ResNum=1)  | -4.597 | 15.06  | 15.071 |
| H(PDBName=H22A,ResName=UNK,ResNum=1) | -4.721 | 16.012 | 15.051 |
| H(PDBName=H22B,ResName=UNK,ResNum=1) | -5.038 | 14.696 | 15.841 |
| H(PDBName=H22C,ResName=UNK,ResNum=1) | -4.969 | 14.672 | 14.275 |
| C(PDBName=C23,ResName=UNK,ResNum=1)  | -2.556 | 15.167 | 16.506 |
| H(PDBName=H23A,ResName=UNK,ResNum=1) | -1.629 | 14.924 | 16.571 |
| H(PDBName=H23B,ResName=UNK,ResNum=1) | -3.051 | 14.724 | 17.201 |
| H(PDBName=H23C,ResName=UNK,ResNum=1) | -2.647 | 16.117 | 16.605 |
| C(PDBName=C24,ResName=UNK,ResNum=1)  | 0.815  | 10.804 | 12.893 |
| C(PDBName=C25,ResName=UNK,ResNum=1)  | 1.185  | 9.393  | 12.567 |
| H(PDBName=H25A,ResName=UNK,ResNum=1) | 2.083  | 9.368  | 12.227 |
| H(PDBName=H25B,ResName=UNK,ResNum=1) | 0.582  | 9.048  | 11.905 |
| H(PDBName=H25C,ResName=UNK,ResNum=1) | 1.129  | 8.856  | 13.361 |
| C(PDBName=C26,ResName=UNK,ResNum=1)  | 2.969  | 11.72  | 12.532 |
| C(PDBName=C27,ResName=UNK,ResNum=1)  | 3.431  | 12.293 | 11.344 |
| C(PDBName=C28,ResName=UNK,ResNum=1)  | 4.804  | 12.3   | 11.145 |
| C(PDBName=C29,ResName=UNK,ResNum=1)  | 5.677  | 11.78  | 12.074 |
| C(PDBName=C30,ResName=UNK,ResNum=1)  | 5.203  | 11.206 | 13.224 |
| C(PDBName=C31,ResName=UNK,ResNum=1)  | 3.845  | 11.176 | 13.461 |
| C(PDBName=C32,ResName=UNK,ResNum=1)  | 2.448  | 12.825 | 10.329 |
| C(PDBName=C33,ResName=UNK,ResNum=1)  | 1.935  | 11.697 | 9.445  |
| H(PDBName=H33A,ResName=UNK,ResNum=1) | 2.663  | 11.335 | 8.935  |
| H(PDBName=H33B,ResName=UNK,ResNum=1) | 1.264  | 12.038 | 8.848  |
| H(PDBName=H33C,ResName=UNK,ResNum=1) | 1.555  | 11.008 | 9.994  |
| C(PDBName=C34,ResName=UNK,ResNum=1)  | 3.008  | 13.957 | 9.46   |
| H(PDBName=H34A,ResName=UNK,ResNum=1) | 3.415  | 14.62  | 10.024 |
| H(PDBName=H34B,ResName=UNK,ResNum=1) | 2.294  | 14.36  | 8.959  |
| H(PDBName=H34C,ResName=UNK,ResNum=1) | 3.663  | 13.603 | 8.857  |
| H(PDBName=H6,ResName=UNK,ResNum=1)   | 1.538  | 9.696  | 19.606 |
| H(PDBName=H7,ResName=UNK,ResNum=1)   | 0.278  | 11.174 | 20.699 |
| H(PDBName=H8,ResName=UNK,ResNum=1)   | -1.078 | 12.575 | 19.405 |
| H(PDBName=H9,ResName=UNK,ResNum=1)   | -1.108 | 12.636 | 17.199 |
| H(PDBName=H10,ResName=UNK,ResNum=1)  | 1.915  | 9.405  | 16.088 |
| H(PDBName=H17,ResName=UNK,ResNum=1)  | -3.034 | 17.078 | 14.214 |
| H(PDBName=H18,ResName=UNK,ResNum=1)  | -1.668 | 18.26  | 12.539 |
| H(PDBName=H19,ResName=UNK,ResNum=1)  | -0.128 | 17.012 | 11.593 |
| H(PDBName=H20,ResName=UNK,ResNum=1)  | 0.176  | 14.842 | 12.038 |
| H(PDBName=H21,ResName=UNK,ResNum=1)  | -3.047 | 13.778 | 15.075 |
| H(PDBName=H28,ResName=UNK,ResNum=1)  | 5.205  | 12.708 | 10.391 |
| H(PDBName=H29,ResName=UNK,ResNum=1)  | 6.536  | 11.897 | 11.825 |
| H(PDBName=H30,ResName=UNK,ResNum=1)  | 5.812  | 10.806 | 13.832 |
| H(PDBName=H31,ResName=UNK,ResNum=1)  | 3.561  | 10.76  | 14.23  |
| H(PDBName=H32,ResName=UNK,ResNum=1)  | 1.65   | 13.154 | 10.819 |
| N(PDBName=N1,ResName=UNK,ResNum=1)   | 0.214  | 11.175 | 15.584 |
| N(PDBName=N2,ResName=UNK,ResNum=1)   | -0.994 | 13.352 | 13.751 |

|                                      |        |        |        |
|--------------------------------------|--------|--------|--------|
| N(PDBName=N3,ResName=UNK,ResNum=1)   | 1.576  | 11.81  | 12.849 |
| TI(PDBName=T11,ResName=UNK,ResNum=1) | 1.393  | 13.539 | 14.838 |
| TI(PDBName=T11,ResName=UNK,ResNum=1) | 2.419  | 13.341 | 18.333 |
| C(PDBName=C4,ResName=UNK,ResNum=1)   | 3.665  | 15.791 | 16.158 |
| C(PDBName=C5,ResName=UNK,ResNum=1)   | 2.828  | 16.672 | 15.478 |
| C(PDBName=C6,ResName=UNK,ResNum=1)   | 2.842  | 16.612 | 14.084 |
| C(PDBName=C7,ResName=UNK,ResNum=1)   | 3.637  | 15.695 | 13.401 |
| C(PDBName=C8,ResName=UNK,ResNum=1)   | 4.44   | 14.833 | 14.094 |
| C(PDBName=C9,ResName=UNK,ResNum=1)   | 4.456  | 14.882 | 15.478 |
| C(PDBName=C1,ResName=UNK,ResNum=1)   | 4.433  | 15.863 | 19.822 |
| H(PDBName=H1,ResName=UNK,ResNum=1)   | 4.99   | 16.534 | 20.271 |
| C(PDBName=C2,ResName=UNK,ResNum=1)   | 4.551  | 16.095 | 18.319 |
| C(PDBName=C3,ResName=UNK,ResNum=1)   | 5.827  | 16.732 | 17.876 |
| H(PDBName=H3A,ResName=UNK,ResNum=1)  | 5.829  | 16.813 | 16.919 |
| H(PDBName=H3B,ResName=UNK,ResNum=1)  | 5.903  | 17.605 | 18.271 |
| H(PDBName=H3C,ResName=UNK,ResNum=1)  | 6.57   | 16.19  | 18.153 |
| C(PDBName=C10,ResName=UNK,ResNum=1)  | 1.994  | 17.696 | 16.204 |
| C(PDBName=C11,ResName=UNK,ResNum=1)  | 2.608  | 19.068 | 16.085 |
| H(PDBName=H11A,ResName=UNK,ResNum=1) | 2.594  | 19.346 | 15.166 |
| H(PDBName=H11B,ResName=UNK,ResNum=1) | 2.107  | 19.691 | 16.615 |
| H(PDBName=H11C,ResName=UNK,ResNum=1) | 3.516  | 19.04  | 16.396 |
| C(PDBName=C12,ResName=UNK,ResNum=1)  | 0.56   | 17.725 | 15.759 |
| H(PDBName=H12A,ResName=UNK,ResNum=1) | 0.169  | 16.857 | 15.884 |
| H(PDBName=H12B,ResName=UNK,ResNum=1) | 0.077  | 18.373 | 16.277 |
| H(PDBName=H12C,ResName=UNK,ResNum=1) | 0.519  | 17.964 | 14.829 |
| C(PDBName=C13,ResName=UNK,ResNum=1)  | 4.936  | 14.491 | 20.243 |
| C(PDBName=C14,ResName=UNK,ResNum=1)  | 5.496  | 14.416 | 21.617 |
| H(PDBName=H14A,ResName=UNK,ResNum=1) | 5.765  | 13.514 | 21.805 |
| H(PDBName=H14B,ResName=UNK,ResNum=1) | 6.256  | 14.998 | 21.685 |
| H(PDBName=H14C,ResName=UNK,ResNum=1) | 4.825  | 14.687 | 22.251 |
| C(PDBName=C15,ResName=UNK,ResNum=1)  | 5.102  | 12.179 | 19.796 |
| C(PDBName=C16,ResName=UNK,ResNum=1)  | 6.111  | 11.491 | 19.118 |
| C(PDBName=C17,ResName=UNK,ResNum=1)  | 6.256  | 10.146 | 19.473 |
| C(PDBName=C18,ResName=UNK,ResNum=1)  | 5.485  | 9.527  | 20.367 |
| C(PDBName=C19,ResName=UNK,ResNum=1)  | 4.469  | 10.214 | 21.01  |
| C(PDBName=C20,ResName=UNK,ResNum=1)  | 4.288  | 11.552 | 20.717 |
| C(PDBName=C21,ResName=UNK,ResNum=1)  | 6.915  | 12.139 | 18.03  |
| C(PDBName=C22,ResName=UNK,ResNum=1)  | 8.41   | 11.82  | 18.1   |
| H(PDBName=H22A,ResName=UNK,ResNum=1) | 8.533  | 10.868 | 18.12  |
| H(PDBName=H22B,ResName=UNK,ResNum=1) | 8.851  | 12.184 | 17.33  |
| H(PDBName=H22C,ResName=UNK,ResNum=1) | 8.781  | 12.208 | 18.896 |
| C(PDBName=C23,ResName=UNK,ResNum=1)  | 6.369  | 11.713 | 16.665 |
| H(PDBName=H23A,ResName=UNK,ResNum=1) | 5.442  | 11.956 | 16.6   |
| H(PDBName=H23B,ResName=UNK,ResNum=1) | 6.864  | 12.156 | 15.97  |
| H(PDBName=H23C,ResName=UNK,ResNum=1) | 6.46   | 10.763 | 16.566 |
| C(PDBName=C24,ResName=UNK,ResNum=1)  | 2.998  | 16.076 | 20.278 |
| C(PDBName=C25,ResName=UNK,ResNum=1)  | 2.628  | 17.487 | 20.604 |
| H(PDBName=H25A,ResName=UNK,ResNum=1) | 1.73   | 17.512 | 20.944 |
| H(PDBName=H25B,ResName=UNK,ResNum=1) | 3.231  | 17.832 | 21.266 |
| H(PDBName=H25C,ResName=UNK,ResNum=1) | 2.684  | 18.025 | 19.81  |
| C(PDBName=C26,ResName=UNK,ResNum=1)  | 0.844  | 15.16  | 20.639 |
| C(PDBName=C27,ResName=UNK,ResNum=1)  | 0.382  | 14.587 | 21.826 |
| C(PDBName=C28,ResName=UNK,ResNum=1)  | -0.992 | 14.58  | 22.025 |
| C(PDBName=C29,ResName=UNK,ResNum=1)  | -1.864 | 15.1   | 21.097 |
| C(PDBName=C30,ResName=UNK,ResNum=1)  | -1.39  | 15.674 | 19.947 |
| C(PDBName=C31,ResName=UNK,ResNum=1)  | -0.032 | 15.704 | 19.71  |
| C(PDBName=C32,ResName=UNK,ResNum=1)  | 1.365  | 14.055 | 22.841 |
| C(PDBName=C33,ResName=UNK,ResNum=1)  | 1.878  | 15.183 | 23.725 |
| H(PDBName=H33A,ResName=UNK,ResNum=1) | 1.15   | 15.545 | 24.236 |
| H(PDBName=H33B,ResName=UNK,ResNum=1) | 2.549  | 14.842 | 24.323 |
| H(PDBName=H33C,ResName=UNK,ResNum=1) | 2.257  | 15.872 | 23.176 |
| C(PDBName=C34,ResName=UNK,ResNum=1)  | 0.805  | 12.923 | 23.711 |

H(PDBName=H34A,ResName=UNK,ResNum=1) 0.398 12.26 23.147  
H(PDBName=H34B,ResName=UNK,ResNum=1) 1.519 12.52 24.211  
H(PDBName=H34C,ResName=UNK,ResNum=1) 0.15 13.277 24.314  
H(PDBName=H6,ResName=UNK,ResNum=1) 2.275 17.184 13.565  
H(PDBName=H7,ResName=UNK,ResNum=1) 3.535 15.706 12.472  
H(PDBName=H8,ResName=UNK,ResNum=1) 4.891 14.305 13.766  
H(PDBName=H9,ResName=UNK,ResNum=1) 4.921 14.244 15.972  
H(PDBName=H10,ResName=UNK,ResNum=1) 1.898 17.475 17.083  
H(PDBName=H17,ResName=UNK,ResNum=1) 6.846 9.802 18.957  
H(PDBName=H18,ResName=UNK,ResNum=1) 5.481 8.62 20.632  
H(PDBName=H19,ResName=UNK,ResNum=1) 3.941 9.868 21.578  
H(PDBName=H20,ResName=UNK,ResNum=1) 3.637 12.038 21.133  
H(PDBName=H21,ResName=UNK,ResNum=1) 6.86 13.102 18.096  
H(PDBName=H28,ResName=UNK,ResNum=1) -1.392 14.172 22.78  
H(PDBName=H29,ResName=UNK,ResNum=1) -2.723 14.983 21.345  
H(PDBName=H30,ResName=UNK,ResNum=1) -1.999 16.074 19.339  
H(PDBName=H31,ResName=UNK,ResNum=1) 0.252 16.12 18.941  
H(PDBName=H32,ResName=UNK,ResNum=1) 2.163 13.726 22.352  
N(PDBName=N1,ResName=UNK,ResNum=1) 3.599 15.705 17.587  
N(PDBName=N2,ResName=UNK,ResNum=1) 4.807 13.528 19.42  
N(PDBName=N3,ResName=UNK,ResNum=1) 2.237 15.07 20.322

Residue 1 PDB Number 1\_0 UNK charge 0.00000000 ave dist 0.000  
Stoichiometry C68H86N6Ti2(2+)  
Framework group C1[X(C68H86N6Ti2)]  
Deg. of freedom 480  
Full point group C1 NOp 1  
Largest Abelian subgroup C1 NOp 1  
Largest concise Abelian subgroup C1 NOp 1  
Standard orientation:

-----  
Center Atomic Atomic Coordinates (Angstroms)  
Number Number Type X Y Z  
-----  
1 6 0 -3.903023 0.051295 -2.737981  
2 1 0 -4.514533 0.085596 -3.503394  
3 6 0 -2.503247 -0.227432 -3.276213  
4 6 0 -2.460164 -0.972930 -4.569492  
5 1 0 -1.545611 -1.129417 -4.817515  
6 1 0 -2.892297 -0.452722 -5.252444  
7 1 0 -2.914133 -1.812707 -4.470777  
8 6 0 -0.170439 -0.150782 -2.958032  
9 6 0 0.684185 0.872376 -3.360395  
10 6 0 2.019408 0.533222 -3.582174  
11 6 0 2.485112 -0.764383 -3.385337  
12 6 0 1.626865 -1.746963 -2.977845  
13 6 0 0.293215 -1.440024 -2.765050  
14 6 0 0.184239 2.270912 -3.616048  
15 6 0 0.075302 2.538076 -5.096013  
16 1 0 0.950346 2.513578 -5.490651  
17 1 0 -0.315350 3.402468 -5.238301  
18 1 0 -0.477148 1.865062 -5.502998  
19 6 0 1.011329 3.333035 -2.953263  
20 1 0 1.034524 3.177106 -2.005839  
21 1 0 0.627484 4.194823 -3.126870  
22 1 0 1.907183 3.306084 -3.303069  
23 6 0 -4.397058 -1.039420 -1.801017  
24 6 0 -5.870231 -1.237389 -1.780559  
25 1 0 -6.091786 -1.924870 -1.148722  
26 1 0 -6.170325 -1.496216 -2.654573  
27 1 0 -6.299217 -0.417141 -1.523277  
28 6 0 -3.930526 -2.580467 -0.074942

|    |    |   |           |           |           |
|----|----|---|-----------|-----------|-----------|
| 29 | 6  | 0 | -3.537481 | -3.917900 | -0.181117 |
| 30 | 6  | 0 | -3.868700 | -4.722562 | 0.913689  |
| 31 | 6  | 0 | -4.486773 | -4.273217 | 2.005895  |
| 32 | 6  | 0 | -4.844529 | -2.938962 | 2.109501  |
| 33 | 6  | 0 | -4.561165 | -2.096006 | 1.051875  |
| 34 | 6  | 0 | -2.743405 | -4.417091 | -1.351036 |
| 35 | 6  | 0 | -3.218501 | -5.772304 | -1.879589 |
| 36 | 1  | 0 | -3.237334 | -6.408158 | -1.160273 |
| 37 | 1  | 0 | -2.617282 | -6.078198 | -2.561382 |
| 38 | 1  | 0 | -4.100692 | -5.679533 | -2.247930 |
| 39 | 6  | 0 | -1.265249 | -4.513108 | -0.965484 |
| 40 | 1  | 0 | -0.951616 | -3.651630 | -0.678966 |
| 41 | 1  | 0 | -0.754039 | -4.801185 | -1.727045 |
| 42 | 1  | 0 | -1.160762 | -5.146678 | -0.252564 |
| 43 | 6  | 0 | -3.945046 | 1.410207  | -2.054612 |
| 44 | 6  | 0 | -4.205935 | 2.575653  | -2.953371 |
| 45 | 1  | 0 | -4.280814 | 3.375466  | -2.426758 |
| 46 | 1  | 0 | -5.022881 | 2.432070  | -3.435929 |
| 47 | 1  | 0 | -3.479994 | 2.669176  | -3.574825 |
| 48 | 6  | 0 | -3.652669 | 2.677734  | -0.075475 |
| 49 | 6  | 0 | -4.641162 | 2.969572  | 0.868363  |
| 50 | 6  | 0 | -4.446268 | 4.099082  | 1.650030  |
| 51 | 6  | 0 | -3.329395 | 4.893029  | 1.516565  |
| 52 | 6  | 0 | -2.380753 | 4.600231  | 0.572637  |
| 53 | 6  | 0 | -2.535840 | 3.487717  | -0.227047 |
| 54 | 6  | 0 | -5.870955 | 2.099481  | 0.968797  |
| 55 | 6  | 0 | -6.904465 | 2.519616  | -0.066748 |
| 56 | 1  | 0 | -7.202563 | 3.411803  | 0.123697  |
| 57 | 1  | 0 | -7.652825 | 1.918078  | -0.034507 |
| 58 | 1  | 0 | -6.510077 | 2.493668  | -0.940994 |
| 59 | 6  | 0 | -6.505344 | 2.084019  | 2.364325  |
| 60 | 1  | 0 | -5.825671 | 1.911567  | 3.021302  |
| 61 | 1  | 0 | -7.171417 | 1.392791  | 2.406236  |
| 62 | 1  | 0 | -6.912835 | 2.933227  | 2.539671  |
| 63 | 1  | 0 | 2.655230  | 1.199916  | -3.845393 |
| 64 | 1  | 0 | 3.404316  | -0.872897 | -3.515165 |
| 65 | 1  | 0 | 1.834315  | -2.474982 | -2.848538 |
| 66 | 1  | 0 | -0.287553 | -2.068439 | -2.397481 |
| 67 | 1  | 0 | -0.623664 | 2.406848  | -3.216657 |
| 68 | 1  | 0 | -3.527049 | -5.496860 | 0.780988  |
| 69 | 1  | 0 | -4.706301 | -4.730062 | 2.803385  |
| 70 | 1  | 0 | -5.227296 | -2.596463 | 2.784907  |
| 71 | 1  | 0 | -4.795310 | -1.214323 | 1.081259  |
| 72 | 1  | 0 | -2.826831 | -3.811705 | -2.100233 |
| 73 | 1  | 0 | -5.041747 | 4.344775  | 2.343442  |
| 74 | 1  | 0 | -3.322704 | 5.561882  | 2.121677  |
| 75 | 1  | 0 | -1.641429 | 5.183719  | 0.456500  |
| 76 | 1  | 0 | -1.893421 | 3.336427  | -0.866954 |
| 77 | 1  | 0 | -5.612911 | 1.174631  | 0.717379  |
| 78 | 7  | 0 | -1.519237 | 0.154047  | -2.581712 |
| 79 | 7  | 0 | -3.535959 | -1.658124 | -1.095997 |
| 80 | 7  | 0 | -3.736426 | 1.452274  | -0.810506 |
| 81 | 81 | 0 | -1.816362 | -0.095993 | 0.135685  |
| 82 | 81 | 0 | 1.816323  | 0.095450  | -0.136066 |
| 83 | 6  | 0 | 0.170681  | 0.151034  | 2.958188  |
| 84 | 6  | 0 | -0.683944 | -0.872124 | 3.360551  |
| 85 | 6  | 0 | -2.019167 | -0.532970 | 3.582331  |
| 86 | 6  | 0 | -2.484871 | 0.764635  | 3.385494  |
| 87 | 6  | 0 | -1.626623 | 1.747215  | 2.978002  |
| 88 | 6  | 0 | -0.292974 | 1.440276  | 2.765207  |
| 89 | 6  | 0 | 3.902984  | -0.051837 | 2.737600  |
| 90 | 1  | 0 | 4.514774  | -0.085344 | 3.503551  |

|     |   |   |           |           |           |
|-----|---|---|-----------|-----------|-----------|
| 91  | 6 | 0 | 2.503207  | 0.226889  | 3.275832  |
| 92  | 6 | 0 | 2.460125  | 0.972387  | 4.569111  |
| 93  | 1 | 0 | 1.545852  | 1.129669  | 4.817671  |
| 94  | 1 | 0 | 2.892539  | 0.452974  | 5.252601  |
| 95  | 1 | 0 | 2.914375  | 1.812959  | 4.470934  |
| 96  | 6 | 0 | -0.183997 | -2.270660 | 3.616204  |
| 97  | 6 | 0 | -0.075061 | -2.537824 | 5.096170  |
| 98  | 1 | 0 | -0.950105 | -2.513326 | 5.490807  |
| 99  | 1 | 0 | 0.315592  | -3.402216 | 5.238458  |
| 100 | 1 | 0 | 0.477109  | -1.865605 | 5.502617  |
| 101 | 6 | 0 | -1.012327 | -3.333367 | 2.953071  |
| 102 | 1 | 0 | -1.034283 | -3.176854 | 2.005995  |
| 103 | 1 | 0 | -0.627206 | -4.195139 | 3.127848  |
| 104 | 1 | 0 | -1.906942 | -3.305832 | 3.303225  |
| 105 | 6 | 0 | 4.397299  | 1.039672  | 1.801173  |
| 106 | 6 | 0 | 5.869514  | 1.237852  | 1.780905  |
| 107 | 1 | 0 | 6.092028  | 1.925122  | 1.148879  |
| 108 | 1 | 0 | 6.169608  | 1.496679  | 2.654918  |
| 109 | 1 | 0 | 6.299178  | 0.416598  | 1.522896  |
| 110 | 6 | 0 | 3.929808  | 2.580930  | 0.075287  |
| 111 | 6 | 0 | 3.537442  | 3.917358  | 0.180736  |
| 112 | 6 | 0 | 3.868942  | 4.722814  | -0.913532 |
| 113 | 6 | 0 | 4.487014  | 4.273469  | -2.005739 |
| 114 | 6 | 0 | 4.843811  | 2.939425  | -2.109156 |
| 115 | 6 | 0 | 4.561407  | 2.096258  | -1.051719 |
| 116 | 6 | 0 | 2.743647  | 4.417343  | 1.351192  |
| 117 | 6 | 0 | 3.218742  | 5.772556  | 1.879746  |
| 118 | 1 | 0 | 3.237295  | 6.407615  | 1.159892  |
| 119 | 1 | 0 | 2.617523  | 6.078450  | 2.561539  |
| 120 | 1 | 0 | 4.100653  | 5.678990  | 2.247549  |
| 121 | 6 | 0 | 1.265490  | 4.513361  | 0.965640  |
| 122 | 1 | 0 | 0.951858  | 3.651882  | 0.679122  |
| 123 | 1 | 0 | 0.754281  | 4.801437  | 1.727201  |
| 124 | 1 | 0 | 1.161003  | 5.146930  | 0.252721  |
| 125 | 6 | 0 | 3.945288  | -1.409955 | 2.054769  |
| 126 | 6 | 0 | 4.206177  | -2.575401 | 2.953528  |
| 127 | 1 | 0 | 4.281056  | -3.375214 | 2.426914  |
| 128 | 1 | 0 | 5.023122  | -2.431818 | 3.436086  |
| 129 | 1 | 0 | 3.480273  | -2.669493 | 3.575803  |
| 130 | 6 | 0 | 3.652911  | -2.677482 | 0.075632  |
| 131 | 6 | 0 | 4.640444  | -2.969109 | -0.868017 |
| 132 | 6 | 0 | 4.445269  | -4.099414 | -1.650222 |
| 133 | 6 | 0 | 3.329636  | -4.892777 | -1.516408 |
| 134 | 6 | 0 | 2.380994  | -4.599979 | -0.572480 |
| 135 | 6 | 0 | 2.536082  | -3.487465 | 0.227203  |
| 136 | 6 | 0 | 5.870238  | -2.099018 | -0.968451 |
| 137 | 6 | 0 | 6.903748  | -2.519153 | 0.067093  |
| 138 | 1 | 0 | 7.202804  | -3.411550 | -0.123541 |
| 139 | 1 | 0 | 7.653067  | -1.917826 | 0.034663  |
| 140 | 1 | 0 | 6.509079  | -2.494000 | 0.940802  |
| 141 | 6 | 0 | 6.505586  | -2.083767 | -2.364168 |
| 142 | 1 | 0 | 5.825913  | -1.911315 | -3.021146 |
| 143 | 1 | 0 | 7.170699  | -1.392328 | -2.405890 |
| 144 | 1 | 0 | 6.913077  | -2.932975 | -2.539515 |
| 145 | 1 | 0 | -2.654988 | -1.199664 | 3.845550  |
| 146 | 1 | 0 | -3.404074 | 0.873149  | 3.515322  |
| 147 | 1 | 0 | -1.834074 | 2.475234  | 2.848695  |
| 148 | 1 | 0 | 0.287795  | 2.068691  | 2.397638  |
| 149 | 1 | 0 | 0.623905  | -2.406596 | 3.216814  |
| 150 | 1 | 0 | 3.527009  | 5.496317  | -0.781369 |
| 151 | 1 | 0 | 4.706543  | 4.730314  | -2.803228 |
| 152 | 1 | 0 | 5.227537  | 2.596715  | -2.784751 |

|     |   |   |          |           |           |
|-----|---|---|----------|-----------|-----------|
| 153 | 1 | 0 | 4.795551 | 1.214575  | -1.081102 |
| 154 | 1 | 0 | 2.827073 | 3.811957  | 2.100390  |
| 155 | 1 | 0 | 5.041988 | -4.344523 | -2.343285 |
| 156 | 1 | 0 | 3.321986 | -5.561420 | -2.121332 |
| 157 | 1 | 0 | 1.641671 | -5.183467 | -0.456343 |
| 158 | 1 | 0 | 1.893663 | -3.336175 | 0.867111  |
| 159 | 1 | 0 | 5.613153 | -1.174379 | -0.717222 |
| 160 | 7 | 0 | 1.519479 | -0.153795 | 2.581869  |
| 161 | 7 | 0 | 3.536200 | 1.658376  | 1.096154  |
| 162 | 7 | 0 | 3.736668 | -1.452022 | 0.810662  |

-----  
Rotational constants (GHZ): 0.0363398 0.0248776 0.0221224

Standard basis: LANL2DZ (5D, 7F)

There are 874 symmetry adapted basis functions of A symmetry.

Integral buffers will be 262144 words long.

Raffenetti 1 integral format.

Two-electron integral symmetry is turned on.

874 basis functions, 2254 primitive gaussians, 878 cartesian basis functions

280 alpha electrons 280 beta electrons

nuclear repulsion energy 14838.1292451976 Hartrees.

NAtoms= 162 NActive= 162 NUniq= 162 SFac= 1.00D+00 NAtFMM= 50 NAOKFM=T Big=T

One-electron integrals computed using PRISM.

1 Symmetry operations used in ECPInt.

ECPInt: NShTT= 153735 NPrTT= 1086464 LenC2= 123334 LenP2D= 411860.

LDataN: DoStor=T MaxTD1= 6 Len= 172

NBasis= 874 RedAO= T NBF= 874

NBsUse= 874 1.00D-06 NBFU= 874

Initial guess orbitals will be localized using method 0.

Harris functional with IExCor= 205 diagonalized for initial guess.

ExpMin= 4.44D-02 ExpMax= 5.91D+03 ExpMxC= 2.05D+02 IAcc=2 IRadAn= 0 AccDes= 0.00D+00

HarFok: IExCor= 205 AccDes= 0.00D+00 IRadAn= 0 IDoV= 1

ScaDFX= 1.000000 1.000000 1.000000 1.000000

Defaulting to unpruned grid for atomic number 81.

FoFCou: FMM=F IPFlag= 0 FMFlag= 100000 FMFlg1= 2001

NFxFlg= 0 DoJE=T BraDBF=F KetDBF=T FulRan=T

Omega= 0.000000 0.000000 1.000000 0.000000 0.000000 ICntrl= 500 IOpCl= 0

NMat0= 1 NMatS0= 1 NMatT0= 0 NMatD0= 1 NMtDS0= 0 NMtDT0= 0

IICent= 4 NGrid= 0.

Petite list used in FoFCou.

LocMO: Using Boys method

Initial Trace= 0.32263912D-01 Initial TraceA= 0.26228830D+04

RMSG= 0.21826247D-06

LocMO: Using Boys method

Initial Trace= 0.61616713D-01 Initial TraceA= 0.76698294D+02

Initial Trace= 0.61616713D-01 Initial TraceA= 0.76698294D+02

Initial Trace= 0.61616713D-01 Initial TraceA= 0.76698294D+02

Localization failed after 3 tries of 1000 iterations each. Last change= 0.81024714D-05

RMSG= 0.12953000D-03

Initial guess orbital symmetries:

Occupied (A) (A)

(A) (A) (A) (A) (A) (A) (A) (A) (A) (A) (A) (A)

(A) (A) (A) (A) (A) (A) (A) (A) (A) (A) (A) (A)

(A) (A) (A) (A) (A) (A) (A) (A) (A) (A) (A) (A)

(A) (A) (A) (A) (A) (A) (A) (A) (A) (A) (A) (A)

(A) (A) (A) (A) (A) (A) (A) (A) (A) (A) (A) (A)

(A) (A) (A) (A) (A) (A) (A) (A) (A) (A) (A) (A)

(A) (A) (A) (A) (A) (A) (A) (A) (A) (A) (A) (A)

(A) (A) (A) (A) (A) (A) (A) (A) (A) (A) (A) (A)

(A) (A) (A) (A) (A) (A) (A) (A) (A) (A) (A) (A)

(A) (A) (A) (A) (A) (A) (A) (A) (A) (A) (A) (A)

(A) (A) (A) (A) (A) (A) (A) (A) (A) (A) (A) (A)

(A) (A) (A) (A) (A) (A) (A) (A) (A) (A) (A) (A)









|                            |          |          |          |          |          |
|----------------------------|----------|----------|----------|----------|----------|
| Alpha occ. eigenvalues --  | -0.82486 | -0.82475 | -0.82172 | -0.82137 | -0.81959 |
| Alpha occ. eigenvalues --  | -0.81944 | -0.80653 | -0.80617 | -0.80424 | -0.80409 |
| Alpha occ. eigenvalues --  | -0.79960 | -0.79941 | -0.79866 | -0.79836 | -0.79419 |
| Alpha occ. eigenvalues --  | -0.79408 | -0.79190 | -0.79163 | -0.78524 | -0.78510 |
| Alpha occ. eigenvalues --  | -0.78404 | -0.78325 | -0.78203 | -0.78088 | -0.77971 |
| Alpha occ. eigenvalues --  | -0.77966 | -0.77560 | -0.77535 | -0.76965 | -0.76950 |
| Alpha occ. eigenvalues --  | -0.75954 | -0.75814 | -0.75002 | -0.74988 | -0.74392 |
| Alpha occ. eigenvalues --  | -0.74358 | -0.74083 | -0.74069 | -0.73975 | -0.73942 |
| Alpha occ. eigenvalues --  | -0.73336 | -0.73334 | -0.73221 | -0.73182 | -0.72941 |
| Alpha occ. eigenvalues --  | -0.72896 | -0.72617 | -0.72607 | -0.72505 | -0.72498 |
| Alpha occ. eigenvalues --  | -0.72264 | -0.72248 | -0.71716 | -0.71176 | -0.70742 |
| Alpha occ. eigenvalues --  | -0.70652 | -0.70188 | -0.70103 | -0.69421 | -0.68977 |
| Alpha occ. eigenvalues --  | -0.68526 | -0.68422 | -0.67861 | -0.67389 | -0.66677 |
| Alpha occ. eigenvalues --  | -0.66619 | -0.66054 | -0.65860 | -0.65342 | -0.65264 |
| Alpha occ. eigenvalues --  | -0.64990 | -0.64707 | -0.64308 | -0.64160 | -0.63742 |
| Alpha occ. eigenvalues --  | -0.63666 | -0.63308 | -0.63154 | -0.63102 | -0.62911 |
| Alpha occ. eigenvalues --  | -0.62858 | -0.62781 | -0.62475 | -0.62222 | -0.61801 |
| Alpha occ. eigenvalues --  | -0.61765 | -0.61241 | -0.61078 | -0.60814 | -0.60772 |
| Alpha occ. eigenvalues --  | -0.59364 | -0.59202 | -0.59015 | -0.58975 | -0.58936 |
| Alpha occ. eigenvalues --  | -0.58893 | -0.53377 | -0.50446 | -0.50333 | -0.50006 |
| Alpha occ. eigenvalues --  | -0.49328 | -0.49317 | -0.49097 | -0.48996 | -0.48929 |
| Alpha occ. eigenvalues --  | -0.47901 | -0.47640 | -0.47141 | -0.46997 | -0.46472 |
| Alpha virt. eigenvalues -- | -0.09331 | -0.09302 | -0.06106 | -0.05745 | -0.04694 |
| Alpha virt. eigenvalues -- | -0.04613 | -0.04321 | -0.04315 | -0.03390 | -0.03381 |
| Alpha virt. eigenvalues -- | -0.03221 | -0.02677 | -0.02484 | -0.01903 | -0.01763 |
| Alpha virt. eigenvalues -- | -0.01260 | -0.00873 | -0.00799 | -0.00186 | -0.00034 |
| Alpha virt. eigenvalues -- | 0.00170  | 0.01132  | 0.03232  | 0.04732  | 0.05269  |
| Alpha virt. eigenvalues -- | 0.05957  | 0.05971  | 0.06623  | 0.06991  | 0.07401  |
| Alpha virt. eigenvalues -- | 0.07405  | 0.08013  | 0.08023  | 0.09214  | 0.09332  |
| Alpha virt. eigenvalues -- | 0.09642  | 0.09957  | 0.09972  | 0.10562  | 0.10808  |
| Alpha virt. eigenvalues -- | 0.11008  | 0.11108  | 0.11261  | 0.11331  | 0.11912  |
| Alpha virt. eigenvalues -- | 0.12028  | 0.12297  | 0.12396  | 0.12853  | 0.12904  |
| Alpha virt. eigenvalues -- | 0.12953  | 0.13059  | 0.13218  | 0.13472  | 0.13771  |
| Alpha virt. eigenvalues -- | 0.13907  | 0.14103  | 0.14186  | 0.14482  | 0.14509  |
| Alpha virt. eigenvalues -- | 0.14682  | 0.14877  | 0.15002  | 0.15188  | 0.15244  |
| Alpha virt. eigenvalues -- | 0.15529  | 0.15810  | 0.16049  | 0.16119  | 0.16121  |
| Alpha virt. eigenvalues -- | 0.16255  | 0.16331  | 0.16666  | 0.16900  | 0.17241  |
| Alpha virt. eigenvalues -- | 0.17474  | 0.17608  | 0.17750  | 0.18189  | 0.18247  |
| Alpha virt. eigenvalues -- | 0.18286  | 0.18441  | 0.18507  | 0.18782  | 0.18789  |
| Alpha virt. eigenvalues -- | 0.18905  | 0.19263  | 0.19363  | 0.19602  | 0.19740  |
| Alpha virt. eigenvalues -- | 0.19765  | 0.19932  | 0.20419  | 0.20508  | 0.21098  |
| Alpha virt. eigenvalues -- | 0.21246  | 0.21390  | 0.21575  | 0.21619  | 0.21690  |
| Alpha virt. eigenvalues -- | 0.22012  | 0.22093  | 0.22390  | 0.22464  | 0.22483  |
| Alpha virt. eigenvalues -- | 0.22885  | 0.22987  | 0.23196  | 0.23242  | 0.23770  |
| Alpha virt. eigenvalues -- | 0.24017  | 0.24211  | 0.24383  | 0.24555  | 0.24618  |
| Alpha virt. eigenvalues -- | 0.24737  | 0.24801  | 0.25335  | 0.25434  | 0.25515  |
| Alpha virt. eigenvalues -- | 0.25721  | 0.25845  | 0.26132  | 0.26430  | 0.26443  |
| Alpha virt. eigenvalues -- | 0.26493  | 0.26770  | 0.26805  | 0.27074  | 0.27363  |
| Alpha virt. eigenvalues -- | 0.27632  | 0.28015  | 0.28155  | 0.28449  | 0.28499  |
| Alpha virt. eigenvalues -- | 0.28536  | 0.28781  | 0.28873  | 0.28949  | 0.29064  |
| Alpha virt. eigenvalues -- | 0.29497  | 0.29502  | 0.29756  | 0.29769  | 0.29951  |
| Alpha virt. eigenvalues -- | 0.30347  | 0.30419  | 0.30475  | 0.30744  | 0.30995  |
| Alpha virt. eigenvalues -- | 0.31041  | 0.31769  | 0.31967  | 0.32171  | 0.32402  |
| Alpha virt. eigenvalues -- | 0.32568  | 0.32700  | 0.32722  | 0.32870  | 0.32894  |
| Alpha virt. eigenvalues -- | 0.33374  | 0.33413  | 0.33723  | 0.33799  | 0.33872  |
| Alpha virt. eigenvalues -- | 0.33938  | 0.34121  | 0.34220  | 0.34299  | 0.34712  |
| Alpha virt. eigenvalues -- | 0.35170  | 0.35338  | 0.35515  | 0.35661  | 0.35811  |
| Alpha virt. eigenvalues -- | 0.35852  | 0.36105  | 0.36277  | 0.36357  | 0.36526  |
| Alpha virt. eigenvalues -- | 0.36772  | 0.36833  | 0.37338  | 0.37479  | 0.37620  |
| Alpha virt. eigenvalues -- | 0.37867  | 0.38097  | 0.38180  | 0.38241  | 0.38410  |
| Alpha virt. eigenvalues -- | 0.38537  | 0.38578  | 0.38863  | 0.39104  | 0.39187  |
| Alpha virt. eigenvalues -- | 0.39503  | 0.39779  | 0.39943  | 0.40312  | 0.40421  |

|                            |         |         |         |         |         |
|----------------------------|---------|---------|---------|---------|---------|
| Alpha virt. eigenvalues -- | 0.40705 | 0.41010 | 0.41151 | 0.41298 | 0.41509 |
| Alpha virt. eigenvalues -- | 0.41540 | 0.41853 | 0.41980 | 0.42295 | 0.42471 |
| Alpha virt. eigenvalues -- | 0.42474 | 0.42720 | 0.43032 | 0.43134 | 0.43309 |
| Alpha virt. eigenvalues -- | 0.43411 | 0.43652 | 0.43778 | 0.44063 | 0.44439 |
| Alpha virt. eigenvalues -- | 0.44518 | 0.44727 | 0.44960 | 0.45034 | 0.45369 |
| Alpha virt. eigenvalues -- | 0.45560 | 0.45844 | 0.46069 | 0.46123 | 0.46151 |
| Alpha virt. eigenvalues -- | 0.46351 | 0.46524 | 0.46593 | 0.46792 | 0.47413 |
| Alpha virt. eigenvalues -- | 0.47528 | 0.47845 | 0.47879 | 0.48061 | 0.48274 |
| Alpha virt. eigenvalues -- | 0.48562 | 0.48898 | 0.49426 | 0.49543 | 0.49663 |
| Alpha virt. eigenvalues -- | 0.49667 | 0.49902 | 0.50145 | 0.50405 | 0.50540 |
| Alpha virt. eigenvalues -- | 0.50758 | 0.51013 | 0.51134 | 0.51169 | 0.51528 |
| Alpha virt. eigenvalues -- | 0.51636 | 0.51912 | 0.52047 | 0.52319 | 0.52588 |
| Alpha virt. eigenvalues -- | 0.52700 | 0.52842 | 0.53147 | 0.53285 | 0.53427 |
| Alpha virt. eigenvalues -- | 0.53590 | 0.53845 | 0.53981 | 0.54173 | 0.54198 |
| Alpha virt. eigenvalues -- | 0.55025 | 0.55334 | 0.55507 | 0.55575 | 0.55635 |
| Alpha virt. eigenvalues -- | 0.56209 | 0.56320 | 0.56712 | 0.56782 | 0.57397 |
| Alpha virt. eigenvalues -- | 0.57573 | 0.57618 | 0.57858 | 0.58232 | 0.58375 |
| Alpha virt. eigenvalues -- | 0.58461 | 0.58708 | 0.58718 | 0.59226 | 0.59548 |
| Alpha virt. eigenvalues -- | 0.59733 | 0.59943 | 0.60186 | 0.60639 | 0.60759 |
| Alpha virt. eigenvalues -- | 0.60986 | 0.61144 | 0.61269 | 0.61854 | 0.62084 |
| Alpha virt. eigenvalues -- | 0.62211 | 0.62447 | 0.62780 | 0.62935 | 0.63194 |
| Alpha virt. eigenvalues -- | 0.63424 | 0.63446 | 0.63749 | 0.63936 | 0.64115 |
| Alpha virt. eigenvalues -- | 0.64393 | 0.64596 | 0.64635 | 0.65179 | 0.65466 |
| Alpha virt. eigenvalues -- | 0.65794 | 0.66062 | 0.66169 | 0.66414 | 0.66633 |
| Alpha virt. eigenvalues -- | 0.66686 | 0.66836 | 0.67144 | 0.67297 | 0.67706 |
| Alpha virt. eigenvalues -- | 0.67835 | 0.68238 | 0.68621 | 0.68728 | 0.68791 |
| Alpha virt. eigenvalues -- | 0.69179 | 0.69189 | 0.69551 | 0.69590 | 0.70057 |
| Alpha virt. eigenvalues -- | 0.70622 | 0.70636 | 0.71069 | 0.71196 | 0.71750 |
| Alpha virt. eigenvalues -- | 0.71921 | 0.72246 | 0.72270 | 0.72556 | 0.72818 |
| Alpha virt. eigenvalues -- | 0.73124 | 0.73133 | 0.73575 | 0.73882 | 0.73968 |
| Alpha virt. eigenvalues -- | 0.74386 | 0.74707 | 0.74743 | 0.75460 | 0.75709 |
| Alpha virt. eigenvalues -- | 0.75967 | 0.76000 | 0.76771 | 0.76899 | 0.77451 |
| Alpha virt. eigenvalues -- | 0.77500 | 0.77853 | 0.78321 | 0.78683 | 0.78729 |
| Alpha virt. eigenvalues -- | 0.79126 | 0.80095 | 0.80108 | 0.80460 | 0.81081 |
| Alpha virt. eigenvalues -- | 0.81414 | 0.81601 | 0.82021 | 0.82660 | 0.82853 |
| Alpha virt. eigenvalues -- | 0.83223 | 0.83503 | 0.83878 | 0.84953 | 0.85425 |
| Alpha virt. eigenvalues -- | 0.85785 | 0.86277 | 0.86398 | 0.87373 | 0.88317 |
| Alpha virt. eigenvalues -- | 0.88361 | 0.88574 | 0.89227 | 0.89667 | 0.89926 |
| Alpha virt. eigenvalues -- | 0.90148 | 0.90585 | 0.91349 | 0.91483 | 0.91798 |
| Alpha virt. eigenvalues -- | 0.92350 | 0.92760 | 0.92972 | 0.93887 | 0.94374 |
| Alpha virt. eigenvalues -- | 0.94823 | 0.96183 | 0.96978 | 0.97136 | 0.97275 |
| Alpha virt. eigenvalues -- | 0.97432 | 0.98346 | 0.98655 | 0.99130 | 0.99769 |
| Alpha virt. eigenvalues -- | 1.00296 | 1.00628 | 1.00865 | 1.01814 | 1.02757 |
| Alpha virt. eigenvalues -- | 1.04318 | 1.05952 | 1.08030 | 1.09066 | 1.09234 |
| Alpha virt. eigenvalues -- | 1.09642 | 1.12297 | 1.13442 | 1.13620 | 1.14103 |
| Alpha virt. eigenvalues -- | 1.16232 | 1.16783 | 1.16892 | 1.18859 | 1.21355 |
| Alpha virt. eigenvalues -- | 1.21982 | 1.22293 | 1.22734 | 1.22892 | 1.22957 |
| Alpha virt. eigenvalues -- | 1.23305 | 1.23510 | 1.24306 | 1.24838 | 1.25693 |
| Alpha virt. eigenvalues -- | 1.25921 | 1.26932 | 1.27269 | 1.28373 | 1.28803 |
| Alpha virt. eigenvalues -- | 1.29143 | 1.31460 | 1.31718 | 1.31767 | 1.32328 |
| Alpha virt. eigenvalues -- | 1.32673 | 1.33087 | 1.34621 | 1.35238 | 1.35996 |
| Alpha virt. eigenvalues -- | 1.36035 | 1.37513 | 1.38027 | 1.38089 | 1.38657 |
| Alpha virt. eigenvalues -- | 1.38770 | 1.38961 | 1.39263 | 1.39272 | 1.39895 |
| Alpha virt. eigenvalues -- | 1.40550 | 1.40710 | 1.41287 | 1.41496 | 1.41839 |
| Alpha virt. eigenvalues -- | 1.42011 | 1.42391 | 1.42515 | 1.42709 | 1.42735 |
| Alpha virt. eigenvalues -- | 1.43241 | 1.43410 | 1.43817 | 1.44272 | 1.44410 |
| Alpha virt. eigenvalues -- | 1.44662 | 1.44726 | 1.44944 | 1.45059 | 1.45426 |
| Alpha virt. eigenvalues -- | 1.45859 | 1.46335 | 1.46648 | 1.46673 | 1.47546 |
| Alpha virt. eigenvalues -- | 1.47651 | 1.48010 | 1.48379 | 1.48542 | 1.48953 |
| Alpha virt. eigenvalues -- | 1.49329 | 1.49693 | 1.49749 | 1.50642 | 1.50730 |
| Alpha virt. eigenvalues -- | 1.51148 | 1.51167 | 1.51586 | 1.51720 | 1.52164 |
| Alpha virt. eigenvalues -- | 1.52178 | 1.52416 | 1.52603 | 1.53687 | 1.53768 |

|                            |         |         |          |          |         |
|----------------------------|---------|---------|----------|----------|---------|
| Alpha virt. eigenvalues -- | 1.54347 | 1.54387 | 1.55288  | 1.55421  | 1.55820 |
| Alpha virt. eigenvalues -- | 1.56069 | 1.56622 | 1.56904  | 1.57221  | 1.57494 |
| Alpha virt. eigenvalues -- | 1.58083 | 1.58523 | 1.58545  | 1.58863  | 1.59323 |
| Alpha virt. eigenvalues -- | 1.59603 | 1.60139 | 1.60507  | 1.60771  | 1.61000 |
| Alpha virt. eigenvalues -- | 1.61110 | 1.61464 | 1.62028  | 1.62308  | 1.63412 |
| Alpha virt. eigenvalues -- | 1.63742 | 1.64264 | 1.64439  | 1.64682  | 1.65232 |
| Alpha virt. eigenvalues -- | 1.65442 | 1.66726 | 1.67039  | 1.67645  | 1.68252 |
| Alpha virt. eigenvalues -- | 1.68797 | 1.69084 | 1.69282  | 1.70001  | 1.70716 |
| Alpha virt. eigenvalues -- | 1.71119 | 1.71767 | 1.72397  | 1.72433  | 1.74789 |
| Alpha virt. eigenvalues -- | 1.75517 | 1.76024 | 1.76056  | 1.77146  | 1.77785 |
| Alpha virt. eigenvalues -- | 1.78425 | 1.79487 | 1.80623  | 1.80675  | 1.81787 |
| Alpha virt. eigenvalues -- | 1.81862 | 1.82416 | 1.82621  | 1.84087  | 1.84388 |
| Alpha virt. eigenvalues -- | 1.85199 | 1.85368 | 1.86986  | 1.87814  | 1.88056 |
| Alpha virt. eigenvalues -- | 1.88411 | 1.89587 | 1.90192  | 1.90529  | 1.92132 |
| Alpha virt. eigenvalues -- | 1.95009 | 1.95599 | 1.95696  | 1.97487  | 2.04621 |
| Alpha virt. eigenvalues -- | 2.05814 | 2.06451 | 2.06695  | 2.09298  | 2.09788 |
| Alpha virt. eigenvalues -- | 2.16137 | 2.17473 | 11.53991 | 11.57164 |         |

Condensed to atoms (all electrons):

Mulliken atomic charges:

1

|      |           |
|------|-----------|
| 1 C  | -0.252190 |
| 2 H  | 0.250828  |
| 3 C  | 0.216690  |
| 4 C  | -0.669704 |
| 5 H  | 0.265583  |
| 6 H  | 0.246625  |
| 7 H  | 0.241505  |
| 8 C  | 0.107307  |
| 9 C  | 0.209248  |
| 10 C | -0.372072 |
| 11 C | -0.306830 |
| 12 C | -0.435532 |
| 13 C | -0.386803 |
| 14 C | -0.219147 |
| 15 C | -0.594735 |
| 16 H | 0.206865  |
| 17 H | 0.207936  |
| 18 H | 0.194467  |
| 19 C | -0.609538 |
| 20 H | 0.196345  |
| 21 H | 0.216148  |
| 22 H | 0.206132  |
| 23 C | 0.231423  |
| 24 C | -0.679376 |
| 25 H | 0.270524  |
| 26 H | 0.251100  |
| 27 H | 0.241855  |
| 28 C | 0.111095  |
| 29 C | 0.192873  |
| 30 C | -0.340852 |
| 31 C | -0.265355 |
| 32 C | -0.348456 |
| 33 C | -0.392464 |
| 34 C | -0.218081 |
| 35 C | -0.605227 |
| 36 H | 0.196501  |
| 37 H | 0.208089  |
| 38 H | 0.213872  |
| 39 C | -0.613371 |
| 40 H | 0.189681  |
| 41 H | 0.211336  |
| 42 H | 0.209494  |

43 C 0.222424  
44 C -0.670828  
45 H 0.267531  
46 H 0.247170  
47 H 0.239748  
48 C 0.169735  
49 C 0.211035  
50 C -0.359286  
51 C -0.321570  
52 C -0.232270  
53 C -0.402102  
54 C -0.188631  
55 C -0.600123  
56 H 0.220378  
57 H 0.212517  
58 H 0.184616  
59 C -0.625848  
60 H 0.193974  
61 H 0.216849  
62 H 0.209332  
63 H 0.275532  
64 H 0.278348  
65 H 0.505514  
66 H 0.300290  
67 H 0.225592  
68 H 0.317010  
69 H 0.269346  
70 H 0.351199  
71 H 0.308607  
72 H 0.202696  
73 H 0.276545  
74 H 0.303183  
75 H 0.265057  
76 H 0.311626  
77 H 0.179088  
78 N -0.437361  
79 N -0.471568  
80 N -0.482800  
81 Tl 0.843670  
82 Tl 0.843656  
83 C 0.107556  
84 C 0.209256  
85 C -0.372062  
86 C -0.306827  
87 C -0.435517  
88 C -0.386861  
89 C -0.251924  
90 H 0.250517  
91 C 0.216378  
92 C -0.670271  
93 H 0.265719  
94 H 0.246739  
95 H 0.241322  
96 C -0.219981  
97 C -0.594918  
98 H 0.206827  
99 H 0.207902  
100 H 0.194854  
101 C -0.609052  
102 H 0.196359  
103 H 0.215704  
104 H 0.206548

|     |   |           |
|-----|---|-----------|
| 105 | C | 0.231597  |
| 106 | C | -0.679641 |
| 107 | H | 0.270587  |
| 108 | H | 0.251188  |
| 109 | H | 0.241371  |
| 110 | C | 0.111142  |
| 111 | C | 0.192365  |
| 112 | C | -0.341176 |
| 113 | C | -0.265516 |
| 114 | C | -0.347540 |
| 115 | C | -0.392533 |
| 116 | C | -0.218126 |
| 117 | C | -0.604925 |
| 118 | H | 0.196419  |
| 119 | H | 0.208037  |
| 120 | H | 0.213894  |
| 121 | C | -0.613457 |
| 122 | H | 0.189680  |
| 123 | H | 0.211352  |
| 124 | H | 0.209444  |
| 125 | C | 0.222759  |
| 126 | C | -0.670923 |
| 127 | H | 0.267528  |
| 128 | H | 0.247251  |
| 129 | H | 0.239643  |
| 130 | C | 0.170366  |
| 131 | C | 0.209987  |
| 132 | C | -0.358604 |
| 133 | C | -0.321508 |
| 134 | C | -0.232295 |
| 135 | C | -0.402321 |
| 136 | C | -0.189097 |
| 137 | C | -0.600182 |
| 138 | H | 0.220266  |
| 139 | H | 0.212347  |
| 140 | H | 0.184868  |
| 141 | C | -0.625824 |
| 142 | H | 0.193940  |
| 143 | H | 0.216985  |
| 144 | H | 0.209350  |
| 145 | H | 0.275485  |
| 146 | H | 0.278318  |
| 147 | H | 0.505515  |
| 148 | H | 0.300311  |
| 149 | H | 0.225709  |
| 150 | H | 0.317645  |
| 151 | H | 0.269357  |
| 152 | H | 0.350444  |
| 153 | H | 0.308662  |
| 154 | H | 0.202655  |
| 155 | H | 0.276337  |
| 156 | H | 0.303414  |
| 157 | H | 0.265042  |
| 158 | H | 0.311615  |
| 159 | H | 0.179342  |
| 160 | N | -0.436492 |
| 161 | N | -0.471150 |
| 162 | N | -0.482849 |

Sum of Mulliken atomic charges = 2.00000

Mulliken charges with hydrogens summed into heavy atoms:

1

1 C -0.001362

3 C 0.216690  
4 C 0.084009  
8 C 0.107307  
9 C 0.209248  
10 C -0.096539  
11 C -0.028482  
12 C 0.069983  
13 C -0.086513  
14 C 0.006444  
15 C 0.014533  
19 C 0.009087  
23 C 0.231423  
24 C 0.084104  
28 C 0.111095  
29 C 0.192873  
30 C -0.023842  
31 C 0.003991  
32 C 0.002743  
33 C -0.083856  
34 C -0.015385  
35 C 0.013236  
39 C -0.002860  
43 C 0.222424  
44 C 0.083622  
48 C 0.169735  
49 C 0.211035  
50 C -0.082741  
51 C -0.018387  
52 C 0.032788  
53 C -0.090476  
54 C -0.009543  
55 C 0.017389  
59 C -0.005693  
78 N -0.437361  
79 N -0.471568  
80 N -0.482800  
81 TI 0.843670  
82 TI 0.843656  
83 C 0.107556  
84 C 0.209256  
85 C -0.096577  
86 C -0.028508  
87 C 0.069998  
88 C -0.086550  
89 C -0.001407  
91 C 0.216378  
92 C 0.083509  
96 C 0.005728  
97 C 0.014664  
101 C 0.009558  
105 C 0.231597  
106 C 0.083506  
110 C 0.111142  
111 C 0.192365  
112 C -0.023531  
113 C 0.003840  
114 C 0.002904  
115 C -0.083871  
116 C -0.015471  
117 C 0.013425  
121 C -0.002982  
125 C 0.222759

126 C 0.083499  
130 C 0.170366  
131 C 0.209987  
132 C -0.082267  
133 C -0.018094  
134 C 0.032746  
135 C -0.090707  
136 C -0.009755  
137 C 0.017299  
141 C -0.005549  
160 N -0.436492  
161 N -0.471150  
162 N -0.482849

Sum of Mulliken charges with hydrogens summed into heavy atoms = 2.00000

Electronic spatial extent (au):  $\langle R^{*2} \rangle = 55202.9585$

Charge= 2.0000 electrons

Dipole moment (field-independent basis, Debye):

X= -0.0031 Y= -0.0015 Z= -0.0048 Tot= 0.0059

Quadrupole moment (field-independent basis, Debye-Ang):

XX= -298.8042 YY= -390.5274 ZZ= -383.5218

XY= -6.0084 XZ= 31.7039 YZ= -0.4827

Traceless Quadrupole moment (field-independent basis, Debye-Ang):

XX= 58.8136 YY= -32.9096 ZZ= -25.9040

XY= -6.0084 XZ= 31.7039 YZ= -0.4827

Octapole moment (field-independent basis, Debye-Ang\*\*2):

XXX= -0.0861 YYY= -0.1594 ZZZ= -0.0239 XYY= -0.0297

XXY= 0.0396 XXZ= -0.0790 XZZ= -0.0555 YZZ= -0.0228

YYZ= -0.0745 XYZ= -0.0551

Hexadecapole moment (field-independent basis, Debye-Ang\*\*3):

XXXX= -31841.8220 YYYY= -20676.0528 ZZZZ= -14703.6030 XXXY= -663.8631

XXXZ= 371.9583 YYYYX= 172.2126 YYYZ= 264.2004 ZZZX= 602.2799

ZZZY= -245.5156 XXYY= -9057.2627 XXZZ= -7206.0783 YYZZ= -5764.0171

XXYZ= 138.3847 YYXZ= -319.5868 ZZZY= 78.7356

N-N= 1.483812924520D+04 E-N=-3.672155847758D+04 KE= 3.044102641575D+03

\*\*\*\*\*Gaussian NBO Version 3.1\*\*\*\*\*

NATURAL ATOMIC ORBITAL AND  
NATURAL BOND ORBITAL ANALYSIS

\*\*\*\*\*Gaussian NBO Version 3.1\*\*\*\*\*

/RESON /: Allow strongly delocalized NBO set

Analyzing the SCF density

Job title: CSD ENTRY ofm27p-1

Storage needed: 2371396 in NPA ( 33481086 available)

NATURAL POPULATIONS: Natural atomic orbital occupancies

| NAO | Atom | No | lang | Type(AO) | Occupancy | Energy    |
|-----|------|----|------|----------|-----------|-----------|
| 1   | C    | 1  | S    | Cor( 1S) | 1.99893   | -11.27205 |
| 2   | C    | 1  | S    | Val( 2S) | 0.96186   | -0.36708  |
| 3   | C    | 1  | S    | Ryd( 3S) | 0.00101   | 1.58822   |
| 4   | C    | 1  | px   | Val( 2p) | 1.11642   | -0.24400  |
| 5   | C    | 1  | px   | Ryd( 3p) | 0.01288   | 0.55384   |
| 6   | C    | 1  | py   | Val( 2p) | 1.07397   | -0.26180  |
| 7   | C    | 1  | py   | Ryd( 3p) | 0.00747   | 0.50405   |
| 8   | C    | 1  | pz   | Val( 2p) | 1.14276   | -0.23518  |
| 9   | C    | 1  | pz   | Ryd( 3p) | 0.01640   | 0.57488   |
| 10  | H    | 2  | S    | Val( 1S) | 0.79141   | 0.08711   |



|    |   |    |    |          |         |           |
|----|---|----|----|----------|---------|-----------|
| 11 | H | 2  | S  | Ryd( 2S) | 0.00188 | 1.10628   |
| 12 | C | 3  | S  | Cor( 1S) | 1.99910 | -11.35481 |
| 13 | C | 3  | S  | Val( 2S) | 0.86100 | -0.30022  |
| 14 | C | 3  | S  | Ryd( 3S) | 0.00588 | 1.14436   |
| 15 | C | 3  | px | Val( 2p) | 0.90866 | -0.15295  |
| 16 | C | 3  | px | Ryd( 3p) | 0.00782 | 0.63484   |
| 17 | C | 3  | py | Val( 2p) | 0.79617 | -0.19456  |
| 18 | C | 3  | py | Ryd( 3p) | 0.00875 | 0.53807   |
| 19 | C | 3  | pz | Val( 2p) | 0.90593 | -0.17738  |
| 20 | C | 3  | pz | Ryd( 3p) | 0.00770 | 0.58516   |
| 21 | C | 4  | S  | Cor( 1S) | 1.99921 | -11.18998 |
| 22 | C | 4  | S  | Val( 2S) | 1.02168 | -0.29787  |
| 23 | C | 4  | S  | Ryd( 3S) | 0.00048 | 1.27553   |
| 24 | C | 4  | px | Val( 2p) | 1.24801 | -0.19929  |
| 25 | C | 4  | px | Ryd( 3p) | 0.00333 | 0.28232   |
| 26 | C | 4  | py | Val( 2p) | 1.19165 | -0.19665  |
| 27 | C | 4  | py | Ryd( 3p) | 0.00229 | 0.30510   |
| 28 | C | 4  | pz | Val( 2p) | 1.11551 | -0.20203  |
| 29 | C | 4  | pz | Ryd( 3p) | 0.00359 | 0.28427   |
| 30 | H | 5  | S  | Val( 1S) | 0.78906 | 0.11082   |
| 31 | H | 5  | S  | Ryd( 2S) | 0.00177 | 1.02062   |
| 32 | H | 6  | S  | Val( 1S) | 0.78977 | 0.09810   |
| 33 | H | 6  | S  | Ryd( 2S) | 0.00118 | 0.94870   |
| 34 | H | 7  | S  | Val( 1S) | 0.79152 | 0.09487   |
| 35 | H | 7  | S  | Ryd( 2S) | 0.00119 | 0.95575   |
| 36 | C | 8  | S  | Cor( 1S) | 1.99883 | -11.29468 |
| 37 | C | 8  | S  | Val( 2S) | 0.84033 | -0.23918  |
| 38 | C | 8  | S  | Ryd( 3S) | 0.00213 | 1.28228   |
| 39 | C | 8  | px | Val( 2p) | 0.88772 | -0.13756  |
| 40 | C | 8  | px | Ryd( 3p) | 0.01529 | 0.77112   |
| 41 | C | 8  | py | Val( 2p) | 1.06946 | -0.19183  |
| 42 | C | 8  | py | Ryd( 3p) | 0.00611 | 0.60524   |
| 43 | C | 8  | pz | Val( 2p) | 1.02354 | -0.22612  |
| 44 | C | 8  | pz | Ryd( 3p) | 0.00968 | 0.53457   |
| 45 | C | 9  | S  | Cor( 1S) | 1.99901 | -11.25586 |
| 46 | C | 9  | S  | Val( 2S) | 0.89396 | -0.26245  |
| 47 | C | 9  | S  | Ryd( 3S) | 0.00201 | 1.34440   |
| 48 | C | 9  | px | Val( 2p) | 1.05920 | -0.17506  |
| 49 | C | 9  | px | Ryd( 3p) | 0.00814 | 0.66532   |
| 50 | C | 9  | py | Val( 2p) | 1.06608 | -0.18629  |
| 51 | C | 9  | py | Ryd( 3p) | 0.01044 | 0.78458   |
| 52 | C | 9  | pz | Val( 2p) | 0.97809 | -0.19729  |
| 53 | C | 9  | pz | Ryd( 3p) | 0.00815 | 0.59846   |
| 54 | C | 10 | S  | Cor( 1S) | 1.99917 | -11.22975 |
| 55 | C | 10 | S  | Val( 2S) | 0.93608 | -0.25868  |
| 56 | C | 10 | S  | Ryd( 3S) | 0.00123 | 1.23450   |
| 57 | C | 10 | px | Val( 2p) | 1.10502 | -0.14090  |
| 58 | C | 10 | px | Ryd( 3p) | 0.00767 | 0.53040   |
| 59 | C | 10 | py | Val( 2p) | 1.10607 | -0.14228  |
| 60 | C | 10 | py | Ryd( 3p) | 0.00542 | 0.61848   |
| 61 | C | 10 | pz | Val( 2p) | 0.99658 | -0.20457  |
| 62 | C | 10 | pz | Ryd( 3p) | 0.00473 | 0.44020   |
| 63 | C | 11 | S  | Cor( 1S) | 1.99927 | -11.22864 |

|     |   |    |    |          |         |           |
|-----|---|----|----|----------|---------|-----------|
| 64  | C | 11 | S  | Val( 2S) | 0.93766 | -0.24601  |
| 65  | C | 11 | S  | Ryd( 3S) | 0.00139 | 1.15270   |
| 66  | C | 11 | px | Val( 2p) | 1.15098 | -0.07987  |
| 67  | C | 11 | px | Ryd( 3p) | 0.00767 | 0.56618   |
| 68  | C | 11 | py | Val( 2p) | 1.04558 | -0.15532  |
| 69  | C | 11 | py | Ryd( 3p) | 0.00513 | 0.49905   |
| 70  | C | 11 | pz | Val( 2p) | 1.00132 | -0.20526  |
| 71  | C | 11 | pz | Ryd( 3p) | 0.00544 | 0.45228   |
| 72  | C | 12 | S  | Cor( 1S) | 1.99869 | -11.18199 |
| 73  | C | 12 | S  | Val( 2S) | 0.87488 | -0.08383  |
| 74  | C | 12 | S  | Ryd( 3S) | 0.00097 | 1.16680   |
| 75  | C | 12 | px | Val( 2p) | 1.05697 | -0.14698  |
| 76  | C | 12 | px | Ryd( 3p) | 0.00547 | 0.58273   |
| 77  | C | 12 | py | Val( 2p) | 1.11289 | 0.02650   |
| 78  | C | 12 | py | Ryd( 3p) | 0.00799 | 0.45816   |
| 79  | C | 12 | pz | Val( 2p) | 0.99086 | -0.19836  |
| 80  | C | 12 | pz | Ryd( 3p) | 0.00622 | 0.50797   |
| 81  | C | 13 | S  | Cor( 1S) | 1.99915 | -11.22924 |
| 82  | C | 13 | S  | Val( 2S) | 0.92837 | -0.24426  |
| 83  | C | 13 | S  | Ryd( 3S) | 0.00129 | 1.29689   |
| 84  | C | 13 | px | Val( 2p) | 1.09602 | -0.14647  |
| 85  | C | 13 | px | Ryd( 3p) | 0.00593 | 0.64182   |
| 86  | C | 13 | py | Val( 2p) | 1.09939 | -0.14630  |
| 87  | C | 13 | py | Ryd( 3p) | 0.00857 | 0.51635   |
| 88  | C | 13 | pz | Val( 2p) | 1.04271 | -0.21043  |
| 89  | C | 13 | pz | Ryd( 3p) | 0.00534 | 0.54299   |
| 90  | C | 14 | S  | Cor( 1S) | 1.99908 | -11.20315 |
| 91  | C | 14 | S  | Val( 2S) | 0.92029 | -0.22427  |
| 92  | C | 14 | S  | Ryd( 3S) | 0.00056 | 1.61746   |
| 93  | C | 14 | px | Val( 2p) | 1.12586 | -0.10578  |
| 94  | C | 14 | px | Ryd( 3p) | 0.01017 | 0.50332   |
| 95  | C | 14 | py | Val( 2p) | 1.00669 | -0.14877  |
| 96  | C | 14 | py | Ryd( 3p) | 0.00534 | 0.50625   |
| 97  | C | 14 | pz | Val( 2p) | 1.04396 | -0.14629  |
| 98  | C | 14 | pz | Ryd( 3p) | 0.00423 | 0.57121   |
| 99  | C | 15 | S  | Cor( 1S) | 1.99932 | -11.14347 |
| 100 | C | 15 | S  | Val( 2S) | 1.00955 | -0.22887  |
| 101 | C | 15 | S  | Ryd( 3S) | 0.00068 | 1.25091   |
| 102 | C | 15 | px | Val( 2p) | 1.21737 | -0.13504  |
| 103 | C | 15 | px | Ryd( 3p) | 0.00289 | 0.28576   |
| 104 | C | 15 | py | Val( 2p) | 1.21073 | -0.13170  |
| 105 | C | 15 | py | Ryd( 3p) | 0.00357 | 0.32907   |
| 106 | C | 15 | pz | Val( 2p) | 1.06666 | -0.14271  |
| 107 | C | 15 | pz | Ryd( 3p) | 0.00339 | 0.31558   |
| 108 | H | 16 | S  | Val( 1S) | 0.81864 | 0.13188   |
| 109 | H | 16 | S  | Ryd( 2S) | 0.00159 | 0.95180   |
| 110 | H | 17 | S  | Val( 1S) | 0.81555 | 0.13883   |
| 111 | H | 17 | S  | Ryd( 2S) | 0.00132 | 0.94405   |
| 112 | H | 18 | S  | Val( 1S) | 0.82517 | 0.12471   |
| 113 | H | 18 | S  | Ryd( 2S) | 0.00153 | 0.98833   |
| 114 | C | 19 | S  | Cor( 1S) | 1.99936 | -11.14315 |
| 115 | C | 19 | S  | Val( 2S) | 1.00192 | -0.21980  |
| 116 | C | 19 | S  | Ryd( 3S) | 0.00064 | 1.29075   |
| 117 | C | 19 | px | Val( 2p) | 1.17466 | -0.14137  |

|     |   |    |    |          |         |           |
|-----|---|----|----|----------|---------|-----------|
| 118 | C | 19 | px | Ryd( 3p) | 0.00288 | 0.44358   |
| 119 | C | 19 | py | Val( 2p) | 1.14707 | -0.14346  |
| 120 | C | 19 | py | Ryd( 3p) | 0.00406 | 0.42527   |
| 121 | C | 19 | pz | Val( 2p) | 1.17746 | -0.13499  |
| 122 | C | 19 | pz | Ryd( 3p) | 0.00401 | 0.40581   |
| 123 | H | 20 | S  | Val( 1S) | 0.83176 | 0.11545   |
| 124 | H | 20 | S  | Ryd( 2S) | 0.00163 | 1.13222   |
| 125 | H | 21 | S  | Val( 1S) | 0.81431 | 0.13999   |
| 126 | H | 21 | S  | Ryd( 2S) | 0.00130 | 1.00321   |
| 127 | H | 22 | S  | Val( 1S) | 0.82356 | 0.12103   |
| 128 | H | 22 | S  | Ryd( 2S) | 0.00200 | 1.07722   |
| 129 | C | 23 | S  | Cor( 1S) | 1.99910 | -11.35409 |
| 130 | C | 23 | S  | Val( 2S) | 0.86216 | -0.30181  |
| 131 | C | 23 | S  | Ryd( 3S) | 0.00599 | 1.17906   |
| 132 | C | 23 | px | Val( 2p) | 0.94897 | -0.16292  |
| 133 | C | 23 | px | Ryd( 3p) | 0.00762 | 0.61354   |
| 134 | C | 23 | py | Val( 2p) | 0.83456 | -0.18183  |
| 135 | C | 23 | py | Ryd( 3p) | 0.00985 | 0.56420   |
| 136 | C | 23 | pz | Val( 2p) | 0.82173 | -0.17730  |
| 137 | C | 23 | pz | Ryd( 3p) | 0.00735 | 0.56772   |
| 138 | C | 24 | S  | Cor( 1S) | 1.99921 | -11.18567 |
| 139 | C | 24 | S  | Val( 2S) | 1.01945 | -0.29248  |
| 140 | C | 24 | S  | Ryd( 3S) | 0.00052 | 1.30306   |
| 141 | C | 24 | px | Val( 2p) | 1.08138 | -0.20344  |
| 142 | C | 24 | px | Ryd( 3p) | 0.00417 | 0.26843   |
| 143 | C | 24 | py | Val( 2p) | 1.23633 | -0.19464  |
| 144 | C | 24 | py | Ryd( 3p) | 0.00268 | 0.28121   |
| 145 | C | 24 | pz | Val( 2p) | 1.24212 | -0.19560  |
| 146 | C | 24 | pz | Ryd( 3p) | 0.00273 | 0.32972   |
| 147 | H | 25 | S  | Val( 1S) | 0.78528 | 0.11765   |
| 148 | H | 25 | S  | Ryd( 2S) | 0.00164 | 1.02729   |
| 149 | H | 26 | S  | Val( 1S) | 0.78838 | 0.10460   |
| 150 | H | 26 | S  | Ryd( 2S) | 0.00122 | 0.95665   |
| 151 | H | 27 | S  | Val( 1S) | 0.79309 | 0.09182   |
| 152 | H | 27 | S  | Ryd( 2S) | 0.00141 | 1.02298   |
| 153 | C | 28 | S  | Cor( 1S) | 1.99887 | -11.28162 |
| 154 | C | 28 | S  | Val( 2S) | 0.84282 | -0.22953  |
| 155 | C | 28 | S  | Ryd( 3S) | 0.00213 | 1.25351   |
| 156 | C | 28 | px | Val( 2p) | 1.03844 | -0.21037  |
| 157 | C | 28 | px | Ryd( 3p) | 0.00821 | 0.58847   |
| 158 | C | 28 | py | Val( 2p) | 1.00248 | -0.15896  |
| 159 | C | 28 | py | Ryd( 3p) | 0.00740 | 0.70382   |
| 160 | C | 28 | pz | Val( 2p) | 0.95165 | -0.15270  |
| 161 | C | 28 | pz | Ryd( 3p) | 0.01203 | 0.71391   |
| 162 | C | 29 | S  | Cor( 1S) | 1.99909 | -11.24637 |
| 163 | C | 29 | S  | Val( 2S) | 0.89525 | -0.25036  |
| 164 | C | 29 | S  | Ryd( 3S) | 0.00166 | 1.32968   |
| 165 | C | 29 | px | Val( 2p) | 0.98873 | -0.17977  |
| 166 | C | 29 | px | Ryd( 3p) | 0.00867 | 0.61704   |
| 167 | C | 29 | py | Val( 2p) | 1.04083 | -0.15566  |
| 168 | C | 29 | py | Ryd( 3p) | 0.00723 | 0.66828   |
| 169 | C | 29 | pz | Val( 2p) | 1.04026 | -0.16926  |

|     |   |    |    |          |         |           |
|-----|---|----|----|----------|---------|-----------|
| 170 | C | 29 | pz | Ryd( 3p) | 0.00961 | 0.71487   |
| 171 | C | 30 | S  | Cor( 1S) | 1.99902 | -11.18389 |
| 172 | C | 30 | S  | Val( 2S) | 0.89533 | -0.14333  |
| 173 | C | 30 | S  | Ryd( 3S) | 0.00082 | 1.17866   |
| 174 | C | 30 | px | Val( 2p) | 1.01966 | -0.15725  |
| 175 | C | 30 | px | Ryd( 3p) | 0.00358 | 0.48237   |
| 176 | C | 30 | py | Val( 2p) | 1.13809 | -0.05310  |
| 177 | C | 30 | py | Ryd( 3p) | 0.00844 | 0.38633   |
| 178 | C | 30 | pz | Val( 2p) | 1.06352 | -0.15371  |
| 179 | C | 30 | pz | Ryd( 3p) | 0.00401 | 0.60754   |
| 180 | C | 31 | S  | Cor( 1S) | 1.99930 | -11.21043 |
| 181 | C | 31 | S  | Val( 2S) | 0.93314 | -0.21601  |
| 182 | C | 31 | S  | Ryd( 3S) | 0.00092 | 1.09451   |
| 183 | C | 31 | px | Val( 2p) | 1.00363 | -0.17061  |
| 184 | C | 31 | px | Ryd( 3p) | 0.00445 | 0.43618   |
| 185 | C | 31 | py | Val( 2p) | 1.07636 | -0.12849  |
| 186 | C | 31 | py | Ryd( 3p) | 0.00569 | 0.45170   |
| 187 | C | 31 | pz | Val( 2p) | 1.11755 | -0.07846  |
| 188 | C | 31 | pz | Ryd( 3p) | 0.00613 | 0.47506   |
| 189 | C | 32 | S  | Cor( 1S) | 1.99915 | -11.19673 |
| 190 | C | 32 | S  | Val( 2S) | 0.91255 | -0.16364  |
| 191 | C | 32 | S  | Ryd( 3S) | 0.00067 | 1.09116   |
| 192 | C | 32 | px | Val( 2p) | 1.01505 | -0.15677  |
| 193 | C | 32 | px | Ryd( 3p) | 0.00597 | 0.41362   |
| 194 | C | 32 | py | Val( 2p) | 1.05668 | -0.12009  |
| 195 | C | 32 | py | Ryd( 3p) | 0.00459 | 0.49367   |
| 196 | C | 32 | pz | Val( 2p) | 1.08833 | -0.06421  |
| 197 | C | 32 | pz | Ryd( 3p) | 0.00686 | 0.41796   |
| 198 | C | 33 | S  | Cor( 1S) | 1.99918 | -11.21233 |
| 199 | C | 33 | S  | Val( 2S) | 0.92214 | -0.22080  |
| 200 | C | 33 | S  | Ryd( 3S) | 0.00108 | 1.22010   |
| 201 | C | 33 | px | Val( 2p) | 1.03973 | -0.20267  |
| 202 | C | 33 | px | Ryd( 3p) | 0.00596 | 0.48339   |
| 203 | C | 33 | py | Val( 2p) | 1.15018 | -0.08704  |
| 204 | C | 33 | py | Ryd( 3p) | 0.00758 | 0.65136   |
| 205 | C | 33 | pz | Val( 2p) | 1.06724 | -0.18083  |
| 206 | C | 33 | pz | Ryd( 3p) | 0.00603 | 0.60472   |
| 207 | C | 34 | S  | Cor( 1S) | 1.99922 | -11.21822 |
| 208 | C | 34 | S  | Val( 2S) | 0.94685 | -0.27348  |
| 209 | C | 34 | S  | Ryd( 3S) | 0.00058 | 1.60318   |
| 210 | C | 34 | px | Val( 2p) | 1.00594 | -0.15481  |
| 211 | C | 34 | px | Ryd( 3p) | 0.00377 | 0.48577   |
| 212 | C | 34 | py | Val( 2p) | 1.08159 | -0.14814  |
| 213 | C | 34 | py | Ryd( 3p) | 0.00895 | 0.63338   |
| 214 | C | 34 | pz | Val( 2p) | 1.08489 | -0.12302  |
| 215 | C | 34 | pz | Ryd( 3p) | 0.00665 | 0.42957   |
| 216 | C | 35 | S  | Cor( 1S) | 1.99931 | -11.13756 |
| 217 | C | 35 | S  | Val( 2S) | 1.01098 | -0.22442  |
| 218 | C | 35 | S  | Ryd( 3S) | 0.00059 | 1.23917   |
| 219 | C | 35 | px | Val( 2p) | 1.20587 | -0.12728  |
| 220 | C | 35 | px | Ryd( 3p) | 0.00357 | 0.32649   |
| 221 | C | 35 | py | Val( 2p) | 1.08910 | -0.13169  |
| 222 | C | 35 | py | Ryd( 3p) | 0.00312 | 0.31026   |
| 223 | C | 35 | pz | Val( 2p) | 1.19755 | -0.12897  |
| 224 | C | 35 | pz | Ryd( 3p) | 0.00315 | 0.30823   |

|     |   |    |    |          |         |           |
|-----|---|----|----|----------|---------|-----------|
| 225 | H | 36 | S  | Val( 1S) | 0.82602 | 0.12908   |
| 226 | H | 36 | S  | Ryd( 2S) | 0.00159 | 0.97989   |
| 227 | H | 37 | S  | Val( 1S) | 0.81581 | 0.14498   |
| 228 | H | 37 | S  | Ryd( 2S) | 0.00133 | 0.95319   |
| 229 | H | 38 | S  | Val( 1S) | 0.81484 | 0.14803   |
| 230 | H | 38 | S  | Ryd( 2S) | 0.00140 | 0.94508   |
| 231 | C | 39 | S  | Cor( 1S) | 1.99933 | -11.15296 |
| 232 | C | 39 | S  | Val( 2S) | 1.00867 | -0.23427  |
| 233 | C | 39 | S  | Ryd( 3S) | 0.00076 | 1.24935   |
| 234 | C | 39 | px | Val( 2p) | 1.08397 | -0.15863  |
| 235 | C | 39 | px | Ryd( 3p) | 0.00496 | 0.53590   |
| 236 | C | 39 | py | Val( 2p) | 1.20378 | -0.13693  |
| 237 | C | 39 | py | Ryd( 3p) | 0.00374 | 0.36585   |
| 238 | C | 39 | pz | Val( 2p) | 1.21023 | -0.14001  |
| 239 | C | 39 | pz | Ryd( 3p) | 0.00295 | 0.46601   |
| 240 | H | 40 | S  | Val( 1S) | 0.83655 | 0.10713   |
| 241 | H | 40 | S  | Ryd( 2S) | 0.00170 | 1.10801   |
| 242 | H | 41 | S  | Val( 1S) | 0.81644 | 0.13023   |
| 243 | H | 41 | S  | Ryd( 2S) | 0.00148 | 0.98739   |
| 244 | H | 42 | S  | Val( 1S) | 0.82081 | 0.12650   |
| 245 | H | 42 | S  | Ryd( 2S) | 0.00161 | 1.00927   |
| 246 | C | 43 | S  | Cor( 1S) | 1.99909 | -11.35547 |
| 247 | C | 43 | S  | Val( 2S) | 0.86016 | -0.30019  |
| 248 | C | 43 | S  | Ryd( 3S) | 0.00600 | 1.14807   |
| 249 | C | 43 | px | Val( 2p) | 0.74324 | -0.19945  |
| 250 | C | 43 | px | Ryd( 3p) | 0.00859 | 0.52761   |
| 251 | C | 43 | py | Val( 2p) | 0.98410 | -0.20557  |
| 252 | C | 43 | py | Ryd( 3p) | 0.00755 | 0.67900   |
| 253 | C | 43 | pz | Val( 2p) | 0.87663 | -0.12188  |
| 254 | C | 43 | pz | Ryd( 3p) | 0.00848 | 0.59986   |
| 255 | C | 44 | S  | Cor( 1S) | 1.99921 | -11.19041 |
| 256 | C | 44 | S  | Val( 2S) | 1.02112 | -0.29796  |
| 257 | C | 44 | S  | Ryd( 3S) | 0.00051 | 1.28171   |
| 258 | C | 44 | px | Val( 2p) | 1.22623 | -0.19376  |
| 259 | C | 44 | px | Ryd( 3p) | 0.00179 | 0.34341   |
| 260 | C | 44 | py | Val( 2p) | 1.14573 | -0.20379  |
| 261 | C | 44 | py | Ryd( 3p) | 0.00426 | 0.30051   |
| 262 | C | 44 | pz | Val( 2p) | 1.18567 | -0.20297  |
| 263 | C | 44 | pz | Ryd( 3p) | 0.00312 | 0.25621   |
| 264 | H | 45 | S  | Val( 1S) | 0.78619 | 0.11333   |
| 265 | H | 45 | S  | Ryd( 2S) | 0.00161 | 1.01208   |
| 266 | H | 46 | S  | Val( 1S) | 0.79046 | 0.10100   |
| 267 | H | 46 | S  | Ryd( 2S) | 0.00114 | 0.95458   |
| 268 | H | 47 | S  | Val( 1S) | 0.79155 | 0.09297   |
| 269 | H | 47 | S  | Ryd( 2S) | 0.00122 | 0.98862   |
| 270 | C | 48 | S  | Cor( 1S) | 1.99888 | -11.29133 |
| 271 | C | 48 | S  | Val( 2S) | 0.84005 | -0.23402  |
| 272 | C | 48 | S  | Ryd( 3S) | 0.00221 | 1.27263   |
| 273 | C | 48 | px | Val( 2p) | 1.07657 | -0.19916  |
| 274 | C | 48 | px | Ryd( 3p) | 0.00627 | 0.60824   |

|     |   |    |    |          |         |           |
|-----|---|----|----|----------|---------|-----------|
| 275 | C | 48 | py | Val( 2p) | 0.89827 | -0.13605  |
| 276 | C | 48 | py | Ryd( 3p) | 0.00816 | 0.66725   |
| 277 | C | 48 | pz | Val( 2p) | 1.00999 | -0.19723  |
| 278 | C | 48 | pz | Ryd( 3p) | 0.01303 | 0.75660   |
| 279 | C | 49 | S  | Cor( 1S) | 1.99907 | -11.24745 |
| 280 | C | 49 | S  | Val( 2S) | 0.89313 | -0.25013  |
| 281 | C | 49 | S  | Ryd( 3S) | 0.00171 | 1.32706   |
| 282 | C | 49 | px | Val( 2p) | 1.04443 | -0.17918  |
| 283 | C | 49 | px | Ryd( 3p) | 0.00929 | 0.77333   |
| 284 | C | 49 | py | Val( 2p) | 1.04011 | -0.17592  |
| 285 | C | 49 | py | Ryd( 3p) | 0.00771 | 0.62753   |
| 286 | C | 49 | pz | Val( 2p) | 1.01875 | -0.17475  |
| 287 | C | 49 | pz | Ryd( 3p) | 0.00801 | 0.61591   |
| 288 | C | 50 | S  | Cor( 1S) | 1.99918 | -11.21129 |
| 289 | C | 50 | S  | Val( 2S) | 0.93155 | -0.22962  |
| 290 | C | 50 | S  | Ryd( 3S) | 0.00095 | 1.18040   |
| 291 | C | 50 | px | Val( 2p) | 1.08404 | -0.14323  |
| 292 | C | 50 | px | Ryd( 3p) | 0.00532 | 0.51336   |
| 293 | C | 50 | py | Val( 2p) | 1.04000 | -0.15714  |
| 294 | C | 50 | py | Ryd( 3p) | 0.00481 | 0.49488   |
| 295 | C | 50 | pz | Val( 2p) | 1.08180 | -0.13480  |
| 296 | C | 50 | pz | Ryd( 3p) | 0.00644 | 0.42841   |
| 297 | C | 51 | S  | Cor( 1S) | 1.99924 | -11.20373 |
| 298 | C | 51 | S  | Val( 2S) | 0.92674 | -0.20259  |
| 299 | C | 51 | S  | Ryd( 3S) | 0.00073 | 1.07607   |
| 300 | C | 51 | px | Val( 2p) | 1.03213 | -0.15114  |
| 301 | C | 51 | px | Ryd( 3p) | 0.00441 | 0.46321   |
| 302 | C | 51 | py | Val( 2p) | 1.08880 | -0.11276  |
| 303 | C | 51 | py | Ryd( 3p) | 0.00677 | 0.39913   |
| 304 | C | 51 | pz | Val( 2p) | 1.06578 | -0.11621  |
| 305 | C | 51 | pz | Ryd( 3p) | 0.00537 | 0.42501   |
| 306 | C | 52 | S  | Cor( 1S) | 1.99931 | -11.22261 |
| 307 | C | 52 | S  | Val( 2S) | 0.93789 | -0.23607  |
| 308 | C | 52 | S  | Ryd( 3S) | 0.00080 | 1.09222   |
| 309 | C | 52 | px | Val( 2p) | 1.10719 | -0.12363  |
| 310 | C | 52 | px | Ryd( 3p) | 0.00753 | 0.56947   |
| 311 | C | 52 | py | Val( 2p) | 1.06525 | -0.13207  |
| 312 | C | 52 | py | Ryd( 3p) | 0.00572 | 0.44094   |
| 313 | C | 52 | pz | Val( 2p) | 1.02510 | -0.16868  |
| 314 | C | 52 | pz | Ryd( 3p) | 0.00495 | 0.45743   |
| 315 | C | 53 | S  | Cor( 1S) | 1.99917 | -11.22051 |
| 316 | C | 53 | S  | Val( 2S) | 0.92171 | -0.22801  |
| 317 | C | 53 | S  | Ryd( 3S) | 0.00119 | 1.22741   |
| 318 | C | 53 | px | Val( 2p) | 1.10495 | -0.14244  |
| 319 | C | 53 | px | Ryd( 3p) | 0.00781 | 0.55883   |
| 320 | C | 53 | py | Val( 2p) | 1.05827 | -0.19058  |
| 321 | C | 53 | py | Ryd( 3p) | 0.00536 | 0.55804   |
| 322 | C | 53 | pz | Val( 2p) | 1.09553 | -0.15512  |
| 323 | C | 53 | pz | Ryd( 3p) | 0.00615 | 0.54939   |
| 324 | C | 54 | S  | Cor( 1S) | 1.99926 | -11.22233 |
| 325 | C | 54 | S  | Val( 2S) | 0.95163 | -0.28527  |
| 326 | C | 54 | S  | Ryd( 3S) | 0.00053 | 1.62833   |
| 327 | C | 54 | px | Val( 2p) | 1.01768 | -0.15426  |
| 328 | C | 54 | px | Ryd( 3p) | 0.00480 | 0.53404   |
| 329 | C | 54 | py | Val( 2p) | 1.12147 | -0.12629  |
| 330 | C | 54 | py | Ryd( 3p) | 0.00780 | 0.45924   |

|     |   |    |    |          |         |           |
|-----|---|----|----|----------|---------|-----------|
| 331 | C | 54 | pz | Val( 2p) | 1.02786 | -0.15897  |
| 332 | C | 54 | pz | Ryd( 3p) | 0.00615 | 0.61665   |
| 333 | C | 55 | S  | Cor( 1S) | 1.99931 | -11.14166 |
| 334 | C | 55 | S  | Val( 2S) | 1.00925 | -0.22704  |
| 335 | C | 55 | S  | Ryd( 3S) | 0.00071 | 1.26559   |
| 336 | C | 55 | px | Val( 2p) | 1.14386 | -0.13778  |
| 337 | C | 55 | px | Ryd( 3p) | 0.00375 | 0.32307   |
| 338 | C | 55 | py | Val( 2p) | 1.21456 | -0.13406  |
| 339 | C | 55 | py | Ryd( 3p) | 0.00254 | 0.34287   |
| 340 | C | 55 | pz | Val( 2p) | 1.13381 | -0.13154  |
| 341 | C | 55 | pz | Ryd( 3p) | 0.00380 | 0.34172   |
| 342 | H | 56 | S  | Val( 1S) | 0.81336 | 0.14778   |
| 343 | H | 56 | S  | Ryd( 2S) | 0.00168 | 0.96431   |
| 344 | H | 57 | S  | Val( 1S) | 0.81524 | 0.14048   |
| 345 | H | 57 | S  | Ryd( 2S) | 0.00138 | 0.94484   |
| 346 | H | 58 | S  | Val( 1S) | 0.83798 | 0.11261   |
| 347 | H | 58 | S  | Ryd( 2S) | 0.00199 | 1.09642   |
| 348 | C | 59 | S  | Cor( 1S) | 1.99932 | -11.14035 |
| 349 | C | 59 | S  | Val( 2S) | 1.01030 | -0.22745  |
| 350 | C | 59 | S  | Ryd( 3S) | 0.00062 | 1.25896   |
| 351 | C | 59 | px | Val( 2p) | 1.19358 | -0.12950  |
| 352 | C | 59 | px | Ryd( 3p) | 0.00370 | 0.34019   |
| 353 | C | 59 | py | Val( 2p) | 1.22378 | -0.12999  |
| 354 | C | 59 | py | Ryd( 3p) | 0.00266 | 0.32920   |
| 355 | C | 59 | pz | Val( 2p) | 1.08689 | -0.13840  |
| 356 | C | 59 | pz | Ryd( 3p) | 0.00364 | 0.31959   |
| 357 | H | 60 | S  | Val( 1S) | 0.82474 | 0.12813   |
| 358 | H | 60 | S  | Ryd( 2S) | 0.00151 | 1.00355   |
| 359 | H | 61 | S  | Val( 1S) | 0.81045 | 0.14938   |
| 360 | H | 61 | S  | Ryd( 2S) | 0.00124 | 0.98023   |
| 361 | H | 62 | S  | Val( 1S) | 0.81770 | 0.13986   |
| 362 | H | 62 | S  | Ryd( 2S) | 0.00177 | 0.94219   |
| 363 | H | 63 | S  | Val( 1S) | 0.81638 | 0.16565   |
| 364 | H | 63 | S  | Ryd( 2S) | 0.00161 | 1.09128   |
| 365 | H | 64 | S  | Val( 1S) | 0.82582 | 0.18861   |
| 366 | H | 64 | S  | Ryd( 2S) | 0.00184 | 1.03693   |
| 367 | H | 65 | S  | Val( 1S) | 0.91394 | 0.31883   |
| 368 | H | 65 | S  | Ryd( 2S) | 0.00253 | 0.94337   |
| 369 | H | 66 | S  | Val( 1S) | 0.82798 | 0.16987   |
| 370 | H | 66 | S  | Ryd( 2S) | 0.00223 | 1.13794   |
| 371 | H | 67 | S  | Val( 1S) | 0.84958 | 0.19413   |
| 372 | H | 67 | S  | Ryd( 2S) | 0.00349 | 1.04760   |
| 373 | H | 68 | S  | Val( 1S) | 0.86108 | 0.26314   |
| 374 | H | 68 | S  | Ryd( 2S) | 0.00244 | 1.02363   |
| 375 | H | 69 | S  | Val( 1S) | 0.81684 | 0.20103   |
| 376 | H | 69 | S  | Ryd( 2S) | 0.00185 | 1.00919   |

|     |    |    |    |          |         |           |
|-----|----|----|----|----------|---------|-----------|
| 377 | H  | 70 | S  | Val( 1S) | 0.87358 | 0.26751   |
| 378 | H  | 70 | S  | Ryd( 2S) | 0.00166 | 0.95212   |
| 379 | H  | 71 | S  | Val( 1S) | 0.84246 | 0.18418   |
| 380 | H  | 71 | S  | Ryd( 2S) | 0.00196 | 1.17034   |
| 381 | H  | 72 | S  | Val( 1S) | 0.82959 | 0.15266   |
| 382 | H  | 72 | S  | Ryd( 2S) | 0.00297 | 1.04587   |
| 383 | H  | 73 | S  | Val( 1S) | 0.82115 | 0.18636   |
| 384 | H  | 73 | S  | Ryd( 2S) | 0.00177 | 1.03754   |
| 385 | H  | 74 | S  | Val( 1S) | 0.83755 | 0.23446   |
| 386 | H  | 74 | S  | Ryd( 2S) | 0.00193 | 0.97402   |
| 387 | H  | 75 | S  | Val( 1S) | 0.82226 | 0.17974   |
| 388 | H  | 75 | S  | Ryd( 2S) | 0.00167 | 1.03300   |
| 389 | H  | 76 | S  | Val( 1S) | 0.83390 | 0.18064   |
| 390 | H  | 76 | S  | Ryd( 2S) | 0.00185 | 1.10447   |
| 391 | H  | 77 | S  | Val( 1S) | 0.83288 | 0.11470   |
| 392 | H  | 77 | S  | Ryd( 2S) | 0.00288 | 1.13127   |
| 393 | N  | 78 | S  | Cor( 1S) | 1.99942 | -15.54873 |
| 394 | N  | 78 | S  | Val( 2S) | 1.35763 | -0.82856  |
| 395 | N  | 78 | S  | Ryd( 3S) | 0.00224 | 1.87193   |
| 396 | N  | 78 | px | Val( 2p) | 1.27956 | -0.41181  |
| 397 | N  | 78 | px | Ryd( 3p) | 0.00618 | 1.05621   |
| 398 | N  | 78 | py | Val( 2p) | 1.39925 | -0.43528  |
| 399 | N  | 78 | py | Ryd( 3p) | 0.00648 | 0.86972   |
| 400 | N  | 78 | pz | Val( 2p) | 1.60873 | -0.51914  |
| 401 | N  | 78 | pz | Ryd( 3p) | 0.01133 | 0.83397   |
| 402 | N  | 79 | S  | Cor( 1S) | 1.99943 | -15.54541 |
| 403 | N  | 79 | S  | Val( 2S) | 1.36584 | -0.83321  |
| 404 | N  | 79 | S  | Ryd( 3S) | 0.00235 | 1.87886   |
| 405 | N  | 79 | px | Val( 2p) | 1.71077 | -0.55281  |
| 406 | N  | 79 | px | Ryd( 3p) | 0.01103 | 0.81731   |
| 407 | N  | 79 | py | Val( 2p) | 1.30273 | -0.40644  |
| 408 | N  | 79 | py | Ryd( 3p) | 0.00815 | 1.01902   |
| 409 | N  | 79 | pz | Val( 2p) | 1.29188 | -0.40687  |
| 410 | N  | 79 | pz | Ryd( 3p) | 0.00462 | 0.94962   |
| 411 | N  | 80 | S  | Cor( 1S) | 1.99940 | -15.54890 |
| 412 | N  | 80 | S  | Val( 2S) | 1.35513 | -0.83043  |
| 413 | N  | 80 | S  | Ryd( 3S) | 0.00248 | 1.86850   |
| 414 | N  | 80 | px | Val( 2p) | 1.31360 | -0.41128  |
| 415 | N  | 80 | px | Ryd( 3p) | 0.00635 | 0.90966   |
| 416 | N  | 80 | py | Val( 2p) | 1.58469 | -0.49613  |
| 417 | N  | 80 | py | Ryd( 3p) | 0.01192 | 1.03300   |
| 418 | N  | 80 | pz | Val( 2p) | 1.41789 | -0.47985  |
| 419 | N  | 80 | pz | Ryd( 3p) | 0.00703 | 0.86495   |
| 420 | Tl | 81 | S  | Val( 6S) | 1.86031 | -0.50950  |
| 421 | Tl | 81 | S  | Ryd( 7S) | 0.00026 | 10.43803  |
| 422 | Tl | 81 | px | Val( 6p) | 0.14815 | 0.29681   |
| 423 | Tl | 81 | px | Ryd( 7p) | 0.00689 | 0.74371   |
| 424 | Tl | 81 | py | Val( 6p) | 0.04989 | 0.08526   |
| 425 | Tl | 81 | py | Ryd( 7p) | 0.00252 | 0.39611   |
| 426 | Tl | 81 | pz | Val( 6p) | 0.07609 | 0.14829   |
| 427 | Tl | 81 | pz | Ryd( 7p) | 0.00571 | 0.53874   |



|     |    |    |       |          |         |           |
|-----|----|----|-------|----------|---------|-----------|
| 428 | Tl | 81 | dxy   | Cor( 5d) | 1.99543 | -0.98571  |
| 429 | Tl | 81 | dxy   | Ryd( 6d) | 0.00005 | 1.79162   |
| 430 | Tl | 81 | dxz   | Cor( 5d) | 1.99594 | -0.98407  |
| 431 | Tl | 81 | dxz   | Ryd( 6d) | 0.00005 | 1.78469   |
| 432 | Tl | 81 | dyz   | Cor( 5d) | 1.99760 | -0.98521  |
| 433 | Tl | 81 | dyz   | Ryd( 6d) | 0.00004 | 1.73441   |
| 434 | Tl | 81 | dx2y2 | Cor( 5d) | 1.99727 | -0.98780  |
| 435 | Tl | 81 | dx2y2 | Ryd( 6d) | 0.00003 | 1.67956   |
| 436 | Tl | 81 | dz2   | Cor( 5d) | 1.99654 | -0.98333  |
| 437 | Tl | 81 | dz2   | Ryd( 6d) | 0.00007 | 1.80301   |
| 438 | Tl | 82 | S     | Val( 6S) | 1.86039 | -0.50954  |
| 439 | Tl | 82 | S     | Ryd( 7S) | 0.00026 | 10.43798  |
| 440 | Tl | 82 | px    | Val( 6p) | 0.14816 | 0.29684   |
| 441 | Tl | 82 | px    | Ryd( 7p) | 0.00688 | 0.74394   |
| 442 | Tl | 82 | py    | Val( 6p) | 0.04989 | 0.08527   |
| 443 | Tl | 82 | py    | Ryd( 7p) | 0.00252 | 0.39612   |
| 444 | Tl | 82 | pz    | Val( 6p) | 0.07610 | 0.14835   |
| 445 | Tl | 82 | pz    | Ryd( 7p) | 0.00571 | 0.53868   |
| 446 | Tl | 82 | dxy   | Cor( 5d) | 1.99543 | -0.98573  |
| 447 | Tl | 82 | dxy   | Ryd( 6d) | 0.00005 | 1.79162   |
| 448 | Tl | 82 | dxz   | Cor( 5d) | 1.99594 | -0.98408  |
| 449 | Tl | 82 | dxz   | Ryd( 6d) | 0.00005 | 1.78463   |
| 450 | Tl | 82 | dyz   | Cor( 5d) | 1.99760 | -0.98523  |
| 451 | Tl | 82 | dyz   | Ryd( 6d) | 0.00004 | 1.73438   |
| 452 | Tl | 82 | dx2y2 | Cor( 5d) | 1.99727 | -0.98781  |
| 453 | Tl | 82 | dx2y2 | Ryd( 6d) | 0.00003 | 1.67961   |
| 454 | Tl | 82 | dz2   | Cor( 5d) | 1.99654 | -0.98335  |
| 455 | Tl | 82 | dz2   | Ryd( 6d) | 0.00007 | 1.80303   |
| 456 | C  | 83 | S     | Cor( 1S) | 1.99883 | -11.29468 |
| 457 | C  | 83 | S     | Val( 2S) | 0.84034 | -0.23916  |
| 458 | C  | 83 | S     | Ryd( 3S) | 0.00213 | 1.28231   |
| 459 | C  | 83 | px    | Val( 2p) | 0.88768 | -0.13748  |
| 460 | C  | 83 | px    | Ryd( 3p) | 0.01529 | 0.77123   |
| 461 | C  | 83 | py    | Val( 2p) | 1.06946 | -0.19181  |
| 462 | C  | 83 | py    | Ryd( 3p) | 0.00611 | 0.60529   |
| 463 | C  | 83 | pz    | Val( 2p) | 1.02356 | -0.22609  |
| 464 | C  | 83 | pz    | Ryd( 3p) | 0.00968 | 0.53457   |
| 465 | C  | 84 | S     | Cor( 1S) | 1.99901 | -11.25583 |
| 466 | C  | 84 | S     | Val( 2S) | 0.89397 | -0.26245  |
| 467 | C  | 84 | S     | Ryd( 3S) | 0.00201 | 1.34441   |
| 468 | C  | 84 | px    | Val( 2p) | 1.05922 | -0.17505  |
| 469 | C  | 84 | px    | Ryd( 3p) | 0.00813 | 0.66533   |
| 470 | C  | 84 | py    | Val( 2p) | 1.06614 | -0.18630  |
| 471 | C  | 84 | py    | Ryd( 3p) | 0.01043 | 0.78452   |
| 472 | C  | 84 | pz    | Val( 2p) | 0.97812 | -0.19727  |
| 473 | C  | 84 | pz    | Ryd( 3p) | 0.00815 | 0.59847   |
| 474 | C  | 85 | S     | Cor( 1S) | 1.99917 | -11.22972 |
| 475 | C  | 85 | S     | Val( 2S) | 0.93607 | -0.25865  |
| 476 | C  | 85 | S     | Ryd( 3S) | 0.00123 | 1.23445   |
| 477 | C  | 85 | px    | Val( 2p) | 1.10500 | -0.14087  |
| 478 | C  | 85 | px    | Ryd( 3p) | 0.00767 | 0.53039   |
| 479 | C  | 85 | py    | Val( 2p) | 1.10607 | -0.14225  |
| 480 | C  | 85 | py    | Ryd( 3p) | 0.00542 | 0.61848   |
| 481 | C  | 85 | pz    | Val( 2p) | 0.99662 | -0.20455  |
| 482 | C  | 85 | pz    | Ryd( 3p) | 0.00473 | 0.44022   |
| 483 | C  | 86 | S     | Cor( 1S) | 1.99927 | -11.22861 |
| 484 | C  | 86 | S     | Val( 2S) | 0.93766 | -0.24597  |

|     |   |    |    |          |         |           |
|-----|---|----|----|----------|---------|-----------|
| 485 | C | 86 | S  | Ryd( 3S) | 0.00139 | 1.15275   |
| 486 | C | 86 | px | Val( 2p) | 1.15098 | -0.07984  |
| 487 | C | 86 | px | Ryd( 3p) | 0.00767 | 0.56616   |
| 488 | C | 86 | py | Val( 2p) | 1.04559 | -0.15529  |
| 489 | C | 86 | py | Ryd( 3p) | 0.00513 | 0.49903   |
| 490 | C | 86 | pz | Val( 2p) | 1.00133 | -0.20523  |
| 491 | C | 86 | pz | Ryd( 3p) | 0.00544 | 0.45231   |
| 492 | C | 87 | S  | Cor( 1S) | 1.99869 | -11.18196 |
| 493 | C | 87 | S  | Val( 2S) | 0.87488 | -0.08380  |
| 494 | C | 87 | S  | Ryd( 3S) | 0.00097 | 1.16683   |
| 495 | C | 87 | px | Val( 2p) | 1.05696 | -0.14693  |
| 496 | C | 87 | px | Ryd( 3p) | 0.00547 | 0.58273   |
| 497 | C | 87 | py | Val( 2p) | 1.11289 | 0.02654   |
| 498 | C | 87 | py | Ryd( 3p) | 0.00799 | 0.45816   |
| 499 | C | 87 | pz | Val( 2p) | 0.99084 | -0.19831  |
| 500 | C | 87 | pz | Ryd( 3p) | 0.00621 | 0.50800   |
| 501 | C | 88 | S  | Cor( 1S) | 1.99915 | -11.22921 |
| 502 | C | 88 | S  | Val( 2S) | 0.92837 | -0.24422  |
| 503 | C | 88 | S  | Ryd( 3S) | 0.00129 | 1.29694   |
| 504 | C | 88 | px | Val( 2p) | 1.09602 | -0.14643  |
| 505 | C | 88 | px | Ryd( 3p) | 0.00593 | 0.64185   |
| 506 | C | 88 | py | Val( 2p) | 1.09938 | -0.14626  |
| 507 | C | 88 | py | Ryd( 3p) | 0.00857 | 0.51636   |
| 508 | C | 88 | pz | Val( 2p) | 1.04269 | -0.21038  |
| 509 | C | 88 | pz | Ryd( 3p) | 0.00534 | 0.54306   |
| 510 | C | 89 | S  | Cor( 1S) | 1.99893 | -11.27202 |
| 511 | C | 89 | S  | Val( 2S) | 0.96185 | -0.36717  |
| 512 | C | 89 | S  | Ryd( 3S) | 0.00101 | 1.58842   |
| 513 | C | 89 | px | Val( 2p) | 1.11642 | -0.24406  |
| 514 | C | 89 | px | Ryd( 3p) | 0.01289 | 0.55418   |
| 515 | C | 89 | py | Val( 2p) | 1.07403 | -0.26174  |
| 516 | C | 89 | py | Ryd( 3p) | 0.00747 | 0.50413   |
| 517 | C | 89 | pz | Val( 2p) | 1.14282 | -0.23530  |
| 518 | C | 89 | pz | Ryd( 3p) | 0.01641 | 0.57556   |
| 519 | H | 90 | S  | Val( 1S) | 0.79125 | 0.08655   |
| 520 | H | 90 | S  | Ryd( 2S) | 0.00188 | 1.10619   |
| 521 | C | 91 | S  | Cor( 1S) | 1.99910 | -11.35455 |
| 522 | C | 91 | S  | Val( 2S) | 0.86065 | -0.29960  |
| 523 | C | 91 | S  | Ryd( 3S) | 0.00589 | 1.14423   |
| 524 | C | 91 | px | Val( 2p) | 0.90879 | -0.15275  |
| 525 | C | 91 | px | Ryd( 3p) | 0.00783 | 0.63511   |
| 526 | C | 91 | py | Val( 2p) | 0.79640 | -0.19449  |
| 527 | C | 91 | py | Ryd( 3p) | 0.00876 | 0.53820   |
| 528 | C | 91 | pz | Val( 2p) | 0.90615 | -0.17730  |
| 529 | C | 91 | pz | Ryd( 3p) | 0.00770 | 0.58503   |
| 530 | C | 92 | S  | Cor( 1S) | 1.99921 | -11.19006 |
| 531 | C | 92 | S  | Val( 2S) | 1.02181 | -0.29809  |
| 532 | C | 92 | S  | Ryd( 3S) | 0.00048 | 1.27597   |
| 533 | C | 92 | px | Val( 2p) | 1.24802 | -0.19928  |
| 534 | C | 92 | px | Ryd( 3p) | 0.00333 | 0.28255   |
| 535 | C | 92 | py | Val( 2p) | 1.19169 | -0.19683  |
| 536 | C | 92 | py | Ryd( 3p) | 0.00229 | 0.30523   |
| 537 | C | 92 | pz | Val( 2p) | 1.11562 | -0.20189  |
| 538 | C | 92 | pz | Ryd( 3p) | 0.00359 | 0.28427   |
| 539 | H | 93 | S  | Val( 1S) | 0.78904 | 0.11101   |

|     |   |     |    |          |         |           |
|-----|---|-----|----|----------|---------|-----------|
| 540 | H | 93  | S  | Ryd( 2S) | 0.00177 | 1.02048   |
| 541 | H | 94  | S  | Val( 1S) | 0.78975 | 0.09822   |
| 542 | H | 94  | S  | Ryd( 2S) | 0.00118 | 0.94872   |
| 543 | H | 95  | S  | Val( 1S) | 0.79136 | 0.09422   |
| 544 | H | 95  | S  | Ryd( 2S) | 0.00118 | 0.95616   |
| 545 | C | 96  | S  | Cor( 1S) | 1.99908 | -11.20329 |
| 546 | C | 96  | S  | Val( 2S) | 0.92052 | -0.22450  |
| 547 | C | 96  | S  | Ryd( 3S) | 0.00056 | 1.61743   |
| 548 | C | 96  | px | Val( 2p) | 1.12566 | -0.10567  |
| 549 | C | 96  | px | Ryd( 3p) | 0.01018 | 0.50347   |
| 550 | C | 96  | py | Val( 2p) | 1.00654 | -0.14877  |
| 551 | C | 96  | py | Ryd( 3p) | 0.00534 | 0.50629   |
| 552 | C | 96  | pz | Val( 2p) | 1.04388 | -0.14624  |
| 553 | C | 96  | pz | Ryd( 3p) | 0.00423 | 0.57119   |
| 554 | C | 97  | S  | Cor( 1S) | 1.99932 | -11.14324 |
| 555 | C | 97  | S  | Val( 2S) | 1.00935 | -0.22840  |
| 556 | C | 97  | S  | Ryd( 3S) | 0.00068 | 1.25086   |
| 557 | C | 97  | px | Val( 2p) | 1.21739 | -0.13490  |
| 558 | C | 97  | px | Ryd( 3p) | 0.00289 | 0.28575   |
| 559 | C | 97  | py | Val( 2p) | 1.21078 | -0.13156  |
| 560 | C | 97  | py | Ryd( 3p) | 0.00357 | 0.32908   |
| 561 | C | 97  | pz | Val( 2p) | 1.06673 | -0.14265  |
| 562 | C | 97  | pz | Ryd( 3p) | 0.00339 | 0.31561   |
| 563 | H | 98  | S  | Val( 1S) | 0.81865 | 0.13182   |
| 564 | H | 98  | S  | Ryd( 2S) | 0.00159 | 0.95202   |
| 565 | H | 99  | S  | Val( 1S) | 0.81555 | 0.13876   |
| 566 | H | 99  | S  | Ryd( 2S) | 0.00132 | 0.94424   |
| 567 | H | 100 | S  | Val( 1S) | 0.82526 | 0.12570   |
| 568 | H | 100 | S  | Ryd( 2S) | 0.00153 | 0.98777   |
| 569 | C | 101 | S  | Cor( 1S) | 1.99936 | -11.14319 |
| 570 | C | 101 | S  | Val( 2S) | 1.00207 | -0.21988  |
| 571 | C | 101 | S  | Ryd( 3S) | 0.00064 | 1.29054   |
| 572 | C | 101 | px | Val( 2p) | 1.17457 | -0.14100  |
| 573 | C | 101 | px | Ryd( 3p) | 0.00288 | 0.44386   |
| 574 | C | 101 | py | Val( 2p) | 1.14685 | -0.14379  |
| 575 | C | 101 | py | Ryd( 3p) | 0.00406 | 0.42544   |
| 576 | C | 101 | pz | Val( 2p) | 1.17738 | -0.13475  |
| 577 | C | 101 | pz | Ryd( 3p) | 0.00401 | 0.40590   |
| 578 | H | 102 | S  | Val( 1S) | 0.83185 | 0.11561   |
| 579 | H | 102 | S  | Ryd( 2S) | 0.00163 | 1.13193   |
| 580 | H | 103 | S  | Val( 1S) | 0.81428 | 0.13908   |
| 581 | H | 103 | S  | Ryd( 2S) | 0.00131 | 1.00349   |
| 582 | H | 104 | S  | Val( 1S) | 0.82369 | 0.12207   |
| 583 | H | 104 | S  | Ryd( 2S) | 0.00200 | 1.07621   |
| 584 | C | 105 | S  | Cor( 1S) | 1.99910 | -11.35397 |
| 585 | C | 105 | S  | Val( 2S) | 0.86193 | -0.30149  |
| 586 | C | 105 | S  | Ryd( 3S) | 0.00598 | 1.17885   |
| 587 | C | 105 | px | Val( 2p) | 0.94892 | -0.16277  |
| 588 | C | 105 | px | Ryd( 3p) | 0.00761 | 0.61342   |
| 589 | C | 105 | py | Val( 2p) | 0.83481 | -0.18182  |

|     |   |     |    |          |         |           |
|-----|---|-----|----|----------|---------|-----------|
| 590 | C | 105 | py | Ryd( 3p) | 0.00985 | 0.56421   |
| 591 | C | 105 | pz | Val( 2p) | 0.82168 | -0.17726  |
| 592 | C | 105 | pz | Ryd( 3p) | 0.00735 | 0.56770   |
| 593 | C | 106 | S  | Cor( 1S) | 1.99921 | -11.18582 |
| 594 | C | 106 | S  | Val( 2S) | 1.01962 | -0.29308  |
| 595 | C | 106 | S  | Ryd( 3S) | 0.00052 | 1.30329   |
| 596 | C | 106 | px | Val( 2p) | 1.08186 | -0.20365  |
| 597 | C | 106 | px | Ryd( 3p) | 0.00417 | 0.26828   |
| 598 | C | 106 | py | Val( 2p) | 1.23632 | -0.19512  |
| 599 | C | 106 | py | Ryd( 3p) | 0.00269 | 0.28123   |
| 600 | C | 106 | pz | Val( 2p) | 1.24214 | -0.19561  |
| 601 | C | 106 | pz | Ryd( 3p) | 0.00273 | 0.32962   |
| 602 | H | 107 | S  | Val( 1S) | 0.78517 | 0.11761   |
| 603 | H | 107 | S  | Ryd( 2S) | 0.00164 | 1.02730   |
| 604 | H | 108 | S  | Val( 1S) | 0.78830 | 0.10473   |
| 605 | H | 108 | S  | Ryd( 2S) | 0.00122 | 0.95662   |
| 606 | H | 109 | S  | Val( 1S) | 0.79279 | 0.09048   |
| 607 | H | 109 | S  | Ryd( 2S) | 0.00141 | 1.02411   |
| 608 | C | 110 | S  | Cor( 1S) | 1.99887 | -11.28149 |
| 609 | C | 110 | S  | Val( 2S) | 0.84263 | -0.22916  |
| 610 | C | 110 | S  | Ryd( 3S) | 0.00213 | 1.25351   |
| 611 | C | 110 | px | Val( 2p) | 1.03840 | -0.21033  |
| 612 | C | 110 | px | Ryd( 3p) | 0.00821 | 0.58846   |
| 613 | C | 110 | py | Val( 2p) | 1.00279 | -0.15896  |
| 614 | C | 110 | py | Ryd( 3p) | 0.00739 | 0.70363   |
| 615 | C | 110 | pz | Val( 2p) | 0.95167 | -0.15270  |
| 616 | C | 110 | pz | Ryd( 3p) | 0.01203 | 0.71385   |
| 617 | C | 111 | S  | Cor( 1S) | 1.99908 | -11.24616 |
| 618 | C | 111 | S  | Val( 2S) | 0.89514 | -0.25003  |
| 619 | C | 111 | S  | Ryd( 3S) | 0.00167 | 1.32999   |
| 620 | C | 111 | px | Val( 2p) | 0.98888 | -0.17974  |
| 621 | C | 111 | px | Ryd( 3p) | 0.00868 | 0.61727   |
| 622 | C | 111 | py | Val( 2p) | 1.04115 | -0.15562  |
| 623 | C | 111 | py | Ryd( 3p) | 0.00723 | 0.66809   |
| 624 | C | 111 | pz | Val( 2p) | 1.04033 | -0.16924  |
| 625 | C | 111 | pz | Ryd( 3p) | 0.00962 | 0.71511   |
| 626 | C | 112 | S  | Cor( 1S) | 1.99902 | -11.18373 |
| 627 | C | 112 | S  | Val( 2S) | 0.89516 | -0.14274  |
| 628 | C | 112 | S  | Ryd( 3S) | 0.00081 | 1.17885   |
| 629 | C | 112 | px | Val( 2p) | 1.01954 | -0.15701  |
| 630 | C | 112 | px | Ryd( 3p) | 0.00358 | 0.48234   |
| 631 | C | 112 | py | Val( 2p) | 1.13783 | -0.05264  |
| 632 | C | 112 | py | Ryd( 3p) | 0.00844 | 0.38605   |
| 633 | C | 112 | pz | Val( 2p) | 1.06339 | -0.15366  |
| 634 | C | 112 | pz | Ryd( 3p) | 0.00402 | 0.60764   |
| 635 | C | 113 | S  | Cor( 1S) | 1.99930 | -11.21030 |
| 636 | C | 113 | S  | Val( 2S) | 0.93307 | -0.21585  |
| 637 | C | 113 | S  | Ryd( 3S) | 0.00092 | 1.09449   |
| 638 | C | 113 | px | Val( 2p) | 1.00370 | -0.17062  |
| 639 | C | 113 | px | Ryd( 3p) | 0.00445 | 0.43604   |
| 640 | C | 113 | py | Val( 2p) | 1.07645 | -0.12845  |
| 641 | C | 113 | py | Ryd( 3p) | 0.00569 | 0.45157   |
| 642 | C | 113 | pz | Val( 2p) | 1.11755 | -0.07845  |
| 643 | C | 113 | pz | Ryd( 3p) | 0.00613 | 0.47490   |

|     |   |     |    |          |         |           |
|-----|---|-----|----|----------|---------|-----------|
| 644 | C | 114 | S  | Cor( 1S) | 1.99915 | -11.19675 |
| 645 | C | 114 | S  | Val( 2S) | 0.91269 | -0.16405  |
| 646 | C | 114 | S  | Ryd( 3S) | 0.00067 | 1.09091   |
| 647 | C | 114 | px | Val( 2p) | 1.01510 | -0.15671  |
| 648 | C | 114 | px | Ryd( 3p) | 0.00596 | 0.41394   |
| 649 | C | 114 | py | Val( 2p) | 1.05685 | -0.12015  |
| 650 | C | 114 | py | Ryd( 3p) | 0.00459 | 0.49401   |
| 651 | C | 114 | pz | Val( 2p) | 1.08854 | -0.06471  |
| 652 | C | 114 | pz | Ryd( 3p) | 0.00686 | 0.41810   |
| 653 | C | 115 | S  | Cor( 1S) | 1.99918 | -11.21239 |
| 654 | C | 115 | S  | Val( 2S) | 0.92220 | -0.22089  |
| 655 | C | 115 | S  | Ryd( 3S) | 0.00108 | 1.22015   |
| 656 | C | 115 | px | Val( 2p) | 1.03967 | -0.20264  |
| 657 | C | 115 | px | Ryd( 3p) | 0.00597 | 0.48330   |
| 658 | C | 115 | py | Val( 2p) | 1.15010 | -0.08697  |
| 659 | C | 115 | py | Ryd( 3p) | 0.00757 | 0.65134   |
| 660 | C | 115 | pz | Val( 2p) | 1.06702 | -0.18070  |
| 661 | C | 115 | pz | Ryd( 3p) | 0.00604 | 0.60482   |
| 662 | C | 116 | S  | Cor( 1S) | 1.99922 | -11.21823 |
| 663 | C | 116 | S  | Val( 2S) | 0.94693 | -0.27350  |
| 664 | C | 116 | S  | Ryd( 3S) | 0.00058 | 1.60309   |
| 665 | C | 116 | px | Val( 2p) | 1.00581 | -0.15472  |
| 666 | C | 116 | px | Ryd( 3p) | 0.00377 | 0.48577   |
| 667 | C | 116 | py | Val( 2p) | 1.08150 | -0.14803  |
| 668 | C | 116 | py | Ryd( 3p) | 0.00895 | 0.63346   |
| 669 | C | 116 | pz | Val( 2p) | 1.08471 | -0.12287  |
| 670 | C | 116 | pz | Ryd( 3p) | 0.00665 | 0.42958   |
| 671 | C | 117 | S  | Cor( 1S) | 1.99931 | -11.13742 |
| 672 | C | 117 | S  | Val( 2S) | 1.01089 | -0.22419  |
| 673 | C | 117 | S  | Ryd( 3S) | 0.00059 | 1.23901   |
| 674 | C | 117 | px | Val( 2p) | 1.20583 | -0.12711  |
| 675 | C | 117 | px | Ryd( 3p) | 0.00357 | 0.32647   |
| 676 | C | 117 | py | Val( 2p) | 1.08912 | -0.13173  |
| 677 | C | 117 | py | Ryd( 3p) | 0.00312 | 0.31038   |
| 678 | C | 117 | pz | Val( 2p) | 1.19754 | -0.12883  |
| 679 | C | 117 | pz | Ryd( 3p) | 0.00314 | 0.30817   |
| 680 | H | 118 | S  | Val( 1S) | 0.82608 | 0.12912   |
| 681 | H | 118 | S  | Ryd( 2S) | 0.00159 | 0.97998   |
| 682 | H | 119 | S  | Val( 1S) | 0.81581 | 0.14495   |
| 683 | H | 119 | S  | Ryd( 2S) | 0.00133 | 0.95332   |
| 684 | H | 120 | S  | Val( 1S) | 0.81492 | 0.14837   |
| 685 | H | 120 | S  | Ryd( 2S) | 0.00141 | 0.94496   |
| 686 | C | 121 | S  | Cor( 1S) | 1.99933 | -11.15289 |
| 687 | C | 121 | S  | Val( 2S) | 1.00867 | -0.23423  |
| 688 | C | 121 | S  | Ryd( 3S) | 0.00076 | 1.24944   |
| 689 | C | 121 | px | Val( 2p) | 1.08409 | -0.15863  |
| 690 | C | 121 | px | Ryd( 3p) | 0.00496 | 0.53596   |
| 691 | C | 121 | py | Val( 2p) | 1.20376 | -0.13688  |
| 692 | C | 121 | py | Ryd( 3p) | 0.00374 | 0.36587   |
| 693 | C | 121 | pz | Val( 2p) | 1.21021 | -0.13996  |
| 694 | C | 121 | pz | Ryd( 3p) | 0.00295 | 0.46597   |
| 695 | H | 122 | S  | Val( 1S) | 0.83655 | 0.10716   |
| 696 | H | 122 | S  | Ryd( 2S) | 0.00170 | 1.10802   |

|     |   |     |    |          |         |           |
|-----|---|-----|----|----------|---------|-----------|
| 697 | H | 123 | S  | Val( 1S) | 0.81645 | 0.13028   |
| 698 | H | 123 | S  | Ryd( 2S) | 0.00148 | 0.98744   |
| 699 | H | 124 | S  | Val( 1S) | 0.82084 | 0.12649   |
| 700 | H | 124 | S  | Ryd( 2S) | 0.00161 | 1.00931   |
| 701 | C | 125 | S  | Cor( 1S) | 1.99909 | -11.35531 |
| 702 | C | 125 | S  | Val( 2S) | 0.85993 | -0.29986  |
| 703 | C | 125 | S  | Ryd( 3S) | 0.00600 | 1.14817   |
| 704 | C | 125 | px | Val( 2p) | 0.74326 | -0.19940  |
| 705 | C | 125 | px | Ryd( 3p) | 0.00859 | 0.52768   |
| 706 | C | 125 | py | Val( 2p) | 0.98437 | -0.20561  |
| 707 | C | 125 | py | Ryd( 3p) | 0.00754 | 0.67895   |
| 708 | C | 125 | pz | Val( 2p) | 0.87677 | -0.12190  |
| 709 | C | 125 | pz | Ryd( 3p) | 0.00847 | 0.59996   |
| 710 | C | 126 | S  | Cor( 1S) | 1.99921 | -11.19050 |
| 711 | C | 126 | S  | Val( 2S) | 1.02120 | -0.29815  |
| 712 | C | 126 | S  | Ryd( 3S) | 0.00051 | 1.28191   |
| 713 | C | 126 | px | Val( 2p) | 1.22624 | -0.19391  |
| 714 | C | 126 | px | Ryd( 3p) | 0.00180 | 0.34355   |
| 715 | C | 126 | py | Val( 2p) | 1.14572 | -0.20374  |
| 716 | C | 126 | py | Ryd( 3p) | 0.00426 | 0.30048   |
| 717 | C | 126 | pz | Val( 2p) | 1.18569 | -0.20299  |
| 718 | C | 126 | pz | Ryd( 3p) | 0.00312 | 0.25620   |
| 719 | H | 127 | S  | Val( 1S) | 0.78621 | 0.11337   |
| 720 | H | 127 | S  | Ryd( 2S) | 0.00161 | 1.01202   |
| 721 | H | 128 | S  | Val( 1S) | 0.79044 | 0.10108   |
| 722 | H | 128 | S  | Ryd( 2S) | 0.00114 | 0.95450   |
| 723 | H | 129 | S  | Val( 1S) | 0.79143 | 0.09249   |
| 724 | H | 129 | S  | Ryd( 2S) | 0.00122 | 0.98891   |
| 725 | C | 130 | S  | Cor( 1S) | 1.99888 | -11.29111 |
| 726 | C | 130 | S  | Val( 2S) | 0.83986 | -0.23365  |
| 727 | C | 130 | S  | Ryd( 3S) | 0.00221 | 1.27262   |
| 728 | C | 130 | px | Val( 2p) | 1.07673 | -0.19922  |
| 729 | C | 130 | px | Ryd( 3p) | 0.00627 | 0.60824   |
| 730 | C | 130 | py | Val( 2p) | 0.89842 | -0.13606  |
| 731 | C | 130 | py | Ryd( 3p) | 0.00816 | 0.66729   |
| 732 | C | 130 | pz | Val( 2p) | 1.01022 | -0.19726  |
| 733 | C | 130 | pz | Ryd( 3p) | 0.01302 | 0.75667   |
| 734 | C | 131 | S  | Cor( 1S) | 1.99907 | -11.24747 |
| 735 | C | 131 | S  | Val( 2S) | 0.89318 | -0.25020  |
| 736 | C | 131 | S  | Ryd( 3S) | 0.00171 | 1.32752   |
| 737 | C | 131 | px | Val( 2p) | 1.04439 | -0.17915  |
| 738 | C | 131 | px | Ryd( 3p) | 0.00930 | 0.77326   |
| 739 | C | 131 | py | Val( 2p) | 1.04001 | -0.17593  |
| 740 | C | 131 | py | Ryd( 3p) | 0.00772 | 0.62793   |
| 741 | C | 131 | pz | Val( 2p) | 1.01873 | -0.17473  |
| 742 | C | 131 | pz | Ryd( 3p) | 0.00801 | 0.61589   |
| 743 | C | 132 | S  | Cor( 1S) | 1.99918 | -11.21134 |
| 744 | C | 132 | S  | Val( 2S) | 0.93155 | -0.22969  |
| 745 | C | 132 | S  | Ryd( 3S) | 0.00095 | 1.18026   |
| 746 | C | 132 | px | Val( 2p) | 1.08425 | -0.14314  |
| 747 | C | 132 | px | Ryd( 3p) | 0.00531 | 0.51344   |
| 748 | C | 132 | py | Val( 2p) | 1.03979 | -0.15705  |

|     |   |     |    |          |         |           |
|-----|---|-----|----|----------|---------|-----------|
| 749 | C | 132 | py | Ryd( 3p) | 0.00482 | 0.49495   |
| 750 | C | 132 | pz | Val( 2p) | 1.08166 | -0.13502  |
| 751 | C | 132 | pz | Ryd( 3p) | 0.00645 | 0.42831   |
| 752 | C | 133 | S  | Cor( 1S) | 1.99924 | -11.20339 |
| 753 | C | 133 | S  | Val( 2S) | 0.92643 | -0.20196  |
| 754 | C | 133 | S  | Ryd( 3S) | 0.00073 | 1.07605   |
| 755 | C | 133 | px | Val( 2p) | 1.03246 | -0.15120  |
| 756 | C | 133 | px | Ryd( 3p) | 0.00441 | 0.46319   |
| 757 | C | 133 | py | Val( 2p) | 1.08900 | -0.11273  |
| 758 | C | 133 | py | Ryd( 3p) | 0.00676 | 0.39878   |
| 759 | C | 133 | pz | Val( 2p) | 1.06585 | -0.11615  |
| 760 | C | 133 | pz | Ryd( 3p) | 0.00537 | 0.42497   |
| 761 | C | 134 | S  | Cor( 1S) | 1.99931 | -11.22262 |
| 762 | C | 134 | S  | Val( 2S) | 0.93790 | -0.23607  |
| 763 | C | 134 | S  | Ryd( 3S) | 0.00080 | 1.09229   |
| 764 | C | 134 | px | Val( 2p) | 1.10707 | -0.12358  |
| 765 | C | 134 | px | Ryd( 3p) | 0.00753 | 0.56952   |
| 766 | C | 134 | py | Val( 2p) | 1.06520 | -0.13205  |
| 767 | C | 134 | py | Ryd( 3p) | 0.00573 | 0.44097   |
| 768 | C | 134 | pz | Val( 2p) | 1.02500 | -0.16863  |
| 769 | C | 134 | pz | Ryd( 3p) | 0.00495 | 0.45747   |
| 770 | C | 135 | S  | Cor( 1S) | 1.99917 | -11.22050 |
| 771 | C | 135 | S  | Val( 2S) | 0.92170 | -0.22799  |
| 772 | C | 135 | S  | Ryd( 3S) | 0.00119 | 1.22757   |
| 773 | C | 135 | px | Val( 2p) | 1.10490 | -0.14239  |
| 774 | C | 135 | px | Ryd( 3p) | 0.00781 | 0.55885   |
| 775 | C | 135 | py | Val( 2p) | 1.05829 | -0.19057  |
| 776 | C | 135 | py | Ryd( 3p) | 0.00536 | 0.55803   |
| 777 | C | 135 | pz | Val( 2p) | 1.09554 | -0.15512  |
| 778 | C | 135 | pz | Ryd( 3p) | 0.00616 | 0.54943   |
| 779 | C | 136 | S  | Cor( 1S) | 1.99926 | -11.22230 |
| 780 | C | 136 | S  | Val( 2S) | 0.95162 | -0.28514  |
| 781 | C | 136 | S  | Ryd( 3S) | 0.00053 | 1.62843   |
| 782 | C | 136 | px | Val( 2p) | 1.01768 | -0.15429  |
| 783 | C | 136 | px | Ryd( 3p) | 0.00480 | 0.53403   |
| 784 | C | 136 | py | Val( 2p) | 1.12150 | -0.12603  |
| 785 | C | 136 | py | Ryd( 3p) | 0.00780 | 0.45924   |
| 786 | C | 136 | pz | Val( 2p) | 1.02783 | -0.15899  |
| 787 | C | 136 | pz | Ryd( 3p) | 0.00615 | 0.61696   |
| 788 | C | 137 | S  | Cor( 1S) | 1.99931 | -11.14179 |
| 789 | C | 137 | S  | Val( 2S) | 1.00940 | -0.22738  |
| 790 | C | 137 | S  | Ryd( 3S) | 0.00071 | 1.26574   |
| 791 | C | 137 | px | Val( 2p) | 1.14385 | -0.13775  |
| 792 | C | 137 | px | Ryd( 3p) | 0.00374 | 0.32298   |
| 793 | C | 137 | py | Val( 2p) | 1.21458 | -0.13447  |
| 794 | C | 137 | py | Ryd( 3p) | 0.00254 | 0.34312   |
| 795 | C | 137 | pz | Val( 2p) | 1.13381 | -0.13140  |
| 796 | C | 137 | pz | Ryd( 3p) | 0.00381 | 0.34193   |
| 797 | H | 138 | S  | Val( 1S) | 0.81327 | 0.14732   |
| 798 | H | 138 | S  | Ryd( 2S) | 0.00168 | 0.96454   |
| 799 | H | 139 | S  | Val( 1S) | 0.81514 | 0.13989   |
| 800 | H | 139 | S  | Ryd( 2S) | 0.00137 | 0.94512   |
| 801 | H | 140 | S  | Val( 1S) | 0.83804 | 0.11309   |
| 802 | H | 140 | S  | Ryd( 2S) | 0.00200 | 1.09620   |

|     |   |     |    |          |         |           |
|-----|---|-----|----|----------|---------|-----------|
| 803 | C | 141 | S  | Cor( 1S) | 1.99931 | -11.14032 |
| 804 | C | 141 | S  | Val( 2S) | 1.01028 | -0.22726  |
| 805 | C | 141 | S  | Ryd( 3S) | 0.00062 | 1.25882   |
| 806 | C | 141 | px | Val( 2p) | 1.19351 | -0.12944  |
| 807 | C | 141 | px | Ryd( 3p) | 0.00370 | 0.34021   |
| 808 | C | 141 | py | Val( 2p) | 1.22378 | -0.12977  |
| 809 | C | 141 | py | Ryd( 3p) | 0.00266 | 0.32923   |
| 810 | C | 141 | pz | Val( 2p) | 1.08679 | -0.13839  |
| 811 | C | 141 | pz | Ryd( 3p) | 0.00364 | 0.31967   |
| 812 | H | 142 | S  | Val( 1S) | 0.82478 | 0.12808   |
| 813 | H | 142 | S  | Ryd( 2S) | 0.00151 | 1.00358   |
| 814 | H | 143 | S  | Val( 1S) | 0.81056 | 0.14990   |
| 815 | H | 143 | S  | Ryd( 2S) | 0.00124 | 0.97989   |
| 816 | H | 144 | S  | Val( 1S) | 0.81772 | 0.13987   |
| 817 | H | 144 | S  | Ryd( 2S) | 0.00177 | 0.94216   |
| 818 | H | 145 | S  | Val( 1S) | 0.81640 | 0.16564   |
| 819 | H | 145 | S  | Ryd( 2S) | 0.00161 | 1.09128   |
| 820 | H | 146 | S  | Val( 1S) | 0.82583 | 0.18862   |
| 821 | H | 146 | S  | Ryd( 2S) | 0.00184 | 1.03696   |
| 822 | H | 147 | S  | Val( 1S) | 0.91394 | 0.31887   |
| 823 | H | 147 | S  | Ryd( 2S) | 0.00253 | 0.94340   |
| 824 | H | 148 | S  | Val( 1S) | 0.82797 | 0.16991   |
| 825 | H | 148 | S  | Ryd( 2S) | 0.00223 | 1.13799   |
| 826 | H | 149 | S  | Val( 1S) | 0.84971 | 0.19415   |
| 827 | H | 149 | S  | Ryd( 2S) | 0.00348 | 1.04746   |
| 828 | H | 150 | S  | Val( 1S) | 0.86148 | 0.26369   |
| 829 | H | 150 | S  | Ryd( 2S) | 0.00244 | 1.02296   |
| 830 | H | 151 | S  | Val( 1S) | 0.81683 | 0.20100   |
| 831 | H | 151 | S  | Ryd( 2S) | 0.00185 | 1.00930   |
| 832 | H | 152 | S  | Val( 1S) | 0.87314 | 0.26710   |
| 833 | H | 152 | S  | Ryd( 2S) | 0.00167 | 0.95303   |
| 834 | H | 153 | S  | Val( 1S) | 0.84252 | 0.18418   |
| 835 | H | 153 | S  | Ryd( 2S) | 0.00196 | 1.17020   |
| 836 | H | 154 | S  | Val( 1S) | 0.82968 | 0.15270   |
| 837 | H | 154 | S  | Ryd( 2S) | 0.00297 | 1.04581   |
| 838 | H | 155 | S  | Val( 1S) | 0.82101 | 0.18600   |
| 839 | H | 155 | S  | Ryd( 2S) | 0.00177 | 1.03790   |
| 840 | H | 156 | S  | Val( 1S) | 0.83755 | 0.23471   |
| 841 | H | 156 | S  | Ryd( 2S) | 0.00193 | 0.97432   |
| 842 | H | 157 | S  | Val( 1S) | 0.82229 | 0.17970   |
| 843 | H | 157 | S  | Ryd( 2S) | 0.00166 | 1.03297   |
| 844 | H | 158 | S  | Val( 1S) | 0.83391 | 0.18066   |
| 845 | H | 158 | S  | Ryd( 2S) | 0.00185 | 1.10447   |



|     |   |     |    |          |         |           |
|-----|---|-----|----|----------|---------|-----------|
| 846 | H | 159 | S  | Val( 1S) | 0.83294 | 0.11519   |
| 847 | H | 159 | S  | Ryd( 2S) | 0.00288 | 1.13083   |
| 848 | N | 160 | S  | Cor( 1S) | 1.99942 | -15.54851 |
| 849 | N | 160 | S  | Val( 2S) | 1.35721 | -0.82817  |
| 850 | N | 160 | S  | Ryd( 3S) | 0.00225 | 1.87186   |
| 851 | N | 160 | px | Val( 2p) | 1.27968 | -0.41187  |
| 852 | N | 160 | px | Ryd( 3p) | 0.00618 | 1.05618   |
| 853 | N | 160 | py | Val( 2p) | 1.39898 | -0.43518  |
| 854 | N | 160 | py | Ryd( 3p) | 0.00648 | 0.86973   |
| 855 | N | 160 | pz | Val( 2p) | 1.60890 | -0.51920  |
| 856 | N | 160 | pz | Ryd( 3p) | 0.01135 | 0.83387   |
| 857 | N | 161 | S  | Cor( 1S) | 1.99943 | -15.54535 |
| 858 | N | 161 | S  | Val( 2S) | 1.36558 | -0.83292  |
| 859 | N | 161 | S  | Ryd( 3S) | 0.00235 | 1.87891   |
| 860 | N | 161 | px | Val( 2p) | 1.71081 | -0.55270  |
| 861 | N | 161 | px | Ryd( 3p) | 0.01103 | 0.81737   |
| 862 | N | 161 | py | Val( 2p) | 1.30279 | -0.40637  |
| 863 | N | 161 | py | Ryd( 3p) | 0.00815 | 1.01922   |
| 864 | N | 161 | pz | Val( 2p) | 1.29177 | -0.40673  |
| 865 | N | 161 | pz | Ryd( 3p) | 0.00462 | 0.94985   |
| 866 | N | 162 | S  | Cor( 1S) | 1.99940 | -15.54887 |
| 867 | N | 162 | S  | Val( 2S) | 1.35514 | -0.83035  |
| 868 | N | 162 | S  | Ryd( 3S) | 0.00248 | 1.86869   |
| 869 | N | 162 | px | Val( 2p) | 1.31359 | -0.41126  |
| 870 | N | 162 | px | Ryd( 3p) | 0.00635 | 0.90977   |
| 871 | N | 162 | py | Val( 2p) | 1.58465 | -0.49606  |
| 872 | N | 162 | py | Ryd( 3p) | 0.01192 | 1.03311   |
| 873 | N | 162 | pz | Val( 2p) | 1.41781 | -0.47975  |
| 874 | N | 162 | pz | Ryd( 3p) | 0.00703 | 0.86500   |

[136 electrons found in the effective core potential]

WARNING: 1 low occupancy (<1.9990e) core orbital found on C 1

- 1 low occupancy (<1.9990e) core orbital found on C 8
- 1 low occupancy (<1.9990e) core orbital found on C 12
- 1 low occupancy (<1.9990e) core orbital found on C 28
- 1 low occupancy (<1.9990e) core orbital found on C 48
- 5 low occupancy (<1.9990e) core orbitals found on Tl 81
- 5 low occupancy (<1.9990e) core orbitals found on Tl 82
- 1 low occupancy (<1.9990e) core orbital found on C 83
- 1 low occupancy (<1.9990e) core orbital found on C 87
- 1 low occupancy (<1.9990e) core orbital found on C 89
- 1 low occupancy (<1.9990e) core orbital found on C 110
- 1 low occupancy (<1.9990e) core orbital found on C 130

Summary of Natural Population Analysis:

|      |    | Natural Population |         |         |         |         |
|------|----|--------------------|---------|---------|---------|---------|
| Atom | No | Charge             | Core    | Valence | Rydberg | Total   |
| C    | 1  | -0.33170           | 1.99893 | 4.29501 | 0.03776 | 6.33170 |
| H    | 2  | 0.20671            | 0.00000 | 0.79141 | 0.00188 | 0.79329 |
| C    | 3  | 0.49899            | 1.99910 | 3.47176 | 0.03016 | 5.50101 |
| C    | 4  | -0.58574           | 1.99921 | 4.57684 | 0.00969 | 6.58574 |
| H    | 5  | 0.20917            | 0.00000 | 0.78906 | 0.00177 | 0.79083 |
| H    | 6  | 0.20905            | 0.00000 | 0.78977 | 0.00118 | 0.79095 |
| H    | 7  | 0.20729            | 0.00000 | 0.79152 | 0.00119 | 0.79271 |

|   |    |          |         |         |         |         |
|---|----|----------|---------|---------|---------|---------|
| C | 8  | 0.14692  | 1.99883 | 3.82105 | 0.03320 | 5.85308 |
| C | 9  | -0.02507 | 1.99901 | 3.99733 | 0.02873 | 6.02507 |
| C | 10 | -0.16196 | 1.99917 | 4.14374 | 0.01905 | 6.16196 |
| C | 11 | -0.15445 | 1.99927 | 4.13555 | 0.01964 | 6.15445 |
| C | 12 | -0.05493 | 1.99869 | 4.03560 | 0.02065 | 6.05493 |
| C | 13 | -0.18677 | 1.99915 | 4.16649 | 0.02113 | 6.18677 |
| C | 14 | -0.11619 | 1.99908 | 4.09680 | 0.02031 | 6.11619 |
| C | 15 | -0.51416 | 1.99932 | 4.50431 | 0.01053 | 6.51416 |
| H | 16 | 0.17977  | 0.00000 | 0.81864 | 0.00159 | 0.82023 |
| H | 17 | 0.18313  | 0.00000 | 0.81555 | 0.00132 | 0.81687 |
| H | 18 | 0.17331  | 0.00000 | 0.82517 | 0.00153 | 0.82669 |
| C | 19 | -0.51206 | 1.99936 | 4.50111 | 0.01159 | 6.51206 |
| H | 20 | 0.16661  | 0.00000 | 0.83176 | 0.00163 | 0.83339 |
| H | 21 | 0.18439  | 0.00000 | 0.81431 | 0.00130 | 0.81561 |
| H | 22 | 0.17443  | 0.00000 | 0.82356 | 0.00200 | 0.82557 |
| C | 23 | 0.50268  | 1.99910 | 3.46742 | 0.03080 | 5.49732 |
| C | 24 | -0.58859 | 1.99921 | 4.57927 | 0.01010 | 6.58859 |
| H | 25 | 0.21308  | 0.00000 | 0.78528 | 0.00164 | 0.78692 |
| H | 26 | 0.21040  | 0.00000 | 0.78838 | 0.00122 | 0.78960 |
| H | 27 | 0.20550  | 0.00000 | 0.79309 | 0.00141 | 0.79450 |
| C | 28 | 0.13597  | 1.99887 | 3.83539 | 0.02977 | 5.86403 |
| C | 29 | 0.00865  | 1.99909 | 3.96508 | 0.02719 | 5.99135 |
| C | 30 | -0.13247 | 1.99902 | 4.11660 | 0.01685 | 6.13247 |
| C | 31 | -0.14719 | 1.99930 | 4.13069 | 0.01719 | 6.14719 |
| C | 32 | -0.08984 | 1.99915 | 4.07261 | 0.01809 | 6.08984 |
| C | 33 | -0.19912 | 1.99918 | 4.17929 | 0.02065 | 6.19912 |
| C | 34 | -0.13845 | 1.99922 | 4.11927 | 0.01996 | 6.13845 |
| C | 35 | -0.51323 | 1.99931 | 4.50350 | 0.01043 | 6.51323 |
| H | 36 | 0.17239  | 0.00000 | 0.82602 | 0.00159 | 0.82761 |
| H | 37 | 0.18286  | 0.00000 | 0.81581 | 0.00133 | 0.81714 |
| H | 38 | 0.18376  | 0.00000 | 0.81484 | 0.00140 | 0.81624 |
| C | 39 | -0.51840 | 1.99933 | 4.50665 | 0.01242 | 6.51840 |
| H | 40 | 0.16176  | 0.00000 | 0.83655 | 0.00170 | 0.83824 |
| H | 41 | 0.18208  | 0.00000 | 0.81644 | 0.00148 | 0.81792 |
| H | 42 | 0.17759  | 0.00000 | 0.82081 | 0.00161 | 0.82241 |
| C | 43 | 0.50615  | 1.99909 | 3.46414 | 0.03062 | 5.49385 |
| C | 44 | -0.58765 | 1.99921 | 4.57875 | 0.00969 | 6.58765 |
| H | 45 | 0.21220  | 0.00000 | 0.78619 | 0.00161 | 0.78780 |
| H | 46 | 0.20840  | 0.00000 | 0.79046 | 0.00114 | 0.79160 |
| H | 47 | 0.20723  | 0.00000 | 0.79155 | 0.00122 | 0.79277 |
| C | 48 | 0.14657  | 1.99888 | 3.82488 | 0.02968 | 5.85343 |
| C | 49 | -0.02221 | 1.99907 | 3.99642 | 0.02672 | 6.02221 |
| C | 50 | -0.15409 | 1.99918 | 4.13739 | 0.01752 | 6.15409 |
| C | 51 | -0.12997 | 1.99924 | 4.11345 | 0.01727 | 6.12997 |
| C | 52 | -0.15375 | 1.99931 | 4.13543 | 0.01901 | 6.15375 |
| C | 53 | -0.20014 | 1.99917 | 4.18046 | 0.02051 | 6.20014 |
| C | 54 | -0.13718 | 1.99926 | 4.11864 | 0.01928 | 6.13718 |
| C | 55 | -0.51158 | 1.99931 | 4.50148 | 0.01080 | 6.51158 |
| H | 56 | 0.18496  | 0.00000 | 0.81336 | 0.00168 | 0.81504 |
| H | 57 | 0.18339  | 0.00000 | 0.81524 | 0.00138 | 0.81661 |
| H | 58 | 0.16002  | 0.00000 | 0.83798 | 0.00199 | 0.83998 |
| C | 59 | -0.52448 | 1.99932 | 4.51455 | 0.01062 | 6.52448 |
| H | 60 | 0.17375  | 0.00000 | 0.82474 | 0.00151 | 0.82625 |
| H | 61 | 0.18831  | 0.00000 | 0.81045 | 0.00124 | 0.81169 |
| H | 62 | 0.18052  | 0.00000 | 0.81770 | 0.00177 | 0.81948 |
| H | 63 | 0.18201  | 0.00000 | 0.81638 | 0.00161 | 0.81799 |
| H | 64 | 0.17234  | 0.00000 | 0.82582 | 0.00184 | 0.82766 |
| H | 65 | 0.08353  | 0.00000 | 0.91394 | 0.00253 | 0.91647 |
| H | 66 | 0.16979  | 0.00000 | 0.82798 | 0.00223 | 0.83021 |
| H | 67 | 0.14693  | 0.00000 | 0.84958 | 0.00349 | 0.85307 |
| H | 68 | 0.13648  | 0.00000 | 0.86108 | 0.00244 | 0.86352 |
| H | 69 | 0.18131  | 0.00000 | 0.81684 | 0.00185 | 0.81869 |

|    |     |          |          |         |         |          |
|----|-----|----------|----------|---------|---------|----------|
| H  | 70  | 0.12476  | 0.00000  | 0.87358 | 0.00166 | 0.87524  |
| H  | 71  | 0.15557  | 0.00000  | 0.84246 | 0.00196 | 0.84443  |
| H  | 72  | 0.16745  | 0.00000  | 0.82959 | 0.00297 | 0.83255  |
| H  | 73  | 0.17708  | 0.00000  | 0.82115 | 0.00177 | 0.82292  |
| H  | 74  | 0.16053  | 0.00000  | 0.83755 | 0.00193 | 0.83947  |
| H  | 75  | 0.17607  | 0.00000  | 0.82226 | 0.00167 | 0.82393  |
| H  | 76  | 0.16426  | 0.00000  | 0.83390 | 0.00185 | 0.83574  |
| H  | 77  | 0.16424  | 0.00000  | 0.83288 | 0.00288 | 0.83576  |
| N  | 78  | -0.67081 | 1.99942  | 5.64517 | 0.02622 | 7.67081  |
| N  | 79  | -0.69679 | 1.99943  | 5.67122 | 0.02614 | 7.69679  |
| N  | 80  | -0.69850 | 1.99940  | 5.67131 | 0.02779 | 7.69850  |
| Tl | 81  | 0.86717  | 77.98277 | 2.13444 | 0.01562 | 80.13283 |
| Tl | 82  | 0.86705  | 77.98278 | 2.13455 | 0.01562 | 80.13295 |
| C  | 83  | 0.14694  | 1.99883  | 3.82104 | 0.03320 | 5.85306  |
| C  | 84  | -0.02517 | 1.99901  | 3.99745 | 0.02872 | 6.02517  |
| C  | 85  | -0.16197 | 1.99917  | 4.14376 | 0.01905 | 6.16197  |
| C  | 86  | -0.15446 | 1.99927  | 4.13555 | 0.01963 | 6.15446  |
| C  | 87  | -0.05491 | 1.99869  | 4.03557 | 0.02064 | 6.05491  |
| C  | 88  | -0.18673 | 1.99915  | 4.16646 | 0.02113 | 6.18673  |
| C  | 89  | -0.33183 | 1.99893  | 4.29512 | 0.03778 | 6.33183  |
| H  | 90  | 0.20688  | 0.00000  | 0.79125 | 0.00188 | 0.79312  |
| C  | 91  | 0.49873  | 1.99910  | 3.47198 | 0.03018 | 5.50127  |
| C  | 92  | -0.58605 | 1.99921  | 4.57714 | 0.00970 | 6.58605  |
| H  | 93  | 0.20919  | 0.00000  | 0.78904 | 0.00177 | 0.79081  |
| H  | 94  | 0.20907  | 0.00000  | 0.78975 | 0.00118 | 0.79093  |
| H  | 95  | 0.20746  | 0.00000  | 0.79136 | 0.00118 | 0.79254  |
| C  | 96  | -0.11599 | 1.99908  | 4.09660 | 0.02031 | 6.11599  |
| C  | 97  | -0.51410 | 1.99932  | 4.50425 | 0.01053 | 6.51410  |
| H  | 98  | 0.17977  | 0.00000  | 0.81865 | 0.00159 | 0.82023  |
| H  | 99  | 0.18312  | 0.00000  | 0.81555 | 0.00132 | 0.81688  |
| H  | 100 | 0.17321  | 0.00000  | 0.82526 | 0.00153 | 0.82679  |
| C  | 101 | -0.51181 | 1.99936  | 4.50087 | 0.01158 | 6.51181  |
| H  | 102 | 0.16652  | 0.00000  | 0.83185 | 0.00163 | 0.83348  |
| H  | 103 | 0.18441  | 0.00000  | 0.81428 | 0.00131 | 0.81559  |
| H  | 104 | 0.17431  | 0.00000  | 0.82369 | 0.00200 | 0.82569  |
| C  | 105 | 0.50277  | 1.99910  | 3.46734 | 0.03079 | 5.49723  |
| C  | 106 | -0.58926 | 1.99921  | 4.57994 | 0.01011 | 6.58926  |
| H  | 107 | 0.21319  | 0.00000  | 0.78517 | 0.00164 | 0.78681  |
| H  | 108 | 0.21048  | 0.00000  | 0.78830 | 0.00122 | 0.78952  |
| H  | 109 | 0.20580  | 0.00000  | 0.79279 | 0.00141 | 0.79420  |
| C  | 110 | 0.13588  | 1.99887  | 3.83549 | 0.02976 | 5.86412  |
| C  | 111 | 0.00820  | 1.99908  | 3.96550 | 0.02721 | 5.99180  |
| C  | 112 | -0.13178 | 1.99902  | 4.11591 | 0.01685 | 6.13178  |
| C  | 113 | -0.14726 | 1.99930  | 4.13077 | 0.01719 | 6.14726  |
| C  | 114 | -0.09041 | 1.99915  | 4.07318 | 0.01808 | 6.09041  |
| C  | 115 | -0.19882 | 1.99918  | 4.17899 | 0.02065 | 6.19882  |
| C  | 116 | -0.13812 | 1.99922  | 4.11895 | 0.01995 | 6.13812  |
| C  | 117 | -0.51311 | 1.99931  | 4.50338 | 0.01042 | 6.51311  |
| H  | 118 | 0.17233  | 0.00000  | 0.82608 | 0.00159 | 0.82767  |
| H  | 119 | 0.18286  | 0.00000  | 0.81581 | 0.00133 | 0.81714  |
| H  | 120 | 0.18367  | 0.00000  | 0.81492 | 0.00141 | 0.81633  |
| C  | 121 | -0.51849 | 1.99933  | 4.50674 | 0.01242 | 6.51849  |
| H  | 122 | 0.16175  | 0.00000  | 0.83655 | 0.00170 | 0.83825  |
| H  | 123 | 0.18207  | 0.00000  | 0.81645 | 0.00148 | 0.81793  |
| H  | 124 | 0.17755  | 0.00000  | 0.82084 | 0.00161 | 0.82245  |
| C  | 125 | 0.50598  | 1.99909  | 3.46433 | 0.03060 | 5.49402  |
| C  | 126 | -0.58774 | 1.99921  | 4.57884 | 0.00969 | 6.58774  |
| H  | 127 | 0.21218  | 0.00000  | 0.78621 | 0.00161 | 0.78782  |
| H  | 128 | 0.20842  | 0.00000  | 0.79044 | 0.00114 | 0.79158  |
| H  | 129 | 0.20735  | 0.00000  | 0.79143 | 0.00122 | 0.79265  |
| C  | 130 | 0.14623  | 1.99888  | 3.82523 | 0.02966 | 5.85377  |
| C  | 131 | -0.02211 | 1.99907  | 3.99631 | 0.02673 | 6.02211  |

|       |          |         |         |         |         |
|-------|----------|---------|---------|---------|---------|
| C 132 | -0.15395 | 1.99918 | 4.13725 | 0.01752 | 6.15395 |
| C 133 | -0.13025 | 1.99924 | 4.11375 | 0.01727 | 6.13025 |
| C 134 | -0.15348 | 1.99931 | 4.13516 | 0.01901 | 6.15348 |
| C 135 | -0.20012 | 1.99917 | 4.18044 | 0.02052 | 6.20012 |
| C 136 | -0.13718 | 1.99926 | 4.11863 | 0.01929 | 6.13718 |
| C 137 | -0.51175 | 1.99931 | 4.50164 | 0.01080 | 6.51175 |
| H 138 | 0.18505  | 0.00000 | 0.81327 | 0.00168 | 0.81495 |
| H 139 | 0.18349  | 0.00000 | 0.81514 | 0.00137 | 0.81651 |
| H 140 | 0.15996  | 0.00000 | 0.83804 | 0.00200 | 0.84004 |
| C 141 | -0.52429 | 1.99931 | 4.51436 | 0.01061 | 6.52429 |
| H 142 | 0.17372  | 0.00000 | 0.82478 | 0.00151 | 0.82628 |
| H 143 | 0.18820  | 0.00000 | 0.81056 | 0.00124 | 0.81180 |
| H 144 | 0.18052  | 0.00000 | 0.81772 | 0.00177 | 0.81948 |
| H 145 | 0.18199  | 0.00000 | 0.81640 | 0.00161 | 0.81801 |
| H 146 | 0.17233  | 0.00000 | 0.82583 | 0.00184 | 0.82767 |
| H 147 | 0.08353  | 0.00000 | 0.91394 | 0.00253 | 0.91647 |
| H 148 | 0.16980  | 0.00000 | 0.82797 | 0.00223 | 0.83020 |
| H 149 | 0.14681  | 0.00000 | 0.84971 | 0.00348 | 0.85319 |
| H 150 | 0.13608  | 0.00000 | 0.86148 | 0.00244 | 0.86392 |
| H 151 | 0.18132  | 0.00000 | 0.81683 | 0.00185 | 0.81868 |
| H 152 | 0.12520  | 0.00000 | 0.87314 | 0.00167 | 0.87480 |
| H 153 | 0.15552  | 0.00000 | 0.84252 | 0.00196 | 0.84448 |
| H 154 | 0.16735  | 0.00000 | 0.82968 | 0.00297 | 0.83265 |
| H 155 | 0.17722  | 0.00000 | 0.82101 | 0.00177 | 0.82278 |
| H 156 | 0.16052  | 0.00000 | 0.83755 | 0.00193 | 0.83948 |
| H 157 | 0.17605  | 0.00000 | 0.82229 | 0.00166 | 0.82395 |
| H 158 | 0.16424  | 0.00000 | 0.83391 | 0.00185 | 0.83576 |
| H 159 | 0.16418  | 0.00000 | 0.83294 | 0.00288 | 0.83582 |
| N 160 | -0.67044 | 1.99942 | 5.64477 | 0.02626 | 7.67044 |
| N 161 | -0.69654 | 1.99943 | 5.67096 | 0.02614 | 7.69654 |
| N 162 | -0.69839 | 1.99940 | 5.67120 | 0.02779 | 7.69839 |

=====  
 \* Total \* 2.00000 303.90385 390.37947 1.71668 696.00000

#### Natural Population

-----  
 Effective Core 136.00000  
 Core 167.90385 ( 99.9428% of 168)  
 Valence 390.37947 ( 99.5866% of 392)  
 Natural Minimal Basis 694.28332 ( 99.7534% of 696)  
 Natural Rydberg Basis 1.71668 ( 0.2466% of 696)  
 -----

#### Atom No Natural Electron Configuration

-----  
 C 1 [core]2S( 0.96)2p( 3.33)3p( 0.04)  
 H 2 1S( 0.79)  
 C 3 [core]2S( 0.86)2p( 2.61)3S( 0.01)3p( 0.02)  
 C 4 [core]2S( 1.02)2p( 3.56)3p( 0.01)  
 H 5 1S( 0.79)  
 H 6 1S( 0.79)  
 H 7 1S( 0.79)  
 C 8 [core]2S( 0.84)2p( 2.98)3p( 0.03)  
 C 9 [core]2S( 0.89)2p( 3.10)3p( 0.03)  
 C 10 [core]2S( 0.94)2p( 3.21)3p( 0.02)  
 C 11 [core]2S( 0.94)2p( 3.20)3p( 0.02)  
 C 12 [core]2S( 0.87)2p( 3.16)3p( 0.02)  
 C 13 [core]2S( 0.93)2p( 3.24)3p( 0.02)  
 C 14 [core]2S( 0.92)2p( 3.18)3p( 0.02)  
 C 15 [core]2S( 1.01)2p( 3.49)3p( 0.01)  
 H 16 1S( 0.82)  
 H 17 1S( 0.82)  
 -----

H 18 1S( 0.83)  
C 19 [core]2S( 1.00)2p( 3.50)3p( 0.01)  
H 20 1S( 0.83)  
H 21 1S( 0.81)  
H 22 1S( 0.82)  
C 23 [core]2S( 0.86)2p( 2.61)3S( 0.01)3p( 0.02)  
C 24 [core]2S( 1.02)2p( 3.56)3p( 0.01)  
H 25 1S( 0.79)  
H 26 1S( 0.79)  
H 27 1S( 0.79)  
C 28 [core]2S( 0.84)2p( 2.99)3p( 0.03)  
C 29 [core]2S( 0.90)2p( 3.07)3p( 0.03)  
C 30 [core]2S( 0.90)2p( 3.22)3p( 0.02)  
C 31 [core]2S( 0.93)2p( 3.20)3p( 0.02)  
C 32 [core]2S( 0.91)2p( 3.16)3p( 0.02)  
C 33 [core]2S( 0.92)2p( 3.26)3p( 0.02)  
C 34 [core]2S( 0.95)2p( 3.17)3p( 0.02)  
C 35 [core]2S( 1.01)2p( 3.49)3p( 0.01)  
H 36 1S( 0.83)  
H 37 1S( 0.82)  
H 38 1S( 0.81)  
C 39 [core]2S( 1.01)2p( 3.50)3p( 0.01)  
H 40 1S( 0.84)  
H 41 1S( 0.82)  
H 42 1S( 0.82)  
C 43 [core]2S( 0.86)2p( 2.60)3S( 0.01)3p( 0.02)  
C 44 [core]2S( 1.02)2p( 3.56)3p( 0.01)  
H 45 1S( 0.79)  
H 46 1S( 0.79)  
H 47 1S( 0.79)  
C 48 [core]2S( 0.84)2p( 2.98)3p( 0.03)  
C 49 [core]2S( 0.89)2p( 3.10)3p( 0.03)  
C 50 [core]2S( 0.93)2p( 3.21)3p( 0.02)  
C 51 [core]2S( 0.93)2p( 3.19)3p( 0.02)  
C 52 [core]2S( 0.94)2p( 3.20)3p( 0.02)  
C 53 [core]2S( 0.92)2p( 3.26)3p( 0.02)  
C 54 [core]2S( 0.95)2p( 3.17)3p( 0.02)  
C 55 [core]2S( 1.01)2p( 3.49)3p( 0.01)  
H 56 1S( 0.81)  
H 57 1S( 0.82)  
H 58 1S( 0.84)  
C 59 [core]2S( 1.01)2p( 3.50)3p( 0.01)  
H 60 1S( 0.82)  
H 61 1S( 0.81)  
H 62 1S( 0.82)  
H 63 1S( 0.82)  
H 64 1S( 0.83)  
H 65 1S( 0.91)  
H 66 1S( 0.83)  
H 67 1S( 0.85)  
H 68 1S( 0.86)  
H 69 1S( 0.82)  
H 70 1S( 0.87)  
H 71 1S( 0.84)  
H 72 1S( 0.83)  
H 73 1S( 0.82)  
H 74 1S( 0.84)  
H 75 1S( 0.82)  
H 76 1S( 0.83)  
H 77 1S( 0.83)  
N 78 [core]2S( 1.36)2p( 4.29)3p( 0.02)  
N 79 [core]2S( 1.37)2p( 4.31)3p( 0.02)

N 80 [core]2S( 1.36)2p( 4.32)3p( 0.03)  
Tl 81 [core]6S( 1.86)6p( 0.27)7p( 0.02)  
Tl 82 [core]6S( 1.86)6p( 0.27)7p( 0.02)  
C 83 [core]2S( 0.84)2p( 2.98)3p( 0.03)  
C 84 [core]2S( 0.89)2p( 3.10)3p( 0.03)  
C 85 [core]2S( 0.94)2p( 3.21)3p( 0.02)  
C 86 [core]2S( 0.94)2p( 3.20)3p( 0.02)  
C 87 [core]2S( 0.87)2p( 3.16)3p( 0.02)  
C 88 [core]2S( 0.93)2p( 3.24)3p( 0.02)  
C 89 [core]2S( 0.96)2p( 3.33)3p( 0.04)  
H 90 1S( 0.79)  
C 91 [core]2S( 0.86)2p( 2.61)3S( 0.01)3p( 0.02)  
C 92 [core]2S( 1.02)2p( 3.56)3p( 0.01)  
H 93 1S( 0.79)  
H 94 1S( 0.79)  
H 95 1S( 0.79)  
C 96 [core]2S( 0.92)2p( 3.18)3p( 0.02)  
C 97 [core]2S( 1.01)2p( 3.49)3p( 0.01)  
H 98 1S( 0.82)  
H 99 1S( 0.82)  
H 100 1S( 0.83)  
C 101 [core]2S( 1.00)2p( 3.50)3p( 0.01)  
H 102 1S( 0.83)  
H 103 1S( 0.81)  
H 104 1S( 0.82)  
C 105 [core]2S( 0.86)2p( 2.61)3S( 0.01)3p( 0.02)  
C 106 [core]2S( 1.02)2p( 3.56)3p( 0.01)  
H 107 1S( 0.79)  
H 108 1S( 0.79)  
H 109 1S( 0.79)  
C 110 [core]2S( 0.84)2p( 2.99)3p( 0.03)  
C 111 [core]2S( 0.90)2p( 3.07)3p( 0.03)  
C 112 [core]2S( 0.90)2p( 3.22)3p( 0.02)  
C 113 [core]2S( 0.93)2p( 3.20)3p( 0.02)  
C 114 [core]2S( 0.91)2p( 3.16)3p( 0.02)  
C 115 [core]2S( 0.92)2p( 3.26)3p( 0.02)  
C 116 [core]2S( 0.95)2p( 3.17)3p( 0.02)  
C 117 [core]2S( 1.01)2p( 3.49)3p( 0.01)  
H 118 1S( 0.83)  
H 119 1S( 0.82)  
H 120 1S( 0.81)  
C 121 [core]2S( 1.01)2p( 3.50)3p( 0.01)  
H 122 1S( 0.84)  
H 123 1S( 0.82)  
H 124 1S( 0.82)  
C 125 [core]2S( 0.86)2p( 2.60)3S( 0.01)3p( 0.02)  
C 126 [core]2S( 1.02)2p( 3.56)3p( 0.01)  
H 127 1S( 0.79)  
H 128 1S( 0.79)  
H 129 1S( 0.79)  
C 130 [core]2S( 0.84)2p( 2.99)3p( 0.03)  
C 131 [core]2S( 0.89)2p( 3.10)3p( 0.03)  
C 132 [core]2S( 0.93)2p( 3.21)3p( 0.02)  
C 133 [core]2S( 0.93)2p( 3.19)3p( 0.02)  
C 134 [core]2S( 0.94)2p( 3.20)3p( 0.02)  
C 135 [core]2S( 0.92)2p( 3.26)3p( 0.02)  
C 136 [core]2S( 0.95)2p( 3.17)3p( 0.02)  
C 137 [core]2S( 1.01)2p( 3.49)3p( 0.01)  
H 138 1S( 0.81)  
H 139 1S( 0.82)  
H 140 1S( 0.84)  
C 141 [core]2S( 1.01)2p( 3.50)3p( 0.01)

H 142 1S (0.82)  
H 143 1S (0.81)  
H 144 1S (0.82)  
H 145 1S (0.82)  
H 146 1S (0.83)  
H 147 1S (0.91)  
H 148 1S (0.83)  
H 149 1S (0.85)  
H 150 1S (0.86)  
H 151 1S (0.82)  
H 152 1S (0.87)  
H 153 1S (0.84)  
H 154 1S (0.83)  
H 155 1S (0.82)  
H 156 1S (0.84)  
H 157 1S (0.82)  
H 158 1S (0.83)  
H 159 1S (0.83)  
N 160 [core]2S( 1.36)2p( 4.29)3p( 0.02)  
N 161 [core]2S( 1.37)2p( 4.31)3p( 0.02)  
N 162 [core]2S( 1.36)2p( 4.32)3p( 0.03)

NBO analysis skipped by request.

1|1|UNPC-E-C07CYG43054|SP|RHF|LANL2DZ|C68H86N6Ti2(2+)|MCDSTFM|28-Mar-2013|0|# hf/lanl2dz guess=local pop=npa geom=connectivity|CSD ENTRY ofm27p-1||2,1|C,0,-0.621,11.017,13.349|H,0,-1.177,10.346,12.9|C,0,-0.739,10.785,14.852|C,0,-2.015,10.148,15.295|H,0,-2.016,10.067,16.252|H,0,-2.09,9.275,14.9|H,0,-2.757,10.69,15.018|C,0,0.148,11.089,17.013|C,0,0.985,10.208,17.693|C,0,0.971,10.268,19.087|C,0,0.176,11.185,19.77|C,0,-0.627,12.047,19.077|C,0,-0.643,11.998,17.693|C,0,1.819,9.184,16.967|C,0,1.205,7.812,17.086|H,0,1.219,7.534,18.005|H,0,1.706,7.189,16.556|H,0,0.296,7.84,16.775|C,0,3.252,9.155,17.411|H,0,3.644,10.023,17.287|H,0,3.736,8.508,16.894|H,0,3.294,8.916,18.342|C,0,-1.123,12.389,12.928|C,0,-1.683,12.464,11.553|H,0,-1.952,13.366,11.366|H,0,-2.443,11.882,11.485|H,0,-1.013,12.193,10.92|C,0,-1.289,14.701,13.374|C,0,-2.299,15.389,14.053|C,0,-2.443,16.734,13.698|C,0,-1.672,17.353,12.804|C,0,-0.656,16.666,12.16|C,0,-0.475,15.328,12.454|C,0,-3.102,14.741,15.141|C,0,-4.597,15.06,15.071|H,0,-4.721,16.012,15.051|H,0,-5.038,14.696,15.841|H,0,-4.969,14.672,14.275|C,0,-2.556,15.167,16.506|H,0,-1.629,14.924,16.571|H,0,-3.051,14.724,17.201|H,0,-2.647,16.117,16.605|C,0,0.815,10.804,12.893|C,0,1.185,9.393,12.567|H,0,2.083,9.368,12.227|H,0,0.582,9.048,11.905|H,0,1.129,8.856,13.361|C,0,2.969,11.72,12.532|C,0,3.431,12.293,11.344|C,0,4.804,12.3,11.145|C,0,5.677,11.78,12.074|C,0,5.203,11.206,13.224|C,0,3.845,11.176,13.461|C,0,2.448,12.825,10.329|C,0,1.935,11.697,9.445|H,0,2.663,11.335,8.935|H,0,1.264,12.038,8.848|H,0,1.555,11.008,9.994|C,0,3.008,13.957,9.46|H,0,3.415,14.62,10.024|H,0,2.294,14.36,8.959|H,0,3.663,13.603,8.857|H,0,1.538,9.696,19.606|H,0,0.278,11.174,20.699|H,0,-1.078,12.575,19.405|H,0,-1.108,12.636,17.199|H,0,1.915,9.405,16.088|H,0,-3.034,17.078,14.214|H,0,-1.668,18.26,12.539|H,0,-0.128,17.012,11.593|H,0,0.176,14.842,12.038|H,0,-3.047,13.778,15.075|H,0,5.205,12.708,10.391|H,0,6.536,11.897,11.825|H,0,5.812,10.806,13.832|H,0,3.561,10.76,14.23|H,0,1.65,13.154,10.819|N,0,0.214,11.175,15.584|N,0,-0.994,13.352,13.751|N,0,1.576,11.81,12.849|Ti,0,1.393,13.539,14.838|Ti,0,2.419,13.341,18.333|C,0,3.665,15.791,16.158|C,0,2.828,16.672,15.478|C,0,2.842,16.612,14.084|C,0,3.637,15.695,13.401|C,0,4.44,14.833,14.094|C,0,4.456,14.882,15.478|C,0,4.433,15.863,19.822|H,0,4.99,16.534,20.271|C,0,4.551,16.095,18.319|C,0,5.827,16.732,17.876|H,0,5.829,16.813,16.919|H,0,5.903,17.605,18.271|H,0,6.57,16.19,18.153|C,0,1.994,17.696,16.204|C,0,2.608,19.068,16.085|H,0,2.594,19.346,15.166|H,0,2.107,19.691,16.615|H,0,3.516,19.04,16.396|C,0,0.56,17.725,15.759|H,0,0.169,16.857,15.884|H,0,0.077,18.373,16.277|H,0,0.519,17.964,14.829|C,0,4.936,14.491,20.243|

C,0,5.496,14.416,21.617|H,0,5.765,13.514,21.805|H,0,6.256,14.998,21.685|H,0,4.825,14.687,22.251|C,0,5.102,12.179,19.796|C,0,6.111,11.491,19.118|C,0,6.256,10.146,19.473|C,0,5.485,9.527,20.367|C,0,4.469,10.214,21.01|C,0,4.288,11.552,20.717|C,0,6.915,12.139,18.03|C,0,8.41,11.82,18.1|H,0,8.533,10.868,18.12|H,0,8.851,12.184,17.33|H,0,8.781,12.208,18.896|C,0,6.369,11.713,16.665|H,0,5.442,11.956,16.6|H,0,6.864,12.156,15.97|H,0,6.46,10.763,16.566|C,0,2.998,16.076,20.278|C,0,2.628,17.487,20.604|H,0,1.73,17.512,20.944|H,0,3.231,17.832,21.266|H,0,2.684,18.025,19.81|C,0,0.844,15.16,20.639|C,0,0.382,14.587,21.826|C,0,-0.992,14.58,22.025|C,0,-1.864,15.1,21.097|C,0,-1.39,15.674,19.947|C,0,-0.032,15.704,19.71|C,0,1.365,14.055,22.841|C,0,1.878,15.183,23.725|H,0,1.15,15.545,24.236|H,0,2.549,14.842,24.323|H,0,2.257,15.872,23.176|C,0,0.805,12.923,23.711|H,0,0.398,12.26,23.147|H,0,1.519,12.52,24.211|H,0,0.15,13.277,24.314|H,0,2.275,17.184,13.565|H,0,3.535,15.706,12.472|H,0,4.891,14.305,13.766|H,0,4.921,14.244,15.972|H,0,1.898,17.475,17.083|H,0,6.846,9.802,18.957|H,0,5.481,8.62,20.632|H,0,3.941,9.868,21.578|H,0,3.637,12.038,21.133|H,0,6.86,13.102,18.096|H,0,-1.392,14.172,22.78|H,0,-2.723,14.983,21.345|H,0,-1.999,16.074,19.339|H,0,0.252,16.12,18.941|H,0,2.163,13.726,22.352|N,0,3.599,15.705,17.587|N,0,4.807,13.528,19.42|N,0,2.237,15.07,20.322||Version=IA32W-G09RevB.01|State=1-A|HF=-3049.1821674|RMSD=8.302e-009|Dipole=-0.001815,-0.0012772,-0.0006786|Quadrupole=-12.7696246,-18.9043313,31.6739558,9.3717472,25.6909605,22.5116277|PG=C01 [X(C68H86N6T12)]||@

IT IS THE BEHAVIOR AND DISTRIBUTION OF THE ELECTRONS  
AROUND THE NUCLEUS THAT GIVES THE FUNDAMENTAL  
CHARACTER OF AN ATOM: IT MUST BE THE SAME FOR MOLECULES.

-- C. A. COULSON, 1951

Job cpu time: 0 days 8 hours 52 minutes 45.0 seconds.

File lengths (MBytes): RWF= 410 Int= 0 D2E= 0 Chk= 28 Scr= 1

Normal termination of Gaussian 09 at Thu Mar 28 20:58:12 2013.

#### Appendix 4. Gaussian output for dication dimer, LANL2-DZ, DF-B3LYP.

\*\*\*\*\*

Gaussian 09: IA32W-G09RevB.01 12-Aug-2010

03-Apr-2013

\*\*\*\*\*

%chk=\\vdm09-g1.ds.man.ac.uk\HOME\Desktop\cation\_only\_edited.chk

# b3lyp/lanl2dz guess=local pop=npa geom=connectivity

1/38=1,57=2/1;

2/12=2,17=6,18=5,40=1/2;

3/5=6,6=3,11=2,16=1,25=1,30=1,74=-5/1,2,3;

4/9=10/1;

5/5=2,38=5/2;

6/7=2,8=2,9=2,10=2,28=1,40=-1/1,7;

99/5=1,9=1/99;

-----  
CSD ENTRY ofm27p-1

-----  
Symbolic Z-matrix:

Charge = 2 Multiplicity = 1

C(PDBName=C1,ResName=UNK,ResNum=1) -3.90302 0.0513 -2.73798

H(PDBName=H1,ResName=UNK,ResNum=1) -4.51453 0.0856 -3.50339

C(PDBName=C2,ResName=UNK,ResNum=1) -2.50325 -0.22743 -3.27621

C(PDBName=C3,ResName=UNK,ResNum=1) -2.46016 -0.97293 -4.56949



H(PDBName=H3A,ResName=UNK,ResNum=1) -1.54561 -1.12942 -4.81752  
H(PDBName=H3B,ResName=UNK,ResNum=1) -2.8923 -0.45272 -5.25244  
H(PDBName=H3C,ResName=UNK,ResNum=1) -2.91413 -1.81271 -4.47078  
C(PDBName=C4,ResName=UNK,ResNum=1) -0.17044 -0.15078 -2.95803  
C(PDBName=C5,ResName=UNK,ResNum=1) 0.68419 0.87238 -3.3604  
C(PDBName=C6,ResName=UNK,ResNum=1) 2.01941 0.53322 -3.58217  
C(PDBName=C7,ResName=UNK,ResNum=1) 2.48511 -0.76438 -3.38534  
C(PDBName=C8,ResName=UNK,ResNum=1) 1.62687 -1.74696 -2.97785  
C(PDBName=C9,ResName=UNK,ResNum=1) 0.29322 -1.44002 -2.76505  
C(PDBName=C10,ResName=UNK,ResNum=1) 0.18424 2.27091 -3.61605  
C(PDBName=C11,ResName=UNK,ResNum=1) 0.0753 2.53808 -5.09601  
H(PDBName=H11A,ResName=UNK,ResNum=1) 0.95035 2.51358 -5.49065  
H(PDBName=H11B,ResName=UNK,ResNum=1) -0.31535 3.40247 -5.2383  
H(PDBName=H11C,ResName=UNK,ResNum=1) -0.47715 1.86506 -5.503  
C(PDBName=C12,ResName=UNK,ResNum=1) 1.01133 3.33304 -2.95326  
H(PDBName=H12A,ResName=UNK,ResNum=1) 1.03452 3.17711 -2.00584  
H(PDBName=H12B,ResName=UNK,ResNum=1) 0.62748 4.19482 -3.12687  
H(PDBName=H12C,ResName=UNK,ResNum=1) 1.90718 3.30608 -3.30307  
C(PDBName=C13,ResName=UNK,ResNum=1) -4.39706 -1.03942 -1.80102  
C(PDBName=C14,ResName=UNK,ResNum=1) -5.87023 -1.23739 -1.78056  
H(PDBName=H14A,ResName=UNK,ResNum=1) -6.09179 -1.92487 -1.14872  
H(PDBName=H14B,ResName=UNK,ResNum=1) -6.17033 -1.49622 -2.65457  
H(PDBName=H14C,ResName=UNK,ResNum=1) -6.29922 -0.41714 -1.52328  
C(PDBName=C15,ResName=UNK,ResNum=1) -3.93053 -2.58047 -0.07494  
C(PDBName=C16,ResName=UNK,ResNum=1) -3.53748 -3.9179 -0.18112  
C(PDBName=C17,ResName=UNK,ResNum=1) -3.8687 -4.72256 0.91369  
C(PDBName=C18,ResName=UNK,ResNum=1) -4.48677 -4.27322 2.0059  
C(PDBName=C19,ResName=UNK,ResNum=1) -4.84453 -2.93896 2.1095  
C(PDBName=C20,ResName=UNK,ResNum=1) -4.56116 -2.09601 1.05188  
C(PDBName=C21,ResName=UNK,ResNum=1) -2.74341 -4.41709 -1.35104  
C(PDBName=C22,ResName=UNK,ResNum=1) -3.2185 -5.7723 -1.87959  
H(PDBName=H22A,ResName=UNK,ResNum=1) -3.23733 -6.40816 -1.16027  
H(PDBName=H22B,ResName=UNK,ResNum=1) -2.61728 -6.0782 -2.56138  
H(PDBName=H22C,ResName=UNK,ResNum=1) -4.10069 -5.67953 -2.24793  
C(PDBName=C23,ResName=UNK,ResNum=1) -1.26525 -4.51311 -0.96548  
H(PDBName=H23A,ResName=UNK,ResNum=1) -0.95162 -3.65163 -0.67897  
H(PDBName=H23B,ResName=UNK,ResNum=1) -0.75404 -4.80119 -1.72705  
H(PDBName=H23C,ResName=UNK,ResNum=1) -1.16076 -5.14668 -0.25256  
C(PDBName=C24,ResName=UNK,ResNum=1) -3.94505 1.41021 -2.05461  
C(PDBName=C25,ResName=UNK,ResNum=1) -4.20594 2.57565 -2.95337  
H(PDBName=H25A,ResName=UNK,ResNum=1) -4.28081 3.37547 -2.42676  
H(PDBName=H25B,ResName=UNK,ResNum=1) -5.02288 2.43207 -3.43593  
H(PDBName=H25C,ResName=UNK,ResNum=1) -3.47999 2.66918 -3.57483  
C(PDBName=C26,ResName=UNK,ResNum=1) -3.65267 2.67773 -0.07548  
C(PDBName=C27,ResName=UNK,ResNum=1) -4.64116 2.96957 0.86836  
C(PDBName=C28,ResName=UNK,ResNum=1) -4.44627 4.09908 1.65003  
C(PDBName=C29,ResName=UNK,ResNum=1) -3.3294 4.89303 1.51657  
C(PDBName=C30,ResName=UNK,ResNum=1) -2.38075 4.60023 0.57264  
C(PDBName=C31,ResName=UNK,ResNum=1) -2.53584 3.48772 -0.22705  
C(PDBName=C32,ResName=UNK,ResNum=1) -5.87096 2.09948 0.9688  
C(PDBName=C33,ResName=UNK,ResNum=1) -6.90447 2.51962 -0.06675  
H(PDBName=H33A,ResName=UNK,ResNum=1) -7.20256 3.4118 0.1237  
H(PDBName=H33B,ResName=UNK,ResNum=1) -7.65283 1.91808 -0.03451  
H(PDBName=H33C,ResName=UNK,ResNum=1) -6.51008 2.49367 -0.94099  
C(PDBName=C34,ResName=UNK,ResNum=1) -6.50534 2.08402 2.36433  
H(PDBName=H34A,ResName=UNK,ResNum=1) -5.82567 1.91157 3.0213  
H(PDBName=H34B,ResName=UNK,ResNum=1) -7.17142 1.39279 2.40624  
H(PDBName=H34C,ResName=UNK,ResNum=1) -6.91284 2.93323 2.53967  
H(PDBName=H6,ResName=UNK,ResNum=1) 2.65523 1.19992 -3.84539  
H(PDBName=H7,ResName=UNK,ResNum=1) 3.40432 -0.8729 -3.51517  
H(PDBName=H8,ResName=UNK,ResNum=1) 1.83432 -2.47498 -2.84854  
H(PDBName=H9,ResName=UNK,ResNum=1) -0.28755 -2.06844 -2.39748

H(PDBName=H10,ResName=UNK,ResNum=1) -0.62366 2.40685 -3.21666  
H(PDBName=H17,ResName=UNK,ResNum=1) -3.52705 -5.49686 0.78099  
H(PDBName=H18,ResName=UNK,ResNum=1) -4.7063 -4.73006 2.80339  
H(PDBName=H19,ResName=UNK,ResNum=1) -5.2273 -2.59646 2.78491  
H(PDBName=H20,ResName=UNK,ResNum=1) -4.79531 -1.21432 1.08126  
H(PDBName=H21,ResName=UNK,ResNum=1) -2.82683 -3.81171 -2.10023  
H(PDBName=H28,ResName=UNK,ResNum=1) -5.04175 4.34478 2.34344  
H(PDBName=H29,ResName=UNK,ResNum=1) -3.3227 5.56188 2.12168  
H(PDBName=H30,ResName=UNK,ResNum=1) -1.64143 5.18372 0.4565  
H(PDBName=H31,ResName=UNK,ResNum=1) -1.89342 3.33643 -0.86695  
H(PDBName=H32,ResName=UNK,ResNum=1) -5.61291 1.17463 0.71738  
N(PDBName=N1,ResName=UNK,ResNum=1) -1.51924 0.15405 -2.58171  
N(PDBName=N2,ResName=UNK,ResNum=1) -3.53596 -1.65812 -1.096  
N(PDBName=N3,ResName=UNK,ResNum=1) -3.73643 1.45227 -0.81051  
TI(PDBName=TI1,ResName=UNK,ResNum=1) -1.81636 -0.09599 0.13569  
TI(PDBName=TI1,ResName=UNK,ResNum=1) 1.81632 0.09545 -0.13607  
C(PDBName=C4,ResName=UNK,ResNum=1) 0.17068 0.15103 2.95819  
C(PDBName=C5,ResName=UNK,ResNum=1) -0.68394 -0.87212 3.36055  
C(PDBName=C6,ResName=UNK,ResNum=1) -2.01917 -0.53297 3.58233  
C(PDBName=C7,ResName=UNK,ResNum=1) -2.48487 0.76464 3.38549  
C(PDBName=C8,ResName=UNK,ResNum=1) -1.62662 1.74722 2.978  
C(PDBName=C9,ResName=UNK,ResNum=1) -0.29297 1.44028 2.76521  
C(PDBName=C1,ResName=UNK,ResNum=1) 3.90298 -0.05184 2.7376  
H(PDBName=H1,ResName=UNK,ResNum=1) 4.51477 -0.08534 3.50355  
C(PDBName=C2,ResName=UNK,ResNum=1) 2.50321 0.22689 3.27583  
C(PDBName=C3,ResName=UNK,ResNum=1) 2.46013 0.97239 4.56911  
H(PDBName=H3A,ResName=UNK,ResNum=1) 1.54585 1.12967 4.81767  
H(PDBName=H3B,ResName=UNK,ResNum=1) 2.89254 0.45297 5.2526  
H(PDBName=H3C,ResName=UNK,ResNum=1) 2.91438 1.81296 4.47093  
C(PDBName=C10,ResName=UNK,ResNum=1) -0.184 -2.27066 3.6162  
C(PDBName=C11,ResName=UNK,ResNum=1) -0.07506 -2.53782 5.09617  
H(PDBName=H11A,ResName=UNK,ResNum=1) -0.95011 -2.51333 5.49081  
H(PDBName=H11B,ResName=UNK,ResNum=1) 0.31559 -3.40222 5.23846  
H(PDBName=H11C,ResName=UNK,ResNum=1) 0.47711 -1.86561 5.50262  
C(PDBName=C12,ResName=UNK,ResNum=1) -1.01233 -3.33337 2.95307  
H(PDBName=H12A,ResName=UNK,ResNum=1) -1.03428 -3.17685 2.006  
H(PDBName=H12B,ResName=UNK,ResNum=1) -0.62721 -4.19514 3.12785  
H(PDBName=H12C,ResName=UNK,ResNum=1) -1.90694 -3.30583 3.30323  
C(PDBName=C13,ResName=UNK,ResNum=1) 4.3973 1.03967 1.80117  
C(PDBName=C14,ResName=UNK,ResNum=1) 5.86951 1.23785 1.78091  
H(PDBName=H14A,ResName=UNK,ResNum=1) 6.09203 1.92512 1.14888  
H(PDBName=H14B,ResName=UNK,ResNum=1) 6.16961 1.49668 2.65492  
H(PDBName=H14C,ResName=UNK,ResNum=1) 6.29918 0.4166 1.5229  
C(PDBName=C15,ResName=UNK,ResNum=1) 3.92981 2.58093 0.07529  
C(PDBName=C16,ResName=UNK,ResNum=1) 3.53744 3.91736 0.18074  
C(PDBName=C17,ResName=UNK,ResNum=1) 3.86894 4.72281 -0.91353  
C(PDBName=C18,ResName=UNK,ResNum=1) 4.48701 4.27347 -2.00574  
C(PDBName=C19,ResName=UNK,ResNum=1) 4.84381 2.93943 -2.10916  
C(PDBName=C20,ResName=UNK,ResNum=1) 4.56141 2.09626 -1.05172  
C(PDBName=C21,ResName=UNK,ResNum=1) 2.74365 4.41734 1.35119  
C(PDBName=C22,ResName=UNK,ResNum=1) 3.21874 5.77256 1.87975  
H(PDBName=H22A,ResName=UNK,ResNum=1) 3.2373 6.40761 1.15989  
H(PDBName=H22B,ResName=UNK,ResNum=1) 2.61752 6.07845 2.56154  
H(PDBName=H22C,ResName=UNK,ResNum=1) 4.10065 5.67899 2.24755  
C(PDBName=C23,ResName=UNK,ResNum=1) 1.26549 4.51336 0.96564  
H(PDBName=H23A,ResName=UNK,ResNum=1) 0.95186 3.65188 0.67912  
H(PDBName=H23B,ResName=UNK,ResNum=1) 0.75428 4.80144 1.7272  
H(PDBName=H23C,ResName=UNK,ResNum=1) 1.161 5.14693 0.25272  
C(PDBName=C24,ResName=UNK,ResNum=1) 3.94529 -1.40996 2.05477  
C(PDBName=C25,ResName=UNK,ResNum=1) 4.20618 -2.5754 2.95353  
H(PDBName=H25A,ResName=UNK,ResNum=1) 4.28106 -3.37521 2.42691  
H(PDBName=H25B,ResName=UNK,ResNum=1) 5.02312 -2.43182 3.43609

H(PDBName=H25C,ResName=UNK,ResNum=1) 3.48027 -2.66949 3.5758  
C(PDBName=C26,ResName=UNK,ResNum=1) 3.65291 -2.67748 0.07563  
C(PDBName=C27,ResName=UNK,ResNum=1) 4.64044 -2.96911 -0.86802  
C(PDBName=C28,ResName=UNK,ResNum=1) 4.44527 -4.09941 -1.65022  
C(PDBName=C29,ResName=UNK,ResNum=1) 3.32964 -4.89278 -1.51641  
C(PDBName=C30,ResName=UNK,ResNum=1) 2.38099 -4.59998 -0.57248  
C(PDBName=C31,ResName=UNK,ResNum=1) 2.53608 -3.48747 0.2272  
C(PDBName=C32,ResName=UNK,ResNum=1) 5.87024 -2.09902 -0.96845  
C(PDBName=C33,ResName=UNK,ResNum=1) 6.90375 -2.51915 0.06709  
H(PDBName=H33A,ResName=UNK,ResNum=1) 7.2028 -3.41155 -0.12354  
H(PDBName=H33B,ResName=UNK,ResNum=1) 7.65307 -1.91783 0.03466  
H(PDBName=H33C,ResName=UNK,ResNum=1) 6.50908 -2.494 0.9408  
C(PDBName=C34,ResName=UNK,ResNum=1) 6.50559 -2.08377 -2.36417  
H(PDBName=H34A,ResName=UNK,ResNum=1) 5.82591 -1.91132 -3.02115  
H(PDBName=H34B,ResName=UNK,ResNum=1) 7.1707 -1.39233 -2.40589  
H(PDBName=H34C,ResName=UNK,ResNum=1) 6.91308 -2.93298 -2.53952  
H(PDBName=H6,ResName=UNK,ResNum=1) -2.65499 -1.19966 3.84555  
H(PDBName=H7,ResName=UNK,ResNum=1) -3.40407 0.87315 3.51532  
H(PDBName=H8,ResName=UNK,ResNum=1) -1.83407 2.47523 2.8487  
H(PDBName=H9,ResName=UNK,ResNum=1) 0.2878 2.06869 2.39764  
H(PDBName=H10,ResName=UNK,ResNum=1) 0.62391 -2.4066 3.21681  
H(PDBName=H17,ResName=UNK,ResNum=1) 3.52701 5.49632 -0.78137  
H(PDBName=H18,ResName=UNK,ResNum=1) 4.70654 4.73031 -2.80323  
H(PDBName=H19,ResName=UNK,ResNum=1) 5.22754 2.59672 -2.78475  
H(PDBName=H20,ResName=UNK,ResNum=1) 4.79555 1.21458 -1.0811  
H(PDBName=H21,ResName=UNK,ResNum=1) 2.82707 3.81196 2.10039  
H(PDBName=H28,ResName=UNK,ResNum=1) 5.04199 -4.34452 -2.34329  
H(PDBName=H29,ResName=UNK,ResNum=1) 3.32199 -5.56142 -2.12133  
H(PDBName=H30,ResName=UNK,ResNum=1) 1.64167 -5.18347 -0.45634  
H(PDBName=H31,ResName=UNK,ResNum=1) 1.89366 -3.33618 0.86711  
H(PDBName=H32,ResName=UNK,ResNum=1) 5.61315 -1.17438 -0.71722  
N(PDBName=N1,ResName=UNK,ResNum=1) 1.51948 -0.1538 2.58187  
N(PDBName=N2,ResName=UNK,ResNum=1) 3.5362 1.65838 1.09615  
N(PDBName=N3,ResName=UNK,ResNum=1) 3.73667 -1.45202 0.81066

Residue 1 PDB Number 1\_0 UNK charge 0.00000000 ave dist 0.000

Stoichiometry C68H86N6Ti2(2+)

Framework group C1[X(C68H86N6Ti2)]

Deg. of freedom 480

Full point group C1 NOp 1

Largest Abelian subgroup C1 NOp 1

Largest concise Abelian subgroup C1 NOP 1

Standard orientation:

| Center<br>Number | Atomic<br>Number | Atomic<br>Type | Coordinates (Angstroms) |           |           |
|------------------|------------------|----------------|-------------------------|-----------|-----------|
|                  |                  |                | X                       | Y         | Z         |
| 1                | 6                | 0              | -3.903023               | 0.051295  | -2.737981 |
| 2                | 1                | 0              | -4.514533               | 0.085596  | -3.503394 |
| 3                | 6                | 0              | -2.503247               | -0.227432 | -3.276213 |
| 4                | 6                | 0              | -2.460164               | -0.972930 | -4.569492 |
| 5                | 1                | 0              | -1.545611               | -1.129417 | -4.817515 |
| 6                | 1                | 0              | -2.892297               | -0.452722 | -5.252444 |
| 7                | 1                | 0              | -2.914133               | -1.812707 | -4.470777 |
| 8                | 6                | 0              | -0.170439               | -0.150782 | -2.958032 |
| 9                | 6                | 0              | 0.684185                | 0.872376  | -3.360395 |
| 10               | 6                | 0              | 2.019408                | 0.533222  | -3.582174 |
| 11               | 6                | 0              | 2.485112                | -0.764383 | -3.385337 |
| 12               | 6                | 0              | 1.626865                | -1.746963 | -2.977845 |
| 13               | 6                | 0              | 0.293215                | -1.440024 | -2.765050 |
| 14               | 6                | 0              | 0.184239                | 2.270912  | -3.616048 |
| 15               | 6                | 0              | 0.075302                | 2.538076  | -5.096013 |

|    |   |   |           |           |           |
|----|---|---|-----------|-----------|-----------|
| 16 | 1 | 0 | 0.950346  | 2.513578  | -5.490651 |
| 17 | 1 | 0 | -0.315350 | 3.402468  | -5.238301 |
| 18 | 1 | 0 | -0.477148 | 1.865062  | -5.502998 |
| 19 | 6 | 0 | 1.011329  | 3.333035  | -2.953263 |
| 20 | 1 | 0 | 1.034524  | 3.177106  | -2.005839 |
| 21 | 1 | 0 | 0.627484  | 4.194823  | -3.126870 |
| 22 | 1 | 0 | 1.907183  | 3.306084  | -3.303069 |
| 23 | 6 | 0 | -4.397058 | -1.039420 | -1.801017 |
| 24 | 6 | 0 | -5.870231 | -1.237389 | -1.780559 |
| 25 | 1 | 0 | -6.091786 | -1.924870 | -1.148722 |
| 26 | 1 | 0 | -6.170325 | -1.496216 | -2.654573 |
| 27 | 1 | 0 | -6.299217 | -0.417141 | -1.523277 |
| 28 | 6 | 0 | -3.930526 | -2.580467 | -0.074942 |
| 29 | 6 | 0 | -3.537481 | -3.917900 | -0.181117 |
| 30 | 6 | 0 | -3.868700 | -4.722562 | 0.913689  |
| 31 | 6 | 0 | -4.486773 | -4.273217 | 2.005895  |
| 32 | 6 | 0 | -4.844529 | -2.938962 | 2.109501  |
| 33 | 6 | 0 | -4.561165 | -2.096006 | 1.051875  |
| 34 | 6 | 0 | -2.743405 | -4.417091 | -1.351036 |
| 35 | 6 | 0 | -3.218501 | -5.772304 | -1.879589 |
| 36 | 1 | 0 | -3.237334 | -6.408158 | -1.160273 |
| 37 | 1 | 0 | -2.617282 | -6.078198 | -2.561382 |
| 38 | 1 | 0 | -4.100692 | -5.679533 | -2.247930 |
| 39 | 6 | 0 | -1.265249 | -4.513108 | -0.965484 |
| 40 | 1 | 0 | -0.951616 | -3.651630 | -0.678966 |
| 41 | 1 | 0 | -0.754039 | -4.801185 | -1.727045 |
| 42 | 1 | 0 | -1.160762 | -5.146678 | -0.252564 |
| 43 | 6 | 0 | -3.945046 | 1.410207  | -2.054612 |
| 44 | 6 | 0 | -4.205935 | 2.575653  | -2.953371 |
| 45 | 1 | 0 | -4.280814 | 3.375466  | -2.426758 |
| 46 | 1 | 0 | -5.022881 | 2.432070  | -3.435929 |
| 47 | 1 | 0 | -3.479994 | 2.669176  | -3.574825 |
| 48 | 6 | 0 | -3.652669 | 2.677734  | -0.075475 |
| 49 | 6 | 0 | -4.641162 | 2.969572  | 0.868363  |
| 50 | 6 | 0 | -4.446268 | 4.099082  | 1.650030  |
| 51 | 6 | 0 | -3.329395 | 4.893029  | 1.516565  |
| 52 | 6 | 0 | -2.380753 | 4.600231  | 0.572637  |
| 53 | 6 | 0 | -2.535840 | 3.487717  | -0.227047 |
| 54 | 6 | 0 | -5.870955 | 2.099481  | 0.968797  |
| 55 | 6 | 0 | -6.904465 | 2.519616  | -0.066748 |
| 56 | 1 | 0 | -7.202563 | 3.411803  | 0.123697  |
| 57 | 1 | 0 | -7.652825 | 1.918078  | -0.034507 |
| 58 | 1 | 0 | -6.510077 | 2.493668  | -0.940994 |
| 59 | 6 | 0 | -6.505344 | 2.084019  | 2.364325  |
| 60 | 1 | 0 | -5.825671 | 1.911567  | 3.021302  |
| 61 | 1 | 0 | -7.171417 | 1.392791  | 2.406236  |
| 62 | 1 | 0 | -6.912835 | 2.933227  | 2.539671  |
| 63 | 1 | 0 | 2.655230  | 1.199916  | -3.845393 |
| 64 | 1 | 0 | 3.404316  | -0.872897 | -3.515165 |
| 65 | 1 | 0 | 1.834315  | -2.474982 | -2.848538 |
| 66 | 1 | 0 | -0.287553 | -2.068439 | -2.397481 |
| 67 | 1 | 0 | -0.623664 | 2.406848  | -3.216657 |
| 68 | 1 | 0 | -3.527049 | -5.496860 | 0.780988  |
| 69 | 1 | 0 | -4.706301 | -4.730062 | 2.803385  |
| 70 | 1 | 0 | -5.227296 | -2.596463 | 2.784907  |
| 71 | 1 | 0 | -4.795310 | -1.214323 | 1.081259  |
| 72 | 1 | 0 | -2.826831 | -3.811705 | -2.100233 |
| 73 | 1 | 0 | -5.041747 | 4.344775  | 2.343442  |
| 74 | 1 | 0 | -3.322704 | 5.561882  | 2.121677  |
| 75 | 1 | 0 | -1.641429 | 5.183719  | 0.456500  |
| 76 | 1 | 0 | -1.893421 | 3.336427  | -0.866954 |
| 77 | 1 | 0 | -5.612911 | 1.174631  | 0.717379  |

|     |    |   |           |           |           |
|-----|----|---|-----------|-----------|-----------|
| 78  | 7  | 0 | -1.519237 | 0.154047  | -2.581712 |
| 79  | 7  | 0 | -3.535959 | -1.658124 | -1.095997 |
| 80  | 7  | 0 | -3.736426 | 1.452274  | -0.810506 |
| 81  | 81 | 0 | -1.816362 | -0.095993 | 0.135685  |
| 82  | 81 | 0 | 1.816323  | 0.095450  | -0.136066 |
| 83  | 6  | 0 | 0.170681  | 0.151034  | 2.958188  |
| 84  | 6  | 0 | -0.683944 | -0.872124 | 3.360551  |
| 85  | 6  | 0 | -2.019167 | -0.532970 | 3.582331  |
| 86  | 6  | 0 | -2.484871 | 0.764635  | 3.385494  |
| 87  | 6  | 0 | -1.626623 | 1.747215  | 2.978002  |
| 88  | 6  | 0 | -0.292974 | 1.440276  | 2.765207  |
| 89  | 6  | 0 | 3.902984  | -0.051837 | 2.737600  |
| 90  | 1  | 0 | 4.514774  | -0.085344 | 3.503551  |
| 91  | 6  | 0 | 2.503207  | 0.226889  | 3.275832  |
| 92  | 6  | 0 | 2.460125  | 0.972387  | 4.569111  |
| 93  | 1  | 0 | 1.545852  | 1.129669  | 4.817671  |
| 94  | 1  | 0 | 2.892539  | 0.452974  | 5.252601  |
| 95  | 1  | 0 | 2.914375  | 1.812959  | 4.470934  |
| 96  | 6  | 0 | -0.183997 | -2.270660 | 3.616204  |
| 97  | 6  | 0 | -0.075061 | -2.537824 | 5.096170  |
| 98  | 1  | 0 | -0.950105 | -2.513326 | 5.490807  |
| 99  | 1  | 0 | 0.315592  | -3.402216 | 5.238458  |
| 100 | 1  | 0 | 0.477109  | -1.865605 | 5.502617  |
| 101 | 6  | 0 | -1.012327 | -3.333367 | 2.953071  |
| 102 | 1  | 0 | -1.034283 | -3.176854 | 2.005995  |
| 103 | 1  | 0 | -0.627206 | -4.195139 | 3.127848  |
| 104 | 1  | 0 | -1.906942 | -3.305832 | 3.303225  |
| 105 | 6  | 0 | 4.397299  | 1.039672  | 1.801173  |
| 106 | 6  | 0 | 5.869514  | 1.237852  | 1.780905  |
| 107 | 1  | 0 | 6.092028  | 1.925122  | 1.148879  |
| 108 | 1  | 0 | 6.169608  | 1.496679  | 2.654918  |
| 109 | 1  | 0 | 6.299178  | 0.416598  | 1.522896  |
| 110 | 6  | 0 | 3.929808  | 2.580930  | 0.075287  |
| 111 | 6  | 0 | 3.537442  | 3.917358  | 0.180736  |
| 112 | 6  | 0 | 3.868942  | 4.722814  | -0.913532 |
| 113 | 6  | 0 | 4.487014  | 4.273469  | -2.005739 |
| 114 | 6  | 0 | 4.843811  | 2.939425  | -2.109156 |
| 115 | 6  | 0 | 4.561407  | 2.096258  | -1.051719 |
| 116 | 6  | 0 | 2.743647  | 4.417343  | 1.351192  |
| 117 | 6  | 0 | 3.218742  | 5.772556  | 1.879746  |
| 118 | 1  | 0 | 3.237295  | 6.407615  | 1.159892  |
| 119 | 1  | 0 | 2.617523  | 6.078450  | 2.561539  |
| 120 | 1  | 0 | 4.100653  | 5.678990  | 2.247549  |
| 121 | 6  | 0 | 1.265490  | 4.513361  | 0.965640  |
| 122 | 1  | 0 | 0.951858  | 3.651882  | 0.679122  |
| 123 | 1  | 0 | 0.754281  | 4.801437  | 1.727201  |
| 124 | 1  | 0 | 1.161003  | 5.146930  | 0.252721  |
| 125 | 6  | 0 | 3.945288  | -1.409955 | 2.054769  |
| 126 | 6  | 0 | 4.206177  | -2.575401 | 2.953528  |
| 127 | 1  | 0 | 4.281056  | -3.375214 | 2.426914  |
| 128 | 1  | 0 | 5.023122  | -2.431818 | 3.436086  |
| 129 | 1  | 0 | 3.480273  | -2.669493 | 3.575803  |
| 130 | 6  | 0 | 3.652911  | -2.677482 | 0.075632  |
| 131 | 6  | 0 | 4.640444  | -2.969109 | -0.868017 |
| 132 | 6  | 0 | 4.445269  | -4.099414 | -1.650222 |
| 133 | 6  | 0 | 3.329636  | -4.892777 | -1.516408 |
| 134 | 6  | 0 | 2.380994  | -4.599979 | -0.572480 |
| 135 | 6  | 0 | 2.536082  | -3.487465 | 0.227203  |
| 136 | 6  | 0 | 5.870238  | -2.099018 | -0.968451 |
| 137 | 6  | 0 | 6.903748  | -2.519153 | 0.067093  |
| 138 | 1  | 0 | 7.202804  | -3.411550 | -0.123541 |
| 139 | 1  | 0 | 7.653067  | -1.917826 | 0.034663  |

|     |   |   |           |           |           |
|-----|---|---|-----------|-----------|-----------|
| 140 | 1 | 0 | 6.509079  | -2.494000 | 0.940802  |
| 141 | 6 | 0 | 6.505586  | -2.083767 | -2.364168 |
| 142 | 1 | 0 | 5.825913  | -1.911315 | -3.021146 |
| 143 | 1 | 0 | 7.170699  | -1.392328 | -2.405890 |
| 144 | 1 | 0 | 6.913077  | -2.932975 | -2.539515 |
| 145 | 1 | 0 | -2.654988 | -1.199664 | 3.845550  |
| 146 | 1 | 0 | -3.404074 | 0.873149  | 3.515322  |
| 147 | 1 | 0 | -1.834074 | 2.475234  | 2.848695  |
| 148 | 1 | 0 | 0.287795  | 2.068691  | 2.397638  |
| 149 | 1 | 0 | 0.623905  | -2.406596 | 3.216814  |
| 150 | 1 | 0 | 3.527009  | 5.496317  | -0.781369 |
| 151 | 1 | 0 | 4.706543  | 4.730314  | -2.803228 |
| 152 | 1 | 0 | 5.227537  | 2.596715  | -2.784751 |
| 153 | 1 | 0 | 4.795551  | 1.214575  | -1.081102 |
| 154 | 1 | 0 | 2.827073  | 3.811957  | 2.100390  |
| 155 | 1 | 0 | 5.041988  | -4.344523 | -2.343285 |
| 156 | 1 | 0 | 3.321986  | -5.561420 | -2.121332 |
| 157 | 1 | 0 | 1.641671  | -5.183467 | -0.456343 |
| 158 | 1 | 0 | 1.893663  | -3.336175 | 0.867111  |
| 159 | 1 | 0 | 5.613153  | -1.174379 | -0.717222 |
| 160 | 7 | 0 | 1.519479  | -0.153795 | 2.581869  |
| 161 | 7 | 0 | 3.536200  | 1.658376  | 1.096154  |
| 162 | 7 | 0 | 3.736668  | -1.452022 | 0.810662  |

-----  
Rotational constants (GHZ): 0.0363398 0.0248776 0.0221224

Standard basis: LANL2DZ (5D, 7F)

There are 874 symmetry adapted basis functions of A symmetry.

Integral buffers will be 262144 words long.

Raffenetti 2 integral format.

Two-electron integral symmetry is turned on.

874 basis functions, 2254 primitive gaussians, 878 cartesian basis functions

280 alpha electrons 280 beta electrons

nuclear repulsion energy 14838.1291604468 Hartrees.

NAtoms= 162 NActive= 162 NUniq= 162 SFac= 1.00D+00 NAtFMM= 50 NAOKFM=T Big=T

One-electron integrals computed using PRISM.

1 Symmetry operations used in ECPInt.

ECPInt: NShTT= 153735 NPrTT= 1086464 LenC2= 123334 LenP2D= 411860.

LDataN: DoStor=T MaxTD1= 6 Len= 172

NBasis= 874 RedAO= T NBF= 874

NBsUse= 874 1.00D-06 NBFU= 874

Defaulting to unpruned grid for atomic number 81.

Initial guess orbitals will be localized using method 0.

Harris functional with IExCor= 402 diagonalized for initial guess.

ExpMin= 4.44D-02 ExpMax= 5.91D+03 ExpMxC= 2.05D+02 IAcc=2 IRadAn= 0 AccDes= 0.00D+00

HarFok: IExCor= 402 AccDes= 0.00D+00 IRadAn= 0 IDoV= 1

ScaDFX= 1.000000 1.000000 1.000000 1.000000

Defaulting to unpruned grid for atomic number 81.

FoFCou: FMM=F IPFlag= 0 FMFlag= 100000 FMFlg1= 2001

NFxFlg= 0 DoJE=T BraDBF=F KetDBF=T FulRan=T

Omega= 0.000000 0.000000 1.000000 0.000000 0.000000 ICntrl= 500 IOpCl= 0

NMat0= 1 NMatS0= 1 NMatT0= 0 NMatD0= 1 NMtDS0= 0 NMtDT0= 0

IICent= 4 NGrid= 0.

Petite list used in FoFCou.

LocMO: Using Boys method

Initial Trace= 0.32522505D-01 Initial TraceA= 0.27077929D+04

RMSG= 0.21473963D-06

LocMO: Using Boys method

Initial Trace= 0.61330906D-01 Initial TraceA= 0.72931985D+02

Initial Trace= 0.61330906D-01 Initial TraceA= 0.72931985D+02

Initial Trace= 0.61330906D-01 Initial TraceA= 0.72931985D+02

Localization failed after 3 tries of 1000 iterations each. Last change= 0.10625022D-05

RMSG= 0.12549320D-03









|                            |          |          |          |          |          |
|----------------------------|----------|----------|----------|----------|----------|
| Alpha occ. eigenvalues --  | -0.92744 | -0.92732 | -0.92341 | -0.92331 | -0.92287 |
| Alpha occ. eigenvalues --  | -0.92278 | -0.91463 | -0.91429 | -0.90795 | -0.90737 |
| Alpha occ. eigenvalues --  | -0.90155 | -0.90144 | -0.89108 | -0.89064 | -0.88944 |
| Alpha occ. eigenvalues --  | -0.88941 | -0.88807 | -0.88704 | -0.88696 | -0.88663 |
| Alpha occ. eigenvalues --  | -0.88573 | -0.88567 | -0.87391 | -0.87387 | -0.86948 |
| Alpha occ. eigenvalues --  | -0.86944 | -0.86602 | -0.86598 | -0.82440 | -0.82439 |
| Alpha occ. eigenvalues --  | -0.81670 | -0.81648 | -0.81542 | -0.81505 | -0.81034 |
| Alpha occ. eigenvalues --  | -0.81008 | -0.80503 | -0.80492 | -0.80079 | -0.80072 |
| Alpha occ. eigenvalues --  | -0.76676 | -0.76646 | -0.76070 | -0.76066 | -0.75826 |
| Alpha occ. eigenvalues --  | -0.75769 | -0.75303 | -0.75299 | -0.74504 | -0.74485 |
| Alpha occ. eigenvalues --  | -0.73110 | -0.73092 | -0.70433 | -0.70399 | -0.69621 |
| Alpha occ. eigenvalues --  | -0.69591 | -0.68097 | -0.67977 | -0.67712 | -0.67651 |
| Alpha occ. eigenvalues --  | -0.67024 | -0.67012 | -0.66699 | -0.66682 | -0.65952 |
| Alpha occ. eigenvalues --  | -0.65932 | -0.65657 | -0.65625 | -0.64790 | -0.64746 |
| Alpha occ. eigenvalues --  | -0.64563 | -0.64550 | -0.64247 | -0.64206 | -0.63954 |
| Alpha occ. eigenvalues --  | -0.63944 | -0.63257 | -0.63231 | -0.63120 | -0.63101 |
| Alpha occ. eigenvalues --  | -0.62743 | -0.62721 | -0.62596 | -0.62548 | -0.62076 |
| Alpha occ. eigenvalues --  | -0.62068 | -0.61856 | -0.61824 | -0.61299 | -0.61248 |
| Alpha occ. eigenvalues --  | -0.61145 | -0.61113 | -0.61051 | -0.60979 | -0.60731 |
| Alpha occ. eigenvalues --  | -0.60706 | -0.60400 | -0.60375 | -0.59966 | -0.59962 |
| Alpha occ. eigenvalues --  | -0.59702 | -0.59467 | -0.58807 | -0.58760 | -0.58115 |
| Alpha occ. eigenvalues --  | -0.58090 | -0.57680 | -0.57659 | -0.57377 | -0.57317 |
| Alpha occ. eigenvalues --  | -0.57173 | -0.57146 | -0.57060 | -0.57031 | -0.56826 |
| Alpha occ. eigenvalues --  | -0.56744 | -0.56563 | -0.56356 | -0.56249 | -0.56103 |
| Alpha occ. eigenvalues --  | -0.56025 | -0.55793 | -0.55783 | -0.55584 | -0.55142 |
| Alpha occ. eigenvalues --  | -0.54786 | -0.54428 | -0.54408 | -0.54184 | -0.54056 |
| Alpha occ. eigenvalues --  | -0.53784 | -0.53727 | -0.53079 | -0.52880 | -0.52169 |
| Alpha occ. eigenvalues --  | -0.51965 | -0.51805 | -0.51765 | -0.51116 | -0.51022 |
| Alpha occ. eigenvalues --  | -0.50606 | -0.50554 | -0.50412 | -0.50373 | -0.50224 |
| Alpha occ. eigenvalues --  | -0.50065 | -0.49592 | -0.49523 | -0.49371 | -0.49171 |
| Alpha occ. eigenvalues --  | -0.49045 | -0.48975 | -0.48783 | -0.48771 | -0.48640 |
| Alpha occ. eigenvalues --  | -0.48514 | -0.48139 | -0.48105 | -0.47900 | -0.47821 |
| Alpha occ. eigenvalues --  | -0.46926 | -0.46858 | -0.46439 | -0.46081 | -0.45857 |
| Alpha occ. eigenvalues --  | -0.45814 | -0.43850 | -0.42198 | -0.42106 | -0.41993 |
| Alpha occ. eigenvalues --  | -0.40857 | -0.40854 | -0.40701 | -0.40633 | -0.40384 |
| Alpha occ. eigenvalues --  | -0.39574 | -0.39191 | -0.38793 | -0.38724 | -0.38377 |
| Alpha virt. eigenvalues -- | -0.20936 | -0.20915 | -0.20462 | -0.20342 | -0.19216 |
| Alpha virt. eigenvalues -- | -0.18772 | -0.18666 | -0.18090 | -0.17601 | -0.17303 |
| Alpha virt. eigenvalues -- | -0.16757 | -0.16469 | -0.16102 | -0.15861 | -0.15490 |
| Alpha virt. eigenvalues -- | -0.15467 | -0.15111 | -0.14917 | -0.14525 | -0.14234 |
| Alpha virt. eigenvalues -- | -0.12717 | -0.12068 | -0.09146 | -0.07700 | -0.07589 |
| Alpha virt. eigenvalues -- | -0.06694 | -0.06619 | -0.05934 | -0.05891 | -0.05587 |
| Alpha virt. eigenvalues -- | -0.05233 | -0.04810 | -0.04676 | -0.04147 | -0.03717 |
| Alpha virt. eigenvalues -- | -0.03411 | -0.02844 | -0.02623 | -0.02181 | -0.02158 |
| Alpha virt. eigenvalues -- | -0.01873 | -0.01836 | -0.01791 | -0.01698 | -0.01402 |
| Alpha virt. eigenvalues -- | -0.01319 | -0.00945 | -0.00712 | -0.00681 | -0.00536 |
| Alpha virt. eigenvalues -- | -0.00287 | -0.00256 | -0.00078 | 0.00141  | 0.00144  |
| Alpha virt. eigenvalues -- | 0.00457  | 0.00538  | 0.00647  | 0.00649  | 0.00675  |
| Alpha virt. eigenvalues -- | 0.00847  | 0.01025  | 0.01224  | 0.01399  | 0.01890  |
| Alpha virt. eigenvalues -- | 0.01902  | 0.01967  | 0.02221  | 0.02299  | 0.02507  |
| Alpha virt. eigenvalues -- | 0.02648  | 0.02690  | 0.02772  | 0.03045  | 0.03148  |
| Alpha virt. eigenvalues -- | 0.03302  | 0.03446  | 0.03523  | 0.03823  | 0.04042  |
| Alpha virt. eigenvalues -- | 0.04317  | 0.04563  | 0.04716  | 0.04735  | 0.04788  |
| Alpha virt. eigenvalues -- | 0.04861  | 0.05207  | 0.05296  | 0.05417  | 0.05529  |
| Alpha virt. eigenvalues -- | 0.05818  | 0.05949  | 0.06271  | 0.06278  | 0.06623  |
| Alpha virt. eigenvalues -- | 0.06676  | 0.06699  | 0.06906  | 0.07007  | 0.07036  |
| Alpha virt. eigenvalues -- | 0.07111  | 0.07449  | 0.07541  | 0.07751  | 0.07933  |
| Alpha virt. eigenvalues -- | 0.08001  | 0.08128  | 0.08450  | 0.08517  | 0.08790  |
| Alpha virt. eigenvalues -- | 0.08861  | 0.08987  | 0.09112  | 0.09218  | 0.09460  |
| Alpha virt. eigenvalues -- | 0.09595  | 0.09943  | 0.09952  | 0.10013  | 0.10085  |
| Alpha virt. eigenvalues -- | 0.10650  | 0.10699  | 0.10740  | 0.10869  | 0.10930  |
| Alpha virt. eigenvalues -- | 0.11034  | 0.11147  | 0.11279  | 0.11529  | 0.11649  |

|                            |         |         |         |         |         |
|----------------------------|---------|---------|---------|---------|---------|
| Alpha virt. eigenvalues -- | 0.11659 | 0.11794 | 0.11855 | 0.12050 | 0.12117 |
| Alpha virt. eigenvalues -- | 0.12528 | 0.12656 | 0.12760 | 0.12922 | 0.12989 |
| Alpha virt. eigenvalues -- | 0.13170 | 0.13338 | 0.13517 | 0.13722 | 0.13802 |
| Alpha virt. eigenvalues -- | 0.13996 | 0.14226 | 0.14404 | 0.14470 | 0.14645 |
| Alpha virt. eigenvalues -- | 0.14916 | 0.15166 | 0.15267 | 0.15705 | 0.15770 |
| Alpha virt. eigenvalues -- | 0.16001 | 0.16081 | 0.16271 | 0.16387 | 0.16554 |
| Alpha virt. eigenvalues -- | 0.16602 | 0.16656 | 0.16860 | 0.16865 | 0.17101 |
| Alpha virt. eigenvalues -- | 0.17198 | 0.17475 | 0.17555 | 0.17750 | 0.17926 |
| Alpha virt. eigenvalues -- | 0.17993 | 0.18029 | 0.18324 | 0.18489 | 0.18682 |
| Alpha virt. eigenvalues -- | 0.18741 | 0.18857 | 0.18954 | 0.19036 | 0.19171 |
| Alpha virt. eigenvalues -- | 0.19327 | 0.19355 | 0.19726 | 0.19798 | 0.20036 |
| Alpha virt. eigenvalues -- | 0.20193 | 0.20204 | 0.20396 | 0.20408 | 0.20448 |
| Alpha virt. eigenvalues -- | 0.20756 | 0.20852 | 0.20978 | 0.21185 | 0.21321 |
| Alpha virt. eigenvalues -- | 0.21587 | 0.21592 | 0.21878 | 0.21904 | 0.22069 |
| Alpha virt. eigenvalues -- | 0.22449 | 0.22641 | 0.22990 | 0.23143 | 0.23240 |
| Alpha virt. eigenvalues -- | 0.23426 | 0.23614 | 0.23811 | 0.23904 | 0.23950 |
| Alpha virt. eigenvalues -- | 0.24115 | 0.24139 | 0.24388 | 0.24640 | 0.24709 |
| Alpha virt. eigenvalues -- | 0.24724 | 0.24803 | 0.24903 | 0.24991 | 0.25595 |
| Alpha virt. eigenvalues -- | 0.25618 | 0.25632 | 0.26003 | 0.26227 | 0.26277 |
| Alpha virt. eigenvalues -- | 0.26465 | 0.26508 | 0.26657 | 0.27045 | 0.27129 |
| Alpha virt. eigenvalues -- | 0.27165 | 0.27212 | 0.27253 | 0.27538 | 0.27952 |
| Alpha virt. eigenvalues -- | 0.28037 | 0.28045 | 0.28068 | 0.28190 | 0.28387 |
| Alpha virt. eigenvalues -- | 0.28411 | 0.28797 | 0.29082 | 0.29139 | 0.29555 |
| Alpha virt. eigenvalues -- | 0.29624 | 0.29750 | 0.29919 | 0.30079 | 0.30367 |
| Alpha virt. eigenvalues -- | 0.30593 | 0.30800 | 0.31071 | 0.31322 | 0.31479 |
| Alpha virt. eigenvalues -- | 0.31520 | 0.31565 | 0.31889 | 0.31973 | 0.32145 |
| Alpha virt. eigenvalues -- | 0.32149 | 0.32419 | 0.32490 | 0.32904 | 0.32919 |
| Alpha virt. eigenvalues -- | 0.32993 | 0.33473 | 0.33479 | 0.33548 | 0.34151 |
| Alpha virt. eigenvalues -- | 0.34259 | 0.34384 | 0.34483 | 0.34503 | 0.35066 |
| Alpha virt. eigenvalues -- | 0.35464 | 0.35693 | 0.36086 | 0.36304 | 0.36464 |
| Alpha virt. eigenvalues -- | 0.36664 | 0.36765 | 0.37043 | 0.37093 | 0.37152 |
| Alpha virt. eigenvalues -- | 0.37577 | 0.37621 | 0.37827 | 0.37989 | 0.38010 |
| Alpha virt. eigenvalues -- | 0.38406 | 0.38592 | 0.38643 | 0.38646 | 0.39189 |
| Alpha virt. eigenvalues -- | 0.39458 | 0.39670 | 0.39714 | 0.40141 | 0.40157 |
| Alpha virt. eigenvalues -- | 0.40491 | 0.40572 | 0.40729 | 0.40938 | 0.41347 |
| Alpha virt. eigenvalues -- | 0.41451 | 0.41579 | 0.41936 | 0.42097 | 0.42319 |
| Alpha virt. eigenvalues -- | 0.42386 | 0.42631 | 0.42669 | 0.42705 | 0.43325 |
| Alpha virt. eigenvalues -- | 0.43504 | 0.43640 | 0.43706 | 0.43969 | 0.44251 |
| Alpha virt. eigenvalues -- | 0.44324 | 0.44363 | 0.44771 | 0.44942 | 0.45069 |
| Alpha virt. eigenvalues -- | 0.45140 | 0.45205 | 0.45450 | 0.46186 | 0.46344 |
| Alpha virt. eigenvalues -- | 0.46457 | 0.46586 | 0.46972 | 0.47018 | 0.47321 |
| Alpha virt. eigenvalues -- | 0.47444 | 0.47574 | 0.48378 | 0.48413 | 0.48727 |
| Alpha virt. eigenvalues -- | 0.48773 | 0.49098 | 0.49244 | 0.49497 | 0.49730 |
| Alpha virt. eigenvalues -- | 0.50093 | 0.50183 | 0.50547 | 0.50611 | 0.51143 |
| Alpha virt. eigenvalues -- | 0.51391 | 0.51529 | 0.52429 | 0.52443 | 0.52776 |
| Alpha virt. eigenvalues -- | 0.52860 | 0.53273 | 0.53709 | 0.53782 | 0.54759 |
| Alpha virt. eigenvalues -- | 0.54847 | 0.55289 | 0.55437 | 0.56202 | 0.56414 |
| Alpha virt. eigenvalues -- | 0.56499 | 0.57230 | 0.57494 | 0.57754 | 0.57956 |
| Alpha virt. eigenvalues -- | 0.58280 | 0.58375 | 0.58821 | 0.58982 | 0.59249 |
| Alpha virt. eigenvalues -- | 0.59573 | 0.60239 | 0.60709 | 0.61146 | 0.61455 |
| Alpha virt. eigenvalues -- | 0.61651 | 0.61703 | 0.62241 | 0.62248 | 0.62440 |
| Alpha virt. eigenvalues -- | 0.62525 | 0.63265 | 0.63647 | 0.64072 | 0.64798 |
| Alpha virt. eigenvalues -- | 0.64942 | 0.65473 | 0.65767 | 0.65774 | 0.66250 |
| Alpha virt. eigenvalues -- | 0.67347 | 0.68057 | 0.68132 | 0.69071 | 0.69207 |
| Alpha virt. eigenvalues -- | 0.69672 | 0.69919 | 0.70735 | 0.71015 | 0.71201 |
| Alpha virt. eigenvalues -- | 0.71629 | 0.73334 | 0.73783 | 0.74693 | 0.74802 |
| Alpha virt. eigenvalues -- | 0.74974 | 0.75405 | 0.75878 | 0.77910 | 0.78093 |
| Alpha virt. eigenvalues -- | 0.80237 | 0.81578 | 0.83458 | 0.84315 | 0.84347 |
| Alpha virt. eigenvalues -- | 0.85357 | 0.87869 | 0.88538 | 0.88692 | 0.89460 |
| Alpha virt. eigenvalues -- | 0.92657 | 0.92863 | 0.93627 | 0.96740 | 0.98649 |
| Alpha virt. eigenvalues -- | 0.99402 | 0.99562 | 0.99970 | 1.00054 | 1.00220 |
| Alpha virt. eigenvalues -- | 1.00289 | 1.00975 | 1.01602 | 1.01908 | 1.02421 |

|                            |         |         |          |          |         |
|----------------------------|---------|---------|----------|----------|---------|
| Alpha virt. eigenvalues -- | 1.03000 | 1.03997 | 1.04210  | 1.04702  | 1.04962 |
| Alpha virt. eigenvalues -- | 1.05979 | 1.06223 | 1.06444  | 1.07249  | 1.07619 |
| Alpha virt. eigenvalues -- | 1.08465 | 1.08532 | 1.09459  | 1.09835  | 1.10183 |
| Alpha virt. eigenvalues -- | 1.10224 | 1.10941 | 1.11052  | 1.11325  | 1.11663 |
| Alpha virt. eigenvalues -- | 1.12082 | 1.12220 | 1.12378  | 1.12698  | 1.12905 |
| Alpha virt. eigenvalues -- | 1.12969 | 1.13949 | 1.14295  | 1.14324  | 1.14534 |
| Alpha virt. eigenvalues -- | 1.14569 | 1.14855 | 1.15212  | 1.15701  | 1.15770 |
| Alpha virt. eigenvalues -- | 1.15794 | 1.15901 | 1.16169  | 1.16759  | 1.16949 |
| Alpha virt. eigenvalues -- | 1.17017 | 1.17477 | 1.17611  | 1.17887  | 1.18307 |
| Alpha virt. eigenvalues -- | 1.18500 | 1.18508 | 1.19049  | 1.19188  | 1.19602 |
| Alpha virt. eigenvalues -- | 1.19770 | 1.20334 | 1.20553  | 1.20900  | 1.21069 |
| Alpha virt. eigenvalues -- | 1.21338 | 1.21478 | 1.21932  | 1.22192  | 1.22540 |
| Alpha virt. eigenvalues -- | 1.22852 | 1.22899 | 1.23497  | 1.23543  | 1.23921 |
| Alpha virt. eigenvalues -- | 1.24108 | 1.24345 | 1.24632  | 1.25332  | 1.25403 |
| Alpha virt. eigenvalues -- | 1.26279 | 1.26343 | 1.27136  | 1.27180  | 1.27341 |
| Alpha virt. eigenvalues -- | 1.27478 | 1.27666 | 1.28232  | 1.28434  | 1.28971 |
| Alpha virt. eigenvalues -- | 1.29354 | 1.29858 | 1.29920  | 1.30307  | 1.31105 |
| Alpha virt. eigenvalues -- | 1.31111 | 1.31501 | 1.31613  | 1.32025  | 1.32178 |
| Alpha virt. eigenvalues -- | 1.32844 | 1.33352 | 1.33383  | 1.33787  | 1.33984 |
| Alpha virt. eigenvalues -- | 1.35529 | 1.35534 | 1.35773  | 1.36179  | 1.36824 |
| Alpha virt. eigenvalues -- | 1.36889 | 1.37857 | 1.38193  | 1.38705  | 1.39545 |
| Alpha virt. eigenvalues -- | 1.39570 | 1.40821 | 1.41402  | 1.41666  | 1.41730 |
| Alpha virt. eigenvalues -- | 1.42215 | 1.42756 | 1.43488  | 1.44205  | 1.45233 |
| Alpha virt. eigenvalues -- | 1.45987 | 1.46965 | 1.47466  | 1.48410  | 1.48962 |
| Alpha virt. eigenvalues -- | 1.50054 | 1.50500 | 1.51207  | 1.51560  | 1.52074 |
| Alpha virt. eigenvalues -- | 1.53354 | 1.55025 | 1.55077  | 1.56166  | 1.56530 |
| Alpha virt. eigenvalues -- | 1.56925 | 1.57306 | 1.58205  | 1.58694  | 1.59198 |
| Alpha virt. eigenvalues -- | 1.59278 | 1.60676 | 1.61880  | 1.62417  | 1.64141 |
| Alpha virt. eigenvalues -- | 1.64840 | 1.65555 | 1.66559  | 1.69267  | 1.74599 |
| Alpha virt. eigenvalues -- | 1.75002 | 1.78851 | 1.78966  | 1.79909  | 1.81076 |
| Alpha virt. eigenvalues -- | 1.87930 | 1.89120 | 11.12065 | 11.15176 |         |

Condensed to atoms (all electrons):

Mulliken atomic charges:

1

|      |           |
|------|-----------|
| 1 C  | -0.333911 |
| 2 H  | 0.265782  |
| 3 C  | 0.127837  |
| 4 C  | -0.780046 |
| 5 H  | 0.297158  |
| 6 H  | 0.284250  |
| 7 H  | 0.281275  |
| 8 C  | 0.011102  |
| 9 C  | 0.327394  |
| 10 C | -0.467888 |
| 11 C | -0.339764 |
| 12 C | -0.536073 |
| 13 C | -0.452126 |
| 14 C | -0.288567 |
| 15 C | -0.731062 |
| 16 H | 0.250191  |
| 17 H | 0.249865  |
| 18 H | 0.239525  |
| 19 C | -0.745451 |
| 20 H | 0.244420  |
| 21 H | 0.256114  |
| 22 H | 0.249806  |
| 23 C | 0.135312  |
| 24 C | -0.787881 |
| 25 H | 0.301723  |
| 26 H | 0.286571  |
| 27 H | 0.285099  |
| 28 C | 0.034581  |

29 C 0.306330  
30 C -0.467734  
31 C -0.308329  
32 C -0.414991  
33 C -0.460677  
34 C -0.272945  
35 C -0.740638  
36 H 0.241202  
37 H 0.248146  
38 H 0.254732  
39 C -0.758627  
40 H 0.236766  
41 H 0.251303  
42 H 0.255408  
43 C 0.125836  
44 C -0.782316  
45 H 0.299187  
46 H 0.284487  
47 H 0.277726  
48 C 0.086060  
49 C 0.311069  
50 C -0.448951  
51 C -0.377576  
52 C -0.261371  
53 C -0.483340  
54 C -0.234559  
55 C -0.742056  
56 H 0.262206  
57 H 0.252734  
58 H 0.238845  
59 C -0.752076  
60 H 0.233642  
61 H 0.255805  
62 H 0.247188  
63 H 0.330560  
64 H 0.322589  
65 H 0.591807  
66 H 0.355698  
67 H 0.273663  
68 H 0.384422  
69 H 0.312428  
70 H 0.420651  
71 H 0.372535  
72 H 0.243027  
73 H 0.327664  
74 H 0.358452  
75 H 0.307297  
76 H 0.369920  
77 H 0.215491  
78 N -0.197911  
79 N -0.232535  
80 N -0.233998  
81 Tl 0.650540  
82 Tl 0.650548  
83 C 0.011362  
84 C 0.327311  
85 C -0.467876  
86 C -0.339763  
87 C -0.536052  
88 C -0.452201  
89 C -0.333158  
90 H 0.265199

91 C 0.127634  
92 C -0.780647  
93 H 0.297313  
94 H 0.284381  
95 H 0.281053  
96 C -0.289442  
97 C -0.731310  
98 H 0.250160  
99 H 0.249821  
100 H 0.239983  
101 C -0.744731  
102 H 0.244392  
103 H 0.255544  
104 H 0.250238  
105 C 0.135290  
106 C -0.787938  
107 H 0.301810  
108 H 0.286681  
109 H 0.284569  
110 C 0.034285  
111 C 0.306052  
112 C -0.468198  
113 C -0.308613  
114 C -0.413913  
115 C -0.460742  
116 C -0.273140  
117 C -0.740243  
118 H 0.241122  
119 H 0.248072  
120 H 0.254763  
121 C -0.758739  
122 H 0.236770  
123 H 0.251335  
124 H 0.255370  
125 C 0.126099  
126 C -0.782435  
127 H 0.299201  
128 H 0.284571  
129 H 0.277579  
130 C 0.086418  
131 C 0.310248  
132 C -0.448260  
133 C -0.377588  
134 C -0.261409  
135 C -0.483449  
136 C -0.235026  
137 C -0.742096  
138 H 0.262066  
139 H 0.252513  
140 H 0.239148  
141 C -0.752139  
142 H 0.233609  
143 H 0.255983  
144 H 0.247189  
145 H 0.330513  
146 H 0.322563  
147 H 0.591797  
148 H 0.355719  
149 H 0.273802  
150 H 0.385192  
151 H 0.312463  
152 H 0.419807

153 H 0.372590  
154 H 0.242978  
155 H 0.327373  
156 H 0.358736  
157 H 0.307282  
158 H 0.369913  
159 H 0.215813  
160 N -0.197158  
161 N -0.231984  
162 N -0.233992

Sum of Mulliken atomic charges = 2.00000

Mulliken charges with hydrogens summed into heavy atoms:

1

1 C -0.068129  
3 C 0.127837  
4 C 0.082638  
8 C 0.011102  
9 C 0.327394  
10 C -0.137327  
11 C -0.017175  
12 C 0.055734  
13 C -0.096427  
14 C -0.014904  
15 C 0.008519  
19 C 0.004888  
23 C 0.135312  
24 C 0.085512  
28 C 0.034581  
29 C 0.306330  
30 C -0.083312  
31 C 0.004099  
32 C 0.005660  
33 C -0.088141  
34 C -0.029919  
35 C 0.003442  
39 C -0.015150  
43 C 0.125836  
44 C 0.079084  
48 C 0.086060  
49 C 0.311069  
50 C -0.121287  
51 C -0.019123  
52 C 0.045926  
53 C -0.113420  
54 C -0.019068  
55 C 0.011729  
59 C -0.015441  
78 N -0.197911  
79 N -0.232535  
80 N -0.233998  
81 Tl 0.650540  
82 Tl 0.650548  
83 C 0.011362  
84 C 0.327311  
85 C -0.137363  
86 C -0.017201  
87 C 0.055745  
88 C -0.096481  
89 C -0.067958  
91 C 0.127634  
92 C 0.082099  
96 C -0.015640

97 C 0.008654  
101 C 0.005442  
105 C 0.135290  
106 C 0.085122  
110 C 0.034285  
111 C 0.306052  
112 C -0.083006  
113 C 0.003850  
114 C 0.005895  
115 C -0.088153  
116 C -0.030162  
117 C 0.003713  
121 C -0.015265  
125 C 0.126099  
126 C 0.078916  
130 C 0.086418  
131 C 0.310248  
132 C -0.120887  
133 C -0.018852  
134 C 0.045873  
135 C -0.113536  
136 C -0.019213  
137 C 0.011631  
141 C -0.015358  
160 N -0.197158  
161 N -0.231984  
162 N -0.233992

Sum of Mulliken charges with hydrogens summed into heavy atoms = 2.00000

Electronic spatial extent (au):  $\langle R^{*2} \rangle = 55179.7615$

Charge= 2.0000 electrons

Dipole moment (field-independent basis, Debye):

X= -0.0008 Y= -0.0012 Z= -0.0030 Tot= 0.0033

Quadrupole moment (field-independent basis, Debye-Ang):

XX= -290.4308 YY= -377.6805 ZZ= -373.5408

XY= -5.3358 XZ= 27.7707 YZ= -0.3635

Traceless Quadrupole moment (field-independent basis, Debye-Ang):

XX= 56.7866 YY= -30.4631 ZZ= -26.3234

XY= -5.3358 XZ= 27.7707 YZ= -0.3635

Octapole moment (field-independent basis, Debye-Ang\*\*2):

XXX= 0.0082 YYY= -0.1873 ZZZ= 0.0124 XYY= -0.0458

XXY= 0.0306 XXZ= -0.0442 XZZ= -0.0317 YZZ= -0.0179

YYZ= -0.0730 XYZ= -0.0507

Hexadecapole moment (field-independent basis, Debye-Ang\*\*3):

XXXX= -30982.2777 YYYY= -20106.9176 ZZZZ= -14318.3487 XXXY= -630.0522

XXXZ= 287.9859 YYYX= 164.9672 YYYZ= 260.4428 ZZZX= 536.5887

ZZZY= -241.5723 XXYY= -8751.7082 XXZZ= -7092.4410 YYZZ= -5618.2510

XXYZ= 141.7306 YYXZ= -307.9519 ZZXY= 80.4701

N-N= 1.483812916045D+04 E-N=-3.673304832783D+04 KE= 3.044672329488D+03

\*\*\*\*\*Gaussian NBO Version 3.1\*\*\*\*\*

NATURAL ATOMIC ORBITAL AND  
NATURAL BOND ORBITAL ANALYSIS

\*\*\*\*\*Gaussian NBO Version 3.1\*\*\*\*\*

/RESON / : Allow strongly delocalized NBO set

Analyzing the SCF density

Job title: CSD ENTRY ofm27p-1

Storage needed: 2371396 in NPA ( 33481086 available)

NATURAL POPULATIONS: Natural atomic orbital occupancies



| NAO | Atom | No | lang | Type(AO) | Occupancy | Energy    |
|-----|------|----|------|----------|-----------|-----------|
| 1   | C    | 1  | S    | Cor( 1S) | 1.99882   | -10.23427 |
| 2   | C    | 1  | S    | Val( 2S) | 0.96075   | -0.35897  |
| 3   | C    | 1  | S    | Ryd( 3S) | 0.00111   | 1.35451   |
| 4   | C    | 1  | px   | Val( 2p) | 1.12008   | -0.26082  |
| 5   | C    | 1  | px   | Ryd( 3p) | 0.01055   | 0.39243   |
| 6   | C    | 1  | py   | Val( 2p) | 1.07297   | -0.28135  |
| 7   | C    | 1  | py   | Ryd( 3p) | 0.00594   | 0.34299   |
| 8   | C    | 1  | pz   | Val( 2p) | 1.15114   | -0.24983  |
| 9   | C    | 1  | pz   | Ryd( 3p) | 0.01367   | 0.41365   |
| 10  | H    | 2  | S    | Val( 1S) | 0.77092   | 0.01379   |
| 11  | H    | 2  | S    | Ryd( 2S) | 0.00188   | 0.89805   |
| 12  | C    | 3  | S    | Cor( 1S) | 1.99900   | -10.30754 |
| 13  | C    | 3  | S    | Val( 2S) | 0.85587   | -0.32376  |
| 14  | C    | 3  | S    | Ryd( 3S) | 0.00474   | 0.94734   |
| 15  | C    | 3  | px   | Val( 2p) | 0.91499   | -0.20614  |
| 16  | C    | 3  | px   | Ryd( 3p) | 0.00700   | 0.45204   |
| 17  | C    | 3  | py   | Val( 2p) | 0.84205   | -0.27685  |
| 18  | C    | 3  | py   | Ryd( 3p) | 0.00798   | 0.35828   |
| 19  | C    | 3  | pz   | Val( 2p) | 0.92087   | -0.23319  |
| 20  | C    | 3  | pz   | Ryd( 3p) | 0.00677   | 0.41287   |
| 21  | C    | 4  | S    | Cor( 1S) | 1.99907   | -10.16140 |
| 22  | C    | 4  | S    | Val( 2S) | 1.02345   | -0.29132  |
| 23  | C    | 4  | S    | Ryd( 3S) | 0.00053   | 1.05488   |
| 24  | C    | 4  | px   | Val( 2p) | 1.26715   | -0.20659  |
| 25  | C    | 4  | px   | Ryd( 3p) | 0.00260   | 0.15957   |
| 26  | C    | 4  | py   | Val( 2p) | 1.20848   | -0.21458  |
| 27  | C    | 4  | py   | Ryd( 3p) | 0.00201   | 0.18319   |
| 28  | C    | 4  | pz   | Val( 2p) | 1.13477   | -0.23240  |
| 29  | C    | 4  | pz   | Ryd( 3p) | 0.00351   | 0.16823   |
| 30  | H    | 5  | S    | Val( 1S) | 0.77349   | 0.03085   |
| 31  | H    | 5  | S    | Ryd( 2S) | 0.00144   | 0.81496   |
| 32  | H    | 6  | S    | Val( 1S) | 0.76876   | 0.02294   |
| 33  | H    | 6  | S    | Ryd( 2S) | 0.00102   | 0.74571   |
| 34  | H    | 7  | S    | Val( 1S) | 0.77062   | 0.02020   |
| 35  | H    | 7  | S    | Ryd( 2S) | 0.00101   | 0.75225   |
| 36  | C    | 8  | S    | Cor( 1S) | 1.99873   | -10.25755 |
| 37  | C    | 8  | S    | Val( 2S) | 0.84207   | -0.27531  |
| 38  | C    | 8  | S    | Ryd( 3S) | 0.00198   | 1.07008   |
| 39  | C    | 8  | px   | Val( 2p) | 0.89434   | -0.20233  |
| 40  | C    | 8  | px   | Ryd( 3p) | 0.01412   | 0.57295   |
| 41  | C    | 8  | py   | Val( 2p) | 1.07307   | -0.21663  |
| 42  | C    | 8  | py   | Ryd( 3p) | 0.00510   | 0.43334   |
| 43  | C    | 8  | pz   | Val( 2p) | 1.03116   | -0.27444  |
| 44  | C    | 8  | pz   | Ryd( 3p) | 0.00801   | 0.35060   |
| 45  | C    | 9  | S    | Cor( 1S) | 1.99891   | -10.22240 |
| 46  | C    | 9  | S    | Val( 2S) | 0.89121   | -0.28186  |
| 47  | C    | 9  | S    | Ryd( 3S) | 0.00175   | 1.12664   |
| 48  | C    | 9  | px   | Val( 2p) | 1.06187   | -0.20170  |
| 49  | C    | 9  | px   | Ryd( 3p) | 0.00744   | 0.48019   |
| 50  | C    | 9  | py   | Val( 2p) | 1.06118   | -0.21040  |
| 51  | C    | 9  | py   | Ryd( 3p) | 0.00959   | 0.58686   |

|     |   |    |    |          |         |           |
|-----|---|----|----|----------|---------|-----------|
| 52  | C | 9  | pz | Val( 2p) | 0.98440 | -0.25346  |
| 53  | C | 9  | pz | Ryd( 3p) | 0.00685 | 0.39912   |
| 54  | C | 10 | S  | Cor( 1S) | 1.99906 | -10.19632 |
| 55  | C | 10 | S  | Val( 2S) | 0.93745 | -0.27267  |
| 56  | C | 10 | S  | Ryd( 3S) | 0.00130 | 1.02671   |
| 57  | C | 10 | px | Val( 2p) | 1.10929 | -0.16743  |
| 58  | C | 10 | px | Ryd( 3p) | 0.00641 | 0.38470   |
| 59  | C | 10 | py | Val( 2p) | 1.11083 | -0.16791  |
| 60  | C | 10 | py | Ryd( 3p) | 0.00448 | 0.46244   |
| 61  | C | 10 | pz | Val( 2p) | 1.00019 | -0.25693  |
| 62  | C | 10 | pz | Ryd( 3p) | 0.00351 | 0.27207   |
| 63  | C | 11 | S  | Cor( 1S) | 1.99917 | -10.19601 |
| 64  | C | 11 | S  | Val( 2S) | 0.93831 | -0.25988  |
| 65  | C | 11 | S  | Ryd( 3S) | 0.00150 | 0.95053   |
| 66  | C | 11 | px | Val( 2p) | 1.15915 | -0.10801  |
| 67  | C | 11 | px | Ryd( 3p) | 0.00685 | 0.43549   |
| 68  | C | 11 | py | Val( 2p) | 1.04953 | -0.18528  |
| 69  | C | 11 | py | Ryd( 3p) | 0.00382 | 0.34433   |
| 70  | C | 11 | pz | Val( 2p) | 1.00319 | -0.25676  |
| 71  | C | 11 | pz | Ryd( 3p) | 0.00372 | 0.28236   |
| 72  | C | 12 | S  | Cor( 1S) | 1.99858 | -10.15233 |
| 73  | C | 12 | S  | Val( 2S) | 0.87393 | -0.11866  |
| 74  | C | 12 | S  | Ryd( 3S) | 0.00108 | 0.96431   |
| 75  | C | 12 | px | Val( 2p) | 1.06280 | -0.17858  |
| 76  | C | 12 | px | Ryd( 3p) | 0.00404 | 0.42785   |
| 77  | C | 12 | py | Val( 2p) | 1.12700 | -0.01159  |
| 78  | C | 12 | py | Ryd( 3p) | 0.00713 | 0.33730   |
| 79  | C | 12 | pz | Val( 2p) | 0.99869 | -0.25361  |
| 80  | C | 12 | pz | Ryd( 3p) | 0.00405 | 0.33470   |
| 81  | C | 13 | S  | Cor( 1S) | 1.99904 | -10.19692 |
| 82  | C | 13 | S  | Val( 2S) | 0.92823 | -0.26055  |
| 83  | C | 13 | S  | Ryd( 3S) | 0.00138 | 1.08466   |
| 84  | C | 13 | px | Val( 2p) | 1.10023 | -0.17272  |
| 85  | C | 13 | px | Ryd( 3p) | 0.00520 | 0.48594   |
| 86  | C | 13 | py | Val( 2p) | 1.10399 | -0.17481  |
| 87  | C | 13 | py | Ryd( 3p) | 0.00724 | 0.37207   |
| 88  | C | 13 | pz | Val( 2p) | 1.04828 | -0.25589  |
| 89  | C | 13 | pz | Ryd( 3p) | 0.00395 | 0.36796   |
| 90  | C | 14 | S  | Cor( 1S) | 1.99896 | -10.17752 |
| 91  | C | 14 | S  | Val( 2S) | 0.91775 | -0.24279  |
| 92  | C | 14 | S  | Ryd( 3S) | 0.00053 | 1.36681   |
| 93  | C | 14 | px | Val( 2p) | 1.14115 | -0.13973  |
| 94  | C | 14 | px | Ryd( 3p) | 0.00867 | 0.33968   |
| 95  | C | 14 | py | Val( 2p) | 1.01731 | -0.19789  |
| 96  | C | 14 | py | Ryd( 3p) | 0.00434 | 0.33814   |
| 97  | C | 14 | pz | Val( 2p) | 1.04581 | -0.18590  |
| 98  | C | 14 | pz | Ryd( 3p) | 0.00315 | 0.39390   |
| 99  | C | 15 | S  | Cor( 1S) | 1.99918 | -10.11990 |
| 100 | C | 15 | S  | Val( 2S) | 1.01165 | -0.23312  |
| 101 | C | 15 | S  | Ryd( 3S) | 0.00051 | 1.02956   |
| 102 | C | 15 | px | Val( 2p) | 1.24284 | -0.15573  |
| 103 | C | 15 | px | Ryd( 3p) | 0.00248 | 0.16004   |
| 104 | C | 15 | py | Val( 2p) | 1.23533 | -0.15386  |
| 105 | C | 15 | py | Ryd( 3p) | 0.00279 | 0.20106   |
| 106 | C | 15 | pz | Val( 2p) | 1.07768 | -0.18481  |
| 107 | C | 15 | pz | Ryd( 3p) | 0.00290 | 0.18908   |

|     |   |    |    |          |         |           |
|-----|---|----|----|----------|---------|-----------|
| 108 | H | 16 | S  | Val( 1S) | 0.79821 | 0.05817   |
| 109 | H | 16 | S  | Ryd( 2S) | 0.00152 | 0.75032   |
| 110 | H | 17 | S  | Val( 1S) | 0.79391 | 0.06437   |
| 111 | H | 17 | S  | Ryd( 2S) | 0.00122 | 0.74153   |
| 112 | H | 18 | S  | Val( 1S) | 0.80358 | 0.05321   |
| 113 | H | 18 | S  | Ryd( 2S) | 0.00128 | 0.78190   |
| 114 | C | 19 | S  | Cor( 1S) | 1.99921 | -10.11942 |
| 115 | C | 19 | S  | Val( 2S) | 1.00349 | -0.22629  |
| 116 | C | 19 | S  | Ryd( 3S) | 0.00045 | 1.06664   |
| 117 | C | 19 | px | Val( 2p) | 1.19655 | -0.16870  |
| 118 | C | 19 | px | Ryd( 3p) | 0.00229 | 0.29795   |
| 119 | C | 19 | py | Val( 2p) | 1.16494 | -0.17342  |
| 120 | C | 19 | py | Ryd( 3p) | 0.00317 | 0.29118   |
| 121 | C | 19 | pz | Val( 2p) | 1.19914 | -0.16208  |
| 122 | C | 19 | pz | Ryd( 3p) | 0.00324 | 0.26417   |
| 123 | H | 20 | S  | Val( 1S) | 0.81143 | 0.04469   |
| 124 | H | 20 | S  | Ryd( 2S) | 0.00145 | 0.91511   |
| 125 | H | 21 | S  | Val( 1S) | 0.79308 | 0.06497   |
| 126 | H | 21 | S  | Ryd( 2S) | 0.00128 | 0.79256   |
| 127 | H | 22 | S  | Val( 1S) | 0.80320 | 0.04837   |
| 128 | H | 22 | S  | Ryd( 2S) | 0.00180 | 0.86595   |
| 129 | C | 23 | S  | Cor( 1S) | 1.99899 | -10.30473 |
| 130 | C | 23 | S  | Val( 2S) | 0.85654 | -0.32328  |
| 131 | C | 23 | S  | Ryd( 3S) | 0.00496 | 0.98224   |
| 132 | C | 23 | px | Val( 2p) | 0.94981 | -0.20699  |
| 133 | C | 23 | px | Ryd( 3p) | 0.00706 | 0.44214   |
| 134 | C | 23 | py | Val( 2p) | 0.86994 | -0.25263  |
| 135 | C | 23 | py | Ryd( 3p) | 0.00899 | 0.38652   |
| 136 | C | 23 | pz | Val( 2p) | 0.85920 | -0.25120  |
| 137 | C | 23 | pz | Ryd( 3p) | 0.00640 | 0.38854   |
| 138 | C | 24 | S  | Cor( 1S) | 1.99907 | -10.15620 |
| 139 | C | 24 | S  | Val( 2S) | 1.02082 | -0.28520  |
| 140 | C | 24 | S  | Ryd( 3S) | 0.00055 | 1.08178   |
| 141 | C | 24 | px | Val( 2p) | 1.10118 | -0.23787  |
| 142 | C | 24 | px | Ryd( 3p) | 0.00413 | 0.15620   |
| 143 | C | 24 | py | Val( 2p) | 1.25338 | -0.20370  |
| 144 | C | 24 | py | Ryd( 3p) | 0.00213 | 0.16080   |
| 145 | C | 24 | pz | Val( 2p) | 1.25978 | -0.20331  |
| 146 | C | 24 | pz | Ryd( 3p) | 0.00217 | 0.20372   |
| 147 | H | 25 | S  | Val( 1S) | 0.76956 | 0.03800   |
| 148 | H | 25 | S  | Ryd( 2S) | 0.00130 | 0.82303   |
| 149 | H | 26 | S  | Val( 1S) | 0.76802 | 0.02947   |
| 150 | H | 26 | S  | Ryd( 2S) | 0.00108 | 0.75421   |
| 151 | H | 27 | S  | Val( 1S) | 0.77263 | 0.01826   |
| 152 | H | 27 | S  | Ryd( 2S) | 0.00117 | 0.81650   |
| 153 | C | 28 | S  | Cor( 1S) | 1.99877 | -10.24349 |
| 154 | C | 28 | S  | Val( 2S) | 0.84459 | -0.26332  |
| 155 | C | 28 | S  | Ryd( 3S) | 0.00207 | 1.04583   |
| 156 | C | 28 | px | Val( 2p) | 1.04372 | -0.25197  |

|     |   |    |    |          |         |           |
|-----|---|----|----|----------|---------|-----------|
| 157 | C | 28 | px | Ryd( 3p) | 0.00666 | 0.40465   |
| 158 | C | 28 | py | Val( 2p) | 1.00567 | -0.19710  |
| 159 | C | 28 | py | Ryd( 3p) | 0.00718 | 0.51745   |
| 160 | C | 28 | pz | Val( 2p) | 0.95595 | -0.20324  |
| 161 | C | 28 | pz | Ryd( 3p) | 0.01041 | 0.52898   |
| 162 | C | 29 | S  | Cor( 1S) | 1.99899 | -10.21076 |
| 163 | C | 29 | S  | Val( 2S) | 0.89205 | -0.26761  |
| 164 | C | 29 | S  | Ryd( 3S) | 0.00139 | 1.11335   |
| 165 | C | 29 | px | Val( 2p) | 0.99405 | -0.22967  |
| 166 | C | 29 | px | Ryd( 3p) | 0.00762 | 0.42570   |
| 167 | C | 29 | py | Val( 2p) | 1.04364 | -0.18445  |
| 168 | C | 29 | py | Ryd( 3p) | 0.00654 | 0.48167   |
| 169 | C | 29 | pz | Val( 2p) | 1.03886 | -0.19866  |
| 170 | C | 29 | pz | Ryd( 3p) | 0.00843 | 0.52924   |
| 171 | C | 30 | S  | Cor( 1S) | 1.99889 | -10.15233 |
| 172 | C | 30 | S  | Val( 2S) | 0.89472 | -0.16917  |
| 173 | C | 30 | S  | Ryd( 3S) | 0.00093 | 0.97774   |
| 174 | C | 30 | px | Val( 2p) | 1.02190 | -0.20503  |
| 175 | C | 30 | px | Ryd( 3p) | 0.00252 | 0.32440   |
| 176 | C | 30 | py | Val( 2p) | 1.14851 | -0.08294  |
| 177 | C | 30 | py | Ryd( 3p) | 0.00768 | 0.26759   |
| 178 | C | 30 | pz | Val( 2p) | 1.06639 | -0.18198  |
| 179 | C | 30 | pz | Ryd( 3p) | 0.00297 | 0.45086   |
| 180 | C | 31 | S  | Cor( 1S) | 1.99921 | -10.17727 |
| 181 | C | 31 | S  | Val( 2S) | 0.93342 | -0.23034  |
| 182 | C | 31 | S  | Ryd( 3S) | 0.00089 | 0.89781   |
| 183 | C | 31 | px | Val( 2p) | 1.00626 | -0.21900  |
| 184 | C | 31 | px | Ryd( 3p) | 0.00298 | 0.27519   |
| 185 | C | 31 | py | Val( 2p) | 1.08341 | -0.15648  |
| 186 | C | 31 | py | Ryd( 3p) | 0.00455 | 0.30994   |
| 187 | C | 31 | pz | Val( 2p) | 1.12364 | -0.11033  |
| 188 | C | 31 | pz | Ryd( 3p) | 0.00541 | 0.34449   |
| 189 | C | 32 | S  | Cor( 1S) | 1.99904 | -10.16401 |
| 190 | C | 32 | S  | Val( 2S) | 0.91220 | -0.18502  |
| 191 | C | 32 | S  | Ryd( 3S) | 0.00075 | 0.89437   |
| 192 | C | 32 | px | Val( 2p) | 1.02124 | -0.20666  |
| 193 | C | 32 | px | Ryd( 3p) | 0.00402 | 0.26067   |
| 194 | C | 32 | py | Val( 2p) | 1.06117 | -0.15001  |
| 195 | C | 32 | py | Ryd( 3p) | 0.00343 | 0.35270   |
| 196 | C | 32 | pz | Val( 2p) | 1.09786 | -0.10058  |
| 197 | C | 32 | pz | Ryd( 3p) | 0.00569 | 0.29191   |
| 198 | C | 33 | S  | Cor( 1S) | 1.99907 | -10.17873 |
| 199 | C | 33 | S  | Val( 2S) | 0.92137 | -0.23660  |
| 200 | C | 33 | S  | Ryd( 3S) | 0.00121 | 1.01641   |
| 201 | C | 33 | px | Val( 2p) | 1.04295 | -0.24337  |
| 202 | C | 33 | px | Ryd( 3p) | 0.00442 | 0.31812   |
| 203 | C | 33 | py | Val( 2p) | 1.15849 | -0.11235  |
| 204 | C | 33 | py | Ryd( 3p) | 0.00683 | 0.51603   |
| 205 | C | 33 | pz | Val( 2p) | 1.07167 | -0.20609  |
| 206 | C | 33 | pz | Ryd( 3p) | 0.00466 | 0.44128   |
| 207 | C | 34 | S  | Cor( 1S) | 1.99911 | -10.18966 |
| 208 | C | 34 | S  | Val( 2S) | 0.94564 | -0.28345  |
| 209 | C | 34 | S  | Ryd( 3S) | 0.00052 | 1.35521   |
| 210 | C | 34 | px | Val( 2p) | 1.00836 | -0.19886  |
| 211 | C | 34 | px | Ryd( 3p) | 0.00272 | 0.31802   |
| 212 | C | 34 | py | Val( 2p) | 1.08863 | -0.18196  |

|     |   |    |    |          |         |           |
|-----|---|----|----|----------|---------|-----------|
| 213 | C | 34 | py | Ryd( 3p) | 0.00735 | 0.45107   |
| 214 | C | 34 | pz | Val( 2p) | 1.10051 | -0.16176  |
| 215 | C | 34 | pz | Ryd( 3p) | 0.00587 | 0.27539   |
| 216 | C | 35 | S  | Cor( 1S) | 1.99917 | -10.11250 |
| 217 | C | 35 | S  | Val( 2S) | 1.01313 | -0.22724  |
| 218 | C | 35 | S  | Ryd( 3S) | 0.00041 | 1.02022   |
| 219 | C | 35 | px | Val( 2p) | 1.22944 | -0.14792  |
| 220 | C | 35 | px | Ryd( 3p) | 0.00294 | 0.20060   |
| 221 | C | 35 | py | Val( 2p) | 1.10372 | -0.17052  |
| 222 | C | 35 | py | Ryd( 3p) | 0.00269 | 0.18602   |
| 223 | C | 35 | pz | Val( 2p) | 1.22101 | -0.15129  |
| 224 | C | 35 | pz | Ryd( 3p) | 0.00249 | 0.18062   |
| 225 | H | 36 | S  | Val( 1S) | 0.80572 | 0.05818   |
| 226 | H | 36 | S  | Ryd( 2S) | 0.00141 | 0.77765   |
| 227 | H | 37 | S  | Val( 1S) | 0.79524 | 0.07114   |
| 228 | H | 37 | S  | Ryd( 2S) | 0.00125 | 0.75152   |
| 229 | H | 38 | S  | Val( 1S) | 0.79419 | 0.07425   |
| 230 | H | 38 | S  | Ryd( 2S) | 0.00118 | 0.74307   |
| 231 | C | 39 | S  | Cor( 1S) | 1.99918 | -10.12829 |
| 232 | C | 39 | S  | Val( 2S) | 1.01080 | -0.23849  |
| 233 | C | 39 | S  | Ryd( 3S) | 0.00051 | 1.02927   |
| 234 | C | 39 | px | Val( 2p) | 1.09587 | -0.19700  |
| 235 | C | 39 | px | Ryd( 3p) | 0.00379 | 0.37972   |
| 236 | C | 39 | py | Val( 2p) | 1.22861 | -0.15981  |
| 237 | C | 39 | py | Ryd( 3p) | 0.00292 | 0.22824   |
| 238 | C | 39 | pz | Val( 2p) | 1.23561 | -0.16171  |
| 239 | C | 39 | pz | Ryd( 3p) | 0.00227 | 0.32099   |
| 240 | H | 40 | S  | Val( 1S) | 0.81581 | 0.03854   |
| 241 | H | 40 | S  | Ryd( 2S) | 0.00150 | 0.89133   |
| 242 | H | 41 | S  | Val( 1S) | 0.79483 | 0.05659   |
| 243 | H | 41 | S  | Ryd( 2S) | 0.00138 | 0.77936   |
| 244 | H | 42 | S  | Val( 1S) | 0.79958 | 0.05439   |
| 245 | H | 42 | S  | Ryd( 2S) | 0.00150 | 0.79942   |
| 246 | C | 43 | S  | Cor( 1S) | 1.99898 | -10.30614 |
| 247 | C | 43 | S  | Val( 2S) | 0.85448 | -0.32225  |
| 248 | C | 43 | S  | Ryd( 3S) | 0.00488 | 0.95167   |
| 249 | C | 43 | px | Val( 2p) | 0.80819 | -0.29302  |
| 250 | C | 43 | px | Ryd( 3p) | 0.00761 | 0.34571   |
| 251 | C | 43 | py | Val( 2p) | 0.98559 | -0.24260  |
| 252 | C | 43 | py | Ryd( 3p) | 0.00632 | 0.49835   |
| 253 | C | 43 | pz | Val( 2p) | 0.88388 | -0.18050  |
| 254 | C | 43 | pz | Ryd( 3p) | 0.00802 | 0.42276   |
| 255 | C | 44 | S  | Cor( 1S) | 1.99907 | -10.16054 |
| 256 | C | 44 | S  | Val( 2S) | 1.02262 | -0.29020  |
| 257 | C | 44 | S  | Ryd( 3S) | 0.00054 | 1.06163   |
| 258 | C | 44 | px | Val( 2p) | 1.24258 | -0.20525  |
| 259 | C | 44 | px | Ryd( 3p) | 0.00149 | 0.21599   |
| 260 | C | 44 | py | Val( 2p) | 1.16523 | -0.22726  |
| 261 | C | 44 | py | Ryd( 3p) | 0.00379 | 0.18126   |
| 262 | C | 44 | pz | Val( 2p) | 1.20513 | -0.21972  |
| 263 | C | 44 | pz | Ryd( 3p) | 0.00276 | 0.13999   |

|     |   |    |    |          |         |           |
|-----|---|----|----|----------|---------|-----------|
| 264 | H | 45 | S  | Val( 1S) | 0.77005 | 0.03427   |
| 265 | H | 45 | S  | Ryd( 2S) | 0.00126 | 0.80851   |
| 266 | H | 46 | S  | Val( 1S) | 0.77014 | 0.02659   |
| 267 | H | 46 | S  | Ryd( 2S) | 0.00100 | 0.75232   |
| 268 | H | 47 | S  | Val( 1S) | 0.77147 | 0.01884   |
| 269 | H | 47 | S  | Ryd( 2S) | 0.00104 | 0.78255   |
| 270 | C | 48 | S  | Cor( 1S) | 1.99878 | -10.25139 |
| 271 | C | 48 | S  | Val( 2S) | 0.84199 | -0.26805  |
| 272 | C | 48 | S  | Ryd( 3S) | 0.00210 | 1.06407   |
| 273 | C | 48 | px | Val( 2p) | 1.07871 | -0.22305  |
| 274 | C | 48 | px | Ryd( 3p) | 0.00511 | 0.43222   |
| 275 | C | 48 | py | Val( 2p) | 0.90470 | -0.20131  |
| 276 | C | 48 | py | Ryd( 3p) | 0.00771 | 0.48783   |
| 277 | C | 48 | pz | Val( 2p) | 1.01707 | -0.23851  |
| 278 | C | 48 | pz | Ryd( 3p) | 0.01077 | 0.55558   |
| 279 | C | 49 | S  | Cor( 1S) | 1.99897 | -10.21149 |
| 280 | C | 49 | S  | Val( 2S) | 0.89039 | -0.26733  |
| 281 | C | 49 | S  | Ryd( 3S) | 0.00140 | 1.11279   |
| 282 | C | 49 | px | Val( 2p) | 1.04112 | -0.20769  |
| 283 | C | 49 | px | Ryd( 3p) | 0.00824 | 0.57463   |
| 284 | C | 49 | py | Val( 2p) | 1.04258 | -0.20741  |
| 285 | C | 49 | py | Ryd( 3p) | 0.00685 | 0.44991   |
| 286 | C | 49 | pz | Val( 2p) | 1.02408 | -0.21424  |
| 287 | C | 49 | pz | Ryd( 3p) | 0.00695 | 0.42913   |
| 288 | C | 50 | S  | Cor( 1S) | 1.99907 | -10.17686 |
| 289 | C | 50 | S  | Val( 2S) | 0.93223 | -0.24308  |
| 290 | C | 50 | S  | Ryd( 3S) | 0.00099 | 0.97926   |
| 291 | C | 50 | px | Val( 2p) | 1.08847 | -0.17199  |
| 292 | C | 50 | px | Ryd( 3p) | 0.00423 | 0.36828   |
| 293 | C | 50 | py | Val( 2p) | 1.04257 | -0.19125  |
| 294 | C | 50 | py | Ryd( 3p) | 0.00362 | 0.34058   |
| 295 | C | 50 | pz | Val( 2p) | 1.08605 | -0.17157  |
| 296 | C | 50 | pz | Ryd( 3p) | 0.00545 | 0.28876   |
| 297 | C | 51 | S  | Cor( 1S) | 1.99914 | -10.17026 |
| 298 | C | 51 | S  | Val( 2S) | 0.92654 | -0.21781  |
| 299 | C | 51 | S  | Ryd( 3S) | 0.00073 | 0.88052   |
| 300 | C | 51 | px | Val( 2p) | 1.03637 | -0.18468  |
| 301 | C | 51 | px | Ryd( 3p) | 0.00293 | 0.31452   |
| 302 | C | 51 | py | Val( 2p) | 1.09676 | -0.14756  |
| 303 | C | 51 | py | Ryd( 3p) | 0.00566 | 0.26692   |
| 304 | C | 51 | pz | Val( 2p) | 1.07130 | -0.15510  |
| 305 | C | 51 | pz | Ryd( 3p) | 0.00413 | 0.28887   |
| 306 | C | 52 | S  | Cor( 1S) | 1.99921 | -10.18795 |
| 307 | C | 52 | S  | Val( 2S) | 0.93838 | -0.24833  |
| 308 | C | 52 | S  | Ryd( 3S) | 0.00084 | 0.89380   |
| 309 | C | 52 | px | Val( 2p) | 1.11394 | -0.15476  |
| 310 | C | 52 | px | Ryd( 3p) | 0.00645 | 0.41687   |
| 311 | C | 52 | py | Val( 2p) | 1.06987 | -0.16746  |
| 312 | C | 52 | py | Ryd( 3p) | 0.00438 | 0.29831   |
| 313 | C | 52 | pz | Val( 2p) | 1.02873 | -0.20630  |
| 314 | C | 52 | pz | Ryd( 3p) | 0.00327 | 0.29916   |
| 315 | C | 53 | S  | Cor( 1S) | 1.99906 | -10.18583 |
| 316 | C | 53 | S  | Val( 2S) | 0.92120 | -0.24351  |
| 317 | C | 53 | S  | Ryd( 3S) | 0.00128 | 1.02224   |

|     |   |    |    |          |         |           |
|-----|---|----|----|----------|---------|-----------|
| 318 | C | 53 | px | Val( 2p) | 1.11282 | -0.17221  |
| 319 | C | 53 | px | Ryd( 3p) | 0.00641 | 0.40996   |
| 320 | C | 53 | py | Val( 2p) | 1.06101 | -0.21870  |
| 321 | C | 53 | py | Ryd( 3p) | 0.00416 | 0.40047   |
| 322 | C | 53 | pz | Val( 2p) | 1.10248 | -0.18765  |
| 323 | C | 53 | pz | Ryd( 3p) | 0.00492 | 0.39497   |
| 324 | C | 54 | S  | Cor( 1S) | 1.99916 | -10.19254 |
| 325 | C | 54 | S  | Val( 2S) | 0.95064 | -0.29306  |
| 326 | C | 54 | S  | Ryd( 3S) | 0.00052 | 1.37887   |
| 327 | C | 54 | px | Val( 2p) | 1.02515 | -0.19674  |
| 328 | C | 54 | px | Ryd( 3p) | 0.00392 | 0.36320   |
| 329 | C | 54 | py | Val( 2p) | 1.13815 | -0.15971  |
| 330 | C | 54 | py | Ryd( 3p) | 0.00680 | 0.30045   |
| 331 | C | 54 | pz | Val( 2p) | 1.02763 | -0.19656  |
| 332 | C | 54 | pz | Ryd( 3p) | 0.00445 | 0.43287   |
| 333 | C | 55 | S  | Cor( 1S) | 1.99916 | -10.11642 |
| 334 | C | 55 | S  | Val( 2S) | 1.01167 | -0.23017  |
| 335 | C | 55 | S  | Ryd( 3S) | 0.00050 | 1.04528   |
| 336 | C | 55 | px | Val( 2p) | 1.16131 | -0.16752  |
| 337 | C | 55 | px | Ryd( 3p) | 0.00285 | 0.19637   |
| 338 | C | 55 | py | Val( 2p) | 1.23887 | -0.15362  |
| 339 | C | 55 | py | Ryd( 3p) | 0.00209 | 0.21422   |
| 340 | C | 55 | pz | Val( 2p) | 1.15310 | -0.16396  |
| 341 | C | 55 | pz | Ryd( 3p) | 0.00324 | 0.21214   |
| 342 | H | 56 | S  | Val( 1S) | 0.79315 | 0.07319   |
| 343 | H | 56 | S  | Ryd( 2S) | 0.00160 | 0.76206   |
| 344 | H | 57 | S  | Val( 1S) | 0.79381 | 0.06715   |
| 345 | H | 57 | S  | Ryd( 2S) | 0.00128 | 0.74376   |
| 346 | H | 58 | S  | Val( 1S) | 0.81631 | 0.04570   |
| 347 | H | 58 | S  | Ryd( 2S) | 0.00155 | 0.88304   |
| 348 | C | 59 | S  | Cor( 1S) | 1.99918 | -10.11448 |
| 349 | C | 59 | S  | Val( 2S) | 1.01244 | -0.22964  |
| 350 | C | 59 | S  | Ryd( 3S) | 0.00045 | 1.03862   |
| 351 | C | 59 | px | Val( 2p) | 1.21585 | -0.15189  |
| 352 | C | 59 | px | Ryd( 3p) | 0.00292 | 0.21337   |
| 353 | C | 59 | py | Val( 2p) | 1.24878 | -0.14784  |
| 354 | C | 59 | py | Ryd( 3p) | 0.00212 | 0.19897   |
| 355 | C | 59 | pz | Val( 2p) | 1.10229 | -0.17624  |
| 356 | C | 59 | pz | Ryd( 3p) | 0.00313 | 0.19331   |
| 357 | H | 60 | S  | Val( 1S) | 0.80430 | 0.05717   |
| 358 | H | 60 | S  | Ryd( 2S) | 0.00122 | 0.79814   |
| 359 | H | 61 | S  | Val( 1S) | 0.79019 | 0.07466   |
| 360 | H | 61 | S  | Ryd( 2S) | 0.00115 | 0.77483   |
| 361 | H | 62 | S  | Val( 1S) | 0.79736 | 0.06731   |
| 362 | H | 62 | S  | Ryd( 2S) | 0.00162 | 0.74359   |
| 363 | H | 63 | S  | Val( 1S) | 0.80495 | 0.07443   |
| 364 | H | 63 | S  | Ryd( 2S) | 0.00166 | 0.90368   |
| 365 | H | 64 | S  | Val( 1S) | 0.81429 | 0.09900   |
| 366 | H | 64 | S  | Ryd( 2S) | 0.00185 | 0.85226   |
| 367 | H | 65 | S  | Val( 1S) | 0.89645 | 0.25763   |

|     |   |    |    |          |         |           |
|-----|---|----|----|----------|---------|-----------|
| 368 | H | 65 | S  | Ryd( 2S) | 0.00241 | 0.76964   |
| 369 | H | 66 | S  | Val( 1S) | 0.81647 | 0.08335   |
| 370 | H | 66 | S  | Ryd( 2S) | 0.00212 | 0.94052   |
| 371 | H | 67 | S  | Val( 1S) | 0.83099 | 0.12041   |
| 372 | H | 67 | S  | Ryd( 2S) | 0.00311 | 0.84525   |
| 373 | H | 68 | S  | Val( 1S) | 0.84688 | 0.18262   |
| 374 | H | 68 | S  | Ryd( 2S) | 0.00229 | 0.84793   |
| 375 | H | 69 | S  | Val( 1S) | 0.80599 | 0.10969   |
| 376 | H | 69 | S  | Ryd( 2S) | 0.00185 | 0.82832   |
| 377 | H | 70 | S  | Val( 1S) | 0.85944 | 0.19019   |
| 378 | H | 70 | S  | Ryd( 2S) | 0.00164 | 0.78101   |
| 379 | H | 71 | S  | Val( 1S) | 0.83028 | 0.10282   |
| 380 | H | 71 | S  | Ryd( 2S) | 0.00200 | 0.97501   |
| 381 | H | 72 | S  | Val( 1S) | 0.81233 | 0.07566   |
| 382 | H | 72 | S  | Ryd( 2S) | 0.00270 | 0.84079   |
| 383 | H | 73 | S  | Val( 1S) | 0.81006 | 0.09647   |
| 384 | H | 73 | S  | Ryd( 2S) | 0.00168 | 0.85884   |
| 385 | H | 74 | S  | Val( 1S) | 0.82548 | 0.14707   |
| 386 | H | 74 | S  | Ryd( 2S) | 0.00186 | 0.80068   |
| 387 | H | 75 | S  | Val( 1S) | 0.81182 | 0.08994   |
| 388 | H | 75 | S  | Ryd( 2S) | 0.00156 | 0.85032   |
| 389 | H | 76 | S  | Val( 1S) | 0.82243 | 0.09643   |
| 390 | H | 76 | S  | Ryd( 2S) | 0.00180 | 0.91401   |
| 391 | H | 77 | S  | Val( 1S) | 0.81487 | 0.04036   |
| 392 | H | 77 | S  | Ryd( 2S) | 0.00262 | 0.92009   |
| 393 | N | 78 | S  | Cor( 1S) | 1.99934 | -14.33068 |
| 394 | N | 78 | S  | Val( 2S) | 1.35143 | -0.70496  |
| 395 | N | 78 | S  | Ryd( 3S) | 0.00213 | 1.60489   |
| 396 | N | 78 | px | Val( 2p) | 1.27342 | -0.38750  |
| 397 | N | 78 | px | Ryd( 3p) | 0.00533 | 0.81598   |
| 398 | N | 78 | py | Val( 2p) | 1.36611 | -0.39498  |
| 399 | N | 78 | py | Ryd( 3p) | 0.00586 | 0.62585   |
| 400 | N | 78 | pz | Val( 2p) | 1.57635 | -0.42712  |
| 401 | N | 78 | pz | Ryd( 3p) | 0.01112 | 0.58931   |
| 402 | N | 79 | S  | Cor( 1S) | 1.99936 | -14.32591 |
| 403 | N | 79 | S  | Val( 2S) | 1.36040 | -0.70670  |
| 404 | N | 79 | S  | Ryd( 3S) | 0.00225 | 1.61380   |
| 405 | N | 79 | px | Val( 2p) | 1.67828 | -0.43229  |
| 406 | N | 79 | px | Ryd( 3p) | 0.01074 | 0.58684   |
| 407 | N | 79 | py | Val( 2p) | 1.28212 | -0.38468  |
| 408 | N | 79 | py | Ryd( 3p) | 0.00716 | 0.76562   |
| 409 | N | 79 | pz | Val( 2p) | 1.27148 | -0.38490  |
| 410 | N | 79 | pz | Ryd( 3p) | 0.00403 | 0.70625   |
| 411 | N | 80 | S  | Cor( 1S) | 1.99932 | -14.32952 |
| 412 | N | 80 | S  | Val( 2S) | 1.34865 | -0.70525  |
| 413 | N | 80 | S  | Ryd( 3S) | 0.00234 | 1.60373   |
| 414 | N | 80 | px | Val( 2p) | 1.28046 | -0.39229  |



|     |    |    |       |          |         |           |
|-----|----|----|-------|----------|---------|-----------|
| 415 | N  | 80 | px    | Ryd( 3p) | 0.00570 | 0.65387   |
| 416 | N  | 80 | py    | Val( 2p) | 1.55221 | -0.40797  |
| 417 | N  | 80 | py    | Ryd( 3p) | 0.01127 | 0.78230   |
| 418 | N  | 80 | pz    | Val( 2p) | 1.40781 | -0.41882  |
| 419 | N  | 80 | pz    | Ryd( 3p) | 0.00628 | 0.64215   |
|     |    |    |       |          |         |           |
| 420 | Tl | 81 | S     | Val( 6S) | 1.85744 | -0.44078  |
| 421 | Tl | 81 | S     | Ryd( 7S) | 0.00024 | 10.05804  |
| 422 | Tl | 81 | px    | Val( 6p) | 0.16466 | 0.18917   |
| 423 | Tl | 81 | px    | Ryd( 7p) | 0.00725 | 0.55856   |
| 424 | Tl | 81 | py    | Val( 6p) | 0.06333 | -0.04354  |
| 425 | Tl | 81 | py    | Ryd( 7p) | 0.00370 | 0.26373   |
| 426 | Tl | 81 | pz    | Val( 6p) | 0.08944 | 0.01155   |
| 427 | Tl | 81 | pz    | Ryd( 7p) | 0.00549 | 0.39030   |
| 428 | Tl | 81 | dxy   | Cor( 5d) | 1.99618 | -0.88539  |
| 429 | Tl | 81 | dxy   | Ryd( 6d) | 0.00014 | 1.46576   |
| 430 | Tl | 81 | dxz   | Cor( 5d) | 1.99654 | -0.88393  |
| 431 | Tl | 81 | dxz   | Ryd( 6d) | 0.00012 | 1.45910   |
| 432 | Tl | 81 | dyz   | Cor( 5d) | 1.99787 | -0.88448  |
| 433 | Tl | 81 | dyz   | Ryd( 6d) | 0.00013 | 1.40965   |
| 434 | Tl | 81 | dx2y2 | Cor( 5d) | 1.99769 | -0.88718  |
| 435 | Tl | 81 | dx2y2 | Ryd( 6d) | 0.00008 | 1.35619   |
| 436 | Tl | 81 | dz2   | Cor( 5d) | 1.99698 | -0.88292  |
| 437 | Tl | 81 | dz2   | Ryd( 6d) | 0.00018 | 1.47586   |
|     |    |    |       |          |         |           |
| 438 | Tl | 82 | S     | Val( 6S) | 1.85753 | -0.44080  |
| 439 | Tl | 82 | S     | Ryd( 7S) | 0.00024 | 10.05808  |
| 440 | Tl | 82 | px    | Val( 6p) | 0.16467 | 0.18921   |
| 441 | Tl | 82 | px    | Ryd( 7p) | 0.00725 | 0.55867   |
| 442 | Tl | 82 | py    | Val( 6p) | 0.06334 | -0.04355  |
| 443 | Tl | 82 | py    | Ryd( 7p) | 0.00370 | 0.26373   |
| 444 | Tl | 82 | pz    | Val( 6p) | 0.08945 | 0.01158   |
| 445 | Tl | 82 | pz    | Ryd( 7p) | 0.00549 | 0.39023   |
| 446 | Tl | 82 | dxy   | Cor( 5d) | 1.99618 | -0.88540  |
| 447 | Tl | 82 | dxy   | Ryd( 6d) | 0.00014 | 1.46578   |
| 448 | Tl | 82 | dxz   | Cor( 5d) | 1.99655 | -0.88394  |
| 449 | Tl | 82 | dxz   | Ryd( 6d) | 0.00012 | 1.45904   |
| 450 | Tl | 82 | dyz   | Cor( 5d) | 1.99787 | -0.88449  |
| 451 | Tl | 82 | dyz   | Ryd( 6d) | 0.00013 | 1.40962   |
| 452 | Tl | 82 | dx2y2 | Cor( 5d) | 1.99769 | -0.88719  |
| 453 | Tl | 82 | dx2y2 | Ryd( 6d) | 0.00008 | 1.35624   |
| 454 | Tl | 82 | dz2   | Cor( 5d) | 1.99698 | -0.88293  |
| 455 | Tl | 82 | dz2   | Ryd( 6d) | 0.00018 | 1.47588   |
|     |    |    |       |          |         |           |
| 456 | C  | 83 | S     | Cor( 1S) | 1.99873 | -10.25755 |
| 457 | C  | 83 | S     | Val( 2S) | 0.84209 | -0.27528  |
| 458 | C  | 83 | S     | Ryd( 3S) | 0.00198 | 1.07011   |
| 459 | C  | 83 | px    | Val( 2p) | 0.89430 | -0.20227  |
| 460 | C  | 83 | px    | Ryd( 3p) | 0.01412 | 0.57306   |
| 461 | C  | 83 | py    | Val( 2p) | 1.07306 | -0.21661  |
| 462 | C  | 83 | py    | Ryd( 3p) | 0.00510 | 0.43338   |
| 463 | C  | 83 | pz    | Val( 2p) | 1.03118 | -0.27441  |
| 464 | C  | 83 | pz    | Ryd( 3p) | 0.00801 | 0.35060   |
|     |    |    |       |          |         |           |
| 465 | C  | 84 | S     | Cor( 1S) | 1.99891 | -10.22236 |
| 466 | C  | 84 | S     | Val( 2S) | 0.89121 | -0.28185  |
| 467 | C  | 84 | S     | Ryd( 3S) | 0.00175 | 1.12663   |
| 468 | C  | 84 | px    | Val( 2p) | 1.06189 | -0.20169  |
| 469 | C  | 84 | px    | Ryd( 3p) | 0.00743 | 0.48020   |
| 470 | C  | 84 | py    | Val( 2p) | 1.06123 | -0.21041  |
| 471 | C  | 84 | py    | Ryd( 3p) | 0.00958 | 0.58681   |
| 472 | C  | 84 | pz    | Val( 2p) | 0.98444 | -0.25343  |

|     |   |    |    |          |         |           |
|-----|---|----|----|----------|---------|-----------|
| 473 | C | 84 | pz | Ryd( 3p) | 0.00685 | 0.39913   |
| 474 | C | 85 | S  | Cor( 1S) | 1.99906 | -10.19629 |
| 475 | C | 85 | S  | Val( 2S) | 0.93745 | -0.27265  |
| 476 | C | 85 | S  | Ryd( 3S) | 0.00130 | 1.02666   |
| 477 | C | 85 | px | Val( 2p) | 1.10928 | -0.16740  |
| 478 | C | 85 | px | Ryd( 3p) | 0.00641 | 0.38469   |
| 479 | C | 85 | py | Val( 2p) | 1.11083 | -0.16788  |
| 480 | C | 85 | py | Ryd( 3p) | 0.00448 | 0.46245   |
| 481 | C | 85 | pz | Val( 2p) | 1.00023 | -0.25691  |
| 482 | C | 85 | pz | Ryd( 3p) | 0.00351 | 0.27209   |
| 483 | C | 86 | S  | Cor( 1S) | 1.99917 | -10.19598 |
| 484 | C | 86 | S  | Val( 2S) | 0.93831 | -0.25985  |
| 485 | C | 86 | S  | Ryd( 3S) | 0.00150 | 0.95057   |
| 486 | C | 86 | px | Val( 2p) | 1.15915 | -0.10798  |
| 487 | C | 86 | px | Ryd( 3p) | 0.00685 | 0.43546   |
| 488 | C | 86 | py | Val( 2p) | 1.04953 | -0.18525  |
| 489 | C | 86 | py | Ryd( 3p) | 0.00382 | 0.34432   |
| 490 | C | 86 | pz | Val( 2p) | 1.00320 | -0.25673  |
| 491 | C | 86 | pz | Ryd( 3p) | 0.00372 | 0.28239   |
| 492 | C | 87 | S  | Cor( 1S) | 1.99858 | -10.15230 |
| 493 | C | 87 | S  | Val( 2S) | 0.87394 | -0.11863  |
| 494 | C | 87 | S  | Ryd( 3S) | 0.00108 | 0.96434   |
| 495 | C | 87 | px | Val( 2p) | 1.06279 | -0.17854  |
| 496 | C | 87 | px | Ryd( 3p) | 0.00403 | 0.42785   |
| 497 | C | 87 | py | Val( 2p) | 1.12700 | -0.01156  |
| 498 | C | 87 | py | Ryd( 3p) | 0.00713 | 0.33730   |
| 499 | C | 87 | pz | Val( 2p) | 0.99868 | -0.25357  |
| 500 | C | 87 | pz | Ryd( 3p) | 0.00405 | 0.33473   |
| 501 | C | 88 | S  | Cor( 1S) | 1.99904 | -10.19689 |
| 502 | C | 88 | S  | Val( 2S) | 0.92823 | -0.26051  |
| 503 | C | 88 | S  | Ryd( 3S) | 0.00138 | 1.08470   |
| 504 | C | 88 | px | Val( 2p) | 1.10023 | -0.17269  |
| 505 | C | 88 | px | Ryd( 3p) | 0.00520 | 0.48597   |
| 506 | C | 88 | py | Val( 2p) | 1.10399 | -0.17477  |
| 507 | C | 88 | py | Ryd( 3p) | 0.00724 | 0.37208   |
| 508 | C | 88 | pz | Val( 2p) | 1.04827 | -0.25585  |
| 509 | C | 88 | pz | Ryd( 3p) | 0.00395 | 0.36803   |
| 510 | C | 89 | S  | Cor( 1S) | 1.99882 | -10.23425 |
| 511 | C | 89 | S  | Val( 2S) | 0.96073 | -0.35906  |
| 512 | C | 89 | S  | Ryd( 3S) | 0.00112 | 1.35468   |
| 513 | C | 89 | px | Val( 2p) | 1.12006 | -0.26089  |
| 514 | C | 89 | px | Ryd( 3p) | 0.01055 | 0.39269   |
| 515 | C | 89 | py | Val( 2p) | 1.07303 | -0.28127  |
| 516 | C | 89 | py | Ryd( 3p) | 0.00594 | 0.34303   |
| 517 | C | 89 | pz | Val( 2p) | 1.15122 | -0.24995  |
| 518 | C | 89 | pz | Ryd( 3p) | 0.01368 | 0.41420   |
| 519 | H | 90 | S  | Val( 1S) | 0.77074 | 0.01322   |
| 520 | H | 90 | S  | Ryd( 2S) | 0.00188 | 0.89791   |
| 521 | C | 91 | S  | Cor( 1S) | 1.99900 | -10.30734 |
| 522 | C | 91 | S  | Val( 2S) | 0.85553 | -0.32327  |
| 523 | C | 91 | S  | Ryd( 3S) | 0.00475 | 0.94721   |
| 524 | C | 91 | px | Val( 2p) | 0.91513 | -0.20595  |
| 525 | C | 91 | px | Ryd( 3p) | 0.00700 | 0.45230   |
| 526 | C | 91 | py | Val( 2p) | 0.84216 | -0.27678  |
| 527 | C | 91 | py | Ryd( 3p) | 0.00799 | 0.35842   |

|     |   |     |    |          |         |           |
|-----|---|-----|----|----------|---------|-----------|
| 528 | C | 91  | pz | Val( 2p) | 0.92107 | -0.23311  |
| 529 | C | 91  | pz | Ryd( 3p) | 0.00677 | 0.41277   |
| 530 | C | 92  | S  | Cor( 1S) | 1.99907 | -10.16149 |
| 531 | C | 92  | S  | Val( 2S) | 1.02359 | -0.29153  |
| 532 | C | 92  | S  | Ryd( 3S) | 0.00053 | 1.05528   |
| 533 | C | 92  | px | Val( 2p) | 1.26716 | -0.20660  |
| 534 | C | 92  | px | Ryd( 3p) | 0.00260 | 0.15974   |
| 535 | C | 92  | py | Val( 2p) | 1.20851 | -0.21477  |
| 536 | C | 92  | py | Ryd( 3p) | 0.00201 | 0.18325   |
| 537 | C | 92  | pz | Val( 2p) | 1.13485 | -0.23226  |
| 538 | C | 92  | pz | Ryd( 3p) | 0.00351 | 0.16820   |
| 539 | H | 93  | S  | Val( 1S) | 0.77348 | 0.03100   |
| 540 | H | 93  | S  | Ryd( 2S) | 0.00144 | 0.81483   |
| 541 | H | 94  | S  | Val( 1S) | 0.76875 | 0.02302   |
| 542 | H | 94  | S  | Ryd( 2S) | 0.00102 | 0.74572   |
| 543 | H | 95  | S  | Val( 1S) | 0.77045 | 0.01954   |
| 544 | H | 95  | S  | Ryd( 2S) | 0.00101 | 0.75255   |
| 545 | C | 96  | S  | Cor( 1S) | 1.99896 | -10.17764 |
| 546 | C | 96  | S  | Val( 2S) | 0.91799 | -0.24298  |
| 547 | C | 96  | S  | Ryd( 3S) | 0.00053 | 1.36676   |
| 548 | C | 96  | px | Val( 2p) | 1.14093 | -0.13967  |
| 549 | C | 96  | px | Ryd( 3p) | 0.00867 | 0.33981   |
| 550 | C | 96  | py | Val( 2p) | 1.01715 | -0.19792  |
| 551 | C | 96  | py | Ryd( 3p) | 0.00434 | 0.33816   |
| 552 | C | 96  | pz | Val( 2p) | 1.04571 | -0.18587  |
| 553 | C | 96  | pz | Ryd( 3p) | 0.00315 | 0.39386   |
| 554 | C | 97  | S  | Cor( 1S) | 1.99918 | -10.11970 |
| 555 | C | 97  | S  | Val( 2S) | 1.01145 | -0.23272  |
| 556 | C | 97  | S  | Ryd( 3S) | 0.00051 | 1.02951   |
| 557 | C | 97  | px | Val( 2p) | 1.24287 | -0.15560  |
| 558 | C | 97  | px | Ryd( 3p) | 0.00248 | 0.16005   |
| 559 | C | 97  | py | Val( 2p) | 1.23538 | -0.15373  |
| 560 | C | 97  | py | Ryd( 3p) | 0.00279 | 0.20108   |
| 561 | C | 97  | pz | Val( 2p) | 1.07776 | -0.18477  |
| 562 | C | 97  | pz | Ryd( 3p) | 0.00290 | 0.18913   |
| 563 | H | 98  | S  | Val( 1S) | 0.79820 | 0.05812   |
| 564 | H | 98  | S  | Ryd( 2S) | 0.00151 | 0.75051   |
| 565 | H | 99  | S  | Val( 1S) | 0.79391 | 0.06430   |
| 566 | H | 99  | S  | Ryd( 2S) | 0.00122 | 0.74169   |
| 567 | H | 100 | S  | Val( 1S) | 0.80368 | 0.05417   |
| 568 | H | 100 | S  | Ryd( 2S) | 0.00128 | 0.78147   |
| 569 | C | 101 | S  | Cor( 1S) | 1.99921 | -10.11945 |
| 570 | C | 101 | S  | Val( 2S) | 1.00366 | -0.22634  |
| 571 | C | 101 | S  | Ryd( 3S) | 0.00045 | 1.06644   |
| 572 | C | 101 | px | Val( 2p) | 1.19644 | -0.16836  |
| 573 | C | 101 | px | Ryd( 3p) | 0.00229 | 0.29822   |
| 574 | C | 101 | py | Val( 2p) | 1.16473 | -0.17379  |
| 575 | C | 101 | py | Ryd( 3p) | 0.00317 | 0.29128   |
| 576 | C | 101 | pz | Val( 2p) | 1.19905 | -0.16187  |
| 577 | C | 101 | pz | Ryd( 3p) | 0.00324 | 0.26425   |
| 578 | H | 102 | S  | Val( 1S) | 0.81153 | 0.04487   |

|     |   |     |    |          |         |           |
|-----|---|-----|----|----------|---------|-----------|
| 579 | H | 102 | S  | Ryd( 2S) | 0.00145 | 0.91487   |
| 580 | H | 103 | S  | Val( 1S) | 0.79304 | 0.06411   |
| 581 | H | 103 | S  | Ryd( 2S) | 0.00128 | 0.79275   |
| 582 | H | 104 | S  | Val( 1S) | 0.80335 | 0.04938   |
| 583 | H | 104 | S  | Ryd( 2S) | 0.00180 | 0.86514   |
| 584 | C | 105 | S  | Cor( 1S) | 1.99899 | -10.30463 |
| 585 | C | 105 | S  | Val( 2S) | 0.85632 | -0.32304  |
| 586 | C | 105 | S  | Ryd( 3S) | 0.00495 | 0.98205   |
| 587 | C | 105 | px | Val( 2p) | 0.94982 | -0.20687  |
| 588 | C | 105 | px | Ryd( 3p) | 0.00705 | 0.44203   |
| 589 | C | 105 | py | Val( 2p) | 0.87013 | -0.25259  |
| 590 | C | 105 | py | Ryd( 3p) | 0.00899 | 0.38653   |
| 591 | C | 105 | pz | Val( 2p) | 0.85917 | -0.25120  |
| 592 | C | 105 | pz | Ryd( 3p) | 0.00640 | 0.38851   |
| 593 | C | 106 | S  | Cor( 1S) | 1.99907 | -10.15638 |
| 594 | C | 106 | S  | Val( 2S) | 1.02100 | -0.28574  |
| 595 | C | 106 | S  | Ryd( 3S) | 0.00055 | 1.08197   |
| 596 | C | 106 | px | Val( 2p) | 1.10160 | -0.23796  |
| 597 | C | 106 | px | Ryd( 3p) | 0.00412 | 0.15602   |
| 598 | C | 106 | py | Val( 2p) | 1.25336 | -0.20419  |
| 599 | C | 106 | py | Ryd( 3p) | 0.00213 | 0.16076   |
| 600 | C | 106 | pz | Val( 2p) | 1.25978 | -0.20334  |
| 601 | C | 106 | pz | Ryd( 3p) | 0.00218 | 0.20360   |
| 602 | H | 107 | S  | Val( 1S) | 0.76945 | 0.03791   |
| 603 | H | 107 | S  | Ryd( 2S) | 0.00130 | 0.82303   |
| 604 | H | 108 | S  | Val( 1S) | 0.76795 | 0.02955   |
| 605 | H | 108 | S  | Ryd( 2S) | 0.00108 | 0.75417   |
| 606 | H | 109 | S  | Val( 1S) | 0.77231 | 0.01690   |
| 607 | H | 109 | S  | Ryd( 2S) | 0.00117 | 0.81740   |
| 608 | C | 110 | S  | Cor( 1S) | 1.99877 | -10.24339 |
| 609 | C | 110 | S  | Val( 2S) | 0.84438 | -0.26301  |
| 610 | C | 110 | S  | Ryd( 3S) | 0.00207 | 1.04583   |
| 611 | C | 110 | px | Val( 2p) | 1.04373 | -0.25195  |
| 612 | C | 110 | px | Ryd( 3p) | 0.00667 | 0.40467   |
| 613 | C | 110 | py | Val( 2p) | 1.00600 | -0.19703  |
| 614 | C | 110 | py | Ryd( 3p) | 0.00718 | 0.51731   |
| 615 | C | 110 | pz | Val( 2p) | 0.95597 | -0.20327  |
| 616 | C | 110 | pz | Ryd( 3p) | 0.01041 | 0.52894   |
| 617 | C | 111 | S  | Cor( 1S) | 1.99899 | -10.21059 |
| 618 | C | 111 | S  | Val( 2S) | 0.89193 | -0.26732  |
| 619 | C | 111 | S  | Ryd( 3S) | 0.00140 | 1.11363   |
| 620 | C | 111 | px | Val( 2p) | 0.99416 | -0.22964  |
| 621 | C | 111 | px | Ryd( 3p) | 0.00763 | 0.42590   |
| 622 | C | 111 | py | Val( 2p) | 1.04396 | -0.18434  |
| 623 | C | 111 | py | Ryd( 3p) | 0.00654 | 0.48151   |
| 624 | C | 111 | pz | Val( 2p) | 1.03891 | -0.19867  |
| 625 | C | 111 | pz | Ryd( 3p) | 0.00844 | 0.52943   |
| 626 | C | 112 | S  | Cor( 1S) | 1.99889 | -10.15219 |
| 627 | C | 112 | S  | Val( 2S) | 0.89454 | -0.16865  |
| 628 | C | 112 | S  | Ryd( 3S) | 0.00093 | 0.97792   |
| 629 | C | 112 | px | Val( 2p) | 1.02185 | -0.20484  |
| 630 | C | 112 | px | Ryd( 3p) | 0.00252 | 0.32441   |

|     |   |     |    |          |         |           |
|-----|---|-----|----|----------|---------|-----------|
| 631 | C | 112 | py | Val( 2p) | 1.14828 | -0.08255  |
| 632 | C | 112 | py | Ryd( 3p) | 0.00768 | 0.26735   |
| 633 | C | 112 | pz | Val( 2p) | 1.06626 | -0.18197  |
| 634 | C | 112 | pz | Ryd( 3p) | 0.00297 | 0.45096   |
| 635 | C | 113 | S  | Cor( 1S) | 1.99921 | -10.17717 |
| 636 | C | 113 | S  | Val( 2S) | 0.93334 | -0.23020  |
| 637 | C | 113 | S  | Ryd( 3S) | 0.00089 | 0.89777   |
| 638 | C | 113 | px | Val( 2p) | 1.00629 | -0.21900  |
| 639 | C | 113 | px | Ryd( 3p) | 0.00298 | 0.27508   |
| 640 | C | 113 | py | Val( 2p) | 1.08351 | -0.15642  |
| 641 | C | 113 | py | Ryd( 3p) | 0.00455 | 0.30984   |
| 642 | C | 113 | pz | Val( 2p) | 1.12364 | -0.11033  |
| 643 | C | 113 | pz | Ryd( 3p) | 0.00541 | 0.34437   |
| 644 | C | 114 | S  | Cor( 1S) | 1.99905 | -10.16404 |
| 645 | C | 114 | S  | Val( 2S) | 0.91232 | -0.18538  |
| 646 | C | 114 | S  | Ryd( 3S) | 0.00075 | 0.89412   |
| 647 | C | 114 | px | Val( 2p) | 1.02131 | -0.20661  |
| 648 | C | 114 | px | Ryd( 3p) | 0.00402 | 0.26096   |
| 649 | C | 114 | py | Val( 2p) | 1.06133 | -0.15004  |
| 650 | C | 114 | py | Ryd( 3p) | 0.00343 | 0.35297   |
| 651 | C | 114 | pz | Val( 2p) | 1.09808 | -0.10102  |
| 652 | C | 114 | pz | Ryd( 3p) | 0.00569 | 0.29200   |
| 653 | C | 115 | S  | Cor( 1S) | 1.99907 | -10.17879 |
| 654 | C | 115 | S  | Val( 2S) | 0.92144 | -0.23670  |
| 655 | C | 115 | S  | Ryd( 3S) | 0.00121 | 1.01643   |
| 656 | C | 115 | px | Val( 2p) | 1.04288 | -0.24337  |
| 657 | C | 115 | px | Ryd( 3p) | 0.00442 | 0.31804   |
| 658 | C | 115 | py | Val( 2p) | 1.15839 | -0.11229  |
| 659 | C | 115 | py | Ryd( 3p) | 0.00683 | 0.51600   |
| 660 | C | 115 | pz | Val( 2p) | 1.07145 | -0.20603  |
| 661 | C | 115 | pz | Ryd( 3p) | 0.00466 | 0.44134   |
| 662 | C | 116 | S  | Cor( 1S) | 1.99912 | -10.18966 |
| 663 | C | 116 | S  | Val( 2S) | 0.94573 | -0.28347  |
| 664 | C | 116 | S  | Ryd( 3S) | 0.00052 | 1.35511   |
| 665 | C | 116 | px | Val( 2p) | 1.00824 | -0.19880  |
| 666 | C | 116 | px | Ryd( 3p) | 0.00272 | 0.31799   |
| 667 | C | 116 | py | Val( 2p) | 1.08852 | -0.18187  |
| 668 | C | 116 | py | Ryd( 3p) | 0.00735 | 0.45113   |
| 669 | C | 116 | pz | Val( 2p) | 1.10033 | -0.16167  |
| 670 | C | 116 | pz | Ryd( 3p) | 0.00586 | 0.27538   |
| 671 | C | 117 | S  | Cor( 1S) | 1.99917 | -10.11236 |
| 672 | C | 117 | S  | Val( 2S) | 1.01304 | -0.22704  |
| 673 | C | 117 | S  | Ryd( 3S) | 0.00041 | 1.02006   |
| 674 | C | 117 | px | Val( 2p) | 1.22940 | -0.14776  |
| 675 | C | 117 | px | Ryd( 3p) | 0.00294 | 0.20060   |
| 676 | C | 117 | py | Val( 2p) | 1.10376 | -0.17056  |
| 677 | C | 117 | py | Ryd( 3p) | 0.00269 | 0.18615   |
| 678 | C | 117 | pz | Val( 2p) | 1.22100 | -0.15117  |
| 679 | C | 117 | pz | Ryd( 3p) | 0.00248 | 0.18057   |
| 680 | H | 118 | S  | Val( 1S) | 0.80577 | 0.05823   |
| 681 | H | 118 | S  | Ryd( 2S) | 0.00141 | 0.77774   |
| 682 | H | 119 | S  | Val( 1S) | 0.79525 | 0.07111   |
| 683 | H | 119 | S  | Ryd( 2S) | 0.00125 | 0.75162   |
| 684 | H | 120 | S  | Val( 1S) | 0.79428 | 0.07460   |

|     |   |     |    |          |         |           |
|-----|---|-----|----|----------|---------|-----------|
| 685 | H | 120 | S  | Ryd( 2S) | 0.00119 | 0.74297   |
| 686 | C | 121 | S  | Cor( 1S) | 1.99918 | -10.12824 |
| 687 | C | 121 | S  | Val( 2S) | 1.01080 | -0.23846  |
| 688 | C | 121 | S  | Ryd( 3S) | 0.00051 | 1.02935   |
| 689 | C | 121 | px | Val( 2p) | 1.09598 | -0.19697  |
| 690 | C | 121 | px | Ryd( 3p) | 0.00379 | 0.37977   |
| 691 | C | 121 | py | Val( 2p) | 1.22860 | -0.15976  |
| 692 | C | 121 | py | Ryd( 3p) | 0.00292 | 0.22826   |
| 693 | C | 121 | pz | Val( 2p) | 1.23559 | -0.16167  |
| 694 | C | 121 | pz | Ryd( 3p) | 0.00227 | 0.32096   |
| 695 | H | 122 | S  | Val( 1S) | 0.81582 | 0.03857   |
| 696 | H | 122 | S  | Ryd( 2S) | 0.00150 | 0.89134   |
| 697 | H | 123 | S  | Val( 1S) | 0.79484 | 0.05664   |
| 698 | H | 123 | S  | Ryd( 2S) | 0.00138 | 0.77940   |
| 699 | H | 124 | S  | Val( 1S) | 0.79961 | 0.05439   |
| 700 | H | 124 | S  | Ryd( 2S) | 0.00150 | 0.79944   |
| 701 | C | 125 | S  | Cor( 1S) | 1.99898 | -10.30600 |
| 702 | C | 125 | S  | Val( 2S) | 0.85423 | -0.32197  |
| 703 | C | 125 | S  | Ryd( 3S) | 0.00487 | 0.95177   |
| 704 | C | 125 | px | Val( 2p) | 0.80822 | -0.29298  |
| 705 | C | 125 | px | Ryd( 3p) | 0.00761 | 0.34579   |
| 706 | C | 125 | py | Val( 2p) | 0.98589 | -0.24258  |
| 707 | C | 125 | py | Ryd( 3p) | 0.00631 | 0.49833   |
| 708 | C | 125 | pz | Val( 2p) | 0.88403 | -0.18051  |
| 709 | C | 125 | pz | Ryd( 3p) | 0.00801 | 0.42286   |
| 710 | C | 126 | S  | Cor( 1S) | 1.99907 | -10.16063 |
| 711 | C | 126 | S  | Val( 2S) | 1.02271 | -0.29038  |
| 712 | C | 126 | S  | Ryd( 3S) | 0.00054 | 1.06181   |
| 713 | C | 126 | px | Val( 2p) | 1.24258 | -0.20539  |
| 714 | C | 126 | px | Ryd( 3p) | 0.00149 | 0.21609   |
| 715 | C | 126 | py | Val( 2p) | 1.16521 | -0.22721  |
| 716 | C | 126 | py | Ryd( 3p) | 0.00379 | 0.18121   |
| 717 | C | 126 | pz | Val( 2p) | 1.20513 | -0.21973  |
| 718 | C | 126 | pz | Ryd( 3p) | 0.00276 | 0.13996   |
| 719 | H | 127 | S  | Val( 1S) | 0.77008 | 0.03430   |
| 720 | H | 127 | S  | Ryd( 2S) | 0.00126 | 0.80846   |
| 721 | H | 128 | S  | Val( 1S) | 0.77013 | 0.02665   |
| 722 | H | 128 | S  | Ryd( 2S) | 0.00100 | 0.75225   |
| 723 | H | 129 | S  | Val( 1S) | 0.77136 | 0.01835   |
| 724 | H | 129 | S  | Ryd( 2S) | 0.00103 | 0.78278   |
| 725 | C | 130 | S  | Cor( 1S) | 1.99878 | -10.25121 |
| 726 | C | 130 | S  | Val( 2S) | 0.84180 | -0.26772  |
| 727 | C | 130 | S  | Ryd( 3S) | 0.00210 | 1.06407   |
| 728 | C | 130 | px | Val( 2p) | 1.07886 | -0.22307  |
| 729 | C | 130 | px | Ryd( 3p) | 0.00510 | 0.43223   |
| 730 | C | 130 | py | Val( 2p) | 0.90484 | -0.20131  |
| 731 | C | 130 | py | Ryd( 3p) | 0.00771 | 0.48787   |
| 732 | C | 130 | pz | Val( 2p) | 1.01728 | -0.23848  |
| 733 | C | 130 | pz | Ryd( 3p) | 0.01076 | 0.55566   |
| 734 | C | 131 | S  | Cor( 1S) | 1.99897 | -10.21150 |
| 735 | C | 131 | S  | Val( 2S) | 0.89044 | -0.26738  |

|     |   |     |    |          |         |           |
|-----|---|-----|----|----------|---------|-----------|
| 736 | C | 131 | S  | Ryd( 3S) | 0.00140 | 1.11321   |
| 737 | C | 131 | px | Val( 2p) | 1.04110 | -0.20766  |
| 738 | C | 131 | px | Ryd( 3p) | 0.00825 | 0.57457   |
| 739 | C | 131 | py | Val( 2p) | 1.04246 | -0.20746  |
| 740 | C | 131 | py | Ryd( 3p) | 0.00685 | 0.45028   |
| 741 | C | 131 | pz | Val( 2p) | 1.02408 | -0.21422  |
| 742 | C | 131 | pz | Ryd( 3p) | 0.00695 | 0.42913   |
| 743 | C | 132 | S  | Cor( 1S) | 1.99907 | -10.17691 |
| 744 | C | 132 | S  | Val( 2S) | 0.93223 | -0.24315  |
| 745 | C | 132 | S  | Ryd( 3S) | 0.00099 | 0.97913   |
| 746 | C | 132 | px | Val( 2p) | 1.08867 | -0.17186  |
| 747 | C | 132 | px | Ryd( 3p) | 0.00422 | 0.36838   |
| 748 | C | 132 | py | Val( 2p) | 1.04237 | -0.19122  |
| 749 | C | 132 | py | Ryd( 3p) | 0.00362 | 0.34063   |
| 750 | C | 132 | pz | Val( 2p) | 1.08590 | -0.17181  |
| 751 | C | 132 | pz | Ryd( 3p) | 0.00545 | 0.28863   |
| 752 | C | 133 | S  | Cor( 1S) | 1.99914 | -10.16997 |
| 753 | C | 133 | S  | Val( 2S) | 0.92620 | -0.21725  |
| 754 | C | 133 | S  | Ryd( 3S) | 0.00073 | 0.88050   |
| 755 | C | 133 | px | Val( 2p) | 1.03671 | -0.18468  |
| 756 | C | 133 | px | Ryd( 3p) | 0.00293 | 0.31453   |
| 757 | C | 133 | py | Val( 2p) | 1.09696 | -0.14749  |
| 758 | C | 133 | py | Ryd( 3p) | 0.00566 | 0.26665   |
| 759 | C | 133 | pz | Val( 2p) | 1.07136 | -0.15504  |
| 760 | C | 133 | pz | Ryd( 3p) | 0.00413 | 0.28889   |
| 761 | C | 134 | S  | Cor( 1S) | 1.99921 | -10.18795 |
| 762 | C | 134 | S  | Val( 2S) | 0.93838 | -0.24833  |
| 763 | C | 134 | S  | Ryd( 3S) | 0.00084 | 0.89387   |
| 764 | C | 134 | px | Val( 2p) | 1.11384 | -0.15473  |
| 765 | C | 134 | px | Ryd( 3p) | 0.00645 | 0.41692   |
| 766 | C | 134 | py | Val( 2p) | 1.06983 | -0.16746  |
| 767 | C | 134 | py | Ryd( 3p) | 0.00438 | 0.29833   |
| 768 | C | 134 | pz | Val( 2p) | 1.02864 | -0.20626  |
| 769 | C | 134 | pz | Ryd( 3p) | 0.00327 | 0.29920   |
| 770 | C | 135 | S  | Cor( 1S) | 1.99906 | -10.18581 |
| 771 | C | 135 | S  | Val( 2S) | 0.92119 | -0.24349  |
| 772 | C | 135 | S  | Ryd( 3S) | 0.00128 | 1.02238   |
| 773 | C | 135 | px | Val( 2p) | 1.11277 | -0.17217  |
| 774 | C | 135 | px | Ryd( 3p) | 0.00641 | 0.40997   |
| 775 | C | 135 | py | Val( 2p) | 1.06102 | -0.21869  |
| 776 | C | 135 | py | Ryd( 3p) | 0.00416 | 0.40046   |
| 777 | C | 135 | pz | Val( 2p) | 1.10248 | -0.18765  |
| 778 | C | 135 | pz | Ryd( 3p) | 0.00492 | 0.39500   |
| 779 | C | 136 | S  | Cor( 1S) | 1.99916 | -10.19251 |
| 780 | C | 136 | S  | Val( 2S) | 0.95064 | -0.29294  |
| 781 | C | 136 | S  | Ryd( 3S) | 0.00052 | 1.37896   |
| 782 | C | 136 | px | Val( 2p) | 1.02514 | -0.19677  |
| 783 | C | 136 | px | Ryd( 3p) | 0.00392 | 0.36319   |
| 784 | C | 136 | py | Val( 2p) | 1.13817 | -0.15946  |
| 785 | C | 136 | py | Ryd( 3p) | 0.00680 | 0.30047   |
| 786 | C | 136 | pz | Val( 2p) | 1.02760 | -0.19661  |
| 787 | C | 136 | pz | Ryd( 3p) | 0.00446 | 0.43314   |
| 788 | C | 137 | S  | Cor( 1S) | 1.99916 | -10.11655 |
| 789 | C | 137 | S  | Val( 2S) | 1.01182 | -0.23047  |
| 790 | C | 137 | S  | Ryd( 3S) | 0.00050 | 1.04542   |
| 791 | C | 137 | px | Val( 2p) | 1.16129 | -0.16750  |

|     |   |     |    |          |         |           |
|-----|---|-----|----|----------|---------|-----------|
| 792 | C | 137 | px | Ryd( 3p) | 0.00285 | 0.19627   |
| 793 | C | 137 | py | Val( 2p) | 1.23890 | -0.15400  |
| 794 | C | 137 | py | Ryd( 3p) | 0.00209 | 0.21438   |
| 795 | C | 137 | pz | Val( 2p) | 1.15308 | -0.16382  |
| 796 | C | 137 | pz | Ryd( 3p) | 0.00324 | 0.21231   |
| 797 | H | 138 | S  | Val( 1S) | 0.79305 | 0.07274   |
| 798 | H | 138 | S  | Ryd( 2S) | 0.00159 | 0.76222   |
| 799 | H | 139 | S  | Val( 1S) | 0.79371 | 0.06656   |
| 800 | H | 139 | S  | Ryd( 2S) | 0.00128 | 0.74396   |
| 801 | H | 140 | S  | Val( 1S) | 0.81638 | 0.04616   |
| 802 | H | 140 | S  | Ryd( 2S) | 0.00156 | 0.88288   |
| 803 | C | 141 | S  | Cor( 1S) | 1.99917 | -10.11444 |
| 804 | C | 141 | S  | Val( 2S) | 1.01243 | -0.22948  |
| 805 | C | 141 | S  | Ryd( 3S) | 0.00045 | 1.03849   |
| 806 | C | 141 | px | Val( 2p) | 1.21578 | -0.15184  |
| 807 | C | 141 | px | Ryd( 3p) | 0.00291 | 0.21338   |
| 808 | C | 141 | py | Val( 2p) | 1.24877 | -0.14763  |
| 809 | C | 141 | py | Ryd( 3p) | 0.00211 | 0.19902   |
| 810 | C | 141 | pz | Val( 2p) | 1.10220 | -0.17625  |
| 811 | C | 141 | pz | Ryd( 3p) | 0.00313 | 0.19339   |
| 812 | H | 142 | S  | Val( 1S) | 0.80432 | 0.05714   |
| 813 | H | 142 | S  | Ryd( 2S) | 0.00122 | 0.79815   |
| 814 | H | 143 | S  | Val( 1S) | 0.79032 | 0.07518   |
| 815 | H | 143 | S  | Ryd( 2S) | 0.00115 | 0.77455   |
| 816 | H | 144 | S  | Val( 1S) | 0.79739 | 0.06731   |
| 817 | H | 144 | S  | Ryd( 2S) | 0.00161 | 0.74356   |
| 818 | H | 145 | S  | Val( 1S) | 0.80497 | 0.07443   |
| 819 | H | 145 | S  | Ryd( 2S) | 0.00166 | 0.90367   |
| 820 | H | 146 | S  | Val( 1S) | 0.81431 | 0.09901   |
| 821 | H | 146 | S  | Ryd( 2S) | 0.00185 | 0.85229   |
| 822 | H | 147 | S  | Val( 1S) | 0.89645 | 0.25767   |
| 823 | H | 147 | S  | Ryd( 2S) | 0.00241 | 0.76967   |
| 824 | H | 148 | S  | Val( 1S) | 0.81647 | 0.08338   |
| 825 | H | 148 | S  | Ryd( 2S) | 0.00212 | 0.94056   |
| 826 | H | 149 | S  | Val( 1S) | 0.83113 | 0.12044   |
| 827 | H | 149 | S  | Ryd( 2S) | 0.00310 | 0.84512   |
| 828 | H | 150 | S  | Val( 1S) | 0.84726 | 0.18329   |
| 829 | H | 150 | S  | Ryd( 2S) | 0.00229 | 0.84735   |
| 830 | H | 151 | S  | Val( 1S) | 0.80598 | 0.10966   |
| 831 | H | 151 | S  | Ryd( 2S) | 0.00185 | 0.82840   |
| 832 | H | 152 | S  | Val( 1S) | 0.85901 | 0.18964   |
| 833 | H | 152 | S  | Ryd( 2S) | 0.00165 | 0.78182   |
| 834 | H | 153 | S  | Val( 1S) | 0.83035 | 0.10282   |
| 835 | H | 153 | S  | Ryd( 2S) | 0.00200 | 0.97489   |
| 836 | H | 154 | S  | Val( 1S) | 0.81242 | 0.07570   |



|     |   |     |    |          |         |           |
|-----|---|-----|----|----------|---------|-----------|
| 837 | H | 154 | S  | Ryd( 2S) | 0.00270 | 0.84073   |
| 838 | H | 155 | S  | Val( 1S) | 0.80994 | 0.09609   |
| 839 | H | 155 | S  | Ryd( 2S) | 0.00167 | 0.85914   |
| 840 | H | 156 | S  | Val( 1S) | 0.82547 | 0.14733   |
| 841 | H | 156 | S  | Ryd( 2S) | 0.00187 | 0.80094   |
| 842 | H | 157 | S  | Val( 1S) | 0.81185 | 0.08992   |
| 843 | H | 157 | S  | Ryd( 2S) | 0.00156 | 0.85030   |
| 844 | H | 158 | S  | Val( 1S) | 0.82244 | 0.09645   |
| 845 | H | 158 | S  | Ryd( 2S) | 0.00180 | 0.91401   |
| 846 | H | 159 | S  | Val( 1S) | 0.81495 | 0.04083   |
| 847 | H | 159 | S  | Ryd( 2S) | 0.00262 | 0.91973   |
| 848 | N | 160 | S  | Cor( 1S) | 1.99934 | -14.33049 |
| 849 | N | 160 | S  | Val( 2S) | 1.35098 | -0.70465  |
| 850 | N | 160 | S  | Ryd( 3S) | 0.00213 | 1.60481   |
| 851 | N | 160 | px | Val( 2p) | 1.27354 | -0.38753  |
| 852 | N | 160 | px | Ryd( 3p) | 0.00533 | 0.81598   |
| 853 | N | 160 | py | Val( 2p) | 1.36594 | -0.39494  |
| 854 | N | 160 | py | Ryd( 3p) | 0.00587 | 0.62589   |
| 855 | N | 160 | pz | Val( 2p) | 1.57653 | -0.42713  |
| 856 | N | 160 | pz | Ryd( 3p) | 0.01114 | 0.58926   |
| 857 | N | 161 | S  | Cor( 1S) | 1.99936 | -14.32586 |
| 858 | N | 161 | S  | Val( 2S) | 1.36013 | -0.70648  |
| 859 | N | 161 | S  | Ryd( 3S) | 0.00225 | 1.61381   |
| 860 | N | 161 | px | Val( 2p) | 1.67830 | -0.43219  |
| 861 | N | 161 | px | Ryd( 3p) | 0.01074 | 0.58690   |
| 862 | N | 161 | py | Val( 2p) | 1.28220 | -0.38461  |
| 863 | N | 161 | py | Ryd( 3p) | 0.00716 | 0.76581   |
| 864 | N | 161 | pz | Val( 2p) | 1.27139 | -0.38481  |
| 865 | N | 161 | pz | Ryd( 3p) | 0.00403 | 0.70645   |
| 866 | N | 162 | S  | Cor( 1S) | 1.99932 | -14.32949 |
| 867 | N | 162 | S  | Val( 2S) | 1.34866 | -0.70518  |
| 868 | N | 162 | S  | Ryd( 3S) | 0.00234 | 1.60391   |
| 869 | N | 162 | px | Val( 2p) | 1.28046 | -0.39227  |
| 870 | N | 162 | px | Ryd( 3p) | 0.00570 | 0.65396   |
| 871 | N | 162 | py | Val( 2p) | 1.55219 | -0.40791  |
| 872 | N | 162 | py | Ryd( 3p) | 0.01127 | 0.78240   |
| 873 | N | 162 | pz | Val( 2p) | 1.40773 | -0.41874  |
| 874 | N | 162 | pz | Ryd( 3p) | 0.00628 | 0.64220   |

[136 electrons found in the effective core potential]

WARNING: 1 low occupancy (<1.9990e) core orbital found on C 1

- 1 low occupancy (<1.9990e) core orbital found on C 3
- 1 low occupancy (<1.9990e) core orbital found on C 8
- 1 low occupancy (<1.9990e) core orbital found on C 9
- 1 low occupancy (<1.9990e) core orbital found on C 12
- 1 low occupancy (<1.9990e) core orbital found on C 14
- 1 low occupancy (<1.9990e) core orbital found on C 23
- 1 low occupancy (<1.9990e) core orbital found on C 28
- 1 low occupancy (<1.9990e) core orbital found on C 29
- 1 low occupancy (<1.9990e) core orbital found on C 30
- 1 low occupancy (<1.9990e) core orbital found on C 43
- 1 low occupancy (<1.9990e) core orbital found on C 48
- 1 low occupancy (<1.9990e) core orbital found on C 49

5 low occupancy (<1.9990e) core orbitals found on Tl 81  
 5 low occupancy (<1.9990e) core orbitals found on Tl 82  
 1 low occupancy (<1.9990e) core orbital found on C 83  
 1 low occupancy (<1.9990e) core orbital found on C 84  
 1 low occupancy (<1.9990e) core orbital found on C 87  
 1 low occupancy (<1.9990e) core orbital found on C 89  
 1 low occupancy (<1.9990e) core orbital found on C 91  
 1 low occupancy (<1.9990e) core orbital found on C 96  
 1 low occupancy (<1.9990e) core orbital found on C 105  
 1 low occupancy (<1.9990e) core orbital found on C 110  
 1 low occupancy (<1.9990e) core orbital found on C 111  
 1 low occupancy (<1.9990e) core orbital found on C 112  
 1 low occupancy (<1.9990e) core orbital found on C 125  
 1 low occupancy (<1.9990e) core orbital found on C 130  
 1 low occupancy (<1.9990e) core orbital found on C 131

Summary of Natural Population Analysis:

| Natural Population |    |                |         |         |         |         |
|--------------------|----|----------------|---------|---------|---------|---------|
| Atom               | No | Natural Charge | Core    | Valence | Rydberg | Total   |
| C                  | 1  | -0.33502       | 1.99882 | 4.30493 | 0.03127 | 6.33502 |
| H                  | 2  | 0.22720        | 0.00000 | 0.77092 | 0.00188 | 0.77280 |
| C                  | 3  | 0.44075        | 1.99900 | 3.53377 | 0.02648 | 5.55925 |
| C                  | 4  | -0.64156       | 1.99907 | 4.63384 | 0.00864 | 6.64156 |
| H                  | 5  | 0.22507        | 0.00000 | 0.77349 | 0.00144 | 0.77493 |
| H                  | 6  | 0.23022        | 0.00000 | 0.76876 | 0.00102 | 0.76978 |
| H                  | 7  | 0.22837        | 0.00000 | 0.77062 | 0.00101 | 0.77163 |
| C                  | 8  | 0.13143        | 1.99873 | 3.84064 | 0.02921 | 5.86857 |
| C                  | 9  | -0.02319       | 1.99891 | 3.99865 | 0.02563 | 6.02319 |
| C                  | 10 | -0.17252       | 1.99906 | 4.15776 | 0.01570 | 6.17252 |
| C                  | 11 | -0.16526       | 1.99917 | 4.15019 | 0.01589 | 6.16526 |
| C                  | 12 | -0.07731       | 1.99858 | 4.06243 | 0.01630 | 6.07731 |
| C                  | 13 | -0.19756       | 1.99904 | 4.18074 | 0.01777 | 6.19756 |
| C                  | 14 | -0.13768       | 1.99896 | 4.12202 | 0.01670 | 6.13768 |
| C                  | 15 | -0.57537       | 1.99918 | 4.56751 | 0.00869 | 6.57537 |
| H                  | 16 | 0.20028        | 0.00000 | 0.79821 | 0.00152 | 0.79972 |
| H                  | 17 | 0.20487        | 0.00000 | 0.79391 | 0.00122 | 0.79513 |
| H                  | 18 | 0.19515        | 0.00000 | 0.80358 | 0.00128 | 0.80485 |
| C                  | 19 | -0.57249       | 1.99921 | 4.56412 | 0.00915 | 6.57249 |
| H                  | 20 | 0.18712        | 0.00000 | 0.81143 | 0.00145 | 0.81288 |
| H                  | 21 | 0.20564        | 0.00000 | 0.79308 | 0.00128 | 0.79436 |
| H                  | 22 | 0.19500        | 0.00000 | 0.80320 | 0.00180 | 0.80500 |
| C                  | 23 | 0.43811        | 1.99899 | 3.53549 | 0.02741 | 5.56189 |
| C                  | 24 | -0.64322       | 1.99907 | 4.63517 | 0.00897 | 6.64322 |
| H                  | 25 | 0.22914        | 0.00000 | 0.76956 | 0.00130 | 0.77086 |
| H                  | 26 | 0.23090        | 0.00000 | 0.76802 | 0.00108 | 0.76910 |
| H                  | 27 | 0.22620        | 0.00000 | 0.77263 | 0.00117 | 0.77380 |
| C                  | 28 | 0.12497        | 1.99877 | 3.84993 | 0.02633 | 5.87503 |
| C                  | 29 | 0.00842        | 1.99899 | 3.96861 | 0.02398 | 5.99158 |
| C                  | 30 | -0.14450       | 1.99889 | 4.13151 | 0.01410 | 6.14450 |
| C                  | 31 | -0.15976       | 1.99921 | 4.14673 | 0.01382 | 6.15976 |
| C                  | 32 | -0.10540       | 1.99904 | 4.09247 | 0.01388 | 6.10540 |
| C                  | 33 | -0.21067       | 1.99907 | 4.19448 | 0.01712 | 6.21067 |
| C                  | 34 | -0.15871       | 1.99911 | 4.14313 | 0.01646 | 6.15871 |
| C                  | 35 | -0.57500       | 1.99917 | 4.56730 | 0.00853 | 6.57500 |
| H                  | 36 | 0.19287        | 0.00000 | 0.80572 | 0.00141 | 0.80713 |
| H                  | 37 | 0.20351        | 0.00000 | 0.79524 | 0.00125 | 0.79649 |
| H                  | 38 | 0.20463        | 0.00000 | 0.79419 | 0.00118 | 0.79537 |
| C                  | 39 | -0.57955       | 1.99918 | 4.57088 | 0.00949 | 6.57955 |

|    |     |          |          |         |         |          |
|----|-----|----------|----------|---------|---------|----------|
| H  | 40  | 0.18269  | 0.00000  | 0.81581 | 0.00150 | 0.81731  |
| H  | 41  | 0.20379  | 0.00000  | 0.79483 | 0.00138 | 0.79621  |
| H  | 42  | 0.19892  | 0.00000  | 0.79958 | 0.00150 | 0.80108  |
| C  | 43  | 0.44205  | 1.99898  | 3.53214 | 0.02683 | 5.55795  |
| C  | 44  | -0.64322 | 1.99907  | 4.63557 | 0.00858 | 6.64322  |
| H  | 45  | 0.22869  | 0.00000  | 0.77005 | 0.00126 | 0.77131  |
| H  | 46  | 0.22885  | 0.00000  | 0.77014 | 0.00100 | 0.77115  |
| H  | 47  | 0.22750  | 0.00000  | 0.77147 | 0.00104 | 0.77250  |
| C  | 48  | 0.13306  | 1.99878  | 3.84247 | 0.02569 | 5.86694  |
| C  | 49  | -0.02058 | 1.99897  | 3.99817 | 0.02344 | 6.02058  |
| C  | 50  | -0.16267 | 1.99907  | 4.14932 | 0.01428 | 6.16267  |
| C  | 51  | -0.14355 | 1.99914  | 4.13096 | 0.01345 | 6.14355  |
| C  | 52  | -0.16506 | 1.99921  | 4.15091 | 0.01494 | 6.16506  |
| C  | 53  | -0.21333 | 1.99906  | 4.19751 | 0.01676 | 6.21333  |
| C  | 54  | -0.15643 | 1.99916  | 4.14157 | 0.01570 | 6.15643  |
| C  | 55  | -0.57278 | 1.99916  | 4.56494 | 0.00867 | 6.57278  |
| H  | 56  | 0.20525  | 0.00000  | 0.79315 | 0.00160 | 0.79475  |
| H  | 57  | 0.20491  | 0.00000  | 0.79381 | 0.00128 | 0.79509  |
| H  | 58  | 0.18214  | 0.00000  | 0.81631 | 0.00155 | 0.81786  |
| C  | 59  | -0.58716 | 1.99918  | 4.57937 | 0.00861 | 6.58716  |
| H  | 60  | 0.19449  | 0.00000  | 0.80430 | 0.00122 | 0.80551  |
| H  | 61  | 0.20866  | 0.00000  | 0.79019 | 0.00115 | 0.79134  |
| H  | 62  | 0.20102  | 0.00000  | 0.79736 | 0.00162 | 0.79898  |
| H  | 63  | 0.19340  | 0.00000  | 0.80495 | 0.00166 | 0.80660  |
| H  | 64  | 0.18385  | 0.00000  | 0.81429 | 0.00185 | 0.81615  |
| H  | 65  | 0.10115  | 0.00000  | 0.89645 | 0.00241 | 0.89885  |
| H  | 66  | 0.18141  | 0.00000  | 0.81647 | 0.00212 | 0.81859  |
| H  | 67  | 0.16590  | 0.00000  | 0.83099 | 0.00311 | 0.83410  |
| H  | 68  | 0.15083  | 0.00000  | 0.84688 | 0.00229 | 0.84917  |
| H  | 69  | 0.19216  | 0.00000  | 0.80599 | 0.00185 | 0.80784  |
| H  | 70  | 0.13892  | 0.00000  | 0.85944 | 0.00164 | 0.86108  |
| H  | 71  | 0.16772  | 0.00000  | 0.83028 | 0.00200 | 0.83228  |
| H  | 72  | 0.18498  | 0.00000  | 0.81233 | 0.00270 | 0.81502  |
| H  | 73  | 0.18826  | 0.00000  | 0.81006 | 0.00168 | 0.81174  |
| H  | 74  | 0.17266  | 0.00000  | 0.82548 | 0.00186 | 0.82734  |
| H  | 75  | 0.18662  | 0.00000  | 0.81182 | 0.00156 | 0.81338  |
| H  | 76  | 0.17577  | 0.00000  | 0.82243 | 0.00180 | 0.82423  |
| H  | 77  | 0.18251  | 0.00000  | 0.81487 | 0.00262 | 0.81749  |
| N  | 78  | -0.59109 | 1.99934  | 5.56731 | 0.02444 | 7.59109  |
| N  | 79  | -0.61582 | 1.99936  | 5.59228 | 0.02418 | 7.61582  |
| N  | 80  | -0.61403 | 1.99932  | 5.58912 | 0.02559 | 7.61403  |
| Tl | 81  | 0.82255  | 77.98527 | 2.17486 | 0.01732 | 80.17745 |
| Tl | 82  | 0.82242  | 77.98527 | 2.17498 | 0.01733 | 80.17758 |
| C  | 83  | 0.13144  | 1.99873  | 3.84063 | 0.02920 | 5.86856  |
| C  | 84  | -0.02330 | 1.99891  | 3.99878 | 0.02562 | 6.02330  |
| C  | 85  | -0.17253 | 1.99906  | 4.15778 | 0.01570 | 6.17253  |
| C  | 86  | -0.16527 | 1.99917  | 4.15020 | 0.01589 | 6.16527  |
| C  | 87  | -0.07728 | 1.99858  | 4.06241 | 0.01630 | 6.07728  |
| C  | 88  | -0.19753 | 1.99904  | 4.18072 | 0.01777 | 6.19753  |
| C  | 89  | -0.33515 | 1.99882  | 4.30504 | 0.03129 | 6.33515  |
| H  | 90  | 0.22738  | 0.00000  | 0.77074 | 0.00188 | 0.77262  |
| C  | 91  | 0.44060  | 1.99900  | 3.53389 | 0.02651 | 5.55940  |
| C  | 92  | -0.64183 | 1.99907  | 4.63411 | 0.00865 | 6.64183  |
| H  | 93  | 0.22509  | 0.00000  | 0.77348 | 0.00144 | 0.77491  |
| H  | 94  | 0.23023  | 0.00000  | 0.76875 | 0.00102 | 0.76977  |
| H  | 95  | 0.22854  | 0.00000  | 0.77045 | 0.00101 | 0.77146  |
| C  | 96  | -0.13743 | 1.99896  | 4.12178 | 0.01669 | 6.13743  |
| C  | 97  | -0.57533 | 1.99918  | 4.56747 | 0.00869 | 6.57533  |
| H  | 98  | 0.20028  | 0.00000  | 0.79820 | 0.00151 | 0.79972  |
| H  | 99  | 0.20487  | 0.00000  | 0.79391 | 0.00122 | 0.79513  |
| H  | 100 | 0.19504  | 0.00000  | 0.80368 | 0.00128 | 0.80496  |
| C  | 101 | -0.57224 | 1.99921  | 4.56388 | 0.00915 | 6.57224  |

|       |          |         |         |         |         |
|-------|----------|---------|---------|---------|---------|
| H 102 | 0.18701  | 0.00000 | 0.81153 | 0.00145 | 0.81299 |
| H 103 | 0.20569  | 0.00000 | 0.79304 | 0.00128 | 0.79431 |
| H 104 | 0.19484  | 0.00000 | 0.80335 | 0.00180 | 0.80516 |
| C 105 | 0.43817  | 1.99899 | 3.53544 | 0.02740 | 5.56183 |
| C 106 | -0.64379 | 1.99907 | 4.63573 | 0.00898 | 6.64379 |
| H 107 | 0.22924  | 0.00000 | 0.76945 | 0.00130 | 0.77076 |
| H 108 | 0.23097  | 0.00000 | 0.76795 | 0.00108 | 0.76903 |
| H 109 | 0.22653  | 0.00000 | 0.77231 | 0.00117 | 0.77347 |
| C 110 | 0.12484  | 1.99877 | 3.85007 | 0.02632 | 5.87516 |
| C 111 | 0.00806  | 1.99899 | 3.96895 | 0.02400 | 5.99194 |
| C 112 | -0.14391 | 1.99889 | 4.13093 | 0.01410 | 6.14391 |
| C 113 | -0.15981 | 1.99921 | 4.14678 | 0.01382 | 6.15981 |
| C 114 | -0.10597 | 1.99905 | 4.09304 | 0.01389 | 6.10597 |
| C 115 | -0.21035 | 1.99907 | 4.19416 | 0.01711 | 6.21035 |
| C 116 | -0.15838 | 1.99912 | 4.14281 | 0.01646 | 6.15838 |
| C 117 | -0.57490 | 1.99917 | 4.56721 | 0.00852 | 6.57490 |
| H 118 | 0.19282  | 0.00000 | 0.80577 | 0.00141 | 0.80718 |
| H 119 | 0.20350  | 0.00000 | 0.79525 | 0.00125 | 0.79650 |
| H 120 | 0.20454  | 0.00000 | 0.79428 | 0.00119 | 0.79546 |
| C 121 | -0.57965 | 1.99918 | 4.57098 | 0.00949 | 6.57965 |
| H 122 | 0.18269  | 0.00000 | 0.81582 | 0.00150 | 0.81731 |
| H 123 | 0.20378  | 0.00000 | 0.79484 | 0.00138 | 0.79622 |
| H 124 | 0.19888  | 0.00000 | 0.79961 | 0.00150 | 0.80112 |
| C 125 | 0.44183  | 1.99898 | 3.53237 | 0.02681 | 5.55817 |
| C 126 | -0.64328 | 1.99907 | 4.63563 | 0.00858 | 6.64328 |
| H 127 | 0.22866  | 0.00000 | 0.77008 | 0.00126 | 0.77134 |
| H 128 | 0.22887  | 0.00000 | 0.77013 | 0.00100 | 0.77113 |
| H 129 | 0.22761  | 0.00000 | 0.77136 | 0.00103 | 0.77239 |
| C 130 | 0.13277  | 1.99878 | 3.84278 | 0.02567 | 5.86723 |
| C 131 | -0.02051 | 1.99897 | 3.99808 | 0.02345 | 6.02051 |
| C 132 | -0.16253 | 1.99907 | 4.14918 | 0.01428 | 6.16253 |
| C 133 | -0.14383 | 1.99914 | 4.13124 | 0.01345 | 6.14383 |
| C 134 | -0.16484 | 1.99921 | 4.15068 | 0.01494 | 6.16484 |
| C 135 | -0.21329 | 1.99906 | 4.19747 | 0.01677 | 6.21329 |
| C 136 | -0.15642 | 1.99916 | 4.14155 | 0.01571 | 6.15642 |
| C 137 | -0.57292 | 1.99916 | 4.56509 | 0.00867 | 6.57292 |
| H 138 | 0.20536  | 0.00000 | 0.79305 | 0.00159 | 0.79464 |
| H 139 | 0.20501  | 0.00000 | 0.79371 | 0.00128 | 0.79499 |
| H 140 | 0.18206  | 0.00000 | 0.81638 | 0.00156 | 0.81794 |
| C 141 | -0.58697 | 1.99917 | 4.57918 | 0.00861 | 6.58697 |
| H 142 | 0.19446  | 0.00000 | 0.80432 | 0.00122 | 0.80554 |
| H 143 | 0.20854  | 0.00000 | 0.79032 | 0.00115 | 0.79146 |
| H 144 | 0.20100  | 0.00000 | 0.79739 | 0.00161 | 0.79900 |
| H 145 | 0.19338  | 0.00000 | 0.80497 | 0.00166 | 0.80662 |
| H 146 | 0.18384  | 0.00000 | 0.81431 | 0.00185 | 0.81616 |
| H 147 | 0.10115  | 0.00000 | 0.89645 | 0.00241 | 0.89885 |
| H 148 | 0.18141  | 0.00000 | 0.81647 | 0.00212 | 0.81859 |
| H 149 | 0.16577  | 0.00000 | 0.83113 | 0.00310 | 0.83423 |
| H 150 | 0.15045  | 0.00000 | 0.84726 | 0.00229 | 0.84955 |
| H 151 | 0.19217  | 0.00000 | 0.80598 | 0.00185 | 0.80783 |
| H 152 | 0.13935  | 0.00000 | 0.85901 | 0.00165 | 0.86065 |
| H 153 | 0.16766  | 0.00000 | 0.83035 | 0.00200 | 0.83234 |
| H 154 | 0.18488  | 0.00000 | 0.81242 | 0.00270 | 0.81512 |
| H 155 | 0.18839  | 0.00000 | 0.80994 | 0.00167 | 0.81161 |
| H 156 | 0.17266  | 0.00000 | 0.82547 | 0.00187 | 0.82734 |
| H 157 | 0.18659  | 0.00000 | 0.81185 | 0.00156 | 0.81341 |
| H 158 | 0.17576  | 0.00000 | 0.82244 | 0.00180 | 0.82424 |
| H 159 | 0.18244  | 0.00000 | 0.81495 | 0.00262 | 0.81756 |
| N 160 | -0.59080 | 1.99934 | 5.56699 | 0.02447 | 7.59080 |
| N 161 | -0.61556 | 1.99936 | 5.59202 | 0.02418 | 7.61556 |
| N 162 | -0.61396 | 1.99932 | 5.58905 | 0.02559 | 7.61396 |

=====

\* Total \* 2.00000 303.90060 390.62231 1.47709 696.00000

Natural Population

-----  
Effective Core 136.00000  
Core 167.90060 ( 99.9408% of 168)  
Valence 390.62231 ( 99.6485% of 392)  
Natural Minimal Basis 694.52291 ( 99.7878% of 696)  
Natural Rydberg Basis 1.47709 ( 0.2122% of 696)  
-----

Atom No Natural Electron Configuration

-----  
C 1 [core]2S( 0.96)2p( 3.34)3p( 0.03)  
H 2 1S( 0.77)  
C 3 [core]2S( 0.86)2p( 2.68)3p( 0.02)  
C 4 [core]2S( 1.02)2p( 3.61)3p( 0.01)  
H 5 1S( 0.77)  
H 6 1S( 0.77)  
H 7 1S( 0.77)  
C 8 [core]2S( 0.84)2p( 3.00)3p( 0.03)  
C 9 [core]2S( 0.89)2p( 3.11)3p( 0.02)  
C 10 [core]2S( 0.94)2p( 3.22)3p( 0.01)  
C 11 [core]2S( 0.94)2p( 3.21)3p( 0.01)  
C 12 [core]2S( 0.87)2p( 3.19)3p( 0.02)  
C 13 [core]2S( 0.93)2p( 3.25)3p( 0.02)  
C 14 [core]2S( 0.92)2p( 3.20)3p( 0.02)  
C 15 [core]2S( 1.01)2p( 3.56)3p( 0.01)  
H 16 1S( 0.80)  
H 17 1S( 0.79)  
H 18 1S( 0.80)  
C 19 [core]2S( 1.00)2p( 3.56)3p( 0.01)  
H 20 1S( 0.81)  
H 21 1S( 0.79)  
H 22 1S( 0.80)  
C 23 [core]2S( 0.86)2p( 2.68)3p( 0.02)  
C 24 [core]2S( 1.02)2p( 3.61)3p( 0.01)  
H 25 1S( 0.77)  
H 26 1S( 0.77)  
H 27 1S( 0.77)  
C 28 [core]2S( 0.84)2p( 3.01)3p( 0.02)  
C 29 [core]2S( 0.89)2p( 3.08)3p( 0.02)  
C 30 [core]2S( 0.89)2p( 3.24)3p( 0.01)  
C 31 [core]2S( 0.93)2p( 3.21)3p( 0.01)  
C 32 [core]2S( 0.91)2p( 3.18)3p( 0.01)  
C 33 [core]2S( 0.92)2p( 3.27)3p( 0.02)  
C 34 [core]2S( 0.95)2p( 3.20)3p( 0.02)  
C 35 [core]2S( 1.01)2p( 3.55)3p( 0.01)  
H 36 1S( 0.81)  
H 37 1S( 0.80)  
H 38 1S( 0.79)  
C 39 [core]2S( 1.01)2p( 3.56)3p( 0.01)  
H 40 1S( 0.82)  
H 41 1S( 0.79)  
H 42 1S( 0.80)  
C 43 [core]2S( 0.85)2p( 2.68)3p( 0.02)  
C 44 [core]2S( 1.02)2p( 3.61)3p( 0.01)  
H 45 1S( 0.77)  
H 46 1S( 0.77)  
H 47 1S( 0.77)  
C 48 [core]2S( 0.84)2p( 3.00)3p( 0.02)  
C 49 [core]2S( 0.89)2p( 3.11)3p( 0.02)

C 50 [core]2S( 0.93)2p( 3.22)3p( 0.01)  
C 51 [core]2S( 0.93)2p( 3.20)3p( 0.01)  
C 52 [core]2S( 0.94)2p( 3.21)3p( 0.01)  
C 53 [core]2S( 0.92)2p( 3.28)3p( 0.02)  
C 54 [core]2S( 0.95)2p( 3.19)3p( 0.02)  
C 55 [core]2S( 1.01)2p( 3.55)3p( 0.01)  
H 56 1S( 0.79)  
H 57 1S( 0.79)  
H 58 1S( 0.82)  
C 59 [core]2S( 1.01)2p( 3.57)3p( 0.01)  
H 60 1S( 0.80)  
H 61 1S( 0.79)  
H 62 1S( 0.80)  
H 63 1S( 0.80)  
H 64 1S( 0.81)  
H 65 1S( 0.90)  
H 66 1S( 0.82)  
H 67 1S( 0.83)  
H 68 1S( 0.85)  
H 69 1S( 0.81)  
H 70 1S( 0.86)  
H 71 1S( 0.83)  
H 72 1S( 0.81)  
H 73 1S( 0.81)  
H 74 1S( 0.83)  
H 75 1S( 0.81)  
H 76 1S( 0.82)  
H 77 1S( 0.81)  
N 78 [core]2S( 1.35)2p( 4.22)3p( 0.02)  
N 79 [core]2S( 1.36)2p( 4.23)3p( 0.02)  
N 80 [core]2S( 1.35)2p( 4.24)3p( 0.02)  
Tl 81 [core]6S( 1.86)6p( 0.32)7p( 0.02)  
Tl 82 [core]6S( 1.86)6p( 0.32)7p( 0.02)  
C 83 [core]2S( 0.84)2p( 3.00)3p( 0.03)  
C 84 [core]2S( 0.89)2p( 3.11)3p( 0.02)  
C 85 [core]2S( 0.94)2p( 3.22)3p( 0.01)  
C 86 [core]2S( 0.94)2p( 3.21)3p( 0.01)  
C 87 [core]2S( 0.87)2p( 3.19)3p( 0.02)  
C 88 [core]2S( 0.93)2p( 3.25)3p( 0.02)  
C 89 [core]2S( 0.96)2p( 3.34)3p( 0.03)  
H 90 1S( 0.77)  
C 91 [core]2S( 0.86)2p( 2.68)3p( 0.02)  
C 92 [core]2S( 1.02)2p( 3.61)3p( 0.01)  
H 93 1S( 0.77)  
H 94 1S( 0.77)  
H 95 1S( 0.77)  
C 96 [core]2S( 0.92)2p( 3.20)3p( 0.02)  
C 97 [core]2S( 1.01)2p( 3.56)3p( 0.01)  
H 98 1S( 0.80)  
H 99 1S( 0.79)  
H 100 1S( 0.80)  
C 101 [core]2S( 1.00)2p( 3.56)3p( 0.01)  
H 102 1S( 0.81)  
H 103 1S( 0.79)  
H 104 1S( 0.80)  
C 105 [core]2S( 0.86)2p( 2.68)3p( 0.02)  
C 106 [core]2S( 1.02)2p( 3.61)3p( 0.01)  
H 107 1S( 0.77)  
H 108 1S( 0.77)  
H 109 1S( 0.77)  
C 110 [core]2S( 0.84)2p( 3.01)3p( 0.02)  
C 111 [core]2S( 0.89)2p( 3.08)3p( 0.02)

C 112 [core]2S( 0.89)2p( 3.24)3p( 0.01)  
C 113 [core]2S( 0.93)2p( 3.21)3p( 0.01)  
C 114 [core]2S( 0.91)2p( 3.18)3p( 0.01)  
C 115 [core]2S( 0.92)2p( 3.27)3p( 0.02)  
C 116 [core]2S( 0.95)2p( 3.20)3p( 0.02)  
C 117 [core]2S( 1.01)2p( 3.55)3p( 0.01)  
H 118 1S( 0.81)  
H 119 1S( 0.80)  
H 120 1S( 0.79)  
C 121 [core]2S( 1.01)2p( 3.56)3p( 0.01)  
H 122 1S( 0.82)  
H 123 1S( 0.79)  
H 124 1S( 0.80)  
C 125 [core]2S( 0.85)2p( 2.68)3p( 0.02)  
C 126 [core]2S( 1.02)2p( 3.61)3p( 0.01)  
H 127 1S( 0.77)  
H 128 1S( 0.77)  
H 129 1S( 0.77)  
C 130 [core]2S( 0.84)2p( 3.00)3p( 0.02)  
C 131 [core]2S( 0.89)2p( 3.11)3p( 0.02)  
C 132 [core]2S( 0.93)2p( 3.22)3p( 0.01)  
C 133 [core]2S( 0.93)2p( 3.21)3p( 0.01)  
C 134 [core]2S( 0.94)2p( 3.21)3p( 0.01)  
C 135 [core]2S( 0.92)2p( 3.28)3p( 0.02)  
C 136 [core]2S( 0.95)2p( 3.19)3p( 0.02)  
C 137 [core]2S( 1.01)2p( 3.55)3p( 0.01)  
H 138 1S( 0.79)  
H 139 1S( 0.79)  
H 140 1S( 0.82)  
C 141 [core]2S( 1.01)2p( 3.57)3p( 0.01)  
H 142 1S( 0.80)  
H 143 1S( 0.79)  
H 144 1S( 0.80)  
H 145 1S( 0.80)  
H 146 1S( 0.81)  
H 147 1S( 0.90)  
H 148 1S( 0.82)  
H 149 1S( 0.83)  
H 150 1S( 0.85)  
H 151 1S( 0.81)  
H 152 1S( 0.86)  
H 153 1S( 0.83)  
H 154 1S( 0.81)  
H 155 1S( 0.81)  
H 156 1S( 0.83)  
H 157 1S( 0.81)  
H 158 1S( 0.82)  
H 159 1S( 0.81)  
N 160 [core]2S( 1.35)2p( 4.22)3p( 0.02)  
N 161 [core]2S( 1.36)2p( 4.23)3p( 0.02)  
N 162 [core]2S( 1.35)2p( 4.24)3p( 0.02)

NBO analysis skipped by request.

1|1|UNPC-E-C07CYG43054|SP|RB3LYP|LANL2DZ|C68H86N6T12(2+)|MCDSTFM|03-Ap  
r-2013|0|# b3lyp/lanl2dz guess=local pop=npa geom=connectivity||CSD E  
NTRY ofm27p-1||2,1|C,0,-3.903023,0.051295,-2.737981|H,0,-4.514533,0.08  
5596,-3.503394|C,0,-2.503247,-0.227432,-3.276213|C,0,-2.460164,-0.9729  
3,-4.569492|H,0,-1.545611,-1.129417,-4.817515|H,0,-2.892297,-0.452722,  
-5.252444|H,0,-2.914133,-1.812707,-4.470777|C,0,-0.170439,-0.150782,-2  
.958032|C,0,0.684185,0.872376,-3.360395|C,0,2.019408,0.533222,-3.58217  
4|C,0,2.485112,-0.764383,-3.385337|C,0,1.626865,-1.746963,-2.977845|C,

0,0.293215,-1.440024,-2.76505|C,0,0.184239,2.270912,-3.616048|C,0,0.07  
5302,2.538076,-5.096013|H,0,0.950346,2.513578,-5.490651|H,0,-0.31535,3  
.402468,-5.238301|H,0,-0.477148,1.865062,-5.502998|C,0,1.011329,3.3330  
35,-2.953263|H,0,1.034524,3.177106,-2.005839|H,0,0.627484,4.194823,-3.  
12687|H,0,1.907183,3.306084,-3.303069|C,0,-4.397058,-1.03942,-1.801017  
|C,0,-5.870231,-1.237389,-1.780559|H,0,-6.091786,-1.92487,-1.148722|H,  
0,-6.170325,-1.496216,-2.654573|H,0,-6.299217,-0.417141,-1.523277|C,0,  
-3.930526,-2.580467,-0.074942|C,0,-3.537481,-3.9179,-0.181117|C,0,-3.8  
687,-4.722562,0.913689|C,0,-4.486773,-4.273217,2.005895|C,0,-4.844529,  
-2.938962,2.109501|C,0,-4.561165,-2.096006,1.051875|C,0,-2.743405,-4.4  
17091,-1.351036|C,0,-3.218501,-5.772304,-1.879589|H,0,-3.237334,-6.408  
158,-1.160273|H,0,-2.617282,-6.078198,-2.561382|H,0,-4.100692,-5.67953  
3,-2.24793|C,0,-1.265249,-4.513108,-0.965484|H,0,-0.951616,-3.65163,-0  
.678966|H,0,-0.754039,-4.801185,-1.727045|H,0,-1.160762,-5.146678,-0.2  
52564|C,0,-3.945046,1.410207,-2.054612|C,0,-4.205935,2.575653,-2.95337  
1|H,0,-4.280814,3.375466,-2.426758|H,0,-5.022881,2.43207,-3.435929|H,0  
,-3.479994,2.669176,-3.574825|C,0,-3.652669,2.677734,-0.075475|C,0,-4.  
641162,2.969572,0.868363|C,0,-4.446268,4.099082,1.65003|C,0,-3.329395,  
4.893029,1.516565|C,0,-2.380753,4.600231,0.572637|C,0,-2.53584,3.48771  
7,-0.227047|C,0,-5.870955,2.099481,0.968797|C,0,-6.904465,2.519616,-0.  
066748|H,0,-7.202563,3.411803,0.123697|H,0,-7.652825,1.918078,-0.03450  
7|H,0,-6.510077,2.493668,-0.940994|C,0,-6.505344,2.084019,2.364325|H,0  
,-5.825671,1.911567,3.021302|H,0,-7.171417,1.392791,2.406236|H,0,-6.91  
2835,2.933227,2.539671|H,0,2.65523,1.199916,-3.845393|H,0,3.404316,-0.  
872897,-3.515165|H,0,1.834315,-2.474982,-2.848538|H,0,-0.287553,-2.068  
439,-2.397481|H,0,-0.623664,2.406848,-3.216657|H,0,-3.527049,-5.49686,  
0.780988|H,0,-4.706301,-4.730062,2.803385|H,0,-5.227296,-2.596463,2.78  
4907|H,0,-4.79531,-1.214323,1.081259|H,0,-2.826831,-3.811705,-2.100233  
|H,0,-5.041747,4.344775,2.343442|H,0,-3.322704,5.561882,2.121677|H,0,-  
1.641429,5.183719,0.4565|H,0,-1.893421,3.336427,-0.866954|H,0,-5.61291  
1,1.174631,0.717379|N,0,-1.519237,0.154047,-2.581712|N,0,-3.535959,-1.  
658124,-1.095997|N,0,-3.736426,1.452274,-0.810506|Ti,0,-1.816362,-0.09  
5993,0.135685|Ti,0,1.816323,0.09545,-0.136066|C,0,0.170681,0.151034,2.  
958188|C,0,-0.683944,-0.872124,3.360551|C,0,-2.019167,-0.53297,3.58233  
1|C,0,-2.484871,0.764635,3.385494|C,0,-1.626623,1.747215,2.978002|C,0,  
-0.292974,1.440276,2.765207|C,0,3.902984,-0.051837,2.7376|H,0,4.514774  
87,4.569111|H,0,1.545852,1.129669,4.817671|H,0,2.892539,0.452974,5.252  
601|H,0,2.914375,1.812959,4.470934|C,0,-0.183997,-2.27066,3.616204|C,0  
,-0.075061,-2.537824,5.09617|H,0,-0.950105,-2.513326,5.490807|H,0,0.31  
5592,-3.402216,5.238458|H,0,0.477109,-1.865605,5.502617|C,0,-1.012327,  
-3.333367,2.953071|H,0,-1.034283,-3.176854,2.005995|H,0,-0.627206,-4.1  
95139,3.127848|H,0,-1.906942,-3.305832,3.303225|C,0,4.397299,1.039672,  
1.801173|C,0,5.869514,1.237852,1.780905|H,0,6.092028,1.925122,1.148879  
|H,0,6.169608,1.496679,2.654918|H,0,6.299178,0.416598,1.522896|C,0,3.9  
29808,2.58093,0.075287|C,0,3.537442,3.917358,0.180736|C,0,3.868942,4.7  
22814,-0.913532|C,0,4.487014,4.273469,-2.005739|C,0,4.843811,2.939425,  
-2.109156|C,0,4.561407,2.096258,-1.051719|C,0,2.743647,4.417343,1.3511  
92|C,0,3.218742,5.772556,1.879746|H,0,3.237295,6.407615,1.159892|H,0,2  
.617523,6.07845,2.561539|H,0,4.100653,5.67899,2.247549|C,0,1.26549,4.5  
13361,0.96564|H,0,0.951858,3.651882,0.679122|H,0,0.754281,4.801437,1.7  
27201|H,0,1.161003,5.14693,0.252721|C,0,3.945288,-1.409955,2.054769|C,  
0,4.206177,-2.575401,2.953528|H,0,4.281056,-3.375214,2.426914|H,0,5.02  
3122,-2.431818,3.436086|H,0,3.480273,-2.669493,3.575803|C,0,3.652911,-  
2.677482,0.075632|C,0,4.640444,-2.969109,-0.868017|C,0,4.445269,-4.099  
414,-1.650222|C,0,3.329636,-4.892777,-1.516408|C,0,2.380994,-4.599979,  
-0.57248|C,0,2.536082,-3.487465,0.227203|C,0,5.870238,-2.099018,-0.968  
451|C,0,6.903748,-2.519153,0.067093|H,0,7.202804,-3.41155,-0.123541|H,  
0,7.653067,-1.917826,0.034663|H,0,6.509079,-2.494,0.940802|C,0,6.50558  
6,-2.083767,-2.364168|H,0,5.825913,-1.911315,-3.021146|H,0,7.170699,-1  
.392328,-2.40589|H,0,6.913077,-2.932975,-2.539515|H,0,-2.654988,-1.199  
664,3.84555|H,0,-3.404074,0.873149,3.515322|H,0,-1.834074,2.475234,2.8



48695|H,0,0.287795,2.068691,2.397638|H,0,0.623905,-2.406596,3.216814|H  
,0,3.527009,5.496317,-0.781369|H,0,4.706543,4.730314,-2.803228|H,0,5.2  
27537,2.596715,-2.784751|H,0,4.795551,1.214575,-1.081102|H,0,2.827073,  
3.811957,2.10039|H,0,5.041988,-4.344523,-2.343285|H,0,3.321986,-5.5614  
2,-2.121332|H,0,1.641671,-5.183467,-0.456343|H,0,1.893663,-3.336175,0.  
867111|H,0,5.613153,-1.174379,-0.717222|N,0,1.519479,-0.153795,2.58186  
9|N,0,3.5362,1.658376,1.096154|N,0,3.736668,-1.452022,0.810662||Versio  
n=IA32W-G09RevB.01|State=1-A|HF=-3072.0579794|RMSD=5.507e-009|Dipole=-  
0.0003059,-0.0004876,-0.0011615|Quadrupole=42.2194261,-22.6486038,-19.  
5708223,-3.9670195,20.6468479,-0.2702449|PG=C01 [X(C68H86N6T12)]||@

A HARD FALL SHOULD MEAN A HIGH BOUNCE  
IF ONE IS MADE OF THE RIGHT MATERIAL.

-- THE CHEMIST ANALYST, MARCH 1950

Job cpu time: 0 days 9 hours 36 minutes 6.0 seconds.

File lengths (MBytes): RWF= 403 Int= 0 D2E= 0 Chk= 28 Scr= 1

Normal termination of Gaussian 09 at Wed Apr 03 22:53:43 2013.
